# Supplementary material for: Studies of Health Insurance Claims Data in Japan: A Scoping Review
Source: PubMed Central journal article supplement (PMC10407298; doi:10.31662/jmaj.2022-0184), 2023-06-19
Supplement: 2433-3298-6-3-0233-s001.pdf [file 2433-3298-6-3-0233-s001.pdf]

## Supplement file 1 Search strategy

| Ichushi-Web                                                                 |                                                                                                                                                                                                                                                   | Results |
|-----------------------------------------------------------------------------|---------------------------------------------------------------------------------------------------------------------------------------------------------------------------------------------------------------------------------------------------|---------|
| #1                                                                          | NDB/AL and (data/TA or information/TA or (database/TH or database/AL))                                                                                                                                                                            | 451     |
| #2                                                                          | (nation/TA or Japan/TA) and (health/TA or insurance/TA or administrative/TA) and claim/TA                                                                                                                                                         | 62      |
| #3                                                                          | (nation/TA or Japan/TA) and claim/TA and database/TA                                                                                                                                                                                              | 86      |
| #4                                                                          | national database/AL or national claims database/AL                                                                                                                                                                                               | 112     |
| #5                                                                          | (claims data/TA or specific health checkups/TA or specific health guidance/TA) and (database/TH or database/AL)                                                                                                                                   | 325     |
| #6                                                                          | #1 or #2 or #3 or #4 or #5                                                                                                                                                                                                                        | 806     |
| #7                                                                          | JMDC/AL                                                                                                                                                                                                                                           | 51      |
| #8                                                                          | Japan Medical Data Center/AL or (Japan/TA and medical/TA and data/TA and center/TA)                                                                                                                                                               | 70      |
| #9                                                                          | employ/TA and health/TA and insurance/TA                                                                                                                                                                                                          | 5       |
| #10                                                                         | #7 or #8 or #9                                                                                                                                                                                                                                    | 116     |
| #11                                                                         | MDV/AL and (data/TA or information/TA or (database/TH or database/AL))                                                                                                                                                                            | 18      |
| #12                                                                         | Medical Data Vision/AL or Medical·Data·Vision/AL                                                                                                                                                                                                  | 74      |
| #13                                                                         | #11 or #12                                                                                                                                                                                                                                        | 86      |
| #14                                                                         | KDB/AL or kokuho database/AL or (Kokuho/TA and database/TA)                                                                                                                                                                                       | 73      |
| #15                                                                         | ((public health insurance/TH or public health insurance/AL) or health insurance/TA or medical insurance/TA or community insurance/TA) and (database/TH or database/AL)                                                                            | 358     |
| #16                                                                         | (Kokuho/TA or Shaho/TA or Kempo/TA or Kenpo/TA) and (data/TA or information/TA or (database/TH or database/AL))                                                                                                                                   | 318     |
| #17                                                                         | #14 or #15 or #16                                                                                                                                                                                                                                 | 675     |
| #18                                                                         | ((insurance claim/TH or claim/AL) or health insurance claim/AL or insurance claim/AL or claim/AL or (health insurance/TH or health insurance/AL)) and (data/TA or information/TA or (database/TH or database/AL))                                 | 2,262   |
| #19                                                                         | health/TA and (insurance/TA or administrative/TA) and claim/TA                                                                                                                                                                                    | 46      |
| #20                                                                         | #18 or #19                                                                                                                                                                                                                                        | 2,276   |
| #21                                                                         | (DPC/TA or PDPS/TA or DRG/TA) and (data/TA or information/TA or (database/TH or database/AL))                                                                                                                                                     | 2,432   |
| #22                                                                         | (Diagnosis Procedure Combination/Per-Diem Payment System/TH or Per-Diem Payment System/AL or Diagnosis Procedure Combination/AL or Diagnosis Group/AL or Disease by Diagnosis/AL) and (data/TA or information/TA or (database/TH or database/AL)) | 3,094   |
| #23                                                                         | (diagnos/TA and procedure/TA and combination/TA) or (diagnos/TA and related/TA and groups/TA)                                                                                                                                                     | 432     |
| #24                                                                         | #21 or #22 or #23                                                                                                                                                                                                                                 | 3,576   |
| #25                                                                         | medical/TA and electronic/TA and claim/TA                                                                                                                                                                                                         | 10      |
| #26                                                                         | #6 or #10 or #13 or #17 or #20 or #24 or #25                                                                                                                                                                                                      | 6,403   |
| #27                                                                         | (#26) and (PT=Article)                                                                                                                                                                                                                            | 1,609   |
| #28                                                                         | (#26) and (PT=Review)                                                                                                                                                                                                                             | 83      |
| #29                                                                         | (#26) and (PT=Commentary)                                                                                                                                                                                                                         | 1,598   |
| #30                                                                         | (#26) and (PT=Conference Abstract)                                                                                                                                                                                                                | 3,013   |
| ※Search was conducted in Japanese (translated into English for submission). |                                                                                                                                                                                                                                                   |         |
| MEDLINE                                                                     |                                                                                                                                                                                                                                                   | Results |
| 1                                                                           | NDB.mp. and (Japan\$.mp. or Japan.in.)                                                                                                                                                                                                            | 53      |
| 2                                                                           | (nation\$ adj5 insurance adj2 claim?).mp. and (Japan\$.mp. or Japan.in.)                                                                                                                                                                          | 106     |
| 3                                                                           | 1 or 2                                                                                                                                                                                                                                            | 131     |
| 4                                                                           | (JMDC or (employ\$ adj2 health adj1 insurance)).mp. and (Japan\$.mp. or Japan.in.)                                                                                                                                                                | 100     |
| 5                                                                           | (Japan adj1 medical adj1 data adj1 center).mp. or (Japan adj1 medical adj1 data adj1 center).in.                                                                                                                                                  | 109     |
| 6                                                                           | 4 or 5                                                                                                                                                                                                                                            | 181     |
| 7                                                                           | (MDV or (medical adj1 data adj1 vision)).mp. and (Japan\$.mp. or Japan.in.)                                                                                                                                                                       | 258     |
| 8                                                                           | (medical adj1 data adj1 vision).in.                                                                                                                                                                                                               | 12      |
| 9                                                                           | 7 or 8                                                                                                                                                                                                                                            | 269     |
| 10                                                                          | (KDB.mp. and (Japan\$.mp. or Japan.in.)) or (Kokuho adj1 database?).mp.                                                                                                                                                                           | 10      |
| 11                                                                          | ((DPC and database?) or PDPS).mp. and (Japan\$.mp. or Japan.in.)                                                                                                                                                                                  | 114     |
| 12                                                                          | (diagnos\$ adj1 procedure\$ adj1 combination).mp. and (Japan\$.mp. or Japan.in.)                                                                                                                                                                  | 575     |
| 13                                                                          | (diagno\$ adj1 related adj1 groups).mp. and (Japan\$.mp. or Japan.in.)                                                                                                                                                                            | 122     |
| 14                                                                          | (per-diem adj1 payment adj1 system).mp. and (Japan\$.mp. or Japan.in.)                                                                                                                                                                            | 21      |
| 15                                                                          | diagnosis-related groups.sh. and (Japan\$.mp. or Japan.in.)                                                                                                                                                                                       | 116     |
| 16                                                                          | 11 or 12 or 13 or 14 or 15                                                                                                                                                                                                                        | 686     |
| 17                                                                          | ((medical or health or healthcare or administrative or insurance) adj5 claim?).mp. and (Japan\$.mp. or Japan.in.)                                                                                                                                 | 822     |
| 18                                                                          | (claim? adj1 (data or database)).mp. and (Japan\$.mp. or Japan.in.)                                                                                                                                                                               | 696     |
| 19                                                                          | (administrative claims, healthcare or insurance claim reporting or insurance claim review).sh. and (Japan\$.mp. or Japan.in.)                                                                                                                     | 160     |
| 20                                                                          | (nationwide adj1 database adj5 Japan\$.mp.)                                                                                                                                                                                                       | 84      |
| 21                                                                          | 17 or 18 or 19 or 20                                                                                                                                                                                                                              | 1085    |
| 22                                                                          | 3 or 6 or 9 or 10 or 16 or 21                                                                                                                                                                                                                     | 1987    |
| EMBASE                                                                      |                                                                                                                                                                                                                                                   | Results |
| #1                                                                          | (ndb OR (nation* NEXT/5 insurance NEXT/2 claim*)) AND japan*                                                                                                                                                                                      | 231     |
| #2                                                                          | (jmcdc OR (japan NEXT/1 medical NEXT/1 data NEXT/1 center)) AND japan*                                                                                                                                                                            | 304     |

|     |                                                                                             |      |
|-----|---------------------------------------------------------------------------------------------|------|
| #3  | (employ* NEXT/2 health NEXT/1 insurance) AND japan*                                         | 53   |
| #4  | #2 OR #3                                                                                    | 350  |
| #5  | (mdv:ti,ab,kw OR (medical NEXT/1 data NEXT/1 vision)) AND japan*                            | 340  |
| #6  | kdb AND japan* OR (kokuho NEXT/1 database*)                                                 | 11   |
| #7  | (dpc AND database* OR pdps) AND japan*                                                      | 277  |
| #8  | (diagnos* NEXT/1 procedure* NEXT/1 combination) AND japan*                                  | 807  |
| #9  | (diagnos* NEXT/1 related NEXT/1 group*) AND japan*                                          | 284  |
| #10 | 'diagnosis related group'/exp AND japan*                                                    | 255  |
| #11 | ('per diem' NEXT/1 payment NEXT/1 system) AND japan*                                        | 30   |
| #12 | #7 OR #8 OR #9 OR #10 OR #11                                                                | 1154 |
| #13 | ((medical OR health OR healthcare OR administrative OR insurance) NEXT/5 claim*) AND japan* | 1169 |
| #14 | (claim* NEAR/1 (data OR database*)) AND japan*                                              | 1258 |
| #15 | nationwide NEXT/1 database* NEAR/5 japan*                                                   | 105  |
| #16 | 'health insurance'/exp AND claim* AND japan*                                                | 661  |
| #17 | 'billing and claims'/exp AND japan*                                                         | 32   |
| #18 | #13 OR #14 OR #15 OR #16 OR #17                                                             | 1860 |
| #19 | #1 OR #4 OR #5 OR #6 OR #12 OR #18                                                          | 3238 |
| #20 | #19 AND ('Article'/it OR 'Article in Press'/it)                                             | 2069 |
| #21 | #19 AND 'review'/it                                                                         | 113  |
| #22 | #19 AND ('letter'/it OR 'note'/it OR 'short survey'/it)                                     | 32   |

## Supplement file 2 PRISMA-ScR CHECKLIST

| SECTION                                               | ITEM | PRISMA-ScR CHECKLIST ITEM                                                                                                                                                                                                                                                                                  | REPORTED ON PAGE #    |
|-------------------------------------------------------|------|------------------------------------------------------------------------------------------------------------------------------------------------------------------------------------------------------------------------------------------------------------------------------------------------------------|-----------------------|
| <b>TITLE</b>                                          |      |                                                                                                                                                                                                                                                                                                            |                       |
| Title                                                 | 1    | Identify the report as a scoping review.                                                                                                                                                                                                                                                                   | Title                 |
| <b>ABSTRACT</b>                                       |      |                                                                                                                                                                                                                                                                                                            |                       |
| Structured summary                                    | 2    | Provide a structured summary that includes (as applicable): background, objectives, eligibility criteria, sources of evidence, charting methods, results, and conclusions that relate to the review questions and objectives.                                                                              | Abstract              |
| <b>INTRODUCTION</b>                                   |      |                                                                                                                                                                                                                                                                                                            |                       |
| Rationale                                             | 3    | Describe the rationale for the review in the context of what is already known. Explain why the review questions/objectives lend themselves to a scoping review approach.                                                                                                                                   | p. 4                  |
| Objectives                                            | 4    | Provide an explicit statement of the questions and objectives being addressed with reference to their key elements (e.g., population or participants, concepts, and context) or other relevant key elements used to conceptualize the review questions and/or objectives.                                  | p. 4                  |
| <b>METHODS</b>                                        |      |                                                                                                                                                                                                                                                                                                            |                       |
| Protocol and registration                             | 5    | Indicate whether a review protocol exists; state if and where it can be accessed (e.g., a Web address); and if available, provide registration information, including the registration number.                                                                                                             | NA                    |
| Eligibility criteria                                  | 6    | Specify characteristics of the sources of evidence used as eligibility criteria (e.g., years considered, language, and publication status), and provide a rationale.                                                                                                                                       | p. 4                  |
| Information sources*                                  | 7    | Describe all information sources in the search (e.g., databases with dates of coverage and contact with authors to identify additional sources), as well as the date the most recent search was executed.                                                                                                  | p. 5                  |
| Search                                                | 8    | Present the full electronic search strategy for at least 1 database, including any limits used, such that it could be repeated.                                                                                                                                                                            | Supplementary file 1  |
| Selection of sources of evidence†                     | 9    | State the process for selecting sources of evidence (i.e., screening and eligibility) included in the scoping review.                                                                                                                                                                                      | p. 5                  |
| Data charting process‡                                | 10   | Describe the methods of charting data from the included sources of evidence (e.g., calibrated forms or forms that have been tested by the team before their use, and whether data charting was done independently or in duplicate) and any processes for obtaining and confirming data from investigators. | p. 6                  |
| Data items                                            | 11   | List and define all variables for which data were sought and any assumptions and simplifications made.                                                                                                                                                                                                     | p. 6                  |
| Critical appraisal of individual sources of evidence§ | 12   | If done, provide a rationale for conducting a critical appraisal of included sources of evidence; describe the methods used and how this information was used in any data synthesis (if appropriate).                                                                                                      | NA                    |
| Synthesis of results                                  | 13   | Describe the methods of handling and summarizing the data that were charted.                                                                                                                                                                                                                               | p. 6                  |
| <b>RESULTS</b>                                        |      |                                                                                                                                                                                                                                                                                                            |                       |
| Selection of sources of evidence                      | 14   | Give numbers of sources of evidence screened, assessed for eligibility, and included in the review, with reasons for exclusions at each stage, ideally using a flow diagram.                                                                                                                               | p. 6, Figure 1        |
| Characteristics of sources of evidence                | 15   | For each source of evidence, present characteristics for which data were charted and provide the citations.                                                                                                                                                                                                | p. 7, Table 1         |
| Critical appraisal within sources of evidence         | 16   | If done, present data on critical appraisal of included sources of evidence (see item 12).                                                                                                                                                                                                                 | NA                    |
| Results of individual sources of evidence             | 17   | For each included source of evidence, present the relevant data that were charted that relate to the review questions and objectives.                                                                                                                                                                      | Supplementary file 4  |
| Synthesis of results                                  | 18   | Summarize and/or present the charting results as they relate to the review questions and objectives.                                                                                                                                                                                                       | pp. 8-, Table 2 and 3 |
| <b>DISCUSSION</b>                                     |      |                                                                                                                                                                                                                                                                                                            |                       |
| Summary of evidence                                   | 19   | Summarize the main results (including an overview of concepts, themes, and types of evidence available), link to the review questions and objectives, and consider the relevance to key groups.                                                                                                            | p. 12                 |
| Limitations                                           | 20   | Discuss the limitations of the scoping review process.                                                                                                                                                                                                                                                     | p. 16                 |
| Conclusions                                           | 21   | Provide a general interpretation of the results with respect to the review questions and objectives, as well as potential implications and/or next steps.                                                                                                                                                  | p. 17                 |
| <b>FUNDING</b>                                        |      |                                                                                                                                                                                                                                                                                                            |                       |
| Funding                                               | 22   | Describe sources of funding for the included sources of evidence, as well as sources of funding for the scoping review. Describe the role of the funders of the scoping review.                                                                                                                            | Title page            |

## Supplement file 3 List of excluded studies with reasons

| ID (Author Year)     | Title (*titles translated by author)                                                                                                                                                                                                | Reason                                    | Note                                                                          |
|----------------------|-------------------------------------------------------------------------------------------------------------------------------------------------------------------------------------------------------------------------------------|-------------------------------------------|-------------------------------------------------------------------------------|
| Abe 2011             | Assessment of psychiatric outcomes in Japan based on diagnostic procedure combination information                                                                                                                                   | Hospital-based (<10 institutes)           | single-center                                                                 |
| Akira 2019           | Corrigendum to Treatment procedures and associated medical costs of methicillin-resistant Staphylococcus aureus infection in Japan: A retrospective analysis using a database of Japanese employment-based health insurance         | Others (duplicate/ no original data used) | Correction                                                                    |
| Arakaki 2012         | Editorial comment to management trends, angioembolization performance and multiorgan injury indicators of renal trauma from Japanese administrative claims database                                                                 | Others (duplicate/ no original data used) | Editorial Comment                                                             |
| Arakawa 2013         | Economic evaluation for the prevention of cervical cancer by vaccination - From perspective of health insurance society and industry                                                                                                | Combined with primary research            | (addition to data from JMDC's receipt database)                               |
| Asai 2019            | Current Difficult Airway Management-Not Good Enough!                                                                                                                                                                                | No health insurance claims data used      | closed claims                                                                 |
| Assimos 2012         | Re: Renal haemorrhage risk after extracorporeal shockwave lithotripsy: results from the Japanese Diagnosis Procedure Combination database                                                                                           | Others (duplicate/ no original data used) | Editorial Comment                                                             |
| Babazono 2011        | Do interventions to prevent lifestyle-related diseases reduce healthcare expenditures? A randomized controlled clinical trial                                                                                                       | Combined with primary research            | RCT                                                                           |
| Besstremyannaya 2016 | Differential Effects of Declining Rates in a Per Diem Payment System                                                                                                                                                                | Using published open data                 | DPC data (MHLW)                                                               |
| Chen 2016            | The predictability of eye diseases for Alzheimer's disease                                                                                                                                                                          | Not Japanese population                   | Taiwan                                                                        |
| Chen 2020            | Letter to the Editor Regarding "Treatment Risk for Elderly Patients with Unruptured Cerebral Aneurysm from a Nationwide Database in Japan"                                                                                          | Others (duplicate/ no original data used) | Letter to the Editor                                                          |
| Chen 2021            | Characteristics of interstitial lung disease in patients from post-marketing data on metastatic breast cancer patients who received abemaciclib in Japan                                                                            | Combined with primary research            | questionnaires and/or interviews                                              |
| Chida 2014           | Implementation and evaluation of an efficient secure computation system using 'R' for healthcare statistics                                                                                                                         | Others (duplicate/ no original data used) | dummy insurance claim data (propose a secure statistical analysis system)     |
| Crawford 2013        | Real-world characterization of hypertension patients in japan: A 1-year overview                                                                                                                                                    | Others (duplicate/ no original data used) |                                                                               |
| Disease 2018         | Global, regional, and national incidence, prevalence, and years lived with disability for 354 diseases and injuries for 195 countries and territories, 1990-2017: a systematic analysis for the Global Burden of Disease Study 2017 | Using published open data                 | (Global Burden of Disease Study)                                              |
| Ebihara 2012         | Impact of blunted perception of dyspnea on medical care use and expenditure, and mortality in elderly people                                                                                                                        | Combined with primary research            | Tsurugaya project, a population-based longitudinal study                      |
| Enger 2010           | Comorbidities in patients with persistent or chronic immune thrombocytopenia                                                                                                                                                        | Not Japanese population                   |                                                                               |
| Fujieda 2019         | The effects of the medical economics of prescription inquiries made by pharmacy pharmacists                                                                                                                                         | No health insurance claims data used      | prescription inquiries                                                        |
| Fujii 2016           | Infectious disease during hospitalization is the major causative factor for prolonged hospitalization: multivariate analysis of diagnosis procedure combination (DPC) data of 20,876 cases in Japan                                 | Hospital-based (<10 institutes)           | single-center                                                                 |
| Fujii 2019           | Impact of Body Mass Index of Japanese Gallbladder Cancer Patients on their Postoperative Outcomes                                                                                                                                   | Hospital-based (<10 institutes)           | National Saiseikai Hospital DPC survey                                        |
| Fujita 2019          | Secondhand Smoke and Streptococcal Infection in Young Children Under Japan's Voluntary Tobacco-Free Policy                                                                                                                          | Others (duplicate/ no original data used) | Not available                                                                 |
| Fukai 2020           | Validation of self-reported medication use for hypertension, diabetes, and dyslipidemia among employees of large-sized companies in Japan                                                                                           | Combined with primary research            | web- or paper-based questionnaires                                            |
| Fukuda 2014          | Medical Expenditures Associated With Type 2 Diabetes Mellitus in Japan: A Large Claims Database Study                                                                                                                               | Others (duplicate/ no original data used) |                                                                               |
| Fukuhara 2015        | Geographical analysis of aneurysmal subarachnoid hemorrhage in Japan utilizing publically-accessible DPC database                                                                                                                   | Using published open data                 | DPC data (MHLW)                                                               |
| Fukuhara 2016        | Prefectural difference in spontaneous intracerebral hemorrhage incidence in Japan analyzed with publically accessible diagnosis procedure combination data: possibilities and limitations                                           | Using published open data                 | DPC data (MHLW)                                                               |
| Graham 2020          | Artificial intelligence approaches to predicting and detecting cognitive decline in older adults: A conceptual review                                                                                                               | Review article                            | A Conceptual Review                                                           |
| Grosse 2021          | Identification of congenital CMV cases in administrative databases and implications for monitoring prevalence, healthcare utilization, and costs                                                                                    | Review article                            | review study                                                                  |
| Hamada 2012          | Effects of the per diem prospective payment system with DRG-like grouping system (DPC/PDPS) on resource usage and healthcare quality in Japan                                                                                       | Others (duplicate/ no original data used) | Thesis                                                                        |
| Hamamoto 2019        | Editorial Comment from Dr Hamamoto to Endurological treatment trend of upper urinary urolithiasis in Japan from the Japanese Diagnosis Procedure Combination Database                                                               | Others (duplicate/ no original data used) | Editorial Comment                                                             |
| Hamaya 2021          | Effects of an mHealth App (Kencom) With Integrated Functions for Healthy Lifestyles on Physical Activity Levels and Cardiovascular Risk Biomarkers: Observational Study of 12,602 Users                                             | Combined with primary research            | Mobile health (mHealth) apps                                                  |
| Han 2019             | Increased risk of psoriasis in subjects with abdominal obesity: A nationwide population-based study                                                                                                                                 | Not Japanese population                   | Korean National Health Insurance Service (NHIS) database                      |
| Hashimoto 2012       | Gains in Disability-Free Life Expectancy From Elimination of Diseases and Injuries in Japan                                                                                                                                         | No health insurance claims data used      | Comprehensive Survey of Living Conditions of the People on Health and Welfare |
| Hayashi 2017         | [Expectations of Certified Psychologist in the Clinical Medicine System in Germany for Future Reference]                                                                                                                            | No health insurance claims data used      |                                                                               |
| Hayashi 2020         | Associations between the injustice experience questionnaire and treatment term in                                                                                                                                                   | No health insurance claims data           |                                                                               |
| Hayashida 2013       | Situation Analysis of Emergency Department of the Japanese Acute Care Hospitals                                                                                                                                                     | Combined with primary research            | additional research for emergency care                                        |
| Hayashida 2021       | History and Profile of Diagnosis Procedure Combination (DPC): Development of a Real Data Collection System for Acute Inpatient Care in Japan                                                                                        | Review article                            | Review                                                                        |
| Hern 2015            | US hospital payment adjustments for innovative technology lag behind those in Germany, France, and Japan                                                                                                                            | No health insurance claims data used      | payment systems in US, Germany, France, and Japan                             |
| Higaonna 2019        | Effect of the Partnership Nursing Model on In-hospital Mortality in Japan                                                                                                                                                           | Using published open data                 | DPC data (MHLW)                                                               |

|                |                                                                                                                                                                                                                                                                                                         |                                           |                                                                                  |
|----------------|---------------------------------------------------------------------------------------------------------------------------------------------------------------------------------------------------------------------------------------------------------------------------------------------------------|-------------------------------------------|----------------------------------------------------------------------------------|
| Higaonna 2020  | Association between nursing care delivery models and patients' health outcomes in a university hospital: A retrospective cohort study based on the Diagnostic Procedure Combination database                                                                                                            | Hospital-based (<10 institutes)           | an academic teaching hospital                                                    |
| Higashi 2015   | Measuring the quality of care using a large clinical database: Lessons learned in oncology                                                                                                                                                                                                              | Review article                            | Review                                                                           |
| Hiraoka 2019   | Prediction of Prognosis of Intermediate-Stage HCC Patients: Validation of the Tumor Marker Score in a Nationwide Database in Japan                                                                                                                                                                      | No health insurance claims data used      | a nationwide survey system                                                       |
| Hirose 2020    | A review of studies using the Japanese National Database of Health Insurance Claims and Specific Health Checkups                                                                                                                                                                                        | Review article                            | review study                                                                     |
| Hishida 2016   | Long-term outcome and prognostic factors of surgically treated thymic carcinoma: results of 306 cases from a Japanese Nationwide Database Study                                                                                                                                                         | No health insurance claims data used      | a nationwide database: The Japanese Association for Research of the Thymus(JART) |
| Hung 2018      | Diagnostic consistency and interchangeability of schizophrenic disorders and bipolar disorders: A 7-year follow-up study                                                                                                                                                                                | Not Japanese population                   | Taiwan                                                                           |
| Ie 2017        | Potentially Harmful Medication Use and Decline in Health-Related Quality of Life among Community-Dwelling Older Adults                                                                                                                                                                                  | Not Japanese population                   |                                                                                  |
| Igarashi 2019  | Cost-minimisation model of magnetic resonance-guided focussed ultrasound therapy compared to unilateral deep brain stimulation for essential tremor treatment in Japan                                                                                                                                  | Using published open data                 | data from published sources and expert clinical opinion                          |
| Iihara 2013    | Issues in acute stroke care systems in Japan with a special emphasis on implementation of comprehensive stroke centers                                                                                                                                                                                  | Review article                            | Review                                                                           |
| Ikawa 2020     | In Reply to Letter to the Editor Regarding "Treatment Risk for Elderly Patients with Unruptured Cerebral Aneurysm from a Nationwide Database in Japan"                                                                                                                                                  | Others (duplicate/ no original data used) | Letter                                                                           |
| Inagaki 2014   | [Metabolic and lithium monitoring in Japanese psychiatric outpatient clinics]                                                                                                                                                                                                                           | Duplicates                                | Duplicate (稲垣 2014)                                                              |
| Inoue 2016     | [Psychotropic Prescribing Practices for Children and Adolescents with Intellectual Disabilities: A Cohort Study Using a Large-scale Health Insurance Database]                                                                                                                                          | Duplicates                                | Duplicate (井上 2016)                                                              |
| Inoue 2017     | Regional Variation in the Use of Percutaneous Coronary Intervention in Japan                                                                                                                                                                                                                            | Using published open data                 | DPC summary tables (MHLW)                                                        |
| Inoue 2019     | [Factors related to life expectancy in prefectures: An ecological study using the National Database]                                                                                                                                                                                                    | No health insurance claims data used      | Health checkup data                                                              |
| Inoue 2019     | Regional variance in patterns of prescriptions for chronic kidney disease in Japan                                                                                                                                                                                                                      | Using published open data                 | NDB Open data                                                                    |
| Inoue 2021     | Regional variation in the use of catheter ablation for patients with arrhythmia in Japan                                                                                                                                                                                                                | Using published open data                 | DPC data (MHLW)                                                                  |
| Ishii 2012     | DRG/PPS and DPC/PDPS as Prospective Payment Systems                                                                                                                                                                                                                                                     | Review article                            | Review                                                                           |
| Ishikawa 2016  | Medical Big Data for Research Use: Current Status and Related Issues                                                                                                                                                                                                                                    | Review article                            | Conferences and Lectures                                                         |
| Ishimaru 2019  | Domiciliary dental care among homebound older adults: A nested case-control study in Japan                                                                                                                                                                                                              | No health insurance claims data used      | LTC insurance claims database and the Survey of Medical Institutions in Japan    |
| Isobe 2020     | Correlation between the number of laparoscopy-qualified gynecologists and the proportion of laparoscopic surgeries for benign gynecological diseases in Japan: An ecological study                                                                                                                      | Using published open data                 | NDB Open data                                                                    |
| Isobe 2020     | The number of overall hysterectomies per population with the perimenopausal status is increasing in Japan: A national representative cohort study                                                                                                                                                       | Using published open data                 | NDB Open data                                                                    |
| Isumi 2020     | Assessment of Additional Medical Costs Among Older Adults in Japan With a History of Childhood Maltreatment                                                                                                                                                                                             | Combined with primary research            | the Japan Gerontological Evaluation Study (JAGES)                                |
| Itoh 2019      | National burden of the pharmaceutical cost of wet compresses and its cost predictors: nationwide cross-sectional study in Japan                                                                                                                                                                         | Using published open data                 | NDB Open data                                                                    |
| Iwasaki 2017   | Association between tooth loss and medical costs related to stroke in healthy older adults aged over 75 years in Japan                                                                                                                                                                                  | Combined with primary research            | Niigata Study (a prospective community-based study)                              |
| Jamotte 2014   | Treatment Patterns and Health Care Costs in Patients with Schizophrenia Initiating with First- or Second-Generation Antipsychotic: Results from a Japanese Claims Database Analysis                                                                                                                     | Others (duplicate/ no original data used) |                                                                                  |
| Jamotte 2014   | Treatment Patterns and Health Care Costs in Patients with Depression Treated with Antidepressant only or Combined with Benzodiazepine: Results From a Japanese Claims Database Analysis                                                                                                                 | Others (duplicate/ no original data used) |                                                                                  |
| Jingushi 2021  | Low-intensity pulsed ultrasound is frequently used to treat fractures after osteosynthesis in elderly patients: A study using open data from the national database of health insurance claims of Japan                                                                                                  | Using published open data                 | NDB Open data                                                                    |
| Kamata 2018    | Wide difference in biologics usage and expenditure for the treatment of patients with rheumatoid arthritis in each prefecture in Japan analyzed using "National Database of Health Insurance Claims and Specific Health Checkups of Japan"                                                              | Using published open data                 | NDB Open data                                                                    |
| Kamata 2019    | Status quo of osteoporosis treatment in Japan disclosed by the National Database of Health Insurance Claims and Specific Health Checkups: too late in treatment initiation and too few in treated patients?                                                                                             | Using published open data                 | NDB Open data                                                                    |
| Kamijo 2014    | Cost information of chemotherapy for cervical and endometrial cancer in Japan                                                                                                                                                                                                                           | Hospital-based (<10 institutes)           | a specialized cancer hospital                                                    |
| Kaneko 2020    | Medical and Dental Visits of Chronic Kidney Disease-Diagnosed Participants Analyzed From the Specific Health Checkups Results in Japan: TAMA MED Project-CKD                                                                                                                                            | Combined with primary research            | questionnaire (TAMA MED Project-CKD)                                             |
| Kanzaki 2020   | Improvement of diagnostic accuracy of Parkinson's disease on I-123-ioflupane single photon emission computed tomography (123I FP-CIT SPECT) using new Japanese normal database                                                                                                                          | No health insurance claims data used      | Japanese normal database (NDB)                                                   |
| Karimian 2020  | A commentary on the article: Comparison of outcomes after differentiated thyroid cancer surgery performed with and without energy devices: A population-based cohort study using a nationwide database in Japan, Int. J. Surg. 2020 Apr 9, doi: 10.1016/j.ijssu.2020.03.072, pii: S1743-9191(20)30286-7 | Others (duplicate/ no original data used) | Invited Commentary                                                               |
| Kashiwagi 2013 | Factors associated with the use of home-visit nursing services covered by the long-term care insurance in rural Japan: a cross-sectional study                                                                                                                                                          | No health insurance claims data used      | long-term care insurance                                                         |
| Katano 2018    | Trends in isolated meniscus repair and meniscectomy in Japan, 2011-2016                                                                                                                                                                                                                                 | Using published open data                 | NDB Open data                                                                    |
| Katano 2020    | Trends in arthroplasty in Japan by a complete survey, 2014-2017                                                                                                                                                                                                                                         | Using published open data                 | NDB Open data                                                                    |
| Kataoka 2019   | Scholarly Activity Support Systems in Internal Medicine Residency Programs: A National Representative Survey in Japan                                                                                                                                                                                   | Combined with primary research            | web questionnaire                                                                |
| Kato 2016      | Consequences of an Early PSA Response to Enzalutamide Treatment for Japanese Patients with Metastatic Castration-resistant Prostate Cancer                                                                                                                                                              | No health insurance claims data used      |                                                                                  |

|                |                                                                                                                                                                                                    |                                           |                                                                                        |
|----------------|----------------------------------------------------------------------------------------------------------------------------------------------------------------------------------------------------|-------------------------------------------|----------------------------------------------------------------------------------------|
| Kato 2017      | Comparative economic evaluation of home-based and hospital-based palliative care for terminal cancer patients                                                                                      | Hospital-based (<10 institutes)           | Nikko Memorial Hospital and Motowanishi Family Clinic in Muroran city, Hokkaido, Japan |
| Kato 2017      | History of the secondary use of national database of health insurance claims and specific health checkups of Japan(NDB)                                                                            | Review article                            | Review                                                                                 |
| Kawahara 2020  | A high neutrophil-to-lymphocyte ratio is a poor prognostic factor for castration-resistant prostate cancer patients who undergo abiraterone acetate or enzalutamide treatment                      | No health insurance claims data used      |                                                                                        |
| Kimura 2011    | Pharmacovigilance systems and databases in Korea, Japan, and Taiwan                                                                                                                                | Review article                            | Review                                                                                 |
| Kimura 2020    | Cardiovascular and cerebrovascular diseases risk associated with the incidence of presenteeism and the costs of presenteeism                                                                       | Combined with primary research            | self-administered questionnaire about presenteeism and absenteeism                     |
| Kinosada 2016  | [Utilization of Big Data in Medicine and Future Outlook]                                                                                                                                           | Using published open data                 | DPC data (MHLW)                                                                        |
| Kinoshita 2014 | A Retrospective, Hospital-Based Study to Determine the Incidence of Rotavirus Hospitalizations among Children Less than 5 Years of Age over a 10-Year Period(2001-2011) in Akita Prefecture, Japan | Hospital-based (<10 institutes)           | Yuri-Kumiai General Hospital                                                           |
| Kinoshita 2021 | Cost-effectiveness of a hybrid emergency room system for severe trauma: a health technology assessment from the perspective of the third-party payer in Japan                                      | Hospital-based (<10 institutes)           | a tertiary care hospital                                                               |
| Kobayashi 2020 | Sequential Use of Androgen Receptor Axis-targeted Agents in Chemotherapy-naive Castration-resistant Prostate Cancer: A Multicenter Retrospective Analysis With 3-Year Follow-up                    | No health insurance claims data used      |                                                                                        |
| Kodama 2019    | Construction of a Heart Failure Database Collating Administrative Claims Data and Electronic Medical Record Data to Evaluate Risk Factors for In-Hospital Death and Prolonged Hospitalization      | Hospital-based (<10 institutes)           | 3 hospitals                                                                            |
| Kohsaka 2021   | Current trends in diabetes mellitus database research in Japan                                                                                                                                     | Review article                            | Review                                                                                 |
| Kon 2018       | Association between renal function and cardiovascular and all-cause mortality in the community-based elderly population: results from the Specific Health Check and Guidance Program in Japan      | No health insurance claims data used      | Specific Health Check and Guidance Program                                             |
| Konno 2015     | Moderately increased albuminuria is an independent risk factor of cardiovascular events in the general Japanese population under 75 years of age: the Watari study                                 | Combined with primary research            | Watari study (a community-based prospective cohort study)                              |
| Konta 2020     | Association between serum uric acid levels and mortality: a nationwide community-based cohort study                                                                                                | No health insurance claims data used      | Specific Health Checkup                                                                |
| Koram 2019     | Validation studies of claims data in the Asia-Pacific region: A comprehensive review                                                                                                               | Review article                            | review study                                                                           |
| Koyama 2017    | Patterns of CT use in Japan, 2014: A nationwide cross-sectional study                                                                                                                              | Using published open data                 | NDB Open data                                                                          |
| Koyama 2018    | Trends in the medication reviews of community pharmacies in Japan: a nationwide retrospective study                                                                                                | Using published open data                 | Survey of medical care activities in public health insurance (MHLW)                    |
| Kubo 2011      | [Practical use of DPC information for occupational health consultation]                                                                                                                            | Using published open data                 | DPC data (MHLW)                                                                        |
| Kumamaru 2018  | Global and Japanese regional variations in radiologist potential workload for computed tomography and magnetic resonance imaging examinations                                                      | Using published open data                 | NDB Open data                                                                          |
| Kuniyoshi 2021 | Regional variation in the development of neonatal hyperbilirubinemia and relation with sunshine duration in Japan: an ecological study                                                             | Using published open data                 | NDB Open data                                                                          |
| Kurasawa 2020  | Pneumonia prevention effects of perioperative oral management in approximately 25,000 patients following cancer surgery                                                                            | Hospital-based (<10 institutes)           | eight regional central hospitals                                                       |
| Kurita 2017    | A phase I/II trial of intrabone marrow cord blood transplantation and comparison of the hematological recovery with the Japanese nationwide database                                               | No health insurance claims data used      | a phase I/II prospective single-center trial                                           |
| Kurita 2018    | Association among(Nursery) School Absenteeism Surveillance System and Incidence of Infectious Diseases                                                                                             | Using published open data                 | used published NDB data                                                                |
| Kuriyama 2014  | [Analysis of cancer treatment in Iwate Prefecture - an analysis of health care regions based on MHLW DPC data]                                                                                     | Using published open data                 | DPC data (MHLW)                                                                        |
| Kuroiwa 2010   | [Economic basis for neurologic services and the system for health insurance: diagnosis procedure combinations and insurance scores of neurophysiological tests]                                    | Review article                            | Symposium Review                                                                       |
| Kurosaki 2020  | [Medical expenses for diabetes care in Japan: Analysis of inter-prefecture differences]                                                                                                            | Using published open data                 | NDB Open data                                                                          |
| Kusama 2020    | Obstacles to antimicrobial use surveillance using claims data in elderly care facilities in Japan                                                                                                  | Review article                            | Review                                                                                 |
| Kuwabara 2016  | Behavior modification stages of attendance at specific health check-ups and relevant knowledge, attitudes, and behaviors in one municipal insurance representation                                 | No health insurance claims data used      | self-administered questionnaire                                                        |
| Lai 2015       | Databases in the Asia-pacific region: The potential for a distributed network approach                                                                                                             | Review article                            | characteristics of databases in Asian-pacific countries                                |
| Lin 2017       | Survival analysis of increases in care needs associated with dementia and living alone among older long-term care service users in Japan                                                           | No health insurance claims data used      | LTC insurance claims dataset                                                           |
| Liu 2010       | Use of benzodiazepines, hypnotics, and anxiolytics in major depressive disorder: Association with chronic pain diseases                                                                            | Not Japanese population                   | US                                                                                     |
| Liu 2021       | Effect of Care Rehabilitation on Medical Expenses, Care Costs, and Total Costs of Elderly Individuals with Parkinson's Disease                                                                     | Others (duplicate/ no original data used) | Not available                                                                          |
| Lkhagva 2013   | Does co-payment rate influence the relationship between monthly salary and health care service demand among the insured of health insurance societies in Japan?                                    | Using published open data                 | National Federation of Health Insurance Societies; Annual Report                       |
| Matsuda 2016   | Hospitals and Big Data: Use of Case Mix and E-claim Data in Japan                                                                                                                                  | Review article                            | Review                                                                                 |
| Matsuda 2016   | Development of Case Mix Based Evaluation System in Japan                                                                                                                                           | Review article                            | Review                                                                                 |
| Matsuda 2019   | Health Policy in Japan - Current Situation and Future Challenges                                                                                                                                   | Review article                            | Review                                                                                 |
| Matsumoto 2013 | DPC in acute-phase inpatient hospital care. Visualization of amount of nursing care provided and accessibility to nursing care                                                                     | Hospital-based (<10 institutes)           | a university hospital                                                                  |
| Matsumoto 2020 | Validity Assessment of Self-reported Medication Use for Hypertension, Diabetes, and Dyslipidemia in a Pharmacoepidemiologic Study by Comparison With Health Insurance Claims                       | Combined with primary research            | Tsuruoka Metabolomics Cohort Study                                                     |
| Matsutani 2018 | Pregabalin as an analgesic option for patients undergoing thoracotomy: cost analysis of pregabalin versus epidural analgesia for post-thoracotomy pain relief                                      | Hospital-based (<10 institutes)           | Teikyo University Hospital (RCT)                                                       |
| Mihara 2020    | Factors correlated with drug use for constipation: perspectives from the 2016 open Japanese National Database                                                                                      | Using published open data                 | NDB Open data                                                                          |
| Milea 2015     | A review of accessibility of administrative healthcare databases in the Asia-Pacific region                                                                                                        | Review article                            | review study                                                                           |

|                |                                                                                                                                                                                                                                             |                                           |                                                                                |
|----------------|---------------------------------------------------------------------------------------------------------------------------------------------------------------------------------------------------------------------------------------------|-------------------------------------------|--------------------------------------------------------------------------------|
| Mitsutake 2021 | Influence of co-existing social isolation and homebound status on medical care utilization and expenditure among older adults in Japan                                                                                                      | Combined with primary research            | (+Postal surveys on social isolation and homebound status)                     |
| Miyamoto 2017  | Integration of DPC and clinical microbiological data in Japan reveals importance of confirming a negative follow-up blood culture in patients with MRSA bacteremia                                                                          | Hospital-based (<10 institutes)           | Kurume University Hospital                                                     |
| Miyamoto 2021  | Effect of tranexamic acid in patients with colonic diverticular bleeding: A nationwide inpatient database study                                                                                                                             | Duplicates                                | Duplicate (Miyamoto 2020)                                                      |
| Miyazaki 2021  | Correction to: Real-World Prescription Pattern and Healthcare Cost Among Patients with Ulcerative Colitis in Japan: A Retrospective Claims Data Analysis                                                                                    | Others (duplicate/ no original data used) | Correction                                                                     |
| Mizuno 2015    | Surgical management of recurrent thymic epithelial tumors: a retrospective analysis based on the Japanese nationwide database                                                                                                               | No health insurance claims data used      | nationwide registry study of thymic epithelial tumors                          |
| Momo 2021      | Development and application for drug-safety and efficacy using a large claims data                                                                                                                                                          | Review article                            | Symposium Review                                                               |
| Mori 2019      | Correction to: Estimated expenditures for hip fractures using merged healthcare insurance data for individuals aged $\geq$ 75 years and long-term care insurance claims data in Japan                                                       | Others (duplicate/ no original data used) | Correction                                                                     |
| Mori 2019      | Influence of seasonal changes on disease activity and distribution of affected joints in rheumatoid arthritis                                                                                                                               | No health insurance claims data used      | a nationwide RA database                                                       |
| Mori 2020      | The Impact of Diabetes Status on Presenteeism in Japan                                                                                                                                                                                      | Combined with primary research            | questionnaire survey                                                           |
| Morii 2019     | Projecting future supply and demand for physical therapists in Japan using system dynamics                                                                                                                                                  | Using published open data                 | NDB Open data                                                                  |
| Morimae 2012   | Cost disparity between open repair and endovascular aneurysm repair for abdominal aortic aneurysm: a single-institute experience in Japan                                                                                                   | Hospital-based (<10 institutes)           | Single-center                                                                  |
| Morishima 2013 | Burden of household environmental tobacco smoke on medical expenditure for Japanese women: a population-based cohort study                                                                                                                  | Combined with primary research            | Ohsaki Cohort Study                                                            |
| Morishima 2019 | Impact of Comorbidities on Survival in Gastric, Colorectal, and Lung Cancer Patients                                                                                                                                                        | Hospital-based (<10 institutes)           | at the five subject hospitals                                                  |
| Morita 2018    | Factors Affecting Discharge to Home of Geriatric Intermediate Care Facility Residents in Japan                                                                                                                                              | No health insurance claims data used      | National LTC Insurance Claim Database                                          |
| Morita 2019    | Authors' Reply to Cerejeira: "Association of Early Systemic Corticosteroid Therapy with Mortality in Patients with Stevens-Johnson Syndrome or Toxic Epidermal Necrolysis: A Retrospective Cohort Study Using a Nationwide Claims Database" | Others (duplicate/ no original data used) | Authors' Reply                                                                 |
| Mukai 2020     | Trends Associated with Hemorrhoids in Japan: Data Mining of Medical Information Datasets and the National Database of Health Insurance Claims and Specific Health Checkups of Japan (NDB) Open Data Japan                                   | Using published open data                 | NDB Open data                                                                  |
| Murakami 2015  | Ecological Analysis of Factors Associated with Mortality of Cerebral Infarction in Japan                                                                                                                                                    | Using published open data                 | opened results of first research attempt to apply the NDB for planning of RHCP |
| Murata 2012    | [Preoperative antimicrobial therapy for patients with cholecystectomy for acute cholecystitis based on the administrative database associated with the Diagnosis Procedure Combination system]                                              | Duplicates                                | Duplicate (村田2012)                                                             |
| Murata 2014    | Claims Database Analysis Of Patients With Chronic Hepatitis C In Japan                                                                                                                                                                      | Others (duplicate/ no original data used) |                                                                                |
| Murata 2015    | Circumstance of endoscopic and laparoscopic treatments for gastric cancer in Japan: A review of epidemiological studies using a national administrative database                                                                            | Review article                            | A review                                                                       |
| Mushiroda 2018 | Association of HLA-A*31:01 Screening With the Incidence of Carbamazepine-Induced Cutaneous Adverse Reactions in a Japanese Population                                                                                                       | Combined with primary research            | genetic screening                                                              |
| Nagai 2020     | Data resource profile: JMDC claims databases sourced from Medical Institutions                                                                                                                                                              | Review article                            | Data resource profile                                                          |
| Nagakura 2021  | The Significant Association between Health Examination Results and Population Health: A Cross-Sectional Ecological Study Using a Nation-Wide Health Checkup Database in Japan                                                               | No health insurance claims data used      | Health Checkup Database                                                        |
| Nagata 2018    | Total Health-Related Costs Due to Absenteeism, Presenteeism, and Medical and Pharmaceutical Expenses in Japanese Employers                                                                                                                  | Combined with primary research            | self-administered questionnaire                                                |
| Nagata 2020    | Work functioning impairment in the course of pharmacotherapy treatment for depression                                                                                                                                                       | Combined with primary research            | using a questionnaire                                                          |
| Nakagawa 2011  | A new accounting system for financial balance based on personnel cost after the introduction of a DPC/DRG system                                                                                                                            | Hospital-based (<10 institutes)           | Single-center                                                                  |
| Nakagoe 2015   | Surgical risk model for acute diffuse peritonitis based on a Japanese nationwide database: an initial report on the surgical and 30-day mortality                                                                                           | No health insurance claims data used      | National Clinical Database                                                     |
| Nakagoe 2015   | Erratum to: Surgical risk model for acute diffuse peritonitis based on a Japanese nationwide database: an initial report on the surgical and 30-day mortality                                                                               | Others (duplicate/ no original data used) | NCD, erratum                                                                   |
| Nakai 2018     | Response to flutamide, as second-line therapy after bicalutamide, predicts efficacy of abiraterone, not that of enzalutamide                                                                                                                | No health insurance claims data used      | at Nara Medical University Hospital                                            |
| Nakajima 2015  | [Examination of the Difference in Medical Treatment Contents According to Major Diagnostic Category of Hospital Group I and Group II Using the Diagnosis Procedure Combination Survey Data]                                                 | Using published open data                 | DPC data (MHLW)                                                                |
| Nakajima 2015  | Examination of diagnosis procedure combination survey data that influence function evaluation coefficient II                                                                                                                                | Using published open data                 | DPC data (MHLW)                                                                |
| Nakajima 2016  | Type Classification Based on Inpatient Ratio According to Major Diagnostic Category of Group III in the Diagnosis Procedure Combination System                                                                                              | Using published open data                 | DPC data (MHLW)                                                                |
| Nakajima 2017  | Examination of Factors that Influence the Operation Income and Expenditure Balance Difference Rate of 20 Educational Foundation Universities                                                                                                | Using published open data                 | DPC data (MHLW)                                                                |
| Nakakita 2021  | Standard table direct anterior approach within an early discharge protocol for cementless total hip arthroplasty: experience from a Japanese hospital                                                                                       | Hospital-based (<10 institutes)           | single-center                                                                  |
| Nakamura 2016  | Diagnosis Procedure Combination Database Would Develop Nationwide Clinical Research in Japan                                                                                                                                                | Review article                            | Review                                                                         |
| Nakao 2020     | Trends and outcomes of blunt renal trauma management: a nationwide cohort study in Japan                                                                                                                                                    | No health insurance claims data used      | the Japan Trauma Data Bank (JTDB)                                              |
| Nakashima 2021 | Impact of Enteral Nutrition Within 24 Hours Versus Between 24 and 48 Hours in Patients With Severe Acute Pancreatitis: A Multicenter Retrospective Study                                                                                    | No health insurance claims data used      | a multi-center cohort study                                                    |
| Nakayama 2012  | [Approaching the "evidence-practice gap" in pharmaceutical risk management: analysis of healthcare claim data]                                                                                                                              | Review article                            | Review                                                                         |

|                |                                                                                                                                                                                                                                               |                                           |                                                              |
|----------------|-----------------------------------------------------------------------------------------------------------------------------------------------------------------------------------------------------------------------------------------------|-------------------------------------------|--------------------------------------------------------------|
| Nakayama 2017  | Analysis of the evidence-practice gap to facilitate proper medical care for the elderly: investigation, using databases, of utilization measures for National Database of Health Insurance Claims and Specific Health Checkups of Japan (NDB) | Others (duplicate/ no original data used) | study protocol                                               |
| Nishi 2016     | Effects of Eating Fast and Eating Before Bedtime on the Development of Nonalcoholic Fatty Liver Disease                                                                                                                                       | Others (duplicate/ no original data used) | Not available                                                |
| Nishi 2020     | Regional variance in the use of urine dipstick test for outpatients in Japan                                                                                                                                                                  | Using published open data                 | NDB Open data                                                |
| Nishigori 2015 | [Review of the health technology assessment on surgeries in Japan]                                                                                                                                                                            | Review article                            | Review                                                       |
| Nishikawa 2021 | Prognostic Effect of Incidental Pulmonary Embolism on Long-Term Mortality in Cancer Patients                                                                                                                                                  | Hospital-based (<10 institutes)           | single-center                                                |
| Nishimura 2015 | Big data visualization of acute stroke care practices using a nationwide neurosurgeon survey                                                                                                                                                  | Review article                            | Review                                                       |
| Nishimura 2016 | Status and Future Perspectives of Utilizing Big Data in Neurosurgical and Stroke Research                                                                                                                                                     | Review article                            | Review                                                       |
| Nishimura 2020 | Role of comprehensive stroke centers in stroke care                                                                                                                                                                                           | Review article                            | Review                                                       |
| Niu 2012       | C-reactive protein (CRP) is a predictor of high medical-care expenditures in a community-based elderly population aged 70 years and over: The Tsurugaya project                                                                               | Combined with primary research            | Tsurugaya project, a population-based longitudinal study     |
| Noguchi 2020   | Japan Trial in High-Risk Individuals to Enhance Their Referral to Physicians (J-HARP)-A Nurse-Led, Community-Based Prevention Program of Lifestyle-Related Disease                                                                            | Combined with primary research            | a clustered randomized controlled trial                      |
| Nonaka 2018    | Incidence of aspiration pneumonia during hospitalization in Japanese hospitalized cases did not increase whereas concern factors were exacerbated in a time-dependent manner: analysis of Diagnosis Procedure Combination (DPC) data          | Hospital-based (<10 institutes)           | Saga University Hospital                                     |
| Nonaka 2018    | A Cost-benefit Analysis of Percutaneous Coronary Intervention and Coronary Artery Bypass Grafting using Reimbursement Data of Japan: A Single-center Pilot Study                                                                              | Hospital-based (<10 institutes)           | Saga University Hospital                                     |
| Nordstrom 2020 | Incidence of venous thromboembolism among postmenopausal women prescribed ospemifene, selective estrogen receptor modulators for noncancer indications, or untreated vulvar and vaginal atrophy                                               | Not Japanese population                   |                                                              |
| Obara 2021     | [Study on the Safety of Perinatal Medication]                                                                                                                                                                                                 | Review article                            | Review                                                       |
| Obata 2020     | The clinical usage of liposomal amphotericin B in patients receiving renal replacement therapy in Japan: a nationwide observational study                                                                                                     | Duplicates                                | Duplicate (Obata 2021)                                       |
| Okada 2021     | Big data and real-world data-based medicine in the management of hypertension                                                                                                                                                                 | Review article                            | Review                                                       |
| Okamoto 2010   | Declining accuracy in disease classification on health insurance claims: should we reconsider classification by principal diagnosis?                                                                                                          | Using published open data                 | National Health Insurance Medical Benefit Survey (NHIMBS)    |
| Okamoto 2013   | Qualitative evaluation of the supporting system for diagnosis procedure combination code selection                                                                                                                                            | No health insurance claims data used      | Qualitative Evaluation                                       |
| Okamoto 2014   | Linkage rate between data from health checks and health insurance claims in the Japan National Database                                                                                                                                       | Using published open data                 | Four publicly available datasets                             |
| Okawara 2020   | Association between the course of hypnotics treatment for insomnia and work functioning impairment in Japanese workers                                                                                                                        | Combined with primary research            | a questionnaire survey                                       |
| Okui 2021      | An Age-Period-Cohort Analysis of Prevalence and Consultation Rate for Dyslipidemia in Japan                                                                                                                                                   | Using published open data                 | NDB Open data                                                |
| Okumura 2014   | [Trends of psychotropic medication use among children and adolescents in Japan data from the national insurance claims database between 2002 and 2010]                                                                                        | Duplicates                                | Duplicate (奥村 2014)                                          |
| Okumura 2015   | Trends in use of psychotropic medications among patients treated with cholinesterase inhibitors in Japan from 2002 to 2010                                                                                                                    | Using published open data                 | Survey of Medical Care Activities in Public Health Insurance |
| Ono 2019       | Impact of care coordination on oral anticoagulant therapy among patients with atrial fibrillation in routine clinical practice in Japan: a prospective, observational study                                                                   | Combined with primary research            | a multi-center, single-arm, prospective cohort study         |
| Onoue 2018     | Trends in Polypharmacy in Japan: A Nationwide Retrospective Study                                                                                                                                                                             | Using published open data                 | Survey of Medical Care Activities in Public Health Insurance |
| Otaki 2017     | Analysis of Closed Claims in the Clinical Management of Rheumatoid Arthritis in Japan                                                                                                                                                         | No health insurance claims data used      | Closed claims                                                |
| Otsuki 2021    | Characteristics and Burden of Diagnostic Error-Related Malpractice Claims in Neurosurgery                                                                                                                                                     | No health insurance claims data used      | malpractice claims database                                  |
| Ozaki 2019     | Quality of primary care provided in community clinics in Japan                                                                                                                                                                                | No health insurance claims data used      | medical chart review                                         |
| Ryu 2011       | The benchmark analysis of gastric, colorectal and rectal cancer pathways: toward establishing standardized clinical pathway in the cancer care                                                                                                | Hospital-based (<10 institutes)           | five participating cancer centers                            |
| Sado 2016      | Socio-environmental factors associated with diabetes mellitus among patients hospitalized with schizophrenia in Japan                                                                                                                         | Hospital-based (<10 institutes)           | single-center                                                |
| Saito 2010     | Copayment level and drug switching: Findings for type 2 diabetes                                                                                                                                                                              | Not Japanese population                   |                                                              |
| Saito 2011     | Hospice care and survival among elderly patients with lung cancer                                                                                                                                                                             | Not Japanese population                   |                                                              |
| Sakai 2013     | [DPC data based situation analysis of Regional Core Hospital: an application of the GIS Methodology for Regional Health Care Plans]                                                                                                           | Hospital-based (<10 institutes)           | Single-center                                                |
| Sakai 2013     | [Evaluation of the application of the clinical pathway using Diagnosis Procedure Combination (DPC) data]                                                                                                                                      | Hospital-based (<10 institutes)           | single-center                                                |
| Sakamoto 2019  | Editorial Comment from Dr Sakamoto to Endurological treatment trend of upper urinary urolithiasis in Japan from the Japanese Diagnosis Procedure Combination Database                                                                         | Others (duplicate/ no original data used) | Editorial comment                                            |
| Sakata 2020    | A Study on the Status of Proton Pump Inhibitor Prescriptions Using Diagnosis Procedure Combination Data in Japan                                                                                                                              | Hospital-based (<10 institutes)           | single-center                                                |
| Saokaew 2015   | Healthcare databases in Thailand and Japan: Potential sources for health technology assessment research                                                                                                                                       | Review article                            | review study                                                 |
| Sasaki 2019    | Does hospital information technology infrastructure promote the implementation of clinical practice guidelines? A multicentre observational study of Japanese hospitals                                                                       | Combined with primary research            | questionnaire survey                                         |
| Sato 2015      | Significance of estimated glomerular filtration rate in predicting brain or heart attacks in obese and non-obese populations                                                                                                                  | No health insurance claims data used      | Specific Health Checkup database                             |
| Sato 2016      | Association between periodontitis and medical expenditure in older adults: A 33-month follow-up study                                                                                                                                         | Combined with primary research            | Niigata Study (a prospective community-based study)          |
| Sato 2018      | Estimation of total prescription weights of active pharmaceutical ingredients in human medicines based on a public database for environmental risk assessment in Japan                                                                        | Using published open data                 | NDB Open data                                                |



|                 |                                                                                                                                                                                                                                                          |                                           |                                                                                     |
|-----------------|----------------------------------------------------------------------------------------------------------------------------------------------------------------------------------------------------------------------------------------------------------|-------------------------------------------|-------------------------------------------------------------------------------------|
| Sato 2019       | Novel Analytics Framework for Universal Healthcare Insurance Database                                                                                                                                                                                    | Using published open data                 | based on the results of previous analyses                                           |
| Sato 2019       | Novel Analytics Framework for Universal Healthcare Insurance Claims Database                                                                                                                                                                             | No health insurance claims data used      | Case Study                                                                          |
| Sato 2021       | Disproportionality by sex in the prescription of drugs capable of inducing parkinsonism for the elderly: A survey using statistics of Japanese national health claims from 2014 to 2017                                                                  | Using published open data                 | NDB Open data                                                                       |
| Sekimoto 2010   | Risk-adjusted assessment of incidence and quantity of blood use in acute-care hospitals in Japan: an analysis using administrative data                                                                                                                  | Hospital-based (<10 institutes)           | two hospitals                                                                       |
| Shibahashi 2021 | Derivation and validation of a quantitative screening model for blunt cerebrovascular injury                                                                                                                                                             | No health insurance claims data used      | Japan Trauma database                                                               |
| Shibata 2019    | Correction to: Influenza vaccination effectiveness for people aged under 65 years in Japan, 2013/ 2014 season: application of a doubly robust method to a large-scale, real-world dataset                                                                | Others (duplicate/ no original data used) | Correction                                                                          |
| Shida 2010      | [Image examination of malignant tumors in lungs observed on the basis of cost analysis using diagnosis procedure combination data]                                                                                                                       | Hospital-based (<10 institutes)           | Single-center                                                                       |
| Shikamura 2012  | [Medical economics research on awareness of community pharmacists about raising pharmaceutical questions regarding prescriptions issued by physicians]                                                                                                   | Combined with primary research            | surveying the actual condition of pharmaceutical inquiries                          |
| Shimazaki 2020  | Association between dental consultation and oral health status among male Japanese employees                                                                                                                                                             | Others (duplicate/ no original data used) | a company                                                                           |
| Shiratori 2021  | Association between the chronic use of gastric acid suppressants and high-risk colorectal polyps                                                                                                                                                         | Hospital-based (<10 institutes)           | nine high-volume hospitals                                                          |
| Shiroiwa 2014   | Treatment Costs for Breast Cancer in Japan: Large Claim Database Analysis                                                                                                                                                                                | Others (duplicate/ no original data used) | Abstract                                                                            |
| Shiroiwa 2017   | Cost-effectiveness analysis of the introduction of S-1 therapy for first-line metastatic breast cancer treatment in Japan: results from the randomized phase III SELECT BC trial                                                                         | Combined with primary research            | (expected cost was calculated using patient-level claim data)                       |
| Shoji 2011      | Assessing a Clinical Pathway to Improve the Quality of Care in Pulmonary Resections                                                                                                                                                                      | Hospital-based (<10 institutes)           | single-center                                                                       |
| Sugawara 2020   | Association of moderately abnormal behavior and administered neuraminidase inhibitors                                                                                                                                                                    | Using published open data                 | NDB Open data                                                                       |
| Sugihara 2019   | Regional clinical practice variation in urology: Usage example of the Open Data of the National Database of Health Insurance Claims and Specific Health Checkups of Japan                                                                                | Using published open data                 | NDB Open data                                                                       |
| Sugisaki 2018   | Correction to: A case-control study of the risk of upper gastrointestinal mucosal injuries in patients prescribed concurrent NSAIDs and antithrombotic drugs based on data from the Japanese national claims database of 13 million accumulated patients | Others (duplicate/ no original data used) | correction                                                                          |
| Suzuki 2010     | Auto-selection of DRG codes from discharge summaries by text mining in several hospitals: analysis of difference of discharge summaries                                                                                                                  | Hospital-based (<10 institutes)           | three Hospitals                                                                     |
| Takaku 2017     | Do benefits in kind or refunds affect health service utilization and health outcomes? A natural experiment from Japan                                                                                                                                    | No health insurance claims data used      |                                                                                     |
| Takatori 2019   | Impaired activity of daily living is a risk factor for high medical cost in patients of non-variceal upper gastrointestinal bleeding                                                                                                                     | Hospital-based (<10 institutes)           | Single-center                                                                       |
| Takayama 2017   | A Cost-Utility Analysis of Endovascular Aneurysm Repair for Abdominal Aortic Aneurysm                                                                                                                                                                    | Hospital-based (<10 institutes)           | Ibaraki Prefectural Central Hospital                                                |
| Takeda 2017     | The current situation and issues of the secondary use of electronic medical record data                                                                                                                                                                  | No health insurance claims data used      | electronic medical record data                                                      |
| Takeda 2020     | Correction to: Prophylactic sivelestat for esophagectomy and in-hospital mortality: a propensity score-matched analysis of claims database                                                                                                               | Others (duplicate/ no original data used) | Correction                                                                          |
| Takeuchi 2014   | A risk model for esophagectomy using data of 5354 patients included in a Japanese nationwide web-based database                                                                                                                                          | No health insurance claims data used      | National Clinical Database (NCD)                                                    |
| Takeuchi 2017   | Comparison of Short-Term Outcomes Between Open and Minimally Invasive Esophagectomy for Esophageal Cancer Using a Nationwide Database in Japan                                                                                                           | No health insurance claims data used      | NCD                                                                                 |
| Takeuchi 2018   | Association between Hemoglobin and Hemoglobin A1c: A Data-Driven Analysis of Health Checkup Data in Japan                                                                                                                                                | No health insurance claims data used      | Health Checkup Data                                                                 |
| Takura 2010     | [Study on medical economic evaluation methods for metastatic brain tumors therapy]                                                                                                                                                                       | Combined with primary research            | QOL assessment (EQ-5D, SF-36)                                                       |
| Takura 2019     | Health Economics - Effect of Electronic Medical Record Systems on Cardiovascular Disease Outpatient Consultation Time                                                                                                                                    | Combined with primary research            | Electronic Medical Record Systems                                                   |
| Takusari 2021   | Trends in Hip Fracture Incidence in Japan: Estimates Based on Nationwide Hip Fracture Surveys From 1992 to 2017                                                                                                                                          | No health insurance claims data used      | Nationwide Hip Fracture Surveys                                                     |
| Tang 2019       | The evaluation of the economic burden caused by delay in the diagnosis and treatment for patients with diabetes mellitus based on Japanese medical big data                                                                                              | Others (duplicate/ no original data used) | Chinese                                                                             |
| Tasaki 2012     | Visualization Model for Medical Care Processes by Utilizing Japanese Case-mix Classification and its Application to the Variance Analysis of Clinical Pathway                                                                                            | Hospital-based (<10 institutes)           | Saiseikai Kumamoto Hospital                                                         |
| Terahara 2019   | Carbapenem-resistant Pseudomonas aeruginosa and carbapenem use in Japan: an ecological study                                                                                                                                                             | Using published open data                 | The AMR Clinical Reference Centre of National Centre for Global Health and Medicine |
| Tochitani 2020  | Longitudinal association between mental health and future antibiotic prescriptions in healthy adults: Results from the LOHAS                                                                                                                             | Combined with primary research            | prospective cohort study                                                            |
| Tokuda 2011     | Cognitive error as the most frequent contributory factor in cases of medical injury: a study on verdict's judgment among closed claims in Japan                                                                                                          | No health insurance claims data used      | closed claims                                                                       |
| Toyoda 2015     | Visualization-based medical expenditure analysis support system                                                                                                                                                                                          | Others (duplicate/ no original data used) | Not available                                                                       |
| Toyoshima 2018  | Workers' sleep condition and related disorders in Japan: an analysis based on health insurance claim data and questionnaire                                                                                                                              | Others (duplicate/ no original data used) | among workers in a company                                                          |
| Tsuchiya 2014   | [Information technology for ensuring drug safety]                                                                                                                                                                                                        | Review article                            | Symposium Review                                                                    |
| Tsuda 2017      | Effect on Helicobacter pylori eradication therapy against gastric cancer in Japan                                                                                                                                                                        | Using published open data                 | NDB Open data                                                                       |
| Tsuji 2015      | How to Measure the Long-term Effect of e-Health: Application of DID-PSM                                                                                                                                                                                  | Combined with primary research            | National Health Insurance + mail survey                                             |
| Tsukada 2016    | Patterns of prescribing radiotherapy and bevacizumab in nationwide practice - analysis of 101 designated cancer care hospitals in Japan                                                                                                                  | Duplicates                                | duplicate (Tsukada 2016)                                                            |

|                |                                                                                                                                                                                                                              |                                           |                                                                                             |
|----------------|------------------------------------------------------------------------------------------------------------------------------------------------------------------------------------------------------------------------------|-------------------------------------------|---------------------------------------------------------------------------------------------|
| Tsukamoto 2016 | Have Case Loads of Radical Surgery for Prostate Cancer Been Concentrated in Hospitals with Robotic Equipment ?--Analyses with Questionnaire Survey and Diagnostic Procedure Combination (DPC) Data                           | Combined with primary research            | questionnaire survey                                                                        |
| Tsutsumi 2020  | Correction to: Impact of oral voriconazole during chemotherapy for acute myeloid leukemia and myelodysplastic syndrome: a Japanese nationwide retrospective cohort study                                                     | Others (duplicate/ no original data used) | Correction                                                                                  |
| Uchimoto 2019  | Prognostic impact of C-reactive protein-albumin ratio for the lethality in castration-resistant prostate cancer                                                                                                              | No health insurance claims data used      | collected clinical records                                                                  |
| Uenishi 2010   | [Nutrition and bone health. Food for specified health use (FOSHU) and bone health]                                                                                                                                           | Others (duplicate/ no original data used) | different theme                                                                             |
| Usuki 2020     | Retraction statement: National database study on the use of long-acting antipsychotic injections and hospital readmission proportions in patients with schizophrenia in Japan                                                | Others (duplicate/ no original data used) | Retraction                                                                                  |
| Usuki 2020     | National database study on the use of long-acting antipsychotic injections and hospital readmission proportions in patients with schizophrenia in Japan                                                                      | Others (duplicate/ no original data used) | Retraction                                                                                  |
| Wada 2011      | [Economic analysis in diagnosis procedure combination for disseminated intravascular coagulation]                                                                                                                            | Using published open data                 | DPC data (MHLW)                                                                             |
| Wang 2010      | Impact of the Japanese diagnosis procedure combination-based payment system in Japan                                                                                                                                         | Using published open data                 | DPC hospitals (disk: MHLW)                                                                  |
| Watanabe 2019  | Japanese Case of Enzalutamide-Resistant Prostate Cancer Harboring a SPOP Mutation With Scattered Allelic Imbalance: Response to Platinum-Based Therapy                                                                       | Others (duplicate/ no original data used) | Case Report                                                                                 |
| Watanabe 2020  | Effect of surgical margin width after R0 resection for intrahepatic cholangiocarcinoma: A nationwide survey of the Liver Cancer Study Group of Japan                                                                         | No health insurance claims data used      | The Nationwide Follow-up Survey of Primary Liver Cancer                                     |
| Yamada 2015    | Surgical Outcomes of Patients With Stage III Thymoma in the Japanese Nationwide Database                                                                                                                                     | No health insurance claims data used      | a nationwide study on thymoma (JART)                                                        |
| Yamada 2020    | Prevalence and clinical characteristics of children with medical complexity in Tottori Prefecture, Japan: A population-based longitudinal study                                                                              | Hospital-based (<10 institutes)           | three hospitals                                                                             |
| Yamaguchi 2019 | Flutamide as an Alternative Anti-androgen Agent and Predictor of the Efficacy of Novel Androgen Receptor-targeted Agents                                                                                                     | No health insurance claims data used      | medical records                                                                             |
| Yamamoto 2014  | [Privacy and public benefit in using large scale health databases]                                                                                                                                                           | Review article                            | Symposium Review                                                                            |
| Yamamoto 2016  | Large-scale Health Information Database and Privacy Protection                                                                                                                                                               | Review article                            | Conferences and Lectures                                                                    |
| Yamamoto 2018  | Perforation and Postoperative Bleeding Associated with Endoscopic Submucosal Dissection in Colorectal Tumors: An Analysis of 398 Lesions Treated in Saga, Japan                                                              | No health insurance claims data used      | Saga Medical School and Saga-ken Medical Centre Koseikan                                    |
| Yamamoto 2019  | Resuscitative endovascular balloon occlusion of the aorta (REBOA) is associated with improved survival in severely injured patients: A propensity score matching analysis                                                    | No health insurance claims data used      | Japan Trauma Data Bank                                                                      |
| Yamanaka 2020  | [Using Real World Data in Cancer Clinical Studies]                                                                                                                                                                           | Review article                            | Review                                                                                      |
| Yamashita 2017 | Comparison of the length of stay in patients hospitalized and initiated with dabigatran or warfarin for a concomitant non-valvular atrial fibrillation in real-world Japanese therapeutic practice (SHORT-J)                 | Duplicates                                | Duplicate (山下2017)                                                                          |
| Yamauchi 2019  | Evaluation of neurofibromatosis type 1 progression using a nationwide registry of patients who submitted claims for medical expense subsidies in Japan between 2008 and 2012                                                 | No health insurance claims data used      | a nationwide registry of patients who submitted claims to receive medical expense subsidies |
| Yanai 2016     | Syndrome of inappropriate antidiuretic hormone secretion in a patient with castration-resistant prostate cancer treated with enzalutamide                                                                                    | No health insurance claims data used      | letter to the editor                                                                        |
| Yang 2011      | Impact of physical activity and performance on medical care costs among the Japanese elderly                                                                                                                                 | Combined with primary research            | with a self-administered questionnaire                                                      |
| Yano 2012      | Association between prehypertension and chronic kidney disease in the Japanese general population                                                                                                                            | No health insurance claims data used      | a nationwide Japanese database                                                              |
| Yasunaga 2010  | Clinical features of bowel anisakiasis in Japan                                                                                                                                                                              | Duplicates                                | Duplicate (Yasunaga 2010)                                                                   |
| Yasunaga 2014  | [Application of the diagnosis procedure combination (DPC) data to clinical studies]                                                                                                                                          | Review article                            | Review                                                                                      |
| Yoshida 2010   | Health insurance and payment systems for severe acute pancreatitis                                                                                                                                                           | Review article                            | Guidelines                                                                                  |
| Yoshimura 2018 | Survey of anticonvulsant drugs and lithium prescription in women of childbearing age in Japan using a public national insurance claims database                                                                              | Using published open data                 | NDB Open data                                                                               |
| Yoshioka 2010  | Comparison of public and private care management agencies under public long-term care insurance in Japan: a cross-sectional study                                                                                            | No health insurance claims data used      | Long-Term Care Insurance (LTCI)                                                             |
| Zaito 2016     | Risk of alcohol consumption in bladder cancer: Case-control study from a nationwide inpatient database in Japan                                                                                                              | No health insurance claims data used      | a nationwide inpatient clinical database                                                    |
| Zeller 2018    | An international investigation into AB plasma administration in hospitals: how many AB plasma units were infused? The HABSWIN study                                                                                          | No health insurance claims data used      |                                                                                             |
| Abe 2014       | [Evaluation of DPC classification by Decision tree method : Analysis and discussion about pneumonia]                                                                                                                         | Hospital-based (<10 institutes)           |                                                                                             |
| Inoue 2019     | [Factors related to life expectancy in prefectures: An ecological study using the National Database]                                                                                                                         | No health insurance claims data used      | Health Checkup Database                                                                     |
| Inoue 2019     | [The Factors of Disparity Related to the Life Expectancy among Prefectures : an Analysis Using the National Data Base : Ecological Study]                                                                                    | No health insurance claims data used      | Health Checkup Database                                                                     |
| Uryu 2012      | [Changes in medical treatment fees for pneumococcal pneumonia in our hospital before and after the introduction of DPC]                                                                                                      | Hospital-based (<10 institutes)           | Single-center                                                                               |
| Endo 2012      | [Economic Optimization of the Inpatient's Visit to Dermatology Department : Simulation Study]                                                                                                                                | Hospital-based (<10 institutes)           | Single-center                                                                               |
| Okumura 2014   | [Trends of psychotropic medication use among children and adolescents in Japan data from the national insurance claims database between 2002 and 2010]                                                                       | Using published open data                 | Statistics of Medical Care Activities in Public Health Insurance                            |
| Oka 2016       | [Practical use of the data in a patient ward change of function]                                                                                                                                                             | Hospital-based (<10 institutes)           | Single-center                                                                               |
| Okamoto 2013   | [Do the prices of DPC (diagnosis-procedure-combination) hospitals reflect their quality of care? : The relationship between the price levels and the quality of care as measured by case-mix-adjusted in-hospital mortality] | Using published open data                 | DPC data (MHLW)                                                                             |
| Okamoto 2014   | [Estimation of per-case hospitalization charges from Diagnosis-Procedure-Combination (DPC) data and an international comparison of hospital prices]                                                                          | Using published open data                 | DPC data (MHLW)                                                                             |
| Onda 2010      | [BENCHMARK FOR THE TREATMENT OF PNEUMONIA AT DPCHOSPITALS FOCUSING ON THE USE OF ANTIMICROBIALS]                                                                                                                             | Hospital-based (<10 institutes)           | 4 hospitals                                                                                 |

|                |                                                                                                                                                                                                                                                                        |                                           |                                                                               |
|----------------|------------------------------------------------------------------------------------------------------------------------------------------------------------------------------------------------------------------------------------------------------------------------|-------------------------------------------|-------------------------------------------------------------------------------|
| Kato 2020      | [Efforts to achieve proper use of sleeping pills using the sleeping pill formula/NDB open database]*                                                                                                                                                                   | Hospital-based (<10 institutes)           | single-center                                                                 |
| Kawai 2011     | [Economic Benefits and Problems concerning the Introduction of Generic Drugs in a Hospital with a DPC System]                                                                                                                                                          | No health insurance claims data used      | questionnaire survey                                                          |
| Kawai 2014     | [Effort for regional medical analysis using DPC data and Quantum GIS (QGIS)]                                                                                                                                                                                           | Hospital-based (<10 institutes)           | single-center                                                                 |
| Kono 2018      | [Hospital Mortality of Spinal Infection : Results from Japanese Nationwide Diagnosis Procedure Combination Database]                                                                                                                                                   | Using published open data                 | DPC data (MHLW)                                                               |
| Toyama 2014    | [C2-4 Changing in Activities of Daily Living in the Hospital Stay]                                                                                                                                                                                                     | Hospital-based (<10 institutes)           | 5 hospitals                                                                   |
| Gamazawa 2013  | [Utilization of out-of-hospital prescriptions for remote areas during disasters Examples from the 2011 Great East Japan Earthquake]                                                                                                                                    | No health insurance claims data used      | Survey                                                                        |
| Iwata 2021     | [Survey of Dementia Drugs and PIM and Multi-Drug Combinations Using NDB Open Data]*                                                                                                                                                                                    | Using published open data                 | NDB Open data                                                                 |
| Yoshinaga 2013 | [An approach for improving clinical process using Hospital Information System(HIS) data]                                                                                                                                                                               | Hospital-based (<10 institutes)           | Single-center                                                                 |
| Yoshimi 2018   | [Comparison of prefectures using items related to smoking and quitting smoking in the 2nd NDB Open Data]*                                                                                                                                                              | Using published open data                 | NDB Open data                                                                 |
| Kubo 2018      | [DPC system for treatment of facial nerve palsy]                                                                                                                                                                                                                       | Using published open data                 | DPC summary tables (MHLW)                                                     |
| Miyamoto 2010  | [Influence on the outcome of the DPC cords by comparing Nissay Hospital with other medical institutions to which ICD10 cords and K-cords are applied]                                                                                                                  | Hospital-based (<10 institutes)           | 5 hospitals                                                                   |
| Miyamoto 2013  | [Strengths of our hospital by MDC analysis using DPC public data]*                                                                                                                                                                                                     | Using published open data                 | DPC data (MHLW)                                                               |
| Kuchiki 2010   | [Problems of DPC in stroke care]*                                                                                                                                                                                                                                      | Using published open data                 |                                                                               |
| Kuchiki 2011   | [Improvement of DPC in the Stroke Medical Care]                                                                                                                                                                                                                        | Hospital-based (<10 institutes)           | "our treatment options"                                                       |
| Kaneko 2018    | [Factors affecting profit/loss at national university hospitals]                                                                                                                                                                                                       | Using published open data                 | DPC data (MHLW)                                                               |
| Kinjo 2010     | [Attempts at marketing using the impact assessment survey data of the introduction of DPC]*                                                                                                                                                                            | Using published open data                 | DPC data (MHLW)                                                               |
| Komada 2017    | [Surveillance to Determine Adverse Reactions to Carbamazepine and Lamotrigine: Analysis of the "Japanese Adverse Drug Event Report", "Information on Adverse Reaction Relief Benefits" and "Health] Insurance Claims and Specific Health Checkups of Japan" Databases] | Using published open data                 | NDB Open data                                                                 |
| Kuriyama 2014  | [Analysis of Cancer Treatment in Iwate Prefecture – An Analysis of Health Care Regions Based on MHLW DPC Data]                                                                                                                                                         | Duplicates                                | duplicate (Kuriyama 2014)                                                     |
| Harada 2012    | [Analysis of hospital stay in patients with cerebral apoplexy]                                                                                                                                                                                                         | Hospital-based (<10 institutes)           | single-center                                                                 |
| Furuichi 2010  | [Effects and Problems of DPC (Diagnosis Procedure Combination): A Study on Femoral Neck Fractures]                                                                                                                                                                     | Hospital-based (<10 institutes)           | Single-center                                                                 |
| Furuta 2015    | [Estimation of prevalence of dementia among aged inpatients in general hospital]                                                                                                                                                                                       | Combined with primary research            | CGA                                                                           |
| Igarashi 2020  | [Estimating the Social and Economic Burden of Progressive Supranuclear Palsy in Japan]                                                                                                                                                                                 | Combined with primary research            | patient / caregiver survey (medical / nonmedical costs and productivity loss) |
| Goto 2011      | [Practical utility of the data of DPC as the management-tool in the hospital not adopting DPC]                                                                                                                                                                         | Hospital-based (<10 institutes)           | single-center                                                                 |
| Mitsutake 2018 | [The associations between readmission within 30 days and the medical institute factors among older patients receiving home medical care]                                                                                                                               | Duplicates                                | Duplicate (Mitsutake 2018)                                                    |
| Kudo 2018      | [Comparison of caries severity between those who perform dental maintenance and those who do not and investigation of the importance of maintenance using big data]*                                                                                                   | Others (duplicate/ no original data used) | Not available                                                                 |
| Yasunaga 2016  | [Clinical epidemiological study using integrated data of DPC data and test values]*                                                                                                                                                                                    | Others (duplicate/ no original data used) |                                                                               |
| Tsunekawa 2020 | [A Trial for Improving Coverage Rate Indices in Diagnosis Procedure Combination- Designated Medical Institutions]                                                                                                                                                      | Hospital-based (<10 institutes)           | Single-center                                                                 |
| Ehara 2014     | [Are pediatric inpatients centralized at core hospitals/regional pediatric centers? An analysis using DPC data]*                                                                                                                                                       | Using published open data                 | DPC data (MHLW)                                                               |
| Ehara 2017     | [Current status of hospitalization of children by prefecture as estimated from NDB open data]*                                                                                                                                                                         | Using published open data                 | NDB Open data                                                                 |
| Arai 2016      | [Importance of care process management in terms of financial perspective : based on knowledge of hospital managers]                                                                                                                                                    | No health insurance claims data used      | questionnaire survey                                                          |
| Arakawa 2013   | [Economic evaluation for the prevention of cervical cancer by vaccination--from perspective of health insurance society and industry]                                                                                                                                  | Duplicates                                | Duplicate (Arakawa 2013)                                                      |
| Takahashi 2015 | [The Characteristics of Income and Expenditure in MDC04C]                                                                                                                                                                                                              | Hospital-based (<10 institutes)           | 5 institutions                                                                |
| Takahashi 2018 | [Survey of opening clinical indicators of hospitals with DPC/PDPS in Hokkaido area]                                                                                                                                                                                    | Using published open data                 | DPC data (MHLW)                                                               |
| Takahashi 2020 | [Analysis of prolonged average length of hospital stay in colon malignant tumors]                                                                                                                                                                                      | Hospital-based (<10 institutes)           | Single-center                                                                 |
| Kurosaki 2020  | [Medical expenses for diabetes care in Japan: Analysis of inter-prefecture differences]                                                                                                                                                                                | Duplicates                                | Duplicate (Kurosaki 2020)                                                     |
| Kuroda 2020    | [Survey on Off-Label Use of Antineoplastic Agents in Pediatric Patients using a Large-scale Medical Database in Japan]                                                                                                                                                 | Duplicates                                | Duplicate (Kuroda 2020)                                                       |
| Konomura 2016  | [A Survey on Hospital Formulary Development in Japan in 2015]                                                                                                                                                                                                          | No health insurance claims data used      | questionnaire survey for medical institutions                                 |
| Imai 2012      | [Survey research group based on DPC data regarding the implementation status of standard drug treatment and clinical outcomes: A study on the implementation status survey of standard drug treatment using DPC data]*                                                 | Hospital-based (<10 institutes)           | Single-center                                                                 |
| Imai 2015      | [A Multi-institutional Survey of Risk Factors for the Prescription of Brought-in Medicine]                                                                                                                                                                             | No health insurance claims data used      | questionnaire survey                                                          |
| Imai 2016      | [Recurrence rate of ischemic stroke in the Shizuoka Stroke Network: a retrospective multicenter study]                                                                                                                                                                 | Hospital-based (<10 institutes)           | three general hospitals                                                       |
| Sato 2015      | [Current situation and issues related to claiming of charges for the operations of nutrition support teams]                                                                                                                                                            | Combined with primary research            | questionnaire survey                                                          |
| Sato 2017      | [Investigation on the situation of onychomycosis treatment using a survey on medical fee receipts and a questionnaire survey to patients with onychomycosis]                                                                                                           | Combined with primary research            | a questionnaire survey                                                        |
| Sato 2017      | [The Actual Condition of the Combined Diagnoses and the Influence of Added Modifiers for ICD-10 Codes]                                                                                                                                                                 | Hospital-based (<10 institutes)           | a hospital group                                                              |
| Sato 2019      | [Age-related trends in blood pressure based on large-scale health checkup data using longitudinal analysis]                                                                                                                                                            | No health insurance claims data used      | health checkup data                                                           |

|                 |                                                                                                                                                                                                                                                             |                                           |                                                              |
|-----------------|-------------------------------------------------------------------------------------------------------------------------------------------------------------------------------------------------------------------------------------------------------------|-------------------------------------------|--------------------------------------------------------------|
| Sakamoto 2014   | [Factor extraction of the liver cancer by the decision tree analysis using DPC data]                                                                                                                                                                        | Others (duplicate/ no original data used) | Abstract                                                     |
| Sakamoto 2014   | [Decision Tree Analysis of Factors Relating to Lung Cancers Using DPC Data]                                                                                                                                                                                 | Hospital-based (<10 institutes)           | 4 hospitals                                                  |
| Sakamoto 2019   | [Analysis of estimate factors about the severity of cerebral infarction and patient's level of need for medical treatment and nursing care]                                                                                                                 | Hospital-based (<10 institutes)           | three hospitals                                              |
| Miura 2017      | [Current status and measures against non-communicable diseases (NCD) in the National Health Plan]                                                                                                                                                           | No health insurance claims data used      | WHO: MiNDbank                                                |
| Yamashita 2019  | [Clustering Analysis of DPC Data Using Weighted PLSA for Medical Treatments for Patients with Sepsis Including Blood Purification]                                                                                                                          | Hospital-based (<10 institutes)           | single-center                                                |
| Yamazaki 2018   | [Big data analysis at Osaka International Cancer Center]*                                                                                                                                                                                                   | Hospital-based (<10 institutes)           | Osaka International Cancer Institute                         |
| Yamazaki 2020   | [Examination of problems: Indications for myelography]*                                                                                                                                                                                                     | Hospital-based (<10 institutes)           | Single-center                                                |
| Yamanaka 2016   | [Development of a Framework for Evaluating Appropriateness of Antimicrobial Agent Use]                                                                                                                                                                      | Hospital-based (<10 institutes)           | single-center                                                |
| Yamada 2012     | [Economic Analysis of Profit Improvement Derived from the Introduction of Generics by Tokai Consortium for Municipal Hospitals (ToCoM)]                                                                                                                     | Hospital-based (<10 institutes)           | 9 hospitals (ToCoM)                                          |
| Yamauchi 2018   | [Current status of osteoporosis screening – Relationship with osteoporotic fractures and need for long-term care –]                                                                                                                                         | Using published open data                 | NDB Open data                                                |
| Yamanouchi 2018 | [Considering community "recovery" from hospital discharge rate and re-hospitalization rate]                                                                                                                                                                 | Using published open data                 | published data                                               |
| Yamamoto 2015   | [An example of management simulation using DPC data and operating room system data]*                                                                                                                                                                        | Hospital-based (<10 institutes)           | Single-center                                                |
| Teraoka 2021    | [A study on the COVID-19 pandemic and hospital medical fees – Assessment of impact using DPC data from QIP participating hospitals]*                                                                                                                        | Combined with primary research            | QIP + questionnaire survey                                   |
| Sakai 2013      | [DPC Data Based Situation Analysis of Regional Core Hospital: An Application of the GIS Methodology for Regional Health Care Plans]                                                                                                                         | Duplicates                                | Duplicate (Sakai 2013)                                       |
| Munakata 2016   | [Relationship between Lipid Measures and Brain or Heart Disease in the Japanese General Population: The Watari Study]                                                                                                                                       | Combined with primary research            | Watari study (a community-based prospective cohort study)    |
| Akiyama 2012    | [Investigation of the Actual Health Care Area Using Diagnosis Procedure Combination (DPC) Data and Geographic Information System (GIS) in the Secondary Health Care Area]                                                                                   | Hospital-based (<10 institutes)           | Single-center                                                |
| Funahashi 2013  | [Attributes of non-participants aged 40-59 years in specific health check-ups]                                                                                                                                                                              | No health insurance claims data used      | questionnaire survey                                         |
| Ogata 2012      | [Investigation of the hospitalization days and medical cost of the homeless and the livelihood protection patient using DPC data for four years]                                                                                                            | Hospital-based (<10 institutes)           | Single-center                                                |
| Obara 2016      | [Additional cost in medical care and length of stay due to aspiration pneumonia that inpatients developed : Observational study using DPC data]                                                                                                             | Hospital-based (<10 institutes)           | Single-center                                                |
| Obara 2016      | [A sensitivity analysis of medical expenses for aspiration pneumonia which occurred after admission]                                                                                                                                                        | Hospital-based (<10 institutes)           | Single-center                                                |
| Kobayakawa 2014 | [The Analysis of Critical Path using Receipt Data and Its Application]                                                                                                                                                                                      | Hospital-based (<10 institutes)           | Single-center                                                |
| Koike 2019      | [A fact-finding survey on the characteristics of those who became insured persons of the National Health Insurance after mandatory retirement, etc., and the support provided by National Health Insurance Organizations]*                                  | No health insurance claims data used      | questionnaires to insurers                                   |
| Oda 2018        | [Examination of idiopathic pulmonary fibrosis patients with rapidly progressive severe respiratory failure using DPC data]*                                                                                                                                 | Others (duplicate/ no original data used) |                                                              |
| Obata 2013      | [Efficiency Index of Diagnosis Procedure Combination after Adjustment for Disease Severity and Definitions of Advanced General Hospital for the Acute Care]                                                                                                 | Hospital-based (<10 institutes)           | 6 hospitals                                                  |
| Matsui 2010     | [An action for attaching the suitable disease name using medical record management data and DPC survey data]                                                                                                                                                | Hospital-based (<10 institutes)           | Single-center                                                |
| Matsui 2013     | [Attempt to analyze regional characteristics using GIS software and DPC data]                                                                                                                                                                               | Hospital-based (<10 institutes)           | Single-center                                                |
| Matsunaga 2012  | [FACTORS RELATED TO THE INTER-HOSPITALS DIFFERENCE IN THE STATES OF IMPLEMENTATION OF DRUG MANAGEMENT GUIDANCE JOBS]                                                                                                                                        | Combined with primary research            | questionnaire survey                                         |
| Matsuhisa 2014  | [Establishment of Tokushima Prefecture Diabetes Medical Care Coordination System Using ICT]*                                                                                                                                                                | Others (duplicate/ no original data used) | Establishment of the local medical care system               |
| Matsuyama 2017  | [Regional disparities in dental consultation for preschool children]*                                                                                                                                                                                       | Using published open data                 | Survey on the Trend of Medical Care Expenditures (MHLW)      |
| Matsuta 2020    | [Regional Difference Analysis in Age-Adjusted Medical Expenses Focusing on the Cohort and Medical Practice Codes]                                                                                                                                           | Using published open data                 | Analysis of regional differences in health care costs (MHLW) |
| Matsuda 2018    | [Big data analysis of medical and nursing care: Examination of the effects of specific health checkups and specific health guidance in regional insurance]*                                                                                                 | No health insurance claims data used      | health checkup data                                          |
| Matsuda 2018    | [A study on appropriate allocation of acute myocardial infarction treatment facilities using DPC and NDB]*                                                                                                                                                  | Using published open data                 | DPC data (MHLW)                                              |
| Matsumoto 2018  | [Relationship between the Number of Adult Obesity and Neuropsychiatric Prescription Drugs]                                                                                                                                                                  | Using published open data                 | NDB Open data                                                |
| Kamijo 2020     | [A Study on Estimating the Extraction of Permanent Teeth by Main Reason, Using the Japanese National Database of Health Insurance Claims and Specific Health Checkups of Japan (NDB Japan) and the Second Survey of Reasons for Permanent Teeth Extraction] | Using published open data                 | NDB Open data                                                |
| Shida 2010      | [Image Examination of Malignant Tumors in Lungs Observed on the Basis of Cost Analysis Using Diagnosis Procedure Combination Data]                                                                                                                          | Duplicates                                | Duplicate (Shida 2010)                                       |
| Moriwaki 2019   | [Evaluating medical functions in hospital wards by focusing on patients' structure]                                                                                                                                                                         | Hospital-based (<10 institutes)           | Single-center                                                |
| Kamigaki 2012   | [On Prescription of Beta 2 Agonists for Pediatric Patients with Acute Bronchitis in Japan]                                                                                                                                                                  | Combined with primary research            | intervention study                                           |
| Jingushi 2019   | [The present situation of the fracture treatment in Japan according to the 2nd open data from the National Database of Health Insurance Claims and Specific Health Checkups of Japan]                                                                       | Using published open data                 | NDB Open data                                                |
| Sugita          | [Developing systems for analyzing and utilizing data about health services to prevent lifestyle-related diseases in districts]                                                                                                                              | No health insurance claims data used      | system building                                              |

|                |                                                                                                                                                                                                                                                  |                                           |                                                                         |
|----------------|--------------------------------------------------------------------------------------------------------------------------------------------------------------------------------------------------------------------------------------------------|-------------------------------------------|-------------------------------------------------------------------------|
| Suga 2018      | [The Current State of Non-traumatic Intracranial Hemorrhage Treatment in Japan Using the Diagnosis Procedure Combination Data from 2014]                                                                                                         | Using published open data                 | DPC data (MHLW)                                                         |
| Shimizu 2018   | [A comprehensive survey of clinical practice concerning telemedicine treatment]                                                                                                                                                                  | Using published open data                 | NDB Open data                                                           |
| Shimizu 2021   | [Counseling project for patients jointly conducted by the Japan Pharmaceutical Association, insurers, Japan Medical Association, and universities (2nd report): Analysis of health insurance claims data and questionnaire results for doctors]* | Combined with primary research            | intervention study                                                      |
| Nishimura 2011 | [Influence of staffing and administrative policy of ICU on Patient outcome]                                                                                                                                                                      | No health insurance claims data used      | questionnaire survey                                                    |
| Nishina 2011   | [Evaluation of the impacts of DPC based on obstetric DIC]*                                                                                                                                                                                       | Hospital-based (<10 institutes)           | Single-center                                                           |
| Ishikawa 2013  | [A study on the effects of preventive interventions for specific health guidance: A causal analysis with propensity scores using a large-scale database]*                                                                                        | No health insurance claims data used      | Health checkup data                                                     |
| Ishikawa 2018  | [The ratio of home deaths and related factors in national municipalities, ecological study]                                                                                                                                                      | No health insurance claims data used      | official data                                                           |
| Kawamura 2015  | [Effectiveness of Colorectal Cancer Screening as Means of Disease Discovery in Terms of Disease Progression Status and Medical Costs]                                                                                                            | No health insurance claims data used      | a hospital group                                                        |
| Asaumi 2011    | [Report of analysis case with medical treatment statistics that use DPC data]                                                                                                                                                                    | Hospital-based (<10 institutes)           | Single-center                                                           |
| Asami 2015     | [The current state and the outcome of dementia patients in the acute hospital]                                                                                                                                                                   | Hospital-based (<10 institutes)           | Single-center                                                           |
| Maeda 2014     | [Regional characteristics and future prospects in the number of patients TKA from public data DPC]                                                                                                                                               | Using published open data                 | DPC data (MHLW)                                                         |
| Muramatsu 2013 | [Prefectural Medical Care Delivery System from the National Database (NDB): Analysis of Lifestyle-related Medical Practices Using Publicly Available Indicators Created from the NDB]*                                                           | Using published open data                 | DPC Research Institute                                                  |
| Murakami 2012  | [Comparison between medical treatment fee between DPC and service basis for spinal infection]                                                                                                                                                    | Hospital-based (<10 institutes)           | Single-center                                                           |
| Murashima 2011 | [HIM's function on the job of outpatients' department: a report from examination committee notification]                                                                                                                                         | No health insurance claims data used      | report from examination committee notification                          |
| Ota 2020       | [Proposal of Method for Estimating the Situation of Regional Healthcare Using NDB Open Data and Sickbed Function Reports Data: Estimation of Implementation Status of Surgery in Inpatient Care in Okayama Prefecture]                           | Using published open data                 | NDB Open data                                                           |
| Osawa 2018     | [Efforts to increase the proportion of generic drugs used]*                                                                                                                                                                                      | Others (duplicate/ no original data used) |                                                                         |
| Otsubo 2012    | [Readmission rate for health care delivery system assessment]                                                                                                                                                                                    | Duplicates                                | Duplicate (Ootsubo 2012)                                                |
| Oshima 2016    | [Change in the number of denture according to survey statistics of medical care activities in public health insurance]                                                                                                                           | Using published open data                 | statistics of medical care activities in public health insurance        |
| Oshima 2018    | [Correlations between regional distribution of dental hygienists and dentistry service : Analysis using NDB open data Japan]                                                                                                                     | Using published open data                 | NDB Open data                                                           |
| Oshima 2020    | [Outpatient chemotherapy/inpatient chemotherapy: Management analysis in cost accounting: Profit-based study on individual anticancer drugs]*                                                                                                     | Hospital-based (<10 institutes)           | Single-center                                                           |
| Ono 2020       | [Age- and gender-specific prescriptions and fracture surgeries of osteoporosis treatment in Japan using the National Health Insurance Claim Database]                                                                                            | Using published open data                 | NDB Open data                                                           |
| Tanihara 2012  | [Trend and current situation of medical research using health insurance claims among Japan, Korea, and Taiwan]                                                                                                                                   | Review article                            | review study                                                            |
| Niwa 2020      | [Evaluation of the Antimicrobial Consumption Calculated Using the Japan Surveillance for Infection Prevention and Healthcare Epidemiology (J-SIPHE) System]                                                                                      | Hospital-based (<10 institutes)           | single-center                                                           |
| Ikehata 2018   | [Benchmarking of Clinical Pathways for endoscopic submucosal dissection using DPC data]                                                                                                                                                          | Hospital-based (<10 institutes)           | Single-center                                                           |
| Ikehata 2018   | [Benchmarking of clinical pathway system for endoscopic submucosal dissection according to DPC data of 9 hospitals among Iwate Prefectural Hospital group]                                                                                       | Hospital-based (<10 institutes)           | 9 hospitals                                                             |
| Ikehata 2020   | [Hemorrhagic peptic ulcer -Current status and medical-economic evaluation-]                                                                                                                                                                      | Hospital-based (<10 institutes)           | Single-center                                                           |
| Nakamura 2015  | [Evaluation of the Number of Varicella Patients Estimated by Prescription Surveillance]                                                                                                                                                          | Duplicates                                | Duplicate (Nakamura 2015)                                               |
| Nakamura 2016  | [Current status of oral anticoagulants and stroke patients at our hospital]*                                                                                                                                                                     | Hospital-based (<10 institutes)           | single-center                                                           |
| Nakajima 2014  | [Examination of correlation between medical expenses with average life expectancy according to municipality and gender]                                                                                                                          | Using published open data                 | Analysis of regional differences in medical expenses (MHLW)             |
| Nakajima 2014  | [Evaluation of University Hospitals Including Diagnosis Procedure Combination (DPC) Data, Functional Evaluation Coefficient II, and Management Indicators]*                                                                                      | Using published open data                 | DPC data (MHLW)                                                         |
| Nakajima 2015  | [Examination of the Difference in Medical Treatment Contents According to Major Diagnostic Category of Hospital Group I and Group II Using the Diagnosis Procedure Combination Survey Data]                                                      | Using published open data                 | DPC survey data (MHLW)                                                  |
| Nakajima 2015  | [Examination of diagnosis procedure combination survey data that influence function evaluation coefficient II]                                                                                                                                   | Using published open data                 | DPC survey data (MHLW)                                                  |
| Nakajima 2015  | [Investigation of average life expectancy by prefecture using basic data on regional differences in medical care]*                                                                                                                               | Using published open data                 | (regional differences in health care)                                   |
| Nakajima 2016  | [Type Classification Based on Inpatient Ratio According to Major Diagnostic Category of Group III in the Diagnosis Procedure Combination System]                                                                                                 | Using published open data                 | DPC data (MHLW)                                                         |
| Nakajima 2016  | [Investigation of factors affecting functional evaluation coefficient II of DPC hospitals using multiple regression analysis]*                                                                                                                   | Using published open data                 | DPC data (MHLW)                                                         |
| Nakajima 2017  | [Examination of Factors that Influence the Operation Income and Expenditure Balance Difference Rate of 20 Educational Foundation Universities]                                                                                                   | Using published open data                 | DPC data (MHLW)                                                         |
| Nakajima 2017  | [Investigation of Nagano-type and metropolitan-type prefectures in relation to average life expectancy using DPC data]*                                                                                                                          | Using published open data                 | DPC data (MHLW)                                                         |
| Nakajima 2020  | [Major diagnostic group classifications and medical practices that affect the shortening of hospital stay]*                                                                                                                                      | Using published open data                 | DPC data (MHLW)                                                         |
| Nakajima 2020  | [Examination of Factors Affecting Life Expectancy by Prefecture Based on the Criteria of the Organisation for Economic Co-operation and Development]                                                                                             | Using published open data                 | Regional differences in healthcare delivery conditions (Cabinet Office) |
| Nakari 2015    | [Factors that Prolong Admission to Acute Care Hospitals]                                                                                                                                                                                         | No health insurance claims data used      |                                                                         |
| Nakamoto 2016  | [Can the quality of medical care be improved by providing feedback on the evaluation results of quality indicators for cancer care?]*                                                                                                            | Hospital-based (<10 institutes)           | 4 hospitals                                                             |

|                 |                                                                                                                                                                                                                    |                                           |                                 |
|-----------------|--------------------------------------------------------------------------------------------------------------------------------------------------------------------------------------------------------------------|-------------------------------------------|---------------------------------|
| Asamoto 2016    | [An economic analysis of relationship between hospital types and length of stay in a hospital]                                                                                                                     | Using published open data                 | DPC data (MHLW)                 |
| Asamoto 2017    | [The organizational factors affecting hospitalization of patients with cerebral infarction (without surgery) -Empirical findings on DPC hospitals in Tokai district's 4 prefectures-]                              | Using published open data                 | DPC data (MHLW)                 |
| Hasegawa 2013   | [The study of the promotion policy of the telemedicine]                                                                                                                                                            | No health insurance claims data used      |                                 |
| Tsukada 2011    | [Profitability study of laparoscopic gastrectomy cases after introduction of DPC]*                                                                                                                                 | Hospital-based (<10 institutes)           | Single-center                   |
| Tsukada 2016    | [Patterns of prescribing radiotherapy and bevacizumab in nationwide practice : analysis of 101 designated cancer care hospitals in Japan]                                                                          | Others (duplicate/ no original data used) | Japanese version (Tsukada 2016) |
| Tsuji 2012      | [The Long-term Effect of Telecare: Based on 10 Year Receipt Data of Nishi-aizu Town]                                                                                                                               | Combined with primary research            | with questionnaire survey       |
| Tsujioka 2018   | [The MDC portfolio management with the DPC public data and the level of need for nursing]                                                                                                                          | Using published open data                 | DPC data (MHLW)                 |
| Tahara 2013     | [A study on trends in the flow of patients centering on regional core hospitals in rural areas]*                                                                                                                   | Hospital-based (<10 institutes)           | single-center                   |
| Taguchi 2012    | [Efforts to utilize DPC data and future issues]*                                                                                                                                                                   | Hospital-based (<10 institutes)           | Single-center                   |
| Tagami 2018     | [Elucidation of circulatory and respiratory dynamics in post-cardiac arrest syndrome: Approach by transpulmonary thermodilution]*                                                                                  | No health insurance claims data used      |                                 |
| Tamura 2017     | [A Study on the Prescription Status of Metformin and DPP-4 Inhibitors in Patients with Type 2 Diabetes Mellitus in Japan: An Analysis of Data from Health Insurance Administrative Claims]                         | Duplicates                                | Duplicate (Tamura 2017)         |
| Tamura 2018     | [A Study on the Prescription Status of Metformin and DPP-4 Inhibitors in Patients with Type 2 Diabetes Mellitus in Japan : An analysis of Time Trends by Use of a Health Insurance Administrative Claims Database] | Duplicates                                | Duplicate (Tamura 2018)         |
| Tashiro 2014    | [Assessment of the Adequacy of the DPC Score in Neonatal Care]                                                                                                                                                     | Hospital-based (<10 institutes)           | 7 hospitals                     |
| Tashiro 2015    | [Verification of medical fees in neonatal intensive care units: To provide high-quality medical care efficiently and economically]*                                                                                | Hospital-based (<10 institutes)           | 7 hospitals                     |
| Tashiro 2015    | [Assessment of the adequacy of the DPC score in neonatal care : Analysis of the DPC data from children's hospitals]                                                                                                | Hospital-based (<10 institutes)           | 7 hospitals                     |
| Tanaka 2015     | [Cancer treatment situation in Japan with regard to the type of medical facility using medical claim data of Health Insurance Societies]                                                                           | Duplicates                                | duplicate (Tanaka 2015)         |
| Tanaka 2016     | [On the Size Distribution of Hospitals: Empirical Study and Stochastic Model]                                                                                                                                      | Using published open data                 | DPC data (MHLW)                 |
| Tanaka 2016     | [The effects of the functional differentiation of hospitals on the regional mean length of stay]*                                                                                                                  | Using published open data                 | DPC data (MHLW)                 |
| Tanaka 2017     | [Actual use of direct oral anticoagulant (DOAC) in fiscal year 2014 : using the national database of health insurance claims and specific health checkups of Japan (NDB) open data]                                | Using published open data                 | NDB Open data                   |
| Tanaka 2018     | [Determining the acute period in transurethral bladder tumor resection using DPC data]*                                                                                                                            | Hospital-based (<10 institutes)           | single-center                   |
| Tanaka 2018     | [Survey of Prescription Volume and Adverse Events of NSAIDs Patches in Fiscal Year 2015]                                                                                                                           | Using published open data                 | NDB Open data                   |
| Tanaka 2019     | [Analysis of DPC Data by Topic Model and Consideration on Function of Hospitals]                                                                                                                                   | Using published open data                 | DPC data (MHLW)                 |
| Tanaka 2019     | [Investigation of the usefulness of antimicrobial use survey using Diagnosis Procedure Combination (DPC) data]*                                                                                                    | Duplicates                                | Duplicate (Tanaka 2019)         |
| Tanaka 2019     | [Investigation of Prescription Pattern of Antiretroviral Using the National Database of Health Insurance Claims Specific Health Checkups of Japan Open Data]                                                       | Using published open data                 | NDB Open data                   |
| Tanaka 2020     | [Survey on prescribing status of NSAIDs patch formulations: Perspectives on promotion of generic drug use and prescribing restrictions]*                                                                           | Using published open data                 | NDB Open data                   |
| Tazawa 2013     | [Investigation of the need for assistance using ADL score at admission]*                                                                                                                                           | Hospital-based (<10 institutes)           | Single-center                   |
| Tazawa 2016     | [Investigation of the state of care required and destination of discharge using DPC data]*                                                                                                                         | Hospital-based (<10 institutes)           | Single-center                   |
| Watanabe 2019   | [Inpatient survey for prefectural medical plan formulation]                                                                                                                                                        | Combined with primary research            | questionnaires to institutions  |
| Fujimura 2010   | [Evaluation of the Diagnosis Procedure Combination Payment System]                                                                                                                                                 | Hospital-based (<10 institutes)           | single-center                   |
| Fujino 2017     | [Multicenter inter-comparison tool for surgical procedures using Diagnosis Procedure Combination survey data]                                                                                                      | Using published open data                 | DPC data (VHJ)                  |
| Nawata 2010     | [Analysis of Length of Hospital Stay for Cataract Surgery Before and After Introduction of the Diagnosis Procedure Combination -Based Inclusive Payment System]                                                    | Hospital-based (<10 institutes)           | 5 hospitals                     |
| Minamizono 2019 | [Gender, age, and regional distribution of equivalent conversion values for outpatient prescription psychotropic drugs: From the 2nd NDB Open Database]*                                                           | Using published open data                 | NDB Open data                   |
| Hatanaka 2015   | [Risk factors for ischemic heart disease in males in the prime of life: An eight-year follow-up study]                                                                                                             | Duplicates                                | Duplicate (Hatanaka 2015)       |
| Ozaki 2018      | [Impact of Oral Hygiene Management through a Multidisciplinary Approach on Patients with Acute Stroke: Building a Pneumonia-Prevention System by Dentistry]                                                        | Hospital-based (<10 institutes)           | Single-center                   |
| Muto 2014       | [Evaluation of Cost-effectiveness analysis in Hospital Management by using Diagnosis Procedure Combination (DPC) data : a pilot case of the medical equipment]                                                     | Hospital-based (<10 institutes)           | Single-center                   |
| Fushimi 2010    | [Health care Resource Allocation by DPC Case-mix Data]                                                                                                                                                             | Review article                            | Review                          |
| Fushimi 2016    | [Toward the improvement of health and medical statistics using electronic health insurance claims: Overview of "Study on Improving Claims Statistics Using Electronic Claims" (Part 1)]*                           | Review article                            | Review                          |
| Fukuda 2012     | [Estimates of Postoperative Resource Utilization Attributable to Surgical Site Infection in Gastrectomy Patients: Evidence from The JANIS/DPC Integrated Database]                                                 | Hospital-based (<10 institutes)           | 6 institutes                    |
| Fukuda 2014     | [Possibility of analyzing claim data for specified insurance medical materials]*                                                                                                                                   | No health insurance claims data used      | insurance coverage documents    |
| Fukuda 2017     | [A study on building an integrated database of medical and clinical information]*                                                                                                                                  | Hospital-based (<10 institutes)           | 7 hospitals                     |
| Fukudome 2014   | [A study and report: Analysis of acute inpatient care in the Kagoshima medical area using DPC and patient survey data]*                                                                                            | Using published open data                 | DPC data (MHLW)                 |
| Hiraoka 2018    | [A Study of Evaluating Risk Factors Assessment sheet for Prediction of Falls in Inpatients : Example of using Diagnosis Procedure Combination (DPC) data]                                                          | Hospital-based (<10 institutes)           | Single-center                   |

|                |                                                                                                                                                                                                      |                                           |                                                                                                                     |
|----------------|------------------------------------------------------------------------------------------------------------------------------------------------------------------------------------------------------|-------------------------------------------|---------------------------------------------------------------------------------------------------------------------|
| Minetaki 2010  | [Empirical analysis of emergency medical care using medical microdata and the possibility of telemedicine]*                                                                                          | Hospital-based (<10 institutes)           | Single-center                                                                                                       |
| Horai 2019     | [Study of Flat-Sum Payment system and Opportunity cost in DPC system : especially considering lost profits of Radiological Technologist and Nurse]                                                   | No health insurance claims data used      |                                                                                                                     |
| Kitamura 2021  | [The pulmonary rehabilitation utilization rate among older people with chronic obstructive pulmonary disease in Japan: A retrospective study using medical and long-term care insurance claims data] | Duplicates                                | Duplicate (Kitamura 2021)                                                                                           |
| Makino 2017    | [Hybrid Research Concerning the Actual Prescription of Non-irritative Laxatives and Patient Consciousness]                                                                                           | Combined with primary research            | questionnaire survey                                                                                                |
| Akematsu 2010  | [Empirical analysis of a home health management system and medical expenses for four major lifestyle-related diseases]*                                                                              | Combined with primary research            | questionnaire survey                                                                                                |
| Akematsu 2012  | [Effect of Telecare on Medical Expenditures Estimated by Propensity Score Matching JTTA 2012 KOBE]                                                                                                   | Combined with primary research            | questionnaire survey                                                                                                |
| Akematsu 2013  | [Long-term Effect of Telecare Intervention on Patients with Chronic Diseases]                                                                                                                        | Combined with primary research            | on-site survey                                                                                                      |
| Kimura 2015    | [Treatment Persistence with Antidepressants in Japan: Assessment of the First 60 Days of Treatment Based on Pharmacy Claims Data from Reimbursement Database]                                        | Duplicates                                | Duplicate (Kimura 2015)                                                                                             |
| Kadowaki 2020  | [National trend of total hip arthroplasty evaluated by data from diagnosis procedure combination (DPC)]                                                                                              | Using published open data                 | DPC data (MHLW)                                                                                                     |
| Nonoshita 2012 | [Action to the improvement of clinical process in pneumonia by using Diagnosis Procedure Combination (DPC) data]                                                                                     | Hospital-based (<10 institutes)           | single-center                                                                                                       |
| Ryu 2010       | [To establish the standardized clinical pathway in gastric and colorectal cancers by benchmark analysis of DPC data]                                                                                 | Hospital-based (<10 institutes)           | five participating cancer centers                                                                                   |
| Suzuki 2011    | [The number of emergency admissions in Accredited Training Institutions for Fellowship and Senior Fellowship of the Japanese Association for Acute Medicine based on the DPC information]            | Using published open data                 | DPC data (MHLW)                                                                                                     |
| Suzuki 2019    | [Analysis on Real World Data (RWD) Using a Machine Learning Model: Exploration of the Factors Affecting the Utility of Oral Hypoglycemic Agents]                                                     | Duplicates                                | Duplicate (Suzuki 2019)                                                                                             |
| Wada 2019      | [Macro analysis of dental reimbursement claims in the last 10 years]*                                                                                                                                | Using published open data                 | Health Insurance Claims Review & Reimbursement services (Survey of medical treatment status by medical institution) |
| Kijima 2012    | [Analysis of Outpatient clinic, using E and F File of Outpatient]                                                                                                                                    | Hospital-based (<10 institutes)           | Single-center                                                                                                       |
| Kunisawa 2019  | [ [Introduction to health economics for healthcare professionals] Association between shortened hospital stay and readmission rate]*                                                                 | Others (duplicate/ no original data used) | (Contents: Kunisawa 2016)                                                                                           |
| Hamada 2011    | [ASSESSMENT OF WORKLOAD IN OBSTETRICS AND GYNECOLOGY PRACTICE BY TIME STUDY COMBINED WITH ADMINISTRATIVE DATA]                                                                                       | Combined with primary research            | time-study                                                                                                          |
| Saito 2012     | [Relationship between exercise habits at the recommended level of exercise and out-of-hospital medical expenses: A study in Fujisawa City]*                                                          | Combined with primary research            | questionnaire survey                                                                                                |

## Supplement file 4 Characteristics of included studies

| ID (Author Year)                                              | Title (*titles translated by author)                                                                                                                                                                 | Database  | Notes on database                                                   | Setting    | Notes on setting | Start data year | End data year | Research area/ theme                      | Research area/ theme-2                    | Disease                                   | Disease-2                                                    | Notes on disease                                                           | Age      | Notes on age                                         |
|---------------------------------------------------------------|------------------------------------------------------------------------------------------------------------------------------------------------------------------------------------------------------|-----------|---------------------------------------------------------------------|------------|------------------|-----------------|---------------|-------------------------------------------|-------------------------------------------|-------------------------------------------|--------------------------------------------------------------|----------------------------------------------------------------------------|----------|------------------------------------------------------|
| <b>1) Certain infectious and parasitic diseases (A00-B99)</b> |                                                                                                                                                                                                      |           |                                                                     |            |                  |                 |               |                                           |                                           |                                           |                                                              |                                                                            |          |                                                      |
| Sugiyama 2013                                                 | [Anisakis food poisoning: the annual number of cases noticed by ordinance for enforcement of the food sanitation act and estimated through healthcare claim data analysis]                           | JMDC      |                                                                     | Nationwide |                  | 2005            | 2011          | Clinical epidemiology, course of diseases | Health policy evaluation and utilization  | Certain infectious and parasitic diseases |                                                              | Anisakis                                                                   |          |                                                      |
| Kimura 2020                                                   | Clostridioides (Clostridium) difficile infection in Japanese hospitals 2008-2017: A real-world nationwide analysis of treatment pattern, incidence and testing density                               | MDV       |                                                                     | Nationwide |                  | 2008            | 2017          | Medical treatment status                  | Clinical epidemiology, course of diseases | Certain infectious and parasitic diseases |                                                              | Clostridioides difficile infection                                         | Others   | ≥18 year of age                                      |
| Mikamo 2020                                                   | Incidence of and risk factors for recurrent Clostridioidesdifficile infection in Japan using a claims database: A retrospective cohort study                                                         | MDV       |                                                                     | Nationwide |                  | 2012            | 2016          | Clinical epidemiology, course of diseases |                                           | Certain infectious and parasitic diseases |                                                              | recurrent Clostridioides difficile infection (A047)                        |          |                                                      |
| Fukuda 2018                                                   | Inpatient Expenditures Attributable to Hospital-Onset Clostridium difficile Infection: A Nationwide Case-Control Study in Japan                                                                      | NDB       |                                                                     | Nationwide |                  | 2010            | 2016          | Health economics                          |                                           | Certain infectious and parasitic diseases |                                                              | Clostridium difficile infections                                           |          |                                                      |
| Kunishima 2018                                                | Healthcare burden of recurrent Clostridioides difficile infection in Japan: A retrospective database study                                                                                           | MDV       |                                                                     | Nationwide |                  | 2012            | 2016          | Health economics                          |                                           | Certain infectious and parasitic diseases |                                                              | Clostridioides difficile infection (A047)                                  |          | patients of any age                                  |
| Yasunaga 2012                                                 | The burden of Clostridium difficile-associated disease following digestive tract surgery in Japan                                                                                                    | DPC       |                                                                     | Nationwide |                  | 2007            | 2010          | Intervention effect                       | Health economics                          | Certain infectious and parasitic diseases | Diseases of the digestive system                             | Clostridium difficile-associated disease following digestive tract surgery |          |                                                      |
| Ueno 2019                                                     | The clinical and economic burden of cytomegalovirus management post allogeneic hematopoietic stem cell transplantation in Japan - a retrospective database study                                     | MDV       |                                                                     | Nationwide |                  | 2010            | 2018          | Health economics                          |                                           | Certain infectious and parasitic diseases |                                                              | cytomegalovirus                                                            | Others   | ≥18 year of age                                      |
| Kajimoto 2020                                                 | Patient and National Economic Burden of Dengue in Japan: Results from Japanese National Claims Database                                                                                              | NDB       |                                                                     | Nationwide |                  | 2011            | 2015          | Health economics                          |                                           | Certain infectious and parasitic diseases |                                                              | Dengue                                                                     |          |                                                      |
| Kajimoto 2020                                                 | Clinical Management of Patients with Dengue infection in Japan: Results from National Database of Health Insurance Claims                                                                            | NDB       |                                                                     | Nationwide |                  | 2011            | 2015          | Medical treatment status                  | Quality of care                           | Certain infectious and parasitic diseases |                                                              | Dengue                                                                     |          |                                                      |
| Iwanaga 2015                                                  | [An investigation of the clinical practice for dermatophytosis treatment using reimbursement data from health insurance societies in Japan]                                                          | JMDC      | Existing epidemiological studies: JSMM, JFW, JOCD                   | Nationwide |                  | 2013            | 2014          | Medical treatment status                  | Research methodology                      | Certain infectious and parasitic diseases |                                                              | dermatophytosis                                                            |          |                                                      |
| Okubo 2019                                                    | Recent Prescription Patterns for Children With Acute Infectious Diarrhea                                                                                                                             | JMDC      |                                                                     | Nationwide |                  | 2012            | 2015          | Medical treatment status                  |                                           | Certain infectious and parasitic diseases |                                                              | acute infectious diarrhea                                                  | Children | aged under 18 years                                  |
| Morishima 2015                                                | [Estimating the numbers of enterobiasis cases in Japan: a healthcare claims database study]                                                                                                          | JMDC      |                                                                     | Nationwide |                  | 2005            | 2009          | Clinical epidemiology, course of diseases |                                           | Certain infectious and parasitic diseases |                                                              | enterobius                                                                 |          |                                                      |
| Takeuchi 2017                                                 | Pediatric urolithiasis associated with acute gastroenteritis: an inpatient database study in Japan                                                                                                   | DPC       |                                                                     | Nationwide |                  | 2010            | 2012          | Clinical epidemiology, course of diseases |                                           | Certain infectious and parasitic diseases | Diseases of the genitourinary system                         | acute gastroenteritis, urolithiasis                                        | Children | ≤59 months old                                       |
| Okubo 2018                                                    | Recent patterns in antibiotic use for children with group A streptococcal infections in Japan                                                                                                        | JMDC      |                                                                     | Nationwide |                  | 2012            | 2015          | Medical treatment status                  |                                           | Certain infectious and parasitic diseases | Diseases of the respiratory system                           | group A streptococcus (GAS)                                                | Children | aged <18 years                                       |
| Hamada 2021                                                   | In-hospital mortality among patients with invasive non-group A beta-hemolytic Streptococcus treated with clindamycin combination therapy: a nationwide cohort study                                  | DPC       |                                                                     | Nationwide |                  | 2010            | 2018          | Intervention effect                       |                                           | Certain infectious and parasitic diseases |                                                              | invasive group A Streptococcus infection                                   | Others   | excluded patients who were under the age of 16 years |
| Tokunaga 2021                                                 | Cost Analysis in Helicobacter pylori Eradication Therapy Based on a Database of Health Insurance Claims in Japan                                                                                     | JMDC      |                                                                     | Nationwide |                  | 2005            | 2018          | Health economics                          |                                           | Certain infectious and parasitic diseases | Diseases of the digestive system                             | H. pylori gastritis, H. pylori infection                                   |          |                                                      |
| Deguchi 2020                                                  | Current Status of Helicobacter pylori Diagnosis and Eradication Therapy in Japan Using a Nationwide Database                                                                                         | MDV       |                                                                     | Nationwide |                  | 2008            | 2016          | Intervention effect                       | Quality of care                           | Certain infectious and parasitic diseases |                                                              | Helicobacter pylori infection                                              |          |                                                      |
| Deguchi 2019                                                  | Association between parental history of Helicobacter pylori treatment failure and treatment failure in the offspring                                                                                 | JMDC      |                                                                     | Nationwide |                  | 2005            | 2018          | Clinical epidemiology, course of diseases | Medical treatment status                  | Certain infectious and parasitic diseases |                                                              | Helicobacter pylori                                                        |          |                                                      |
| Hiroi 2017                                                    | Impact of health insurance coverage for Helicobacter pylori gastritis on the trends in eradication therapy in Japan: retrospective observational study and simulation study based on real-world data | Others    | JMDC, MDV                                                           | Nationwide |                  | 2005            | 2015          | Health policy evaluation and utilization  |                                           | Certain infectious and parasitic diseases | Diseases of the digestive system                             | Helicobacter pylori gastritis                                              |          |                                                      |
| Fujimori 2014                                                 | [Changes in treatment of Helicobacter pylori infection after coverage of chronic gastritis insurance] Has eradication cases increased?]                                                              | NHI/LSEHS | National Health Insurance and Later-Stage Elderly Healthcare System | Prefecture | Hokkaido         | 2012            | 2013          | Medical treatment status                  | Health policy evaluation and utilization  | Certain infectious and parasitic diseases | Diseases of the digestive system                             | Helicobacter pylori eradication                                            |          |                                                      |
| Yatsushashi 2019                                              | [Clinical Study of Liver Disease using National Database (NDB) : Trends in the Number of Patients with Chronic Hepatitis C and Hepatitis B]                                                          | NDB       |                                                                     | Nationwide |                  | 2012            | 2016          | Clinical epidemiology, course of diseases |                                           | Certain infectious and parasitic diseases | Neoplasms                                                    | Chronic Hepatitis C and Hepatitis B                                        |          |                                                      |
| Fukuda 2020                                                   | Healthcare Expenditures for the Treatment of Patients Infected with Hepatitis C Virus in Japan                                                                                                       | NDB       |                                                                     | Nationwide |                  | 2010            | 2018          | Health economics                          |                                           | Certain infectious and parasitic diseases |                                                              | Hepatitis C Virus                                                          | Others   | ≥20 years of age                                     |
| Yamazaki 2019                                                 | Clinical and Economic Burden of Patients with Chronic Hepatitis C with Versus Without Antiviral Treatment in Japan: An Observational Cohort Study Using Hospital Claims Data                         | MDV       |                                                                     | Nationwide |                  | 2008            | 2016          | Health economics                          |                                           | Certain infectious and parasitic diseases |                                                              | chronic hepatitis C                                                        | Others   | ≥18 year of age                                      |
| Ruzicka 2018                                                  | Comorbidities and co-medications in populations with and without chronic hepatitis C virus infection in Japan between 2015 and 2016                                                                  | MDV       |                                                                     | Nationwide |                  | 2015            | 2016          | Clinical epidemiology, course of diseases | Medical treatment status                  | Certain infectious and parasitic diseases |                                                              | chronic hepatitis C virus (B18.2)                                          | Others   | aged ≥18 years                                       |
| Hirata 2017                                                   | Surveillance rates for hepatocellular carcinoma among patients with cirrhosis, chronic hepatitis B, and chronic hepatitis C based on Japanese claims database                                        | JMDC      |                                                                     | Nationwide |                  | 2011            | 2011          | Medical treatment status                  | Quality of care                           | Certain infectious and parasitic diseases | Diseases of the digestive system                             | LC, hepatitis B virus (HBV), or hepatitis C virus (HCV) infection          |          | age group                                            |
| Ohisa 2015                                                    | Estimated numbers of patients with liver disease related to hepatitis B or C virus infection based on the database reconstructed from medical claims from 2008 to 2010 in Japan                      | JMDC      |                                                                     | Nationwide |                  | 2008            | 2010          | Clinical epidemiology, course of diseases |                                           | Certain infectious and parasitic diseases |                                                              | hepatitis viruses                                                          | Others   | aged under 65 years                                  |
| Udagawa 2015                                                  | Using Clinical Databases to Verify the Impact of Regulatory Agency Alerts in Japan: Hepatitis B Testing Behavior After an Alert Regarding Risk of Viral Reactivation                                 | MDV       |                                                                     | Nationwide |                  | 2010            | 2012          | Health policy evaluation and utilization  |                                           | Certain infectious and parasitic diseases |                                                              | hepatitis B                                                                |          |                                                      |
| Sako 2011                                                     | Acute hepatitis B in Japan: Incidence, clinical practices and health policy                                                                                                                          | DPC       |                                                                     | Nationwide |                  | 2007            | 2008          | Clinical epidemiology, course of diseases | Medical treatment status                  | Certain infectious and parasitic diseases |                                                              | acute hepatitis B                                                          |          |                                                      |
| Yotsuyanagi 2021                                              | Characteristics and healthcare costs in the aging hepatitis B population of Japan: A nationwide real-world analysis                                                                                  | MDV       |                                                                     | Nationwide |                  | 2012            | 2016          | Clinical epidemiology, course of diseases | Health economics                          | Certain infectious and parasitic diseases |                                                              | Hepatitis B (ICD-10: B18.1)                                                | Others   | aged 18 years or older                               |
| Imai 2019                                                     | Validity of administrative database detection of previously resolved hepatitis B virus in Japan                                                                                                      | Others    | NHO, chart abstraction                                              | Others     | 4 hospitals      | 2011            | 2015          | Research methodology                      |                                           | Certain infectious and parasitic diseases | Diseases of the musculoskeletal system and connective tissue | hepatitis B virus, rheumatoid arthritis                                    |          |                                                      |
| Fujita 2018                                                   | Hepatitis B virus reactivation in patients with rheumatoid arthritis: Analysis of the National Database of Japan                                                                                     | NDB       |                                                                     | Nationwide |                  | 2013            | 2014          | Clinical epidemiology, course of diseases | Quality of care                           | Certain infectious and parasitic diseases | Diseases of the musculoskeletal system and connective tissue | hepatitis B virus, rheumatoid arthritis                                    | Others   | patients aged 30- 79 years                           |



|                |                                                                                                                                                                                                                               |        |                                                                                                                                                |            |       |      |                                           |                                           |                                                              |                                                              |                                                                                                     |                                      |
|----------------|-------------------------------------------------------------------------------------------------------------------------------------------------------------------------------------------------------------------------------|--------|------------------------------------------------------------------------------------------------------------------------------------------------|------------|-------|------|-------------------------------------------|-------------------------------------------|--------------------------------------------------------------|--------------------------------------------------------------|-----------------------------------------------------------------------------------------------------|--------------------------------------|
| Hagihara 2015  | The effectiveness of risk communication regarding drug safety information: a nationwide survey by the Japanese public health insurance claims data                                                                            | NDB    | national health insurance claims database (NHICD)                                                                                              | Nationwide | 2010  | 2010 | Health policy evaluation and utilization  | Certain infectious and parasitic diseases | Diseases of the musculoskeletal system and connective tissue | hepatitis, rheumatoid arthritis                              |                                                                                                     |                                      |
| Honda 2017     | Treatment patterns of postherpetic neuralgia patients before and after the launch of pregabalin and its effect on medical costs: Analysis of Japanese claims data provided by Japan Medical Data Center                       | JMDC   |                                                                                                                                                | Nationwide | 2005  | 2013 | Health policy evaluation and utilization  | Health economics                          | Certain infectious and parasitic diseases                    | postherpetic neuralgia                                       | Others<br>aged 18 years or older                                                                    |                                      |
| Imafuku 2020   | Risk of herpes zoster in the Japanese population with immunocompromising and chronic disease conditions: Results from a claims database cohort study, from 2005 to 2014                                                       | JMDC   |                                                                                                                                                | Nationwide | 2005  | 2014 | Clinical epidemiology, course of diseases |                                           | Certain infectious and parasitic diseases                    | Others                                                       | herpes zoster (with immunocompromising and chronic disease conditions)<br>Others<br>≥18 year of age |                                      |
| Imafuku 2019   | Burden of Herpes Zoster in the Japanese Population with Immunocompromised/Chronic Disease Conditions: Results from a Cohort Study Claims Database from 2005-2014                                                              | JMDC   |                                                                                                                                                | Nationwide | 2005  | 2014 | Clinical epidemiology, course of diseases | Health economics                          | Certain infectious and parasitic diseases                    | Herpes Zoster                                                | Others<br>aged 18-74 years                                                                          |                                      |
| Ruzicka 2018   | Comorbidities and the use of comedication in people living with HIV on antiretroviral therapy in Japan: a cross-sectional study using a hospital claims database                                                              | MDV    |                                                                                                                                                | Nationwide | 2010  | 2015 | Clinical epidemiology, course of diseases | Medical treatment status                  | Certain infectious and parasitic diseases                    | HIV                                                          | Others<br>aged ≥18 years                                                                            |                                      |
| Ruzicka 2019   | Greater burden of chronic comorbidities and co-medications among people living with HIV versus people without HIV in Japan: A hospital-claims database study                                                                  | MDV    |                                                                                                                                                | Nationwide | 2010  | 2015 | Clinical epidemiology, course of diseases | Medical treatment status                  | Certain infectious and parasitic diseases                    | HIV disease (ICD-10 codes B20-24)                            | Others<br>≥18 year of age                                                                           |                                      |
| Ruzicka 2019   | Switch rates, time-to-switch, and switch patterns of antiretroviral therapy in people living with human immunodeficiency virus in Japan, in a hospital-claim database                                                         | MDV    |                                                                                                                                                | Nationwide | 2008  | 2016 | Medical treatment status                  |                                           | Certain infectious and parasitic diseases                    | HIV disease                                                  | Others<br>aged ≥18 years                                                                            |                                      |
| Mizukami 2018  | Resource Use and Cost of Treating Human Papillomavirus-Related Lesions in Japanese Women                                                                                                                                      | Others | JMDC, MDV                                                                                                                                      | Nationwide | 2011  | 2011 | Health economics                          |                                           | Certain infectious and parasitic diseases                    | Diseases of the genitourinary system                         | Human Papillomavirus-Related Lesions                                                                | Others<br>aged 15 years or older     |
| Kishimoto 2021 | Early impact of school closure and social distancing for COVID-19 on the number of inpatients with childhood non-COVID-19 acute infections in Japan                                                                           | DPC    | QIP                                                                                                                                            | Nationwide | 2018  | 2020 | Health policy evaluation and utilization  | COVID-19                                  | Certain infectious and parasitic diseases                    | Diseases of the respiratory system                           | non-COVID-19 acute infections                                                                       | Children<br>aged 15 years or younger |
| Imai 2020      | Comparison of interactions between warfarin and cephalosporins with and without the N-methyl-thio-tetrazole side chain                                                                                                        | JMDC   |                                                                                                                                                | Nationwide | 2010  | 2017 | Intervention effect                       |                                           | Certain infectious and parasitic diseases                    | Diseases of the circulatory system                           | received warfarin during cephalosporin therapy, infections                                          | Others<br>≥18 year of age            |
| Nakamura 2015  | Proposition of real-time precise prediction model of infectious disease patients from Prescription Surveillance using the National Database of Electronic Medical Claims                                                      | NDB    | Aggregated data: Prescription Surveillance                                                                                                     | Nationwide | 2010  | 2013 | Prediction model                          | Clinical epidemiology, course of diseases | Certain infectious and parasitic diseases                    |                                                              | infectious disease                                                                                  | all ages                             |
| Saita 2013     | [Incidence of Infectious Spondylitis Is Increasing Rapidly : Epidemiological Analysis Using the Japanese Diagnosis Procedure Combination Database]                                                                            | DPC    |                                                                                                                                                | Nationwide | 2007  | 2009 | Clinical epidemiology, course of diseases |                                           | Certain infectious and parasitic diseases                    | Diseases of the musculoskeletal system and connective tissue | Infectious Spondylitis                                                                              |                                      |
| Yasunaga 2010  | Measles-related hospitalizations and complications in Japan, 2007-2008                                                                                                                                                        | DPC    | DPC Research Group                                                                                                                             | Nationwide | 2007  | 2008 | Clinical epidemiology, course of diseases |                                           | Certain infectious and parasitic diseases                    |                                                              | measles and related complicates                                                                     |                                      |
| Tanihara 2010  | Evaluating measles surveillance: comparison of sentinel surveillance, mandatory notification, and data from health insurance claims                                                                                           | Others | several corporate health insurance societies in Aichi Prefecture, sentinel surveillance system, mandatory notification system run by the Aichi | Prefecture | Aichi | 2007 | 2007                                      | Clinical epidemiology, course of diseases | Research methodology                                         | Certain infectious and parasitic diseases                    | measles                                                                                             | age groups                           |
| Yuasa 2019     | Treatment procedures and associated medical costs of methicillin-resistant Staphylococcus aureus infection in Japan: A retrospective analysis using a database of Japanese employment-based health insurance                  | Others | MinaCare database                                                                                                                              | Nationwide | 2010  | 2015 | Medical treatment status                  | Health economics                          | Certain infectious and parasitic diseases                    |                                                              | methicillin-resistant Staphylococcus aureus infection                                               | Others<br>aged ≥15 years             |
| Imai 2020      | Association of the ward pharmacy service with active implementation of therapeutic drug monitoring for vancomycin and teicoplanin-an epidemiological surveillance study using Japanese large health insurance claims database | JMDC   |                                                                                                                                                | Nationwide | 2012  | 2017 | Intervention effect                       | Medical treatment status                  | Certain infectious and parasitic diseases                    |                                                              | MRSA                                                                                                |                                      |
| Uematsu 2018   | Effect of methicillin-resistant Staphylococcus aureus in Japan                                                                                                                                                                | DPC    | QIP: DPC data linked to microbiologic data                                                                                                     | Nationwide | 2014  | 2016 | Clinical epidemiology, course of diseases | Health economics                          | Certain infectious and parasitic diseases                    |                                                              | Methicillin-resistant Staphylococcus aureus                                                         |                                      |
| Uematsu 2017   | Estimating the disease burden of methicillin-resistant Staphylococcus aureus in Japan: Retrospective database study of Japanese hospitals                                                                                     | DPC    |                                                                                                                                                | Nationwide | 2014  | 2015 | Clinical epidemiology, course of diseases | Health economics                          | Certain infectious and parasitic diseases                    |                                                              | MRSA                                                                                                | age categories                       |
| Tanihara 2016  | Estimation of the incidence of MRSA patients: evaluation of a surveillance system using health insurance claim data                                                                                                           | DPC    | and JANIS data                                                                                                                                 | Nationwide | 2011  | 2012 | Clinical epidemiology, course of diseases |                                           | Certain infectious and parasitic diseases                    |                                                              | MRSA                                                                                                |                                      |
| Goto 2014      | [Clinical Evaluation of Therapeutic Drug Monitoring (TDM) on Antibiotic Therapy for Methicillin-resistant Staphylococcus aureus (MRSA) Infection with the Diagnosis Procedure Combination (DPC) System]                       | DPC    |                                                                                                                                                | Nationwide | 2010  | 2010 | Intervention effect                       | Medical treatment status                  | Certain infectious and parasitic diseases                    |                                                              | MRSA                                                                                                |                                      |
| Ueno 2021      | The disease burden of mucormycosis in Japan: results from a systematic literature review and retrospective database study                                                                                                     | MDV    | a systematic literature review                                                                                                                 | Nationwide | 2010  | 2019 | Clinical epidemiology, course of diseases | Health economics                          | Certain infectious and parasitic diseases                    |                                                              | mucormycosis (ICD-10 code: B46.x)                                                                   |                                      |
| Ohfuji 2020    | Mumps-related Disease Burden in Japan: Analysis of JMDC Health Insurance Reimbursement Data for 2005-2017                                                                                                                     | JMDC   |                                                                                                                                                | Nationwide | 2005  | 2017 | Clinical epidemiology, course of diseases |                                           | Certain infectious and parasitic diseases                    |                                                              | mumps                                                                                               | Others<br>3 month-64 year of age     |
| Takagi 2020    | Incidence of Mumps Deafness in Japan, 2005-2017: Analysis of Japanese Insurance Claims Database                                                                                                                               | JMDC   |                                                                                                                                                | Nationwide | 2005  | 2017 | Clinical epidemiology, course of diseases |                                           | Certain infectious and parasitic diseases                    |                                                              | Mumps Deafness                                                                                      | Others<br>3 month-64 year of age     |
| Iwao 2020      | A survey of clarithromycin monotherapy and long-term administration of ethambutol for patients with MAC lung disease in Japan: A retrospective cohort study using the database of health insurance claims                     | JMDC   |                                                                                                                                                | Nationwide | 2005  | 2017 | Medical treatment status                  |                                           | Certain infectious and parasitic diseases                    |                                                              | Mycobacterium avium-intracellulare complex lung disease                                             |                                      |
| Iwao 2020      | Treatment of Mycobacterium avium-intracellulare complex lung disease in the real world: a retrospective big data analysis                                                                                                     | JMDC   |                                                                                                                                                | Nationwide | 2007  | 2017 | Medical treatment status                  |                                           | Certain infectious and parasitic diseases                    |                                                              | Mycobacterium avium-intracellulare complex lung disease                                             | Others<br>0-74 year of age           |
| Izumi 2019     | Epidemiology of Adults and Children Treated for Nontuberculous Mycobacterial Pulmonary Disease in Japan                                                                                                                       | NDB    |                                                                                                                                                | Nationwide | 2009  | 2014 | Clinical epidemiology, course of diseases | Socioeconomic comparison                  | Certain infectious and parasitic diseases                    |                                                              | nontuberculous mycobacterial pulmonary disease (A310 and A319)                                      |                                      |
| Igari 2020     | A retrospective observational study of antimicrobial treatment for non-tuberculous mycobacteria disease using a nationwide claims database in Japan                                                                           | NDB    | Sampling data                                                                                                                                  | Nationwide | 2011  | 2014 | Medical treatment status                  | Quality of care                           | Certain infectious and parasitic diseases                    |                                                              | non-tuberculous mycobacteria                                                                        |                                      |
| Morimoto 2019  | Actual practice of standard treatment for pulmonary nontuberculous mycobacteriosis in Japan                                                                                                                                   | NDB    | national health insurance database                                                                                                             | Nationwide | 2010  | 2014 | Medical treatment status                  |                                           | Certain infectious and parasitic diseases                    |                                                              | nontuberculous mycobacterial pulmonary disease                                                      |                                      |
| Uno 2020       | Comorbidities associated with nontuberculous mycobacterial disease in Japanese adults: a claims-data analysis                                                                                                                 | JMDC   |                                                                                                                                                | Nationwide | 2014  | 2014 | Clinical epidemiology, course of diseases |                                           | Certain infectious and parasitic diseases                    |                                                              | nontuberculous mycobacterial disease                                                                | Others<br>aged 20-75 years           |
| Iwao 2018      | [Survey of Drug Prescription Patterns Among Patients with Nontuberculous Mycobacterial Disease Using the Database of Health Insurance Claims]                                                                                 | JMDC   |                                                                                                                                                | Nationwide | 2015  | 2016 | Medical treatment status                  |                                           | Certain infectious and parasitic diseases                    |                                                              | Nontuberculous Mycobacterial Disease (A310-A319)                                                    |                                      |
| Chang 2018     | The incidence of medically-attended norovirus gastro-enteritis in Japan: Modelling using a medical care insurance claims database                                                                                             | JMDC   |                                                                                                                                                | Nationwide | 2007  | 2015 | Clinical epidemiology, course of diseases |                                           | Certain infectious and parasitic diseases                    |                                                              | norovirus                                                                                           | age group                            |
| Imai 2018      | Risk of pneumococcal diseases in adults with underlying medical conditions: a retrospective, cohort study using two Japanese healthcare databases                                                                             | Others | JMDC, MDV                                                                                                                                      | Nationwide | 2006  | 2014 | Clinical epidemiology, course of diseases |                                           | Certain infectious and parasitic diseases                    |                                                              | Pneumococcal disease                                                                                | Others<br>aged ≥19 years             |

|                        |                                                                                                                                                                                                                       |           |                                                       |              |                                           |      |      |                                           |                                           |                                           |                                                                     |                                                                                |          |                         |
|------------------------|-----------------------------------------------------------------------------------------------------------------------------------------------------------------------------------------------------------------------|-----------|-------------------------------------------------------|--------------|-------------------------------------------|------|------|-------------------------------------------|-------------------------------------------|-------------------------------------------|---------------------------------------------------------------------|--------------------------------------------------------------------------------|----------|-------------------------|
| Shoji 2020             | Recent epidemiology of Pneumocystis pneumonia in Japan                                                                                                                                                                | DPC       |                                                       | Nationwide   |                                           | 2010 | 2016 | Clinical epidemiology, course of diseases |                                           | Certain infectious and parasitic diseases |                                                                     | Pneumocystis pneumonia                                                         |          |                         |
| Inoue 2019             | Adjunctive Corticosteroids decreased the risk of mortality of non-HIV Pneumocystis Pneumonia                                                                                                                          | DPC       |                                                       | Nationwide   |                                           | 2010 | 2016 | Intervention effect                       |                                           | Certain infectious and parasitic diseases |                                                                     | non-HIV Pneumocystis pneumonia                                                 | Others   | ≥18 year of age         |
| Fukuda 2020            | Healthcare resources attributable to methicillin-resistant Staphylococcus aureus orthopedic surgical site infections                                                                                                  | NDB       |                                                       | Nationwide   |                                           | 2012 | 2018 | Health economics                          |                                           | Certain infectious and parasitic diseases | Injury, poisoning and certain other consequences of external causes | Surgical Site Infection (MRSA)                                                 |          |                         |
| Okubo 2018             | Dose-dependent relationships between weight status and clinical outcomes among infants hospitalized with respiratory syncytial virus infections                                                                       | DPC       |                                                       | Nationwide   |                                           | 2010 | 2015 | Clinical epidemiology, course of diseases |                                           | Certain infectious and parasitic diseases | Diseases of the respiratory system                                  | Respiratory syncytial virus (RSV) infection                                    | Children | aged <12 months         |
| Kobayashi 2020         | Sustained reduction in rotavirus-coded hospitalizations in children aged <5 years after introduction of self-financed rotavirus vaccines in Japan                                                                     | JMDC      |                                                       | Nationwide   |                                           | 2009 | 2017 | Clinical epidemiology, course of diseases | Health policy evaluation and utilization  | Certain infectious and parasitic diseases |                                                                     | rotavirus gastroenteritis                                                      | Children | <10 years of age        |
| Kimura 2019            | Passive surveillance of rotavirus gastroenteritis-associated hospitalization using nationwide administrative databases in Japan                                                                                       | Others    | MDV, JMDC                                             | Nationwide   |                                           | 2009 | 2016 | Clinical epidemiology, course of diseases |                                           | Certain infectious and parasitic diseases |                                                                     | rotaviral enteritis                                                            | Children | <6 year of age          |
| Kobayashi 2018         | Decline of rotavirus-coded hospitalizations in children under 5 years: A report from Japan where rotavirus vaccines are self-financed                                                                                 | JMDC      |                                                       | Nationwide   |                                           | 2009 | 2015 | Health policy evaluation and utilization  |                                           | Certain infectious and parasitic diseases |                                                                     | rota virus                                                                     | Children | aged <5 years           |
| Aso 2020               | Dexmedetomidine and Mortality From Sepsis Requiring Mechanical Ventilation: A Japanese Nationwide Retrospective Cohort Study                                                                                          | DPC       |                                                       | Nationwide   |                                           | 2010 | 2016 | Intervention effect                       |                                           | Certain infectious and parasitic diseases |                                                                     | sepsis                                                                         | Others   | aged ≥15 years          |
| Shime 2011             | [Epidemiology of pediatric sepsis in Japanese community hospitals: analysis using a diagnosis procedure combination database]                                                                                         | DPC       | QIP                                                   | Nationwide   |                                           | 2007 | 2007 | Clinical epidemiology, course of diseases | Medical treatment status                  | Certain infectious and parasitic diseases |                                                                     | pediatric sepsis                                                               |          | age group               |
| Fujimori 2020          | [Effects of Polymyxin B Hemoperfusion in Patients with Sepsis Requiring CHDF : Analysis of a Nationwide Administrative Database in Japan]                                                                             | DPC       |                                                       | Nationwide   |                                           | 2016 | 2018 | Intervention effect                       |                                           | Certain infectious and parasitic diseases |                                                                     | Sepsis                                                                         | Others   | aged ≥20 years          |
| Tanihara 2014          | Assessment of medical expenditures for sepsis: differentiating between cases with and without ruled-out diagnoses                                                                                                     | Others    | an employee health insurance organization             | Others       | an employee health insurance organization | 2006 | 2007 | Medical treatment status                  | Health economics                          | Certain infectious and parasitic diseases |                                                                     | sepsis                                                                         |          |                         |
| Fujimori 2021          | Effects of Polymyxin B Hemoperfusion in Patients with Sepsis Requiring Continuous Hemodiafiltration: Analysis of a Nationwide Administrative Database in Japan                                                        | DPC       |                                                       | Nationwide   |                                           | 2016 | 2019 | Intervention effect                       |                                           | Certain infectious and parasitic diseases |                                                                     | sepsis                                                                         | Others   | ≥20 years of age        |
| Edakubo 2020           | Effect of Early Central Venous Catheterization On Mortality Among Patients with Severe Sepsis: A Nationwide Inpatient Database Study                                                                                  | DPC       |                                                       | Nationwide   |                                           | 2014 | 2016 | Intervention effect                       |                                           | Certain infectious and parasitic diseases |                                                                     | severe sepsis                                                                  | Others   | ≥18 year of age         |
| Miyauchi 2012          | Treatment with PMX-DHP improves prognoses of sepsis patients who required treatment with blood purification and is favorable for the medical fees                                                                     | Others    | Social Insurance Hospitals                            | Others       | 30 Social Insurance Hospital              | 2008 | 2011 | Intervention effect                       | Health economics                          | Certain infectious and parasitic diseases |                                                                     | Sepsis                                                                         |          |                         |
| Igari 2020             | A retrospective observational study of antibiotics treatment for sepsis using a nationwide claim database in Japan                                                                                                    | NDB       | Sampling data                                         | Nationwide   |                                           | 2011 | 2014 | Medical treatment status                  | Clinical epidemiology, course of diseases | Certain infectious and parasitic diseases | Others                                                              | antibiotics treatment for sepsis                                               | Others   | aged 15 years and older |
| Ohbe 2019              | Intravenous albumin for initial resuscitation and mortality in septic shock patients: propensity score analyses using a nationwide inpatient database                                                                 | DPC       |                                                       | Nationwide   |                                           | 2010 | 2016 | Intervention effect                       |                                           | Certain infectious and parasitic diseases |                                                                     | septic shock                                                                   | Others   | age ≥20 years           |
| Tagami 2015            | Low-dose corticosteroid treatment and mortality in refractory abdominal septic shock after emergency laparotomy                                                                                                       | DPC       |                                                       | Nationwide   |                                           | 2010 | 2013 | Intervention effect                       |                                           | Certain infectious and parasitic diseases | Diseases of the digestive system                                    | refractory abdominal septic shock after emergency laparotomy                   | Others   | age ≥15 years           |
| Suzuki 2020            | Histamine-2 receptor antagonists versus proton pump inhibitors for septic shock after lower gastrointestinal tract perforation: a retrospective cohort study using a national inpatient database                      | DPC       |                                                       | Nationwide   |                                           | 2010 | 2015 | Intervention effect                       |                                           | Certain infectious and parasitic diseases | Diseases of the digestive system                                    | septic shock after lower gastrointestinal tract                                | Others   | ≥18 year of age         |
| Tagami 2015            | Intravenous immunoglobulin and mortality in pneumonia patients with septic shock: an observational nationwide study                                                                                                   | DPC       |                                                       | Nationwide   |                                           | 2010 | 2013 | Intervention effect                       |                                           | Certain infectious and parasitic diseases | Diseases of the digestive system                                    | pneumonia, septic shock                                                        | Others   | age ≥18 years           |
| Fujimori 2021          | Effects of Polymyxin B Hemoperfusion on Septic Shock Patients Requiring Noradrenaline: Analysis of a Nationwide Administrative Database in Japan                                                                      | DPC       |                                                       | Nationwide   |                                           | 2016 | 2019 | Intervention effect                       |                                           | Certain infectious and parasitic diseases |                                                                     | septic shock                                                                   | Others   | aged ≥20 years          |
| Iwagami 2016           | Potential Survival Benefit of Polymyxin B Hemoperfusion in Septic Shock Patients on Continuous Renal Replacement Therapy: A Propensity-Matched Analysis                                                               | DPC       |                                                       | Nationwide   |                                           | 2007 | 2012 | Intervention effect                       |                                           | Certain infectious and parasitic diseases | Diseases of the genitourinary system                                | Septic shock, Continuous Renal Replacement Therapy                             | Others   | aged ≥18 years          |
| Tagami 2015            | Intravenous immunoglobulin use in septic shock patients after emergency laparotomy                                                                                                                                    | DPC       |                                                       | Nationwide   |                                           | 2010 | 2013 | Intervention effect                       |                                           | Certain infectious and parasitic diseases | Injury, poisoning and certain other consequences of external causes | septic shock, intestinal perforation                                           | Others   | aged 15-89 years        |
| Tanihara 2011          | [Investigation of descriptions of sexually transmitted diseases in medical fee statements]*                                                                                                                           | Others    | multiple health insurance society                     | Nationwide   |                                           | 2006 | 2006 | Clinical epidemiology, course of diseases |                                           | Certain infectious and parasitic diseases |                                                                     | sexually transmitted disease                                                   |          |                         |
| Matsubayashi 2020      | Syphilis testing among spouses of patients with syphilis in Japan: an epidemiological study using an administrative claims database                                                                                   | JMDC      |                                                       | Nationwide   |                                           | 2010 | 2017 | Medical treatment status                  |                                           | Certain infectious and parasitic diseases |                                                                     | syphilis                                                                       | Others   | 20-74 years of age      |
| Nakajima 2018          | Clinical features and outcomes of tetanus: Analysis using a National Inpatient Database in Japan                                                                                                                      | DPC       |                                                       | Nationwide   |                                           | 2010 | 2016 | Clinical epidemiology, course of diseases |                                           | Certain infectious and parasitic diseases |                                                                     | tetanus neonatorum (A33.1), obstetric tetanus (A34.10), or other tetanus (A35) |          |                         |
| Yasunaga 2011          | Delay in tetracycline treatment increases the risk of complications in Tsutsugamushi disease: data from the Japanese Diagnosis Procedure Combination database                                                         | DPC       | DPC Research Group                                    | Nationwide   |                                           | 2007 | 2008 | Clinical epidemiology, course of diseases | Medical treatment status                  | Certain infectious and parasitic diseases |                                                                     | Tsutsugamushi disease (A75.3)                                                  |          |                         |
| Tobise 2010            | [A DRG/PPS simulation in the medical care of tuberculosis]                                                                                                                                                            | Others    | 19 hospitals under the National Hospital Organization | Nationwide   |                                           | 2007 | 2008 | Health economics                          |                                           | Certain infectious and parasitic diseases |                                                                     | tuberculosis                                                                   |          |                         |
| Yamana 2021            | Treatment of latent tuberculosis infection in patients receiving biologic agents                                                                                                                                      | JMDC      |                                                       | Nationwide   |                                           | 2005 | 2018 | Medical treatment status                  |                                           | Certain infectious and parasitic diseases | Others                                                              | immune-mediated inflammatory diseases, tuberculosis                            | Others   | aged 20-64 years        |
| Iba 2020               | Tuberculosis screening and management of latent tuberculosis infection prior to biologic treatment in patients with immune-mediated inflammatory diseases: A longitudinal population-based analysis using claims data | NHI/LSEHS | NHI                                                   | Municipality | C city, Tokyo prefecture                  | 2012 | 2019 | Medical treatment status                  | Quality of care                           | Certain infectious and parasitic diseases | Others                                                              | immunemediated inflammatory diseases, Tuberculosis                             | Others   | 15-74 year of age       |
| Yamada 2021            | Pneumococcal vaccine coverage in Japan among patients with a history of splenectomy: Results of a retrospective administrative database study                                                                         | JMDC      |                                                       | Nationwide   |                                           | 2005 | 2019 | Medical treatment status                  |                                           | Certain infectious and parasitic diseases | Others                                                              | overwhelming post-splenectomy infection                                        | Others   | aged 2-64 years         |
| Nakamura 2015          | Evaluation of the Number of Varicella Patients Estimated by Prescription Surveillance                                                                                                                                 | NDB       | Aggregated data: Prescription Surveillance            | Nationwide   |                                           | 2010 | 2013 | Clinical epidemiology, course of diseases | Research methodology                      | Certain infectious and parasitic diseases |                                                                     | Varicella                                                                      |          |                         |
| Sugawara 2011          | [Chickenpox case estimation in acyclovir pharmacy survey and early bioterrorism detection]                                                                                                                            | Others    | Pharmacy surveillance                                 | Nationwide   |                                           | 2010 | 2010 | Clinical epidemiology, course of diseases |                                           | Certain infectious and parasitic diseases |                                                                     | chickenpox                                                                     |          | age groups              |
| 2) Neoplasms (C00-D48) |                                                                                                                                                                                                                       |           |                                                       |              |                                           |      |      |                                           |                                           |                                           |                                                                     |                                                                                |          |                         |

|                 |                                                                                                                                                                                                                      |        |                                                                                                       |            |                                 |      |                                           |                                          |                                           |                                                                     |                                                                                                                                                                                                      |               |                                                  |
|-----------------|----------------------------------------------------------------------------------------------------------------------------------------------------------------------------------------------------------------------|--------|-------------------------------------------------------------------------------------------------------|------------|---------------------------------|------|-------------------------------------------|------------------------------------------|-------------------------------------------|---------------------------------------------------------------------|------------------------------------------------------------------------------------------------------------------------------------------------------------------------------------------------------|---------------|--------------------------------------------------|
| Yanahara 2011   | [Current state of surgical therapy for adrenal tumors based on DPC data from 2006 to 2008: A comparison between urology and surgery]*                                                                                | DPC    | DPC Research Group                                                                                    | Nationwide | 2006                            | 2008 | Medical treatment status                  |                                          | Neoplasms                                 |                                                                     | adrenalectomy cases                                                                                                                                                                                  |               |                                                  |
| Okamoto 2013    | Prevalence of bile duct cancer among printing industry workers in comparison with other industries                                                                                                                   | JHIA   | Japan Health Insurance Association (JHIA)                                                             | Nationwide | 2009                            | 2012 | Clinical epidemiology, course of diseases |                                          | Neoplasms                                 |                                                                     | Bile Duct Cancer (C22.1 and C24.0)                                                                                                                                                                   |               |                                                  |
| Sugihara 2014   | Comparison of perioperative outcomes including severe bladder injury between monopolar and bipolar transurethral resection of bladder tumors: a population based comparison                                          | DPC    |                                                                                                       | Nationwide | 2007                            | 2012 | Intervention effect                       |                                          | Neoplasms                                 | Injury, poisoning and certain other consequences of external causes | bladder tumor, bladder injury                                                                                                                                                                        |               |                                                  |
| Shinjo 2019     | Volume effect in paediatric brain tumour resection surgery: analysis of data from the Japanese national inpatient database                                                                                           | DPC    |                                                                                                       | Nationwide | 2012                            | 2016 | Clinical epidemiology, course of diseases | Health policy evaluation and utilization | Neoplasms                                 |                                                                     | brain tumour                                                                                                                                                                                         | Children      | aged 15 years old and younger                    |
| Uchida 2012     | Impact of remifentanyl use on early postoperative outcomes following brain tumor resection or rectal cancer surgery                                                                                                  | DPC    |                                                                                                       | Nationwide | 2007                            | 2007 | Intervention effect                       |                                          | Neoplasms                                 |                                                                     | brain tumor or rectal cancer                                                                                                                                                                         |               |                                                  |
| Yoshimoto 2016  | Current Trends and Healthcare Resource Usage in the Hospital Treatment of Primary Malignant Brain Tumor in Japan: A National Survey Using the Diagnostic Procedure Combination Database (J-ASPECT Study-Brain Tumor) | DPC    | J-ASPECT Study-Brain Tumor                                                                            | Nationwide | 2013                            | 2014 | Medical treatment status                  | Health economics                         | Neoplasms                                 |                                                                     | primary malignant brain tumors                                                                                                                                                                       |               |                                                  |
| Yoshimoto 2015  | Visionary approach for the treatment of brain tumors                                                                                                                                                                 | DPC    | J-ASPECT Study                                                                                        | Nationwide | 2013                            | 2014 | Clinical epidemiology, course of diseases | Medical treatment status                 | Neoplasms                                 |                                                                     | brain tumors                                                                                                                                                                                         |               |                                                  |
| Moriwaki 2021   | Economic Evaluation of First-Line Pertuzumab Therapy in Patients with HER2-Positive Metastatic Breast Cancer in Japan                                                                                                | JMDC   | CLEOPATRA trial, published sources                                                                    | Nationwide | 2005                            | 2017 | Health economics                          |                                          | Neoplasms                                 |                                                                     | receptor-2 (HER2)-positive breast cancer                                                                                                                                                             | Others        | elderly people (aged >75 years) are not included |
| Tajima 2021     | Real-world anticancer medications for reproductive-age women with breast cancer by using a claims database in Japan                                                                                                  | JMDC   |                                                                                                       | Nationwide | 2005                            | 2018 | Medical treatment status                  |                                          | Neoplasms                                 |                                                                     | Breast cancer (ICD-10code: C50)                                                                                                                                                                      | Others        | reproductive age (15 to 49 years)                |
| Ishii 2020      | Epidemiology and practice patterns for male breast cancer compared with female breast cancer in Japan                                                                                                                | DPC    | HBCR+DPC                                                                                              | Nationwide | 2012                            | 2015 | Clinical epidemiology, course of diseases | Medical treatment status                 | Neoplasms                                 |                                                                     | breast cancer patients (ICD-O-3)                                                                                                                                                                     |               |                                                  |
| Matsumoto 2020  | Association between variations in the number of hospital beds and inpatient chemo/radiotherapy for breast cancer: a study using a large claim database                                                               | DPC    |                                                                                                       | Nationwide | 2012                            | 2016 | Health policy evaluation and utilization  |                                          | Neoplasms                                 |                                                                     | breast cancer patients                                                                                                                                                                               |               |                                                  |
| Sakata 2019     | Use of a Healthcare Claims Database for Post-Marketing Safety Assessments of Eribulin in Japan: A Comparative Assessment with a Prospective Post-Marketing Surveillance Study                                        | MDV    |                                                                                                       | Nationwide | 2011                            | 2016 | Health policy evaluation and utilization  |                                          | Neoplasms                                 |                                                                     | breast cancer                                                                                                                                                                                        |               |                                                  |
| Sato 2015       | The accuracy of Japanese claims data in identifying breast cancer cases                                                                                                                                              | Others | claims data, standardized hospital-based cancer registry                                              | Others     | a single institution            | 2011 | 2011                                      | Research methodology                     | Neoplasms                                 |                                                                     | breast cancer                                                                                                                                                                                        | Others        |                                                  |
| Goto 2017       | Cost analysis of leuporelin acetate in Japanese pre-menopausal breast-cancer patients: comparison between 6-month and 3-month depot formulations                                                                     | MDV    | web-based survey to determine the intangible costs                                                    | Nationwide | 2008                            | 2016 | Health economics                          |                                          | Neoplasms                                 |                                                                     | pre-menopausal breast cancer                                                                                                                                                                         |               |                                                  |
| Iwagami 2021    | Risk of Cancer in Association with Ranitidine and Nizatidine vs Other H2 Blockers: Analysis of the Japan Medical Data Center Claims Database 2005-2018                                                               | JMDC   |                                                                                                       | Nationwide | 2005                            | 2018 | Intervention effect                       |                                          | Neoplasms                                 |                                                                     | ICD-10 C00-C96 (excluding C44)                                                                                                                                                                       | Others        | excluded patients aged < 18 years                |
| Makito 2020     | Volatile versus Total Intravenous Anesthesia for Cancer Prognosis in Patients Having Digestive Cancer Surgery                                                                                                        | DPC    |                                                                                                       | Nationwide | 2010                            | 2018 | Intervention effect                       |                                          | Neoplasms                                 |                                                                     | patients having digestive cancer surgery                                                                                                                                                             | Others        | age of greater than or equal to 18 yr            |
| Morishima 2020  | Geriatric assessment domains to predict overall survival in older cancer patients: An analysis of functional status, comorbidities, and nutritional status as prognostic factors                                     | DPC    | Osaka Cancer Registry + DPC                                                                           | Prefecture | Osaka                           | 2010 | 2014                                      | Prediction model                         | Clinical epidemiology, course of diseases | Neoplasms                                                           | gastric, colorectal, and lung cancer (ICD-O-3: C16, C18, C19, C20, C33, C34)                                                                                                                         | Older persons | patients aged 70 years or older                  |
| Okuyama 2020    | Usability of Clinical Information in Discharge Summary Data in the Diagnosis Procedure Combination Survey for Cancer Patients                                                                                        | DPC    | HBCR + DPC                                                                                            | Nationwide | 2012                            | 2014 | Research methodology                      |                                          | Neoplasms                                 |                                                                     | stomach, colorectal, liver, lung, or breast cancer                                                                                                                                                   | Others        | over the age of 20 years                         |
| Yazaki 2020     | High hepatitis B virus screening rate among patients receiving systemic anticancer treatment in Japan                                                                                                                | DPC    | Hospital-based Cancer Registries + DPC                                                                | Nationwide | 2013                            | 2015 | Medical treatment status                  |                                          | Neoplasms                                 |                                                                     | patients diagnosed with cancer                                                                                                                                                                       | Others        | aged 20 and older                                |
| Morishima 2020  | [Proportion of cancer detected by screening and early-stage cancer among cancer patients by type of medical insurance and family members.]                                                                           | DPC    | Osaka Cancer Registry + DPC                                                                           | Prefecture | Osaka                           | 2010 | 2015                                      | Socioeconomic comparison                 |                                           | Neoplasms                                                           | stomach cancer, colon cancer, lung cancer, oropharyngeal cancer, hypopharyngeal cancer, laryngeal cancer, and nasal/paranasal sinus cancer (ICD10 codes: C00 - C06, C09 - C14, C30.0, C31, and C32)  | Others        | aged 40-59 years (cervical cancer: 20-59 years)  |
| Bun 2019        | Analysis of concordance with antiemetic guidelines in pediatric, adolescent, and young adult patients with cancer using a large-scale administrative database                                                        | DPC    |                                                                                                       | Nationwide | 2010                            | 2016 | Quality of care                           |                                          | Neoplasms                                 |                                                                     | patients who were diagnosed with any cancer (ICD10 codes: C00-D48)                                                                                                                                   | Others        | age <30 years                                    |
| Ishimaru 2019   | Association between perioperative oral care and postoperative pneumonia after cancer resection: conventional versus high-dimensional propensity score matching analysis                                              | JMDC   |                                                                                                       | Nationwide | 2014                            | 2015 | Intervention effect                       |                                          | Neoplasms                                 |                                                                     | head and neck, lung, gastric, colorectal, breast, and esophageal cancer                                                                                                                              |               |                                                  |
| Momo 2019       | Assessment of "look-alike" packaging designs related to medication errors using information technology                                                                                                               | JMDC   |                                                                                                       | Nationwide | 2016                            | 2016 | Medical treatment status                  |                                          | Neoplasms                                 |                                                                     | cancer patients                                                                                                                                                                                      | Others        | aged 0-74 years                                  |
| Yamada 2019     | A descriptive epidemiological study on the treatment options for head and neck cancer: Transition before and after approval of cetuximab                                                                             | MDV    |                                                                                                       | Nationwide | 2008                            | 2015 | Medical treatment status                  | Health policy evaluation and utilization | Neoplasms                                 |                                                                     | lip and oral cancer, nasopharyngeal cancer, oropharyngeal cancer, hypopharyngeal cancer, laryngeal cancer, and nasal/paranasal sinus cancer (ICD10 codes: C00 - C06, C09 - C14, C30.0, C31, and C32) |               |                                                  |
| Yokoyama 2019   | Integrative analysis of clinical and bioinformatics databases to identify anticancer properties of digoxin                                                                                                           | JMDC   |                                                                                                       | Nationwide | 2005                            | 2015 | Intervention effect                       |                                          | Neoplasms                                 |                                                                     | gastric cancer, colorectal cancer, prostate cancer and haematological malignancy                                                                                                                     |               |                                                  |
| Ishimaru 2018   | Preoperative oral care and effect on postoperative complications after major cancer surgery                                                                                                                          | NDB    |                                                                                                       | Nationwide | 2012                            | 2015 | Intervention effect                       |                                          | Neoplasms                                 |                                                                     | head and neck ,oesophageal,gastric,colorectal,lung or liver cancer                                                                                                                                   | Others        | Those aged <18 years were excluded               |
| Sato 2018       | Prevalence and initial prescription of psychotropics in patients with common cancers in Japan, based on a nationwide health insurance claims database                                                                | JMDC   |                                                                                                       | Nationwide | 2009                            | 2014 | Medical treatment status                  |                                          | Neoplasms                                 |                                                                     | breast, colorectal, liver, lung, ovarian, pancreatic, prostate, or stomach cancer                                                                                                                    | Others        | aged ≥18 years                                   |
| Sato 2018       | End-of-life care for cancer patients in Japanese acute care hospitals: A nationwide retrospective administrative database survey                                                                                     | DPC    |                                                                                                       | Nationwide | 2011                            | 2014 | Medical treatment status                  |                                          | Neoplasms                                 |                                                                     | malignant neoplasm (C00-97)                                                                                                                                                                          | Others        | age ≥20 years                                    |
| Urushiyama 2018 | Effect of Hangehashin-To (Japanese Herbal Medicine Tj-14) on Tolerability of Irinotecan: Propensity Score and Instrumental Variable Analyses                                                                         | DPC    |                                                                                                       | Nationwide | 2010                            | 2016 | Intervention effect                       |                                          | Neoplasms                                 |                                                                     | patients with a diagnosis of neoplasm defined by ICD10                                                                                                                                               |               |                                                  |
| Matsuda 2018    | [Big data analysis of medical and nursing care: An examination of days of the week for cancer outpatient chemotherapy]*                                                                                              | Others | Japan Health Insurance Association, National Health Insurance, Latter-stage elderly healthcare system | Others     | A municipality in Western Japan | 2013 | 2015                                      | Medical treatment status                 |                                           | Neoplasms                                                           | patients received outpatient chemotherapy                                                                                                                                                            |               |                                                  |

|                |                                                                                                                                                                                                                                                                |           |                                                                   |              |                                               |      |      |                                           |                                           |           |                                                                                                                                                             |          |                                  |
|----------------|----------------------------------------------------------------------------------------------------------------------------------------------------------------------------------------------------------------------------------------------------------------|-----------|-------------------------------------------------------------------|--------------|-----------------------------------------------|------|------|-------------------------------------------|-------------------------------------------|-----------|-------------------------------------------------------------------------------------------------------------------------------------------------------------|----------|----------------------------------|
| Okuyama 2017   | Prescription of Prophylactic Antiemetic Drugs for Patients Receiving Chemotherapy With Minimal and Low Emetic Risk                                                                                                                                             | DPC       | linked with the hospital-based cancer registry                    | Nationwide   |                                               | 2010 | 2012 | Medical treatment status                  |                                           | Neoplasms | breast, lung, colorectal, stomach, cervical, or prostate cancer                                                                                             | Others   | 20 years older                   |
| Ikedo 2016     | Screening rate for hepatitis B virus infection in patients undergoing chemotherapy in Japan                                                                                                                                                                    | JMDC      |                                                                   | Nationwide   |                                               | 2008 | 2013 | Medical treatment status                  |                                           | Neoplasms | cancer patients scheduled for chemotherapy                                                                                                                  |          |                                  |
| Iwamoto 2016   | Monitoring and evaluating the quality of cancer care in Japan using administrative claims data                                                                                                                                                                 | DPC       | HBCR+DPC                                                          | Nationwide   |                                               | 2010 | 2012 | Quality of care                           |                                           | Neoplasms | colorectal, lung, stomach, liver, breast, prostate and cervical cancer patients                                                                             |          |                                  |
| Kunisawa 2016  | Reducing Length of Hospital Stay Does Not Increase Readmission Rates in Early-Stage Gastric, Colon, and Lung Cancer Surgical Cases in Japanese Acute Care Hospitals                                                                                            | DPC       |                                                                   | Nationwide   |                                               | 2010 | 2014 | Quality of care                           |                                           | Neoplasms | gastric, colon, and lung cancer surgical patients                                                                                                           |          |                                  |
| Takada 2016    | Inverse Association between Sodium Channel-Blocking Antiepileptic Drug Use and Cancer: Data Mining of Spontaneous Reporting and Claims Databases                                                                                                               | JMDC      |                                                                   | Nationwide   |                                               | 2005 | 2014 | Intervention effect                       |                                           | Neoplasms | bladder cancer, lung cancer, pancreatic cancer, gastric cancer, esophageal cancer, hematological malignancies, melanoma, breast cancer, and prostate cancer |          |                                  |
| Takaoka 2016   | Staging discrepancies between Hospital-Based Cancer Registry and Diagnosis Procedure Combination data                                                                                                                                                          | DPC       | HBCR and DPC                                                      | Others       | four voluntarily participating hospitals      | 2011 | 2011 | Research methodology                      |                                           | Neoplasms | tumor-node-metastasis classification                                                                                                                        |          |                                  |
| Tsukada 2016   | Patterns of prescribing radiotherapy and bevacizumab in nationwide practice-analysis of 101 designated cancer care hospitals in Japan                                                                                                                          | DPC       | HBCR+DPC                                                          | Nationwide   |                                               | 2011 | 2012 | Medical treatment status                  |                                           | Neoplasms | patients who received both externalbeam radiotherapy and bevacizumab                                                                                        |          |                                  |
| Uda 2016       | [The current status of cancer rehabilitation in Japan : an analysis from diagnosis procedure combination database]                                                                                                                                             | DPC       |                                                                   | Nationwide   |                                               | 2011 | 2014 | Medical treatment status                  | Health policy evaluation and utilization  | Neoplasms | cancer rehabilitation                                                                                                                                       |          |                                  |
| Sato 2016      | [A Preliminary Survey to Measure the Quality Indicators of End-of-life Cancer Care Using the Japanese National Database]                                                                                                                                       | NDB       | Sampling data                                                     | Nationwide   |                                               | 2012 | 2012 | Quality of care                           | Research methodology                      | Neoplasms | cancer patients                                                                                                                                             | Others   | excluded patients aged <20 years |
| Fujimoto 2015  | Association between statin use and cancer: data mining of a spontaneous reporting database and a claims database                                                                                                                                               | JMDC      |                                                                   | Nationwide   |                                               | 2005 | 2013 | Intervention effect                       |                                           | Neoplasms | lung cancer, pancreatic cancer, gastric cancer, esophageal cancer, breast cancer, hematological malignancies, melanoma, and prostate cancer                 |          |                                  |
| Iwamoto 2015   | Accuracy of using Diagnosis Procedure Combination administrative claims data for estimating the amount of opioid consumption among cancer patients in Japan                                                                                                    | DPC       | compared with electronic medical records                          | Others       | Aomori Prefectural Central Hospital           | 2012 | 2013 | Research methodology                      |                                           | Neoplasms | opioid consumption among cancer patients                                                                                                                    |          |                                  |
| Tanaka 2015    | [Cancer treatment situation in Japan with regard to the type of medical facility using medical claim data of Health Insurance Societies]                                                                                                                       | JMDC      |                                                                   | Nationwide   |                                               | 2005 | 2011 | Patient health service utilization        |                                           | Neoplasms | stomach, colon, liver, lung, or breast cancer                                                                                                               |          |                                  |
| Morishima 2014 | Association of healthcare expenditures with aggressive versus palliative care for cancer patients at the end of life: a cross-sectional study using claims data in Japan                                                                                       | NHI/LSEHS | National Health Insurance (NHI) and Long Life Medical Care System | Prefecture   | Kyoto                                         | 2009 | 2010 | Health economics                          |                                           | Neoplasms | Lung, Stomach, Pancreas, Prostate, Breast, Colorectum, Liver, Biliary tract, blood, Other                                                                   |          |                                  |
| Okuyama 2014   | Prescription trends of prophylactic antiemetics for chemotherapy-induced nausea and vomiting in Japan                                                                                                                                                          | JMDC      |                                                                   | Nationwide   |                                               | 2005 | 2011 | Medical treatment status                  |                                           | Neoplasms | those who received chemotherapy with high or moderate emetic risks                                                                                          | Others   | patients 18 years old or older   |
| Shibata 2014   | [Usefulness of a healthcare insurance claims database for statistical data in cancer patients]*                                                                                                                                                                | NDB       | Patient Survey (MHLW)                                             | Nationwide   |                                               | 2010 | 2011 | Research methodology                      | Clinical epidemiology, course of diseases | Neoplasms | cancer patients                                                                                                                                             |          |                                  |
| Watanabe 2014  | [Estimating duplicate registration rates in hospital cancer registries]*                                                                                                                                                                                       | JMDC      |                                                                   | Nationwide   |                                               | 2005 | 2010 | Clinical epidemiology, course of diseases | Research methodology                      | Neoplasms | lung, stomach, liver, breast, colon cancer                                                                                                                  |          |                                  |
| Morishima 2013 | Impact of hospital case volume on quality of end-of-life care in terminal cancer patients                                                                                                                                                                      | NHI/LSEHS | National Health Insurance (NHI) and Long Life Medical Care System | Prefecture   | Kyoto                                         | 2009 | 2010 | Quality of care                           | Health policy evaluation and utilization  | Neoplasms | died of cancers                                                                                                                                             |          |                                  |
| Nakamura 2013  | Pattern of prophylaxis administration for chemotherapy-induced nausea and vomiting: an analysis of city-based health insurance data                                                                                                                            | NHI/LSEHS | a city-based insurance program                                    | Municipality | Kure city, Hiroshima                          | 2008 | 2010 | Medical treatment status                  |                                           | Neoplasms | who received any of these chemotherapy drugs                                                                                                                | Others   | age 20 or older and under 75     |
| Hamada 2013    | [Application of Japanese Claims Database to Pharmacovigilance Activity in Pharmaceutical Industry: Analysis on Cancer Incidences and Usage of Anticancer Agents]                                                                                               | JMDC      |                                                                   | Nationwide   |                                               | 2011 | 2011 | Health policy evaluation and utilization  |                                           | Neoplasms | cancer patients                                                                                                                                             |          |                                  |
| Higashi 2012   | Prevalence of analgesic prescriptions among patients with cancer in Japan: an analysis of health insurance claims data                                                                                                                                         | JMDC      |                                                                   | Nationwide   | from 8 employer-sponsored insurance companies | 2005 | 2009 | Medical treatment status                  |                                           | Neoplasms | breast, colorectal, stomach, lung, and liver cancers                                                                                                        | Others   | below 75 years old               |
| Yasunaga 2012  | Variation in cancer surgical outcomes associated with physician and nurse staffing: a retrospective observational study using the Japanese Diagnosis Procedure Combination Database                                                                            | DPC       |                                                                   | Nationwide   |                                               | 2007 | 2008 | Health policy evaluation and utilization  |                                           | Neoplasms | lung, esophageal, gastric, colorectal, and pancreatic cancer                                                                                                |          |                                  |
| Maeda 2012     | [Data Analysis Method for More Efficient Integration of Cancer Treatment Centers and Secondary Medical Service Areas]                                                                                                                                          | NHI/LSEHS | Fukuoka                                                           | Prefecture   | Fukuoka                                       | 2008 | 2010 | Health policy evaluation and utilization  |                                           | Neoplasms | gastric, colorectal, liver, lung and breast cancers                                                                                                         |          |                                  |
| Kuroda 2020    | Survey on off-label use of antineoplastic agents in pediatric patients using a large-scale medical database in Japan                                                                                                                                           | MDV       |                                                                   | Nationwide   |                                               | 2016 | 2017 | Medical treatment status                  |                                           | Neoplasms | off-label use of antineoplastic agents in pediatric patients                                                                                                | Children | 0-14 years of age                |
| Minoura 2018   | Practice Patterns of Medications for Patients With Malignant Bowel Obstruction Using a Nationwide Claims Database and the Association Between Treatment Outcomes and Concomitant Use of H2-Blockers/Proton Pump Inhibitors and Corticosteroids With Octreotide | MDV       |                                                                   | Nationwide   |                                               | 2010 | 2015 | Medical treatment status                  | Intervention effect                       | Neoplasms | malignant bowel obstruction impairs, intraabdominal cancers                                                                                                 | Others   | aged ≥20 years                   |

|                |                                                                                                                                                                                                                     |      |                                                            |            |         |      |                                           |                                           |                          |                                                                                                     |                                                                                                                                      |                                       |                                               |  |
|----------------|---------------------------------------------------------------------------------------------------------------------------------------------------------------------------------------------------------------------|------|------------------------------------------------------------|------------|---------|------|-------------------------------------------|-------------------------------------------|--------------------------|-----------------------------------------------------------------------------------------------------|--------------------------------------------------------------------------------------------------------------------------------------|---------------------------------------|-----------------------------------------------|--|
| Sughara 2013   | Regional, institutional and individual factors affecting selection of minimally invasive nephroureterectomy in Japan: a national database analysis                                                                  | DPC  |                                                            | Nationwide | 2007    | 2010 | Medical treatment status                  | Socioeconomic comparison                  | Neoplasms                |                                                                                                     | nephroureterectomy, malignant neoplasms of the renal pelvis or ureter                                                                |                                       |                                               |  |
| Mimura 2020    | Antimicrobial utilization and antimicrobial resistance in patients with haematological malignancies in Japan: a multi-centre cross-sectional study                                                                  | DPC  | JANIS data                                                 | Nationwide | 2015    | 2017 | Medical treatment status                  |                                           | Neoplasms                | Certain infectious and parasitic diseases                                                           | haematological malignancies, antimicrobials                                                                                          |                                       |                                               |  |
| Kishi 2020     | Impact of Behavioral Health Comorbidities on Health Care Costs Among Japanese Patients With Cancer                                                                                                                  | JMDC |                                                            | Nationwide | 2014    | 2015 | Health economics                          |                                           | Neoplasms                | Mental, Behavioral and Neurodevelopmental disorders                                                 | Cancer, behavioural health                                                                                                           |                                       |                                               |  |
| Morita 2017    | Association between Nurse Staffing and In-Hospital Bone Fractures: A Retrospective Cohort Study                                                                                                                     | DPC  |                                                            | Nationwide | 2010    | 2014 | Health policy evaluation and utilization  |                                           | Neoplasms                | Diseases of the circulatory system                                                                  | cancer or cardiovascular diseases                                                                                                    | Others                                | aged 50 years or older                        |  |
| Yamaji 2016    | Association Between Colorectal Cancer and Atherosclerotic Diseases: A Study Using a National Inpatient Database in Japan                                                                                            | DPC  |                                                            | Nationwide | 2010    | 2012 | Clinical epidemiology, course of diseases |                                           | Neoplasms                | Diseases of the circulatory system                                                                  | Colorectal cancer and atherosclerotic diseases                                                                                       |                                       | age groups                                    |  |
| Akechi 2020    | Treatment of Major Depressive Disorder in Japanese Patients with Cancer: A Matched Cohort Study Using Employer-Based Health Insurance Claims Data                                                                   | JMDC |                                                            | Nationwide | 2012    | 2017 | Medical treatment status                  |                                           | Neoplasms                | Mental, Behavioral and Neurodevelopmental disorders                                                 | 1) Newly diagnosis with cancer (ICD10: C00-95), 2) major depressive disorder (F32 F33)                                               | Others                                | adult (aged 18-74 years)                      |  |
| Akechi 2020    | Risk of major depressive disorder in spouses of cancer patients in Japan: A cohort study using health insurance-based claims data                                                                                   | JMDC |                                                            | Nationwide | 2011    | 2018 | Clinical epidemiology, course of diseases | Others                                    | Neoplasms                | Mental, Behavioral and Neurodevelopmental disorders                                                 | 1) cancer (ICD10: C00-95), 2) major depressive disorder (F32 F33)                                                                    |                                       |                                               |  |
| Akechi 2020    | Risk of major depressive disorder in Japanese cancer patients: A matched cohort study using employer-based health insurance claims data                                                                             | JMDC |                                                            | Nationwide | 2012    | 2017 | Clinical epidemiology, course of diseases |                                           | Neoplasms                | Mental, Behavioral and Neurodevelopmental disorders                                                 | 1) new diagnosis of cancer, 2) major depressive disorder (F32 F33)                                                                   | Others                                | adult (aged 18-74 years)                      |  |
| Muramatsu 2013 | Do the Japanese Cancer Patients Receive an Appropriate Psychiatric Support at the Acute Care Hospitals?: An Evaluation Trial by DPC Based Data                                                                      | DPC  |                                                            | Nationwide | 2010    | 2010 | Medical treatment status                  | Clinical epidemiology, course of diseases | Neoplasms                | Mental, Behavioral and Neurodevelopmental disorders                                                 | breast cancer, depression and anxiety symptom (as comorbidity or complication)                                                       |                                       |                                               |  |
| Matsuda 2010   | [Cancer and psychiatric care: From the results of a study based on DPC data]*                                                                                                                                       | DPC  | DPC Research Group                                         | Nationwide | 2008    | 2008 | Medical treatment status                  | Clinical epidemiology, course of diseases | Neoplasms                | Mental, Behavioral and Neurodevelopmental disorders                                                 | breast cancer, depressive disorders                                                                                                  |                                       |                                               |  |
| Taniguchi 2021 | Recombinant Thrombomodulin in Disseminated Intravascular Coagulation Associated with Stage IV Solid Tumors: A Nationwide Observational Study in Japan                                                               | DPC  |                                                            | Nationwide | 2010    | 2018 | Intervention effect                       |                                           | Neoplasms                | Diseases of the blood and blood-forming organs and certain disorders involving the immune mechanism | disseminated intravascular coagulation, solid tumors                                                                                 | Others                                | aged ≥18 years                                |  |
| Kobayashi 2015 | The effect of centralization of health care services on travel time and its equality                                                                                                                                | JHIA | the Kyoto branch of the Japan Health Insurance Association | Prefecture | Kyoto   | 2008 | 2009                                      | Health policy evaluation and utilization  |                          | Neoplasms                                                                                           | Diseases of the circulatory system                                                                                                   | ischemic heart disease, breast cancer |                                               |  |
| Kaneko 2020    | Association of cancer with outcomes in patients hospitalized for heart failure                                                                                                                                      | DPC  |                                                            | Nationwide | 2010    | 2018 | Clinical epidemiology, course of diseases |                                           | Neoplasms                | Diseases of the circulatory system                                                                  | heart failure (HF) patients with concomitant cancer                                                                                  | Others                                | aged ≥20 years                                |  |
| Mizuno 2021    | Differences in aggressive treatments during the actively dying phase in patients with cancer and heart disease: an exploratory study using the sampling dataset of the National Database of Health Insurance Claims | NDB  | Sampling data: limited to DPC dataset                      | Nationwide | 2011    | 2015 | Medical treatment status                  |                                           | Neoplasms                | Diseases of the circulatory system                                                                  | cancer and heart disease (aggressive treatments)                                                                                     |                                       |                                               |  |
| Inaida 2020    | Previous Infection Positively Correlates to the Tumor Incidence Rate of Patients with Cancer                                                                                                                        | JMDC |                                                            | Nationwide | 2005    | 2012 | Clinical epidemiology, course of diseases |                                           | Neoplasms                | Certain infectious and parasitic diseases                                                           | 1) The case group was people who presented with malignant cancer. 2) influenza, gastroenteritis, hepatitis, and pneumonia infections | Others                                | patients ≥30 years of age                     |  |
| Sughara 2015   | Perioperative Outcome Comparisons Between Open and Laparoscopic Nephroureterectomy Among a Population-Based Cohort from 2010 to 2012                                                                                | DPC  |                                                            | Nationwide | 2010    | 2012 | Intervention effect                       | Health economics                          | Neoplasms                | Diseases of the genitourinary system                                                                | nephroureterectomy for malignant diseases                                                                                            |                                       |                                               |  |
| Sato 2017      | Mortality and hemorrhagic complications associated with radiofrequency ablation for treatment of hepatocellular carcinoma in patients on hemodialysis for end-stage renal disease: A nationwide survey              | DPC  |                                                            | Nationwide | 2010    | 2012 | Clinical epidemiology, course of diseases | Intervention effect                       | Neoplasms                | Diseases of the genitourinary system                                                                | end-stage renal disease, hepatocellular carcinoma                                                                                    |                                       |                                               |  |
| Watanabe 2018  | Quality indicators for cervical cancer care in Japan                                                                                                                                                                | DPC  | HBCR + DPC                                                 | Nationwide | 2012    | 2014 | Quality of care                           |                                           | Neoplasms                |                                                                                                     | patients with cervical cancer (ICD-O morphology: C53.0-53.9)                                                                         |                                       |                                               |  |
| Kobayashi 2020 | [Incidence of Proteinuria among Japanese Colorectal Cancer Patients after Receiving Ramucicromab-Cohort Study Using Claim Database]                                                                                 | MDV  |                                                            | Nationwide | 2015    | 2018 | Intervention effect                       |                                           | Neoplasms                |                                                                                                     | Colorectal cancer patients (ICD10: C18-20)                                                                                           | Others                                | patients aged 18 years or older               |  |
| Nakashima 2020 | Effectiveness and Safety of Regorafenib vs. Trifludine/Tipiracil in Unresectable Colorectal Cancer: A Retrospective Cohort Study                                                                                    | MDV  |                                                            | Nationwide | 2013    | 2018 | Intervention effect                       |                                           | Neoplasms                |                                                                                                     | metastatic colorectal cancer                                                                                                         | Others                                | aged over 20 years                            |  |
| Tajima 2020    | Open colectomy vs. laparoscopic colectomy in Japan: a retrospective study using real-world data from the diagnosis procedure combination database                                                                   | DPC  |                                                            | Nationwide | 2014    | 2016 | Intervention effect                       |                                           | Neoplasms                |                                                                                                     | colorectal cancer (ICD10: C18 C19)                                                                                                   |                                       |                                               |  |
| Watanabe 2020  | Preoperative rehabilitation for patients undergoing colorectal cancer surgery: a retrospective cohort study                                                                                                         | DPC  |                                                            | Nationwide | 2014    | 2017 | Intervention effect                       |                                           | Neoplasms                |                                                                                                     | colorectal cancer C18-20 (ICD10)                                                                                                     |                                       |                                               |  |
| Nakashima 2019 | Comparison of Standard Initial Dose and Reduced Initial Dose Regorafenib for Colorectal Cancer Patients: A Retrospective Cohort Study                                                                               | MDV  |                                                            | Nationwide | 2013    | 2018 | Intervention effect                       |                                           | Neoplasms                |                                                                                                     | colorectal cancer                                                                                                                    | Others                                | aged over 20 years                            |  |
| Yamazaki 2018  | Pre-emptive skin treatments to prevent skin toxicity caused by anti-EGFR antibody: the real-world evidence in Japan                                                                                                 | MDV  |                                                            | Nationwide | 2008    | 2017 | Medical treatment status                  |                                           | Neoplasms                |                                                                                                     | colorectal cancer (ICD10: C18 C19 C20)                                                                                               |                                       |                                               |  |
| Wei 2018       | [The Diffusion Rate and Regional Difference of the Insured with Colorectal Cancer Outpatient Chemotherapy in Fukuoka Branch of Japan Health Insurance Association (FBJHIA)]                                         | JHIA | Fukuoka Branch, National Health Insurance Association      | Prefecture | Fukuoka | 2014 | 2015                                      | Medical treatment status                  | Socioeconomic comparison | Neoplasms                                                                                           | colorectal cancer                                                                                                                    |                                       |                                               |  |
| Higuchi 2015   | [THE INFLUENCE OF HOSPITAL VOLUME ON THE OUTCOME OF COLORECTAL CANCER RESECTIONS IN JAPAN]                                                                                                                          | DPC  |                                                            | Nationwide | 2007    | 2008 | Health policy evaluation and utilization  |                                           | Neoplasms                |                                                                                                     | colorectal cancer resections                                                                                                         |                                       |                                               |  |
| Yasunaga 2011  | Effect of the Japanese herbal kampo medicine dai-kenchu-to on postoperative adhesive small bowel obstruction requiring long-tube decompression: a propensity score analysis                                         | DPC  | DPC Research Group                                         | Nationwide | 2007    | 2008 | Intervention effect                       |                                           | Neoplasms                |                                                                                                     | underwent radical surgery for colorectal cancer                                                                                      |                                       |                                               |  |
| Niikura 2016   | Factors predicting adverse events associated with therapeutic colonoscopy for colorectal neoplasia: a retrospective nationwide study in Japan                                                                       | DPC  |                                                            | Nationwide | 2013    | 2014 | Clinical epidemiology, course of diseases | Intervention effect                       | Neoplasms                |                                                                                                     | colorectal neoplasia                                                                                                                 |                                       |                                               |  |
| Yamazaki 2021  | Real-World Evidence on Second-Line Treatment of Metastatic Colorectal Cancer Using Fluoropyrimidine, Irinotecan, and Angiogenesis Inhibitor                                                                         | MDV  |                                                            | Nationwide | 2008    | 2019 | Intervention effect                       |                                           | Neoplasms                |                                                                                                     | malignant neoplasm of colon (ICD10 code: C18-20)                                                                                     | Others                                | age 20 years or higher and 90 years and below |  |
| Kawamura 2020  | Effect of adjuvant chemotherapy on survival benefit in stage III colon cancer patients stratified by age: a Japanese real-world cohort study                                                                        | DPC  | Osaka Cancer Registry + DPC                                | Prefecture | Osaka   | 2010 | 2014                                      | Intervention effect                       | Medical treatment status | Neoplasms                                                                                           | stage III colon cancer                                                                                                               | Others                                | patients aged 18 years or older               |  |
| Sakamoto 2018  | [The influence of lifestyle-related disease on colon cancer by the decision tree analysis using DPC data]                                                                                                           | DPC  |                                                            | Nationwide | 2010    | 2012 | Clinical epidemiology, course of diseases |                                           | Neoplasms                |                                                                                                     | colon cancer                                                                                                                         | Others                                | age ≥20 years                                 |  |
| Shin 2019      | Effects of preoperative oral management by dentists on postoperative outcomes following esophagectomy: Multilevel propensity score matching and weighting analyses using the Japanese inpatient database            | DPC  |                                                            | Nationwide | 2016    | 2017 | Intervention effect                       | Health economics                          | Neoplasms                |                                                                                                     | esophageal cancer cases (C15.x)                                                                                                      |                                       |                                               |  |
| Tsukada 2018   | The use of neoadjuvant therapy for resectable locally advanced thoracic esophageal squamous cell carcinoma in an analysis of 5016 patients from 305 designated cancer care hospitals in Japan                       | DPC  | Combined with the hospital-based registry data             | Nationwide | 2012    | 2013 | Medical treatment status                  |                                           | Neoplasms                |                                                                                                     | patients diagnosed with resectable locally advanced thoracic esophageal squamous cell carcinoma                                      |                                       |                                               |  |

|                 |                                                                                                                                                                                                                                                 |     |                                           |            |                                                               |      |                                           |                                          |           |                                      |                                                                                       |                             |                                  |  |
|-----------------|-------------------------------------------------------------------------------------------------------------------------------------------------------------------------------------------------------------------------------------------------|-----|-------------------------------------------|------------|---------------------------------------------------------------|------|-------------------------------------------|------------------------------------------|-----------|--------------------------------------|---------------------------------------------------------------------------------------|-----------------------------|----------------------------------|--|
| Takeda 2019     | Prophylactic sivelestat for esophagectomy and in-hospital mortality: a propensity score-matched analysis of claims database                                                                                                                     | MDV |                                           | Nationwide | 2010                                                          | 2016 | Medical treatment status                  | Intervention effect                      | Neoplasms |                                      | esophageal cancer (ICD10 code C15)                                                    | Others                      | aged 20 years or older           |  |
| Hamamoto 2018   | Treatment selection for esophageal cancer: evaluation from a nationwide database                                                                                                                                                                | DPC | DPC + HBCRs                               | Nationwide | 2013                                                          | 2013 | Medical treatment status                  | Health economics                         | Neoplasms |                                      | esophageal cancer                                                                     |                             |                                  |  |
| Kunitomi 2021   | Intergenerational comparison of 5-HT3RA in the prevention of chemotherapy-induced nausea and vomiting in gastric cancer patients receiving cisplatin-based chemotherapy: an observational study using a Japanese administrative claims database | MDV |                                           | Nationwide | 2012                                                          | 2017 | Intervention effect                       |                                          | Neoplasms |                                      | gastric cancer (ICD-10 code C16)                                                      | Others                      | Exclude less than 20 years old   |  |
| Shibao 2020     | Clinical Outcomes of Laparoscopic Versus Laparotomic Distal Gastrectomy in Gastric Cancer Patients: A Multilevel Analysis Based on a Nationwide Administrative Database in Japan                                                                | DPC |                                           | Nationwide | 2012                                                          | 2013 | Intervention effect                       | Health economics                         | Neoplasms |                                      | gastric cancer (ICD10: C16)                                                           |                             |                                  |  |
| Yasunaga 2013   | Outcomes after laparoscopic or open distal gastrectomy for early-stage gastric cancer: a propensity-matched analysis                                                                                                                            | DPC |                                           | Nationwide | 2010                                                          | 2010 | Intervention effect                       |                                          | Neoplasms |                                      | gastric cancer                                                                        |                             |                                  |  |
| Tahara 2020     | Re-challenge of Platinum-based Chemotherapy for Platinum-refractory Patients with Recurrent or Metastatic Head and Neck Cancer: Claims Data Analysis in Japan                                                                                   | MDV |                                           | Nationwide | 2013                                                          | 2016 | Intervention effect                       |                                          | Neoplasms |                                      | head and neck cancer                                                                  | Others                      | age ≥18 years                    |  |
| Suzuki 2016     | Cerebral infarction after intraarterial and intravenous chemoradiotherapy for head and neck cancer: A retrospective analysis using a Japanese inpatient database                                                                                | DPC |                                           | Nationwide | 2010                                                          | 2013 | Intervention effect                       |                                          | Neoplasms |                                      | head and neck cancer receiving platinumbased chemotherapy and concurrent radiotherapy |                             |                                  |  |
| Suzuki 2018     | Postoperative mechanical bowel obstruction after pharyngolaryngectomy for hypopharyngeal cancer: Retrospective analysis using a Japanese inpatient database                                                                                     | DPC |                                           | Nationwide | 2007                                                          | 2014 | Intervention effect                       |                                          | Neoplasms |                                      | patients underwent pharyngolaryngectomy                                               |                             |                                  |  |
| Ichimiya 2011   | Profiling of the care processes for laryngeal cancer with the Japanese administrative database                                                                                                                                                  | DPC |                                           | Nationwide | 2008                                                          | 2008 | Medical treatment status                  |                                          | Neoplasms |                                      | laryngeal cancer                                                                      |                             |                                  |  |
| Tsutsumi 2019   | Impact of oral voriconazole during chemotherapy for acute myeloid leukemia and myelodysplastic syndrome: a Japanese nationwide retrospective cohort study                                                                                       | DPC |                                           | Nationwide | 2010                                                          | 2015 | Intervention effect                       |                                          | Neoplasms |                                      | acute myeloid leukemia and myelodysplastic syndrome                                   | Others                      | age upon admission ≥18 years     |  |
| Maeda 2014      | Regional differences in performance of bone marrow transplantation, care-resource use and outcome for adult T-cell leukaemia in Japan                                                                                                           | DPC |                                           | Nationwide | 2010                                                          | 2010 | Socioeconomic comparison                  | Medical treatment status                 | Neoplasms |                                      | Adult T-cell leukemia                                                                 |                             |                                  |  |
| Okinaga 2018    | Short-Term Outcomes following Hepatectomy in Elderly Patients with Hepatocellular Carcinoma: An Analysis of 10,805 Septuagenarians and 2,381 Octo- and Nonagenarians in Japan                                                                   | DPC |                                           | Nationwide | 2011                                                          | 2012 | Intervention effect                       |                                          | Neoplasms |                                      | hepatocellular carcinoma (ICD-10 code: C220)                                          | Others                      | aged ≥20 years                   |  |
| Soma 2010       | [Treatment of liver cancer and DPC current situation in Japan]                                                                                                                                                                                  | DPC | Global health consulting, Japan           | Nationwide | 2008                                                          | 2008 | Medical treatment status                  | Quality of care                          | Neoplasms |                                      | liver cancer                                                                          |                             |                                  |  |
| Sato 2017       | Association between hospital volume and in-hospital mortality following radiofrequency ablation for hepatocellular carcinoma                                                                                                                    | DPC |                                           | Nationwide | 2010                                                          | 2012 | Health policy evaluation and utilization  |                                          | Neoplasms |                                      | hepatocellular carcinoma (C220)                                                       |                             |                                  |  |
| Sato 2019       | In-hospital mortality associated with transcatheter arterial embolization for treatment of hepatocellular carcinoma in patients on hemodialysis for end stage renal disease: a matched-pair cohort study using a nationwide database            | DPC |                                           | Nationwide | 2010                                                          | 2012 | Intervention effect                       |                                          | Neoplasms |                                      | Hepatocellular carcinoma (ICD-10 code C220)                                           |                             |                                  |  |
| Akada 2019      | Database analysis of patients with hepatocellular carcinoma and treatment flow in early and advanced stages                                                                                                                                     | MDV |                                           | Nationwide | 2008                                                          | 2017 | Medical treatment status                  |                                          | Neoplasms |                                      | hepatocellular carcinoma (C220)                                                       |                             |                                  |  |
| Fukuda 2020     | Differences in healthcare expenditure estimates according to statistical approach: A nationwide claims database study on patients with hepatocellular carcinoma                                                                                 | NDB |                                           | Nationwide | 2010                                                          | 2018 | Research methodology                      | Health economics                         | Neoplasms |                                      | Hepatocellular carcinoma                                                              | Others                      | ≥20 years of age                 |  |
| Sato 2012       | Mortality and morbidity of hepatectomy, radiofrequency ablation, and embolization for hepatocellular carcinoma: a national survey of 54,145 patients                                                                                            | DPC |                                           | Nationwide | 2007                                                          | 2008 | Clinical epidemiology, course of diseases | Intervention effect                      | Neoplasms |                                      | hepatocellular carcinoma (C220)                                                       |                             |                                  |  |
| Yasunaga 2012   | Relationship between hospital volume and operative mortality for liver resection: Data from the Japanese Diagnosis Procedure Combination database                                                                                               | DPC |                                           | Nationwide | 2007                                                          | 2009 | Health policy evaluation and utilization  |                                          | Neoplasms |                                      | liver resection                                                                       |                             |                                  |  |
| Shinkawa 2018   | Mortality and morbidity after hepatic resection in patients undergoing hemodialysis: analysis of a national inpatient database in Japan                                                                                                         | DPC |                                           | Nationwide | 2010                                                          | 2014 | Clinical epidemiology, course of diseases |                                          | Neoplasms | Diseases of the genitourinary system | hepatic resection in patients undergoing hemodialysis                                 | Others                      | patients aged ≥20 years          |  |
| Goto 2020       | Treatment Sequencing in Patients with Anaplastic Lymphoma Kinase-Positive Non-Small Cell Lung Cancer in Japan: A Real-World Observational Study                                                                                                 | MDV |                                           | Nationwide | 2010                                                          | 2017 | Medical treatment status                  | Intervention effect                      | Neoplasms |                                      | malignant neoplasm of bronchus and lung (ICD-10: C34)                                 | Others                      | as least 18 years of age         |  |
| Mori 2020       | The role of heparin bridging in lung cancer surgery: a nationwide database analysis                                                                                                                                                             | DPC |                                           | Nationwide | 2014                                                          | 2018 | Intervention effect                       |                                          | Neoplasms |                                      | lung cancer (ICD-10code: C34)                                                         |                             |                                  |  |
| Fujimoto 2019   | Effect of combination of pre- and postoperative pulmonary rehabilitation on onset of postoperative pneumonia: a retrospective cohort study based on data from the diagnosis procedure combination database in Japan                             | MDV | DPC data collected by Medical Data Vision | Nationwide | 2018                                                          | 2018 | Intervention effect                       |                                          | Neoplasms |                                      | patients admitted who received operative treatment for a new primary (ICD codes: C34) |                             |                                  |  |
| Urushiyama 2018 | Oral fluorouracil vs vinorelbine plus cisplatin as adjuvant chemotherapy for stage II-IIIa non-small cell lung cancer: Propensity score-matched and instrumental variable analyses                                                              | DPC |                                           | Nationwide | 2010                                                          | 2015 | Intervention effect                       |                                          | Neoplasms |                                      | patients with non-small cell lung cancer (ICD-10codes: C340, C341, C342, C343, C348)  | Others                      | excluded patients aged ≤17 years |  |
| Urushiyama 2017 | Adjuvant chemotherapy versus chemoradiotherapy for small cell lung cancer with lymph node metastasis: a retrospective observational study with use of a national database in Japan                                                              | DPC |                                           | Nationwide | 2010                                                          | 2015 | Intervention effect                       |                                          | Neoplasms |                                      | small cell lung cancer                                                                | Others                      | excluded patients aged ≤17 years |  |
| Wang 2017       | Systemic Treatment Patterns With Advanced or Recurrent Non-small Cell Lung Cancer in Japan: A Retrospective Hospital Administrative Database Study                                                                                              | MDV |                                           | Nationwide | 2008                                                          | 2015 | Medical treatment status                  |                                          | Neoplasms |                                      | Non-small Cell Lung Cance                                                             | Others                      | age ≥18 years                    |  |
| Sato 2017       | [Association between perioperative pulmonary rehabilitation and postoperative pneumonia in lung cancer resection patients : An analysis using Japanese administrative database]                                                                 | DPC | QIP                                       | Nationwide | 2012                                                          | 2015 | Intervention effect                       |                                          | Neoplasms |                                      | lung cancer resection patients                                                        | Others                      | excluded patients aged <18 years |  |
| Kunisawa 2014   | Survival analyses of postoperative lung cancer patients: an investigation using Japanese administrative data                                                                                                                                    | DPC | QIP                                       | Nationwide | 2008                                                          | 2013 | Clinical epidemiology, course of diseases |                                          | Neoplasms |                                      | Non-small cell lung cancer patients (C34 )                                            |                             |                                  |  |
| Kondo 2012      | Evaluation of the introduction of a diagnosis procedure combination system for patient outcome and hospitalisation charges for patients with hip fracture or lung cancer in Japan                                                               | DPC | JRCMC                                     | Nationwide | 92 Japanese Red Cross Medical Centres and community hospitals | 2005 | 2008                                      | Health policy evaluation and utilization |           | Neoplasms                            | Injury, poisoning and certain other consequences of external causes                   | hip fracture or lung cancer |                                  |  |
| Otake 2011      | Impact of hospital volume on chest tube duration, length of stay, and mortality after lobectomy                                                                                                                                                 | DPC |                                           | Nationwide | 2007                                                          | 2008 | Health policy evaluation and utilization  |                                          | Neoplasms |                                      | lung cancer                                                                           |                             |                                  |  |

|               |                                                                                                                                                                                                                                  |        |                                                                                                                                  |            |                         |      |                                           |                                           |           |                                                                                                                     |                                   |                              |
|---------------|----------------------------------------------------------------------------------------------------------------------------------------------------------------------------------------------------------------------------------|--------|----------------------------------------------------------------------------------------------------------------------------------|------------|-------------------------|------|-------------------------------------------|-------------------------------------------|-----------|---------------------------------------------------------------------------------------------------------------------|-----------------------------------|------------------------------|
| Uda 2018      | Preoperative short-term plus postoperative physical therapy versus postoperative physical therapy alone for patients undergoing lung cancer surgery: retrospective analysis of a nationwide inpatient database                   | DPC    |                                                                                                                                  | Nationwide | 2010                    | 2015 | Intervention effect                       |                                           | Neoplasms | lung cancer                                                                                                         | Others                            | aged 18 years or older       |
| Tsutsue 2021  | Comparative effectiveness study of chemotherapy in follicular lymphoma patients in the rituximab era: a Japanese claims database study                                                                                           | MDV    |                                                                                                                                  | Nationwide | 2008                    | 2017 | Health economics                          | Medical treatment status                  | Neoplasms | ICD-10 diagnosis code for Follicular lymphoma (C82.x)                                                               |                                   |                              |
| Ohno 2020     | Cost-effectiveness analysis of treatment regimens with obinutuzumab plus chemotherapy in Japan for untreated follicular lymphoma patients                                                                                        | Others | MDV, JMDC; localizing the model in US (Guzauskas et al. 2019)                                                                    | Nationwide | 2012                    | 2018 | Health economics                          |                                           | Neoplasms | follicular lymphoma                                                                                                 | Others                            | at least 18-years-old of age |
| Tsutsue 2020  | Nationwide claims database analysis of treatment patterns, costs and survival of Japanese patients with diffuse large B-cell lymphoma                                                                                            | MDV    |                                                                                                                                  | Nationwide | 2008                    | 2017 | Medical treatment status                  | Health economics                          | Neoplasms | diffuse large B-cell lymphoma                                                                                       |                                   |                              |
| Ikawa 2021    | In-Hospital Complications After Surgery in Elderly Patients with Asymptomatic or Minor Symptom Meningioma: A Nationwide Registry Study                                                                                           | DPC    |                                                                                                                                  | Nationwide | 2010                    | 2015 | Clinical epidemiology, course of diseases | Intervention effect                       | Neoplasms | Asymptomatic or Minor Symptom Meningioma (ICD-10 code: D32)                                                         | Others                            | aged 18-90 years             |
| Kikuchi 2019  | [The Usage of Acetylsalicylic Acid for Lenalidomide Medication in Patients with Multiple Myeloma –Survey on Actual Condition of Clinical Data Using MDVAnalyzer–]                                                                | MDV    |                                                                                                                                  | Nationwide | 2016                    | 2017 | Medical treatment status                  |                                           | Neoplasms | multiple myeloma (ICD-10: C900)                                                                                     | Others                            | aged 20 years or older       |
| Uno 2020      | Current treatment patterns and medical costs for multiple myeloma in Japan: a cross-sectional analysis of a health insurance claims database                                                                                     | MDV    |                                                                                                                                  | Nationwide | 2008                    | 2016 | Medical treatment status                  | Health economics                          | Neoplasms | multiple myeloma (C90.0)                                                                                            |                                   |                              |
| Iida 2021     | Medical database analysis of Japanese multiple myeloma patients with planned stem cell transplantation (MEDALIST) - a focus on healthcare resource utilization and cost                                                          | MDV    |                                                                                                                                  | Nationwide | 2013                    | 2016 | Health economics                          |                                           | Neoplasms | multiple myeloma                                                                                                    |                                   |                              |
| Guan 2020     | Treatment Patterns in Newly Diagnosed Multiple Myeloma Patients in Japan Using A Large-scale Claims Database: Retrospective Cohort Study                                                                                         | MDV    |                                                                                                                                  | Nationwide | 2008                    | 2015 | Medical treatment status                  |                                           | Neoplasms | Multiple Myeloma (ICD-10 code: C900)                                                                                | Others                            | aged 18 years or older       |
| Ogura 2014    | Nomogram predicting severe adverse events after musculoskeletal tumor surgery: analysis of a national administrative database                                                                                                    | DPC    |                                                                                                                                  | Nationwide | 2007                    | 2012 | Prediction model                          | Intervention effect                       | Neoplasms | musculoskeletal tumor                                                                                               |                                   |                              |
| Ogura 2013    | Incidence and risk factors for pulmonary embolism after primary musculoskeletal tumor surgery                                                                                                                                    | DPC    |                                                                                                                                  | Nationwide | 2007                    | 2010 | Intervention effect                       |                                           | Neoplasms | who underwent musculoskeletal tumor surgery (C40-41, C47-49)                                                        |                                   |                              |
| Ogura 2013    | Impact of hospital volume on postoperative complications and in-hospital mortality after musculoskeletal tumor surgery: analysis of a national administrative database                                                           | DPC    |                                                                                                                                  | Nationwide | 2007                    | 2010 | Health policy evaluation and utilization  |                                           | Neoplasms | who underwent musculoskeletal tumor surgery (C40-41, C47-49, C795)                                                  |                                   |                              |
| Suzuki 2021   | Treatment patterns in pancreatic cancer patients based on a hospital claims database in Japan                                                                                                                                    | MDV    |                                                                                                                                  | Nationwide | 2010                    | 2018 | Medical treatment status                  |                                           | Neoplasms | Pancreatic cancer (ICD-10: C250-253 and C257-259)                                                                   |                                   |                              |
| Umegaki 2018  | The impact of low body mass index on postoperative outcomes in pancreatotomy patients: a retrospective analysis of Japanese administrative data                                                                                  | DPC    | QIP                                                                                                                              | Nationwide | 2010                    | 2016 | Clinical epidemiology, course of diseases |                                           | Neoplasms | pancreatic cancer                                                                                                   | Others                            | excluded aged below 20 years |
| Tarasawa 2018 | [Comparative validation of hospital death by cancer from the viewpoint of presence or absence of home medical care before hospitalization : Treatment contents and period to death in pancreatic cancer cases based on DPC data] | DPC    |                                                                                                                                  | Nationwide | 2014                    | 2016 | Medical treatment status                  | Patient health service utilization        | Neoplasms | pancreatic cancer (ICD10: C25)                                                                                      | Older persons                     | age ≥65 years                |
| Tsuda 2016    | Complications and Postoperative Mortality Rate After Surgery for Pathological Femur Fracture Related to Bone Metastasis: Analysis of a Nationwide Database                                                                       | DPC    |                                                                                                                                  | Nationwide | 2007                    | 2012 | Intervention effect                       |                                           | Neoplasms | Diseases of the musculoskeletal system and connective tissue pathological femur fracture (ICD-10 code: M84.5, C795) |                                   |                              |
| Tsuda 2015    | [Predictors of early mortality in femur metastasis patients with pathological fracture : Analysis of DPC database]                                                                                                               | DPC    |                                                                                                                                  | Nationwide | 2007                    | 2012 | Clinical epidemiology, course of diseases |                                           | Neoplasms | Diseases of the musculoskeletal system and connective tissue code: M84.5, C795)                                     |                                   |                              |
| Sawada 2020   | Predictive factors of the 30-day mortality after surgery for spinal metastasis: Analysis of a nationwide database                                                                                                                | DPC    |                                                                                                                                  | Nationwide | 2010                    | 2016 | Prediction model                          | Clinical epidemiology, course of diseases | Neoplasms | Diseases of the musculoskeletal system and connective tissue pathological spine fracture, bone metastasis           |                                   |                              |
| Matsuda 2016  | The Diagnosis Procedure Combination based situation analysis of surgical intervention for pituitary tumor in Japan                                                                                                               | DPC    |                                                                                                                                  | Nationwide | 2011                    | 2012 | Health policy evaluation and utilization  |                                           | Neoplasms | discharge cases of pituitary tumor                                                                                  |                                   |                              |
| Komatsu 2020  | Real-world, retrospective study evaluating thromboembolic events, associated risk factors, and health-care resource utilization in Japanese patients with polycythemia vera                                                      | MDV    |                                                                                                                                  | Nationwide | 2008                    | 2015 | Clinical epidemiology, course of diseases | Health economics                          | Neoplasms | Polycythemia vera                                                                                                   | Others                            | aged ≥20 years               |
| Isogai 2017   | Factors affecting in-hospital mortality and likelihood of undergoing surgical resection in patients with primary cardiac tumors                                                                                                  | DPC    |                                                                                                                                  | Nationwide | 2010                    | 2013 | Clinical epidemiology, course of diseases |                                           | Neoplasms | primary cardiac tumors                                                                                              |                                   |                              |
| Mori 2019     | The correlation between metastasis-free survival and overall survival in non-metastatic castration resistant prostate cancer patients from the Medical Data Vision claims database in Japan                                      | MDV    |                                                                                                                                  | Nationwide | 2003                    | 2018 | Clinical epidemiology, course of diseases |                                           | Neoplasms | prostate cancer                                                                                                     |                                   |                              |
| Satoh 2018    | The Economic Burden of Metastatic Castration Resistant Prostate Cancer and Skeletal Related Events in Japanese University Hospitals                                                                                              | Others | Clinical Information Statistical Analysis (CISA) database: contains the electronic records of approximately 2.5 million patients | Others     | 13 university hospitals | 2005 | 2016                                      | Health economics                          | Neoplasms | metastatic castration resistant prostate cancer                                                                     |                                   |                              |
| Goto 2017     | Cost analysis of leuprolerin acetate in Japanese prostate cancer patients: comparison between 6-month and 3-month depot formulations                                                                                             | MDV    | web-based survey to determine the intangible costs                                                                               | Nationwide | 2008                    | 2016 | Health economics                          |                                           | Neoplasms | prostate cancer (ICD-10 code: C61)                                                                                  |                                   |                              |
| Sugihara 2017 | Accessibility to surgical robot technology and prostate-cancer patient behavior for prostatectomy                                                                                                                                | DPC    |                                                                                                                                  | Nationwide | 2012                    | 2014 | Patient health service utilization        |                                           | Neoplasms | malignant neoplasm of the prostate (code C61)                                                                       |                                   |                              |
| Kunisawa 2015 | Realities in cost-effectiveness analyses: a study of castration-resistant prostate cancer patients using a medical claims database                                                                                               | JMDC   |                                                                                                                                  | Nationwide | 2005                    | 2013 | Medical treatment status                  | Health economics                          | Neoplasms | castration-resistant prostate cancer patients                                                                       | Others                            | below 75 years old           |
| Sugihara 2014 | Robot-assisted versus other types of radical prostatectomy: population-based safety and cost comparison in Japan, 2012-2013                                                                                                      | DPC    |                                                                                                                                  | Nationwide | 2012                    | 2013 | Intervention effect                       | Health economics                          | Neoplasms | the main diagnosis of malignant neoplasm of the prostate (ICD-10 code C61)                                          |                                   |                              |
| Sugihara 2013 | Is mechanical bowel preparation in laparoscopic radical prostatectomy beneficial? An analysis of a Japanese national database                                                                                                    | DPC    |                                                                                                                                  | Nationwide | 2008                    | 2010 | Intervention effect                       |                                           | Neoplasms | prostate cancer                                                                                                     |                                   |                              |
| Sugihara 2013 | Comparisons of perioperative outcomes and costs between open and laparoscopic radical prostatectomy: a propensity-score matching analysis based on the Japanese Diagnosis Procedure Combination database                         | DPC    |                                                                                                                                  | Nationwide | 2007                    | 2010 | Intervention effect                       | Health economics                          | Neoplasms | prostatectomy, prostate cancer                                                                                      |                                   |                              |
| Sugihara 2013 | Wide range and variation in minimally invasive surgery for renal malignancy in Japan: a population-based analysis                                                                                                                | DPC    | DPC Study Group                                                                                                                  | Nationwide | 2007                    | 2010 | Medical treatment status                  | Socioeconomic comparison                  | Neoplasms | renal malignancy (C64)                                                                                              |                                   |                              |
| Takagi 2014   | Cytoreductive nephrectomy for metastatic renal cell carcinoma: a population-based analysis of perioperative outcomes according to clinical stage                                                                                 | DPC    |                                                                                                                                  | Nationwide | 2007                    | 2012 | Intervention effect                       |                                           | Neoplasms | metastatic renal cell carcinoma (C64)                                                                               |                                   |                              |
| Suzuki 2016   | Factors Associated With Neck Hematoma After Thyroidectomy: A Retrospective Analysis Using a Japanese Inpatient Database                                                                                                          | DPC    |                                                                                                                                  | Nationwide | 2010                    | 2014 | Intervention effect                       |                                           | Neoplasms | Others                                                                                                              | patients undergoing thyroidectomy |                              |

|                                                                                                                         |                                                                                                                                                                                      |     |                                     |            |                 |      |      |                                           |                          |                                                                                                     |                                                                     |                                                                                                  |          |                                                         |
|-------------------------------------------------------------------------------------------------------------------------|--------------------------------------------------------------------------------------------------------------------------------------------------------------------------------------|-----|-------------------------------------|------------|-----------------|------|------|-------------------------------------------|--------------------------|-----------------------------------------------------------------------------------------------------|---------------------------------------------------------------------|--------------------------------------------------------------------------------------------------|----------|---------------------------------------------------------|
| Sughara 2014                                                                                                            | Performance comparisons in major uro-oncological surgeries between the USA and Japan                                                                                                 | DPC |                                     | Nationwide | USA and Japan   | 2009 | 2011 | Medical treatment status                  | Socioeconomic comparison | Neoplasms                                                                                           |                                                                     | uro-oncological surgeries                                                                        |          |                                                         |
| Yasunaga 2010                                                                                                           | Impact of hospital volume on postoperative complications and in-hospital mortality after renal surgery: data from the Japanese Diagnosis Procedure Combination Database              | DPC |                                     | Nationwide |                 | 2006 | 2007 | Health policy evaluation and utilization  |                          | Neoplasms                                                                                           |                                                                     | nephrectomy or nephroureterectomy                                                                |          |                                                         |
| Kanemura 2020                                                                                                           | Thymic epithelial tumor treatment in Japan: analysis of hospital cancer registry and insurance claims data, 2012-2014                                                                | DPC | HBCR+DPC                            | Nationwide |                 | 2012 | 2014 | Medical treatment status                  |                          | Neoplasms                                                                                           |                                                                     | Thymic epithelial tumors                                                                         |          |                                                         |
| Konishi 2020                                                                                                            | Comparison of outcomes after differentiated thyroid cancer surgery performed with and without energy devices: A population-based cohort study using a nationwide database in Japan   | DPC |                                     | Nationwide |                 | 2010 | 2017 | Intervention effect                       |                          | Neoplasms                                                                                           |                                                                     | patients with thyroid cancer who underwent thyroidectomy                                         |          |                                                         |
| Mizuno 2019                                                                                                             | Recurrent laryngeal nerve paralysis after thyroid cancer surgery and intraoperative nerve monitoring                                                                                 | MDV |                                     | Nationwide |                 | 2014 | 2017 | Intervention effect                       |                          | Neoplasms                                                                                           |                                                                     | patients who underwent thyroid cancer surgery                                                    | Others   | age ≥20 years                                           |
| Mizuno 2020                                                                                                             | Outcomes in patients diagnosed with tongue cancer before and after the age of 45 years                                                                                               | MDV |                                     | Nationwide |                 | 2008 | 2019 | Clinical epidemiology, course of diseases |                          | Neoplasms                                                                                           |                                                                     | tongue cancer (ICD10code: C020, C021, C022 or C029)                                              | Others   | patients aged ≥20 years                                 |
| Sughara 2014                                                                                                            | Factors affecting choice between ureterostomy, ileal conduit and continent reservoir after radical cystectomy: Japanese series                                                       | DPC |                                     | Nationwide |                 | 2007 | 2012 | Medical treatment status                  |                          | Neoplasms                                                                                           |                                                                     | patients who underwent radical cystectomy for urothelial carcinoma                               |          |                                                         |
| Akada 2021                                                                                                              | Real-world database analysis of the characteristics and treatment patterns of patients with endometrial cancer in Japan                                                              | MDV |                                     | Nationwide |                 | 2008 | 2019 | Clinical epidemiology, course of diseases | Medical treatment status | Neoplasms                                                                                           |                                                                     | endometrial and uterine cancers (C541, C549)                                                     |          |                                                         |
| Muramatsu 2013                                                                                                          | Description of Treatment of Uterus Cancer Based on the Japanese DPC Database                                                                                                         | DPC |                                     | Nationwide |                 | 2010 | 2010 | Medical treatment status                  |                          | Neoplasms                                                                                           |                                                                     | uterus cancer                                                                                    |          |                                                         |
| <b>3) Diseases of the blood and blood-forming organs and certain disorders involving the immune mechanism (D50-D89)</b> |                                                                                                                                                                                      |     |                                     |            |                 |      |      |                                           |                          |                                                                                                     |                                                                     |                                                                                                  |          |                                                         |
| Kamesaki 2020                                                                                                           | Demographic characteristics, thromboembolism risk, and treatment patterns for patients with cold agglutinin disease in Japan                                                         | MDV |                                     | Nationwide |                 | 2008 | 2017 | Clinical epidemiology, course of diseases | Medical treatment status | Diseases of the blood and blood-forming organs and certain disorders involving the immune mechanism |                                                                     | Cold agglutinin disease                                                                          | Others   | aged ≥18 years                                          |
| Ohbe 2020                                                                                                               | Underlying Disorders, Clinical Phenotypes, and Treatment Diversity among Patients with Disseminated Intravascular Coagulation                                                        | DPC |                                     | Nationwide |                 | 2010 | 2018 | Clinical epidemiology, course of diseases |                          | Diseases of the blood and blood-forming organs and certain disorders involving the immune mechanism | Pregnancy, childbirth and the puerperium                            | disseminated intravascular coagulation (ICD10codes: D64, O450, O460, O723, O081)                 | Others   | excluded patients who were younger than 18 years of age |
| Taniguchi 2020                                                                                                          | Antithrombin use and mortality in patients with stage IV solid tumor-associated disseminated intravascular coagulation: a nationwide observational study in Japan                    | DPC |                                     | Nationwide |                 | 2010 | 2018 | Intervention effect                       |                          | Diseases of the blood and blood-forming organs and certain disorders involving the immune mechanism | Neoplasms                                                           | disseminated intravascular coagulation (admitted with the stage IV solid tumors)                 |          |                                                         |
| Yamakawa 2020                                                                                                           | Time Trends of the Outcomes and Treatment Options for Disseminated Intravascular Coagulation: A Nationwide Observational Study in Japan                                              | DPC |                                     | Nationwide |                 | 2010 | 2018 | Clinical epidemiology, course of diseases |                          | Diseases of the blood and blood-forming organs and certain disorders involving the immune mechanism | Pregnancy, childbirth and the puerperium                            | patients with disseminated intravascular coagulation (ICD-10 codes: D65, O450, O460, O723, O081) | Others   | excluded patients who were younger than 18 years of age |
| Ichikawa 2019                                                                                                           | [Recombinant human soluble thrombomodulin in neonatal DIC in Japan: analysis using a diagnosis procedure combination database]                                                       | DPC | DPCR1                               | Nationwide |                 | 2014 | 2016 | Medical treatment status                  |                          | Diseases of the blood and blood-forming organs and certain disorders involving the immune mechanism | Certain conditions originating in the perinatal period              | Disseminated intravascular coagulation syndrome (D65, P60)                                       | Children | 0 years old                                             |
| Murata 2017                                                                                                             | Effects of longer use of recombinant human soluble thrombomodulin on outcomes of patients with disseminated intravascular coagulation based on a national administrative database    | DPC |                                     | Nationwide |                 | 2010 | 2012 | Intervention effect                       |                          | Diseases of the blood and blood-forming organs and certain disorders involving the immune mechanism |                                                                     | disseminated intravascular coagulation                                                           |          |                                                         |
| Araki 2019                                                                                                              | Incidence and In-Hospital Mortality of Neonatal Disseminated Intravascular Coagulation in Japan: An Observational Study of a Nationwide Hospital Claims Database                     | DPC |                                     | Nationwide |                 | 2014 | 2016 | Clinical epidemiology, course of diseases |                          | Diseases of the blood and blood-forming organs and certain disorders involving the immune mechanism | Certain conditions originating in the perinatal period              | Neonatal Disseminated Intravascular Coagulation                                                  | Children | neonates                                                |
| Ohbe 2019                                                                                                               | Treatment with Antithrombin or Thrombomodulin and Mortality from Heatstroke-Induced Disseminated Intravascular Coagulation: A Nationwide Observational Study                         | DPC |                                     | Nationwide |                 | 2010 | 2017 | Intervention effect                       |                          | Diseases of the blood and blood-forming organs and certain disorders involving the immune mechanism | Injury, poisoning and certain other consequences of external causes | heatstroke-induced disseminated intravascular coagulation                                        | Others   | aged ≥19 years                                          |
| Tagami 2015                                                                                                             | Use of recombinant human soluble thrombomodulin in patients with sepsis-induced disseminated intravascular coagulation after intestinal perforation                                  | DPC |                                     | Nationwide |                 | 2010 | 2013 | Intervention effect                       |                          | Diseases of the blood and blood-forming organs and certain disorders involving the immune mechanism | Diseases of the digestive system                                    | sepsis-induced disseminated intravascular coagulation after intestinal perforation               | Others   | ≥15 years of age                                        |
| Tagami 2015                                                                                                             | Supplemental dose of antithrombin use in disseminated intravascular coagulation patients after abdominal sepsis                                                                      | DPC |                                     | Nationwide |                 | 2010 | 2013 | Intervention effect                       |                          | Diseases of the blood and blood-forming organs and certain disorders involving the immune mechanism | Diseases of the digestive system                                    | disseminated intravascular coagulation patients after abdominal sepsis                           | Others   | age ≥15 years                                           |
| Tagami 2015                                                                                                             | Recombinant human soluble thrombomodulin and mortality in severe pneumonia patients with sepsis-associated disseminated intravascular coagulation: an observational nationwide study | DPC |                                     | Nationwide |                 | 2010 | 2013 | Intervention effect                       |                          | Diseases of the blood and blood-forming organs and certain disorders involving the immune mechanism | Diseases of the respiratory system                                  | pneumonia and sepsis-associated Disseminated intravascular coagulation                           | Others   | aged ≥18 years                                          |
| Tagami 2014                                                                                                             | Antithrombin and mortality in severe pneumonia patients with sepsis-associated disseminated intravascular coagulation: an observational nationwide study                             | DPC |                                     | Nationwide |                 | 2010 | 2013 | Intervention effect                       |                          | Diseases of the blood and blood-forming organs and certain disorders involving the immune mechanism | Diseases of the respiratory system                                  | patients with severe pneumonia with sepsis-induced Disseminated intravascular coagulation        | Others   | aged ≥18 years                                          |
| Yamana 2016                                                                                                             | Comparison of Procedure-Based and Diagnosis-Based Identifications of Severe Sepsis and Disseminated Intravascular Coagulation in Administrative Data                                 | DPC | NHO, laboratory data as a reference | Others     | three hospitals | 2013 | 2014 | Research methodology                      |                          | Diseases of the blood and blood-forming organs and certain disorders involving the immune mechanism | Certain infectious and parasitic diseases                           | severe sepsis and disseminated intravascular coagulation                                         | Others   | aged ≥18 years                                          |
| Okubo 2018                                                                                                              | Recent trends in practice patterns and comparisons between immunoglobulin and corticosteroid in pediatric immune thrombocytopenia                                                    | DPC |                                     | Nationwide |                 | 2010 | 2015 | Medical treatment status                  | Health economics         | Diseases of the blood and blood-forming organs and certain disorders involving the immune mechanism |                                                                     | acute pediatric immune thrombocytopenia (ICD-10 code, D69.3)                                     | Children | aged between 3 months and 18 years                      |



|                                                                   |                                                                                                                                                                                                                                                          |           |                                                                             |              |                                        |      |      |                                           |                          |                                                                                                     |                                                 |               |                                      |
|-------------------------------------------------------------------|----------------------------------------------------------------------------------------------------------------------------------------------------------------------------------------------------------------------------------------------------------|-----------|-----------------------------------------------------------------------------|--------------|----------------------------------------|------|------|-------------------------------------------|--------------------------|-----------------------------------------------------------------------------------------------------|-------------------------------------------------|---------------|--------------------------------------|
| Wong 2021                                                         | Management of primary immune thrombocytopenia in a real-world setting in Japan: eltrombopag versus corticosteroids                                                                                                                                       | MDV       |                                                                             | Nationwide   |                                        | 2010 | 2018 | Intervention effect                       |                          | Diseases of the blood and blood-forming organs and certain disorders involving the immune mechanism | immune thrombocytopenia                         | Others        | aged ≥20 years                       |
| <b>4) Endocrine, nutritional and metabolic diseases (E00-E90)</b> |                                                                                                                                                                                                                                                          |           |                                                                             |              |                                        |      |      |                                           |                          |                                                                                                     |                                                 |               |                                      |
| Matsubayashi 2020                                                 | Prevalence, incidence, comorbidities, and treatment patterns among Japanese patients with acromegaly: a descriptive study using a nationwide claims database                                                                                             | NDB       |                                                                             | Nationwide   |                                        | 2012 | 2018 | Clinical epidemiology, course of diseases | Medical treatment status | Endocrine, nutritional and metabolic diseases                                                       | acromegaly                                      | Others        | ≥20 years of age                     |
| Iwasaku 2019                                                      | Impact of underlying chronic adrenal insufficiency on clinical course of hospitalized patients with adrenal crisis: A nationwide cohort study                                                                                                            | Others    | data from a claims database                                                 | Nationwide   | 145 acute phase hospitals across Japan | 2003 | 2014 | Clinical epidemiology, course of diseases |                          | Endocrine, nutritional and metabolic diseases                                                       | Chronic adrenal insufficiency, adrenal crisis   | Others        | age ≥18 years                        |
| Iwasaku 2017                                                      | Clinical characteristics of adrenal crisis in adult population with and without predisposing chronic adrenal insufficiency: a retrospective cohort study                                                                                                 | MDV       |                                                                             | Nationwide   |                                        | 2003 | 2014 | Clinical epidemiology, course of diseases |                          | Endocrine, nutritional and metabolic diseases                                                       | Adrenal crisis                                  | Others        | age ≥18 years                        |
| Nakamura 2015                                                     | [Geographical distribution of primary care clinics for elderly ambulatory diabetic patients in Ibaraki Prefecture]                                                                                                                                       | NHI/LSEHS | insurance claims database (latter-stage elderly healthcare system data)     | Prefecture   | Ibaraki                                | 2010 | 2010 | Health policy evaluation and utilization  |                          | Endocrine, nutritional and metabolic diseases                                                       | diabetes                                        | Older persons | aged 75 years and older              |
| Horii 2021                                                        | On-label use of sodium-glucose cotransporter 2 inhibitors might increase the risk of diabetic ketoacidosis in patients with type 1 diabetes                                                                                                              | MDV       |                                                                             | Nationwide   |                                        | 2018 | 2019 | Intervention effect                       |                          | Endocrine, nutritional and metabolic diseases                                                       | type 1 diabetes                                 |               |                                      |
| Ikesu 2021                                                        | Trends in Diabetes Care during the COVID-19 Outbreak in Japan: an Observational Study                                                                                                                                                                    | MDV       |                                                                             | Nationwide   |                                        | 2019 | 2020 | Medical treatment status                  | COVID-19                 | Endocrine, nutritional and metabolic diseases                                                       | diabetes                                        |               |                                      |
| Kaneko 2021                                                       | Rates and risk factors for amputation in people with diabetes in Japan: a historical cohort study using a nationwide claims database                                                                                                                     | JMDC      |                                                                             | Nationwide   |                                        | 2008 | 2016 | Clinical epidemiology, course of diseases |                          | Endocrine, nutritional and metabolic diseases                                                       | diabetes, amputation                            | Others        | aged 18-72 years                     |
| Kaneko 2021                                                       | A Japanese Study Assessing Glycemic Control with Use of iDegAsp Co-formulation in Patients with Type 2 Diabetes in Clinical Practice: The JAGUAR Study                                                                                                   | MDV       |                                                                             | Nationwide   |                                        | 2018 | 2018 | Intervention effect                       |                          | Endocrine, nutritional and metabolic diseases                                                       | type 2 diabetes                                 | Others        | ≥18 years of age                     |
| Kohsaka 2021                                                      | Healthcare resource utilization after initiation of sodium-glucose co-transporter-2 inhibitors versus dipeptidyl peptidase-4 inhibitors or other glucose-lowering drugs in Japanese patients with type 2 diabetes                                        | MDV       |                                                                             | Nationwide   |                                        | 2014 | 2018 | Health economics                          |                          | Endocrine, nutritional and metabolic diseases                                                       | type 2 diabetes                                 | Others        | aged 18 years or older               |
| Komuro 2021                                                       | Lower heart failure and chronic kidney disease risks associated with sodium-glucose cotransporter-2 inhibitor use in Japanese type 2 diabetes patients without established cardiovascular and renal diseases                                             | MDV       |                                                                             | Nationwide   |                                        | 2014 | 2018 | Intervention effect                       |                          | Endocrine, nutritional and metabolic diseases                                                       | diabetes, heart failure, chronic kidney disease | Others        | aged ≥18 years                       |
| Iketani 2021                                                      | [Identification of Patients with Type 2 Diabetes Mellitus Requiring Concentrated Pharmaceutical Management in Health Insurance] Pharmacies:Quantitative Evaluation Using Administrative Claims Data                                                      | JMDC      |                                                                             | Nationwide   |                                        | 2018 | 2019 | Medical treatment status                  |                          | Endocrine, nutritional and metabolic diseases                                                       | Type 2 Diabetes                                 | Others        | ≥18 years of age                     |
| Harada 2020                                                       | Association of treatment-achieved HbA1c with incidence of coronary artery disease and severe eye disease in diabetes patients                                                                                                                            | JMDC      |                                                                             | Nationwide   |                                        | 2008 | 2016 | Clinical epidemiology, course of diseases | Intervention effect      | Endocrine, nutritional and metabolic diseases                                                       | coronary artery disease and severe eye disease  | Others        | 18-72 years old in diabetes patients |
| Ihana-Sugiyama 2020                                               | Comparison of effectiveness and drug cost between dipeptidyl peptidase-4 inhibitor and biguanide as the first-line anti-hyperglycaemic medication among Japanese working generation with type 2 diabetes                                                 | JMDC      |                                                                             | Nationwide   |                                        | 2010 | 2016 | Intervention effect                       | Health economics         | Endocrine, nutritional and metabolic diseases                                                       | type 2 diabetes                                 | Others        | 20-69 years old                      |
| Jiang 2020                                                        | Health Inequalities Among Elderly Type 2 Diabetes Mellitus Patients in Japan                                                                                                                                                                             | NHI/LSEHS | Fukuoka Prefecture Wide-Area Association of Latter-Stage Elderly Healthcare | Prefecture   | Fukuoka                                | 2013 | 2016 | Patient health service utilization        | Socioeconomic comparison | Endocrine, nutritional and metabolic diseases                                                       | type 2 diabetes                                 | Older persons | ≥75 years of age                     |
| Kameda 2020                                                       | Use of oral antidiabetic drugs in Japanese working-age patients with type 2 diabetes mellitus: dosing pattern for metformin initiators                                                                                                                   | JMDC      |                                                                             | Nationwide   |                                        | 2014 | 2017 | Medical treatment status                  |                          | Endocrine, nutritional and metabolic diseases                                                       | type 2 diabetes                                 | Others        | ≥30 years of age                     |
| Kawaguchi 2020                                                    | Does disease management for diabetic nephropathy reduce medical expenditure? Evidence from a three-period difference-in-differences analysis                                                                                                             | NHI/LSEHS | NHI                                                                         | Municipality | Kure city                              | 2010 | 2013 | Health economics                          |                          | Endocrine, nutritional and metabolic diseases                                                       | diabetic nephropathy                            |               |                                      |
| Kume 2020                                                         | Recent Epidemiological Status of Ocular and Other Major Complications Related to Diabetes Mellitus in Japan                                                                                                                                              | JMDC      |                                                                             | Nationwide   |                                        | 2005 | 2014 | Clinical epidemiology, course of diseases |                          | Endocrine, nutritional and metabolic diseases                                                       | diabetes                                        |               |                                      |
| Kume 2020                                                         | Systemic and ocular diseases associated with the development of diabetic macular edema among Japanese patients with diabetes mellitus                                                                                                                    | JMDC      |                                                                             | Nationwide   |                                        | 2005 | 2014 | Clinical epidemiology, course of diseases |                          | Endocrine, nutritional and metabolic diseases                                                       | diabetic macular edema                          |               |                                      |
| Suzuki 2020                                                       | [Medical cost analysis for diabetes and complications in municipalities in Miyagi Prefecture]*                                                                                                                                                           | NHI/LSEHS | NHI                                                                         | Municipality | Tomiya city, Miyagi                    | 2016 | 2016 | Clinical epidemiology, course of diseases | Health economics         | Endocrine, nutritional and metabolic diseases                                                       | diabetes                                        |               |                                      |
| Horii 2019                                                        | Determination of factors affecting medication adherence in type 2 diabetes mellitus patients using a nationwide claim-based database in Japan                                                                                                            | JMDC      |                                                                             | Nationwide   |                                        | 2005 | 2013 | Patient health service utilization        |                          | Endocrine, nutritional and metabolic diseases                                                       | type 2 diabetes                                 | Others        | 18-74 years old                      |
| Ito 2019                                                          | Characteristics of Patients with Diabetes Initiating Sodium Glucose Co-transporter-2 Inhibitors (SGLT2): Real-World Results from Three Administrative Databases in Japan                                                                                 | Others    | MDV, JMDC, Kyowa Kikaku Ltd. Medi-Trend                                     | Nationwide   |                                        | 2014 | 2017 | Medical treatment status                  |                          | Endocrine, nutritional and metabolic diseases                                                       | diabetes initiating SGLT2 inhibitors            | Others        | ≥18 years of age                     |
| Ito 2019                                                          | Drug Utilization Patterns in Patients with Diabetes Initiating Sodium Glucose Co-Transporter-2 Inhibitors (SGLT2) in Japan: A Multi-Database Study (2014-2017)                                                                                           | Others    | MDV, JMDC, Kyowa Kikaku Ltd. Medi-Trend                                     | Nationwide   |                                        | 2014 | 2017 | Medical treatment status                  |                          | Endocrine, nutritional and metabolic diseases                                                       | diabetes                                        | Others        | ≥18 years of age                     |
| Ito 2019                                                          | Real-World Effectiveness of Sodium Glucose Co-Transporter-2 Inhibitors in Japanese Patients with Diabetes Mellitus                                                                                                                                       | Others    | MDV, JMDC                                                                   | Nationwide   |                                        | 2014 | 2016 | Intervention effect                       |                          | Endocrine, nutritional and metabolic diseases                                                       | diabetes                                        | Others        | ≥18 years of age                     |
| Kanai 2019                                                        | Characteristics and Early Hypoglycemic Medications of Patients at Risk of Progression to Type 2 Diabetes in Japan: A Retrospective Cohort Study of Health Checkup and Claims Data                                                                        | JMDC      |                                                                             | Nationwide   |                                        | 2005 | 2015 | Clinical epidemiology, course of diseases | Medical treatment status | Endocrine, nutritional and metabolic diseases                                                       | type 2 diabetes                                 | Others        | ≥40 years of age                     |
| Gouda 2018                                                        | Associations between eating habits and glycemic control and obesity in Japanese workers with type 2 diabetes mellitus                                                                                                                                    | JMDC      |                                                                             | Nationwide   |                                        | 2009 | 2015 | Clinical epidemiology, course of diseases |                          | Endocrine, nutritional and metabolic diseases                                                       | diabetes                                        |               |                                      |
| Ishii 2018                                                        | Comparative analysis between sodium-glucose Co-transporter 2 inhibitors and biguanides as add-on medications in patients with type 2 diabetes mellitus receiving dipeptidyl peptidase 4 inhibitors-results from analysis of real-world clinical database | MDV       |                                                                             | Nationwide   |                                        | 2013 | 2017 | Intervention effect                       |                          | Endocrine, nutritional and metabolic diseases                                                       | type 2 diabetes                                 |               |                                      |
| Kubota 2018                                                       | Penetration of new antidiabetic medications in East Asian countries and the United States: A cross-national comparative study                                                                                                                            | JMDC      | Taiwan, Hong Kong, Japan, US                                                | Nationwide   |                                        | 2006 | 2014 | Medical treatment status                  | Socioeconomic comparison | Endocrine, nutritional and metabolic diseases                                                       | type 2 diabetes                                 |               |                                      |

|                   |                                                                                                                                                                                                                      |        |                                                                                   |              |                                              |      |      |                                           |                                          |                                               |                                     |        |                                |
|-------------------|----------------------------------------------------------------------------------------------------------------------------------------------------------------------------------------------------------------------|--------|-----------------------------------------------------------------------------------|--------------|----------------------------------------------|------|------|-------------------------------------------|------------------------------------------|-----------------------------------------------|-------------------------------------|--------|--------------------------------|
| Ebata-Kogure 2017 | Clinical and economic burdens experienced by patients with painful diabetic peripheral neuropathy: An observational study using a Japanese claims database                                                           | MDV    |                                                                                   | Nationwide   |                                              | 2008 | 2015 | Clinical epidemiology, course of diseases | Health economics                         | Endocrine, nutritional and metabolic diseases | diabetic peripheral neuropathy      | Others | ≥18 years of age               |
| Chang 2016        | Epidemiology of lactic acidosis in type 2 diabetes patients with metformin in Japan                                                                                                                                  | MDV    |                                                                                   | Nationwide   |                                              | 2010 | 2014 | Intervention effect                       |                                          | Endocrine, nutritional and metabolic diseases | type 2 diabetes                     | Others | ≥18 years of age               |
| Fukuda 2016       | The Effects of Diagnostic Definitions in Claims Data on Healthcare Cost Estimates: Evidence from a Large-Scale Panel Data Analysis of Diabetes Care in Japan                                                         | JMDC   |                                                                                   | Nationwide   |                                              | 2005 | 2013 | Health economics                          | Medical treatment status                 | Endocrine, nutritional and metabolic diseases | type 2 diabetes                     | Others | ≥20 years of age               |
| Kurtyka 2016      | Adherence to dipeptidyl peptidase-4 inhibitor therapy among type 2 diabetes patients with employer-sponsored health insurance in Japan                                                                               | JMDC   |                                                                                   | Nationwide   |                                              | 2010 | 2013 | Patient health service utilization        |                                          | Endocrine, nutritional and metabolic diseases | type 2 diabetes                     | Others | 18-65 years old                |
| Heianza 2014      | Impact on short-term glycaemic control of initiating diabetes care versus leaving diabetes untreated among individuals with newly screening-detected diabetes in Japan                                               | JMDC   |                                                                                   | Nationwide   |                                              | 2009 | 2010 | Medical treatment status                  | Intervention effect                      | Endocrine, nutritional and metabolic diseases | diabetes                            |        |                                |
| Hidaka 2014       | [Prescription and Quality of Diabetes Care Provided by Specialists and General Physicians in Japan —An Analysis of Insurance Claim and Health Checkup Data—]                                                         | Others | SANYO Electric Group Health Insurance                                             | Others       | SANYO Electric Group Health Insurance        | 2012 | 2012 | Medical treatment status                  | Health policy evaluation and utilization | Endocrine, nutritional and metabolic diseases | diabetes                            | Others | 0-74 years old (beneficiaries) |
| Suzuki 2014       | [Examination of prescription status of new antidiabetic drugs using health insurance claims data*]                                                                                                                   | JMDC   |                                                                                   | Nationwide   |                                              | 2005 | 2012 | Medical treatment status                  |                                          | Endocrine, nutritional and metabolic diseases | diabetes                            | Others | 20-75 years old                |
| Kimura 2012       | Quantitative Evaluation of Compliance with Recommendation for Sulfonylurea Dose Co-Administered with DPP-4 Inhibitors in Japan                                                                                       | Others | Nihon-Chouzai pharmacy claims database                                            | Nationwide   | Nihon-Chouzai pharmacy claims database       | 2008 | 2010 | Medical treatment status                  | Health policy evaluation and utilization | Endocrine, nutritional and metabolic diseases | diabetes                            |        |                                |
| Kubo 2011         | Prevalence of type 2 diabetes among acute inpatients and its impact on length of hospital stay in Japan                                                                                                              | DPC    |                                                                                   | Nationwide   |                                              | 2008 | 2008 | Clinical epidemiology, course of diseases |                                          | Endocrine, nutritional and metabolic diseases | type 2 diabetes                     |        |                                |
| Yanase 2011       | [Utility Study of a Basic Database Collected from Patients with Diabetes Mellitus in 15 Hospitals by Retrospective Analysis]                                                                                         | MDV    | Patient Survey 2008 (MHLW)                                                        | Nationwide   | 15 medical facilities                        | 2006 | 2010 | Research methodology                      |                                          | Endocrine, nutritional and metabolic diseases | diabetes                            |        |                                |
| Kitazato 2010     | [A Method of Investigate Medical Expenditure in Japan in Relationship of Stage Progression of Type 2 Diabetes Mellitus Complications and Macroangiopathy]                                                            | JMDC   |                                                                                   | Nationwide   | 10 health insurance unions                   | 2003 | 2007 | Research methodology                      |                                          | Endocrine, nutritional and metabolic diseases | type 2 diabetes                     | Others | 40-74 years old                |
| Nagai 2021        | A Claims Database Analysis of Dose-Dependency of Metformin and Incidence of Lactic Acidosis in Japanese Patients with Type 2 Diabetes                                                                                | MDV    |                                                                                   | Nationwide   |                                              | 2008 | 2018 | Intervention effect                       |                                          | Endocrine, nutritional and metabolic diseases | Type 2 diabetes                     | Others | age ≥18 years                  |
| Nagai 2021        | Effects of Increasing Metformin Dose vs Adding/Switching to Dipeptidyl Peptidase-4 Inhibitors on Glycemic Control in Patients with Type 2 Diabetes                                                                   | MDV    |                                                                                   | Nationwide   |                                              | 2008 | 2018 | Intervention effect                       |                                          | Endocrine, nutritional and metabolic diseases | Type 2 diabetes                     | Others | age ≥18 years                  |
| Okada 2021        | Association between nutritional guidance or ophthalmological examination and discontinuation of physician visits in patients with newly diagnosed diabetes: A retrospective cohort study using a nationwide database | JMDC   |                                                                                   | Nationwide   |                                              | 2005 | 2018 | Patient health service utilization        | Quality of care                          | Endocrine, nutritional and metabolic diseases | diabetes                            | Others | age ≥20 years                  |
| Okada 2021        | Potassium Concentration in Initial Fluid Therapy and In-Hospital Mortality of Patients with Diabetic Ketoacidosis                                                                                                    | DPC    |                                                                                   | Nationwide   |                                              | 2010 | 2018 | Intervention effect                       |                                          | Endocrine, nutritional and metabolic diseases | patients with diabetic ketoacidosis | Others | age ≥20 years                  |
| Okui 2021         | Performance evaluation of case definitions of type 1 diabetes for health insurance claims data in Japan                                                                                                              | Others | Electronic healthcare records data and health insurance claims data in a hospital | Others       | a University Hospital                        | 2009 | 2019 | Research methodology                      |                                          | Endocrine, nutritional and metabolic diseases | type 1 diabetes                     |        |                                |
| Nishioka 2020     | Non-financial social determinants of diabetes among public assistance recipients in Japan: A cohort study                                                                                                            | Others | medical assistance claim data, municipal public assistance databases              | Municipality | two suburban municipalities, Osaka and Tokyo | 2016 | 2016 | Clinical epidemiology, course of diseases | Socioeconomic comparison                 | Endocrine, nutritional and metabolic diseases | diabetes                            |        |                                |
| Nishioka 2020     | Incidence and seasonality of type 1 diabetes: a population-based 3-year cohort study using the National Database in Japan                                                                                            | NDB    |                                                                                   | Nationwide   |                                              | 2013 | 2018 | Clinical epidemiology, course of diseases |                                          | Endocrine, nutritional and metabolic diseases | Type 1 diabetes                     |        | age groups                     |
| Oh 2020           | Comparison of persistence and adherence between DPP-4 inhibitor administration frequencies in patients with type 2 diabetes mellitus in Japan: a claims-based cohort study                                           | MDV    |                                                                                   | Nationwide   |                                              | 2015 | 2018 | Medical treatment status                  | Patient health service utilization       | Endocrine, nutritional and metabolic diseases | type 2 diabetes                     | Others | age ≥18 years                  |
| Yaguchi 2020      | Skipping breakfast, late-night eating and current smoking are associated with medication adherence in Japanese patients with diabetes                                                                                | JMDC   |                                                                                   | Nationwide   |                                              | 2008 | 2014 | Patient health service utilization        |                                          | Endocrine, nutritional and metabolic diseases | diabetes                            | Others | aged 18-74 years               |
| Morita 2019       | Treatment patterns of drug-naïve patients with type 2 diabetes mellitus: a retrospective cohort study using a Japanese hospital database                                                                             | MDV    |                                                                                   | Nationwide   |                                              | 2012 | 2016 | Medical treatment status                  |                                          | Endocrine, nutritional and metabolic diseases | type 2 diabetes                     | Others | aged ≥18 years                 |
| Nishi 2019        | Association between income levels and irregular physician visits after a health checkup, and its consequent effect on glycemic control among employees: A retrospective propensity score-matched cohort study        | JHIA   | Fukuoka branch of the Japanese Health Insurance Association                       | Prefecture   | Fukuoka                                      | 2011 | 2013 | Patient health service utilization        | Socioeconomic comparison                 | Endocrine, nutritional and metabolic diseases | diabetes                            | Others | aged 40-64 years               |
| Nishimura 2019    | Treatment patterns, persistence and adherence rates in patients with type 2 diabetes mellitus in Japan: a claims-based cohort study                                                                                  | Others | JMDC, MDV                                                                         | Nationwide   |                                              | 2011 | 2015 | Medical treatment status                  | Patient health service utilization       | Endocrine, nutritional and metabolic diseases | type 2 diabetes                     | Others | aged ≥18 years                 |
| Nishimura 2019    | Comparison of persistence and adherence between fixed-dose combinations and two-pill combinations in Japanese patients with type 2 diabetes                                                                          | Others | JMDC, MDV                                                                         | Nationwide   |                                              | 2011 | 2015 | Medical treatment status                  | Patient health service utilization       | Endocrine, nutritional and metabolic diseases | type 2 diabetes                     | Others | aged ≥18 years                 |
| Sugiyama 2019     | Variation in process quality measures of diabetes care by region and institution in Japan during 2015-2016: An observational study of nationwide claims data                                                         | NDB    |                                                                                   | Nationwide   |                                              | 2015 | 2016 | Quality of care                           | Socioeconomic comparison                 | Endocrine, nutritional and metabolic diseases | diabetes                            | Others | aged ≥20 years                 |
| Suzuki 2019       | Analysis on Real World Data (RWD) using a machine learning model-exploration of the factors affecting the utility of oral hypoglycemic agents                                                                        | MDV    |                                                                                   | Nationwide   |                                              | 2008 | 2017 | Clinical epidemiology, course of diseases | Research methodology                     | Endocrine, nutritional and metabolic diseases | diabetes                            | Others | aged ≥18 years                 |
| Tanaka 2019       | Changes in the quality of diabetes care in Japan between 2007 and 2015: A repeated cross-sectional study using claims data                                                                                           | JMDC   |                                                                                   | Nationwide   |                                              | 2006 | 2016 | Quality of care                           |                                          | Endocrine, nutritional and metabolic diseases | diabetes                            | Others | aged 20-69 years               |

|                 |                                                                                                                                                                                                                                                                                                                                                                                 |           |                                                       |              |                                                 |      |      |                                           |                                          |                                               |                                    |                                                          |        |                        |
|-----------------|---------------------------------------------------------------------------------------------------------------------------------------------------------------------------------------------------------------------------------------------------------------------------------------------------------------------------------------------------------------------------------|-----------|-------------------------------------------------------|--------------|-------------------------------------------------|------|------|-------------------------------------------|------------------------------------------|-----------------------------------------------|------------------------------------|----------------------------------------------------------|--------|------------------------|
| Ukai 2019       | Effectiveness of monthly and bimonthly follow-up of patients with well-controlled type 2 diabetes: a propensity score matched cohort study                                                                                                                                                                                                                                      | NHI/LSEHS | NHI                                                   | Municipality | Tsu city                                        | 2011 | 2014 | Intervention effect                       | Medical treatment status                 | Endocrine, nutritional and metabolic diseases |                                    | type 2 diabetes                                          |        |                        |
| Zhou 2019       | Identification of subgroups of patients with type 2 diabetes with differences in renal function preservation, comparing patients receiving sodium-glucose co-transporter-2 inhibitors with those receiving dipeptidyl peptidase-4 inhibitors, using a supervised machine-learning algorithm (PROFILE study): A retrospective analysis of a Japanese commercial medical database | MDV       |                                                       | Nationwide   |                                                 | 2014 | 2016 | Intervention effect                       | Medical treatment status                 | Endocrine, nutritional and metabolic diseases |                                    | type 2 diabetes                                          | Others | aged ≥18 years         |
| Nishimura 2018  | Efficacy of metformin add-on therapy to dipeptidyl peptidase-4 inhibitors in Japanese patients with type 2 diabetes mellitus in real-world clinical practice settings: A retrospective analysis of a health insurance administrative claims database                                                                                                                            | MDV       |                                                       | Nationwide   |                                                 | 2010 | 2015 | Intervention effect                       |                                          | Endocrine, nutritional and metabolic diseases |                                    | type 2 diabetes                                          | Others | aged ≥18 years         |
| Nishimura 2018  | Effectiveness of a dipeptidyl peptidase-4 inhibitor as add-on therapy to metformin and of dose-escalation of metformin in Japanese patients with type 2 diabetes mellitus in real-world clinical practice settings: a retrospective analysis of a medical information database                                                                                                  | MDV       |                                                       | Nationwide   |                                                 | 2010 | 2015 | Intervention effect                       |                                          | Endocrine, nutritional and metabolic diseases |                                    | type 2 diabetes                                          | Others | aged ≥18 years         |
| Suzuki 2018     | Characteristics, Treatment Patterns, and Economic Outcomes of Patients Initiating Injectable Medications for Management of Type 2 Diabetes Mellitus in Japan: Results from a Retrospective Claims Database Analysis                                                                                                                                                             | JMDC      |                                                       | Nationwide   |                                                 | 2011 | 2015 | Medical treatment status                  | Health economics                         | Endocrine, nutritional and metabolic diseases |                                    | Type 2 diabetes                                          | Others | aged ≥18 years         |
| Takeuchi 2018   | Population-based incidence of diabetic ketoacidosis in type 2 diabetes: medical claims data analysis in Japan                                                                                                                                                                                                                                                                   | JMDC      |                                                       | Nationwide   |                                                 | 2005 | 2013 | Clinical epidemiology, course of diseases |                                          | Endocrine, nutritional and metabolic diseases |                                    | Diabetes, Diabetic ketoacidosis                          | Others | aged 20-74 years       |
| Tamura 2018     | A study on the prescription status of metformin and DPP-4 inhibitors in patients with type 2 diabetes mellitus in Japan: An analysis of time trends by use of a health insurance administrative claims database                                                                                                                                                                 | JMDC      |                                                       | Nationwide   |                                                 | 2011 | 2016 | Medical treatment status                  |                                          | Endocrine, nutritional and metabolic diseases |                                    | Type 2 diabetes                                          |        |                        |
| Yamashita 2018  | [The Differences between the Two Island Towns in Medical Expenses of the National Health Insurance Concerning about Diabetes]                                                                                                                                                                                                                                                   | NHI/LSEHS | NHI                                                   | Municipality | Okino-shi ma-cho and Ama-cho in the Oki islands | 2016 | 2016 | Health economics                          |                                          | Endocrine, nutritional and metabolic diseases |                                    | Diabetes                                                 |        |                        |
| Ono 2017        | Impact of clinic follow-up visits on body weight control in people with prediabetes or diabetes mellitus: Japanese nonelderly cohort study                                                                                                                                                                                                                                      | JMDC      |                                                       | Nationwide   |                                                 | 2013 | 2014 | Medical treatment status                  | Intervention effect                      | Endocrine, nutritional and metabolic diseases |                                    | Diabetes                                                 | Others | aged 40-74 years       |
| Tamura 2017     | A study on the prescription status of metformin and DPP-4 inhibitors in patients with type 2 diabetes mellitus in Japan: An analysis of data from health insurance administrative claims                                                                                                                                                                                        | JMDC      |                                                       | Nationwide   |                                                 | 2016 | 2016 | Medical treatment status                  |                                          | Endocrine, nutritional and metabolic diseases |                                    | Type 2 diabetes                                          |        |                        |
| Tanabe 2017     | Prescription of oral hypoglycemic agents for patients with type 2 diabetes mellitus: A retrospective cohort study using a Japanese hospital database                                                                                                                                                                                                                            | MDV       |                                                       | Nationwide   |                                                 | 2008 | 2013 | Medical treatment status                  |                                          | Endocrine, nutritional and metabolic diseases |                                    | Type 2 diabetes                                          | Others | aged 40-70 years       |
| Tanaka 2016     | Process quality of diabetes care under favorable access to healthcare: a 2-year longitudinal study using claims data in Japan                                                                                                                                                                                                                                                   | JMDC      |                                                       | Nationwide   |                                                 | 2010 | 2012 | Quality of care                           |                                          | Endocrine, nutritional and metabolic diseases |                                    | diabetes                                                 | Others | aged 20-69 years       |
| Kishi 2013      | (Hypoglycemia due to the Combination of Sitagliptin and a SU Drug, and Changes in the Daily Dose of the SU Drug Based on the New Safety Measures)                                                                                                                                                                                                                               | JMDC      |                                                       | Nationwide   |                                                 | 2009 | 2010 | Medical treatment status                  | Health policy evaluation and utilization | Endocrine, nutritional and metabolic diseases |                                    | diabetes                                                 |        |                        |
| Tomio 2010      | Quality of care for diabetes patients using National Health Insurance claims data in Japan                                                                                                                                                                                                                                                                                      | NHI/LSEHS | NHI                                                   | Municipality | two separate towns in Kumamoto Prefecture       | 2006 | 2007 | Quality of care                           |                                          | Endocrine, nutritional and metabolic diseases |                                    | diabetes                                                 |        |                        |
| Kosiborod 2018  | Cardiovascular Events Associated With SGLT-2 Inhibitors Versus Other Glucose-Lowering Drugs: The CVD-REAL 2 Study                                                                                                                                                                                                                                                               | MDV       |                                                       | Nationwide   | 6 countries                                     | 2013 | 2017 | Intervention effect                       |                                          | Endocrine, nutritional and metabolic diseases |                                    | type 2 diabetes (New users of SGLT-2i and oGLDs)         | Others | aged ≥18 years         |
| Kohro 2013      | Trends in antidiabetic prescription patterns in Japan from 2005 to 2011                                                                                                                                                                                                                                                                                                         | JMDC      |                                                       | Nationwide   |                                                 | 2005 | 2011 | Medical treatment status                  |                                          | Endocrine, nutritional and metabolic diseases |                                    | diabetes mellitus                                        | Others | aged ≥20 years         |
| Yabe 2015       | Use of the Japanese health insurance claims database to assess the risk of acute pancreatitis in patients with diabetes: comparison of DPP-4 inhibitors with other oral antidiabetic drugs                                                                                                                                                                                      | JMDC      |                                                       | Nationwide   |                                                 | 2009 | 2013 | Intervention effect                       |                                          | Endocrine, nutritional and metabolic diseases | Diseases of the digestive system   | diabetes, acute pancreatitis                             | Others | aged 30-74 years       |
| Urushihara 2012 | Increased Risk of Acute Pancreatitis in Patients with Type 2 Diabetes: An Observational Study Using a Japanese Hospital Database                                                                                                                                                                                                                                                | MDV       |                                                       | Nationwide   |                                                 | 2003 | 2010 | Clinical epidemiology, course of diseases |                                          | Endocrine, nutritional and metabolic diseases | Diseases of the digestive system   | diabetes, acute pancreatitis                             | Others | aged 18 years or more  |
| Kaku 2019       | Cost-effectiveness Analysis of Empagliflozin in Japan Based on Results From the Asian subpopulation in the EMPA-REG OUTCOME Trial                                                                                                                                                                                                                                               | MDV       |                                                       | Nationwide   |                                                 | 2016 | 2017 | Health economics                          |                                          | Endocrine, nutritional and metabolic diseases | Diseases of the circulatory system | type 2 diabetes mellitus, cardiovascular and renal event |        |                        |
| Fujiwara 2021   | Accuracy of Japanese claims data in identifying diabetes-related complications                                                                                                                                                                                                                                                                                                  | DPC       | electronic medical chart reviews as the gold standard | Others       | Niigata University Medical & Dental Hospital    | 2018 | 2018 | Research methodology                      |                                          | Endocrine, nutritional and metabolic diseases | Diseases of the circulatory system | diabetesrelated complications                            |        |                        |
| Kohsaka 2020    | Incidence of adverse cardiovascular events in type 2 diabetes mellitus patients after initiation of glucose-lowering agents: A population-based community study from the Shizuoka Kokuho database                                                                                                                                                                               | NHI/LSEHS | Shizuoka Kokuho database                              | Prefecture   | Shizuoka                                        | 2013 | 2018 | Intervention effect                       |                                          | Endocrine, nutritional and metabolic diseases | Diseases of the circulatory system | type 2 diabetes, adverse cardiovascular events           | Others | ≥40 years of age       |
| Komamine 2019   | Cardiovascular risks associated with dipeptidyl peptidase-4 inhibitors monotherapy compared with other antidiabetes drugs in the Japanese population: A nationwide cohort study                                                                                                                                                                                                 | NDB       |                                                       | Nationwide   |                                                 | 2010 | 2014 | Intervention effect                       |                                          | Endocrine, nutritional and metabolic diseases | Diseases of the circulatory system | diabetes, cardiovascular disease                         |        | age categories         |
| Seino 2021      | Cardiovascular and renal effectiveness of empagliflozin in routine care in East Asia: Results from the EMPRISE East Asia study                                                                                                                                                                                                                                                  | MDV       |                                                       | Nationwide   | (Japan, South Korea and Taiwan)                 | 2014 | 2018 | Intervention effect                       |                                          | Endocrine, nutritional and metabolic diseases | Diseases of the circulatory system | Diabetes, cardiovascular, renal                          | Others | aged 18 years or older |
| Nishioka 2020   | Absolute risk of acute coronary syndrome after severe hypoglycemia: A population-based 2-year cohort study using the National Database in Japan                                                                                                                                                                                                                                 | NDB       |                                                       | Nationwide   |                                                 | 2014 | 2016 | Clinical epidemiology, course of diseases |                                          | Endocrine, nutritional and metabolic diseases | Diseases of the circulatory system | Diabetes, acute coronary syndrome                        | Others | aged ≥35 years         |

|                    |                                                                                                                                                                                                                          |           |                                                                                        |            |                                               |      |      |                                           |                                           |                                               |                                      |                                                                                                 |               |                          |
|--------------------|--------------------------------------------------------------------------------------------------------------------------------------------------------------------------------------------------------------------------|-----------|----------------------------------------------------------------------------------------|------------|-----------------------------------------------|------|------|-------------------------------------------|-------------------------------------------|-----------------------------------------------|--------------------------------------|-------------------------------------------------------------------------------------------------|---------------|--------------------------|
| Ono 2020           | Validity of Claims Diagnosis Codes for Cardiovascular Diseases in Diabetes Patients in Japanese Administrative Database                                                                                                  | Others    | HCEI, patient-level electronic medical record and claims data                          | Nationwide | (approximately 200 hospitals)                 | 2006 | 2018 | Research methodology                      |                                           | Endocrine, nutritional and metabolic diseases | Diseases of the circulatory system   | Diabetes, Cardiovascular Diseases                                                               |               |                          |
| Yamada-Harada 2019 | Relationship Between Number of Multiple Risk Factors and Coronary Artery Disease Risk With and Without Diabetes Mellitus                                                                                                 | JMDC      |                                                                                        | Nationwide |                                               | 2008 | 2016 | Clinical epidemiology, course of diseases |                                           | Endocrine, nutritional and metabolic diseases | Diseases of the circulatory system   | Coronary artery disease risk with and without diabetes mellitus                                 | Others        | aged 18 to 72 years      |
| Yamada 2016        | Postoperative outcomes of major lower extremity amputations in patients with diabetes and peripheral artery disease: analysis using the Diagnosis Procedure Combination database in Japan                                | DPC       |                                                                                        | Nationwide |                                               | 2007 | 2012 | Intervention effect                       |                                           | Endocrine, nutritional and metabolic diseases | Diseases of the circulatory system   | diabetes, peripheral artery disease                                                             |               |                          |
| Goto 2016          | [Association between severe hypoglycemia and the onset of cardiovascular disease in patients with type 2 diabetes: A study using multiple definitions of severe hypoglycemia]*                                           | JMDC      |                                                                                        | Nationwide |                                               | 2005 | 2014 | Clinical epidemiology, course of diseases |                                           | Endocrine, nutritional and metabolic diseases | Diseases of the circulatory system   | Type 2 diabetes, hypoglycemia, cardiovascular disease                                           | Others        | aged 18-74 years         |
| Nishi 2014         | Risk of hospitalization for diabetic macrovascular complications and in-hospital mortality with irregular physician visits using propensity score matching                                                               | NHI/LSEHS | Fukuoka National Health Insurance Organization                                         | Prefecture | Fukuoka                                       | 2009 | 2010 | Intervention effect                       | Patient health service utilization        | Endocrine, nutritional and metabolic diseases | Diseases of the circulatory system   | diabetic macrovascular complications                                                            |               |                          |
| Wake 2019          | Adherence and persistence to hyperlipidemia medications in patients with atherosclerotic cardiovascular disease and those with diabetes mellitus based on administrative claims data in Japan                            | Others    | JMDC and MDV                                                                           | Nationwide |                                               | 2014 | 2015 | Medical treatment status                  | Patient health service utilization        | Endocrine, nutritional and metabolic diseases | Diseases of the circulatory system   | hyperlipidemia patients with diabetes mellitus or prior atherosclerotic cardiovascular diseases | Others        | age >18 years            |
| Nagar 2018         | Treatment Patterns, Statin Intolerance, and Subsequent Cardiovascular Events Among Japanese Patients With High Cardiovascular Risk Initiating Statin Therapy                                                             | JMDC      |                                                                                        | Nationwide |                                               | 2006 | 2014 | Medical treatment status                  | Intervention effect                       | Endocrine, nutritional and metabolic diseases | Diseases of the circulatory system   | atherosclerotic cardiovascular disease, diabetes mellitus                                       | Others        | at least 18 years of age |
| Ide 2010           | Relationships between diabetes and medical and dental care costs: findings from a worksite cohort study in Japan                                                                                                         | Others    | a mutual aid association (periodic health examinations and biennial oral examinations) | Prefecture | a prefecture in southwestern Japan            | 2000 | 2005 | Health economics                          |                                           | Endocrine, nutritional and metabolic diseases | Diseases of the digestive system     | diabetes, medial and dental care costs                                                          | Others        | 40-54 years old          |
| Shin 2021          | Effects of periodontal management for patients with type 2 diabetes on healthcare expenditure, hospitalization and worsening of diabetes: an observational study using medical, dental and pharmacy claims data in Japan | NHI/LSEHS | National Health Insurance (NHI) and the Medical Care System for the Elderly            | Prefecture | a prefecture                                  | 2015 | 2016 | Intervention effect                       | Health economics                          | Endocrine, nutritional and metabolic diseases | Diseases of the digestive system     | Diabetes, periodontal                                                                           | Others        | aged ≥35 years           |
| Suzuki 2021        | Evaluation of Public Health Expenditure by Number of Teeth among Outpatients with Diabetes Mellitus                                                                                                                      | NDB       |                                                                                        | Nationwide |                                               | 2015 | 2016 | Clinical epidemiology, course of diseases | Health economics                          | Endocrine, nutritional and metabolic diseases | Diseases of the digestive system     | Diabetes, periodontitis                                                                         | Others        | aged 50-74 years         |
| Suzuki 2020        | Evaluation of tooth loss among patients with diabetes mellitus using the National Database of Health Insurance Claims and Specific Health Checkups of Japan                                                              | NDB       |                                                                                        | Nationwide |                                               | 2015 | 2016 | Clinical epidemiology, course of diseases |                                           | Endocrine, nutritional and metabolic diseases | Diseases of the digestive system     | diabetes, tooth loss                                                                            | Others        | aged 50-74 years         |
| Suzuki 2019        | Relationship between Blood HbA1c Level and Decayed Teeth in Patients with Type 2 Diabetes: A Cross-sectional Study                                                                                                       | Others    | MinaCare (results of dental examinations)                                              | Nationwide |                                               | 2013 | 2013 | Clinical epidemiology, course of diseases |                                           | Endocrine, nutritional and metabolic diseases | Diseases of the digestive system     | diabetes, decayed teeth                                                                         | Others        | aged 40-59 years         |
| Saito 2017         | Association between dental visits for periodontal treatment and type 2 diabetes mellitus in an elderly Japanese cohort                                                                                                   | NHI/LSEHS | late-stage medical care system for the older population                                | Prefecture | Mie                                           | 2014 | 2014 | Medical treatment status                  | Clinical epidemiology, course of diseases | Endocrine, nutritional and metabolic diseases | Diseases of the digestive system     | periodontal treatment, type 2 diabetes mellitus                                                 | Older persons | aged 75 or 80 years      |
| Osawa 2021         | Severity of hypertension as a predictor of initiation of dialysis among study participants with and without diabetes mellitus                                                                                            | JMDC      |                                                                                        | Nationwide |                                               | 2008 | 2016 | Clinical epidemiology, course of diseases |                                           | Endocrine, nutritional and metabolic diseases | Diseases of the genitourinary system | Diabetes, dialysis                                                                              | Others        | aged 19-72 years         |
| Osawa 2019         | Higher pulse pressure predicts initiation of dialysis in Japanese patients with diabetes                                                                                                                                 | JMDC      |                                                                                        | Nationwide |                                               | 2008 | 2013 | Clinical epidemiology, course of diseases |                                           | Endocrine, nutritional and metabolic diseases | Diseases of the genitourinary system | diabetes, Dialysis                                                                              | Others        | aged 19-72 years         |
| Ebihara 2019       | [A fact-finding survey of lifestyle-related diseases such as diabetes and the introduction of new dialysis in Miyazaki Prefecture]*                                                                                      | NHI/LSEHS | National Health Insurance and Later-Stage Elderly Healthcare System                    | Prefecture | Miyazaki                                      | 2015 | 2016 | Medical treatment status                  |                                           | Endocrine, nutritional and metabolic diseases | Diseases of the genitourinary system | Diabetes, dialysis                                                                              |               |                          |
| Nogami 2017        | Risk of disseminated intravascular coagulation in patients with type 2 diabetes mellitus: retrospective cohort study                                                                                                     | MDV       |                                                                                        | Nationwide |                                               | 2010 | 2014 | Clinical epidemiology, course of diseases |                                           | Endocrine, nutritional and metabolic diseases |                                      | Diabetes, disseminated intravascular coagulation                                                | Others        | aged 18-79 years         |
| Ooba 2017          | Lipid-lowering drugs and risk of new-onset diabetes: a cohort study using Japanese healthcare data linked to clinical data for health screening                                                                          | JMDC      |                                                                                        | Nationwide |                                               | 2005 | 2011 | Intervention effect                       |                                           | Endocrine, nutritional and metabolic diseases |                                      | Diabetes, lipid-lowering drugs                                                                  | Others        | aged 20 to 74 years      |
| Kawamura 2018      | Influence of comorbidities on the implementation of the fundus examination in patients with newly diagnosed type 2 diabetes                                                                                              | JMDC      |                                                                                        | Nationwide |                                               | 2005 | 2013 | Patient health service utilization        |                                           | Endocrine, nutritional and metabolic diseases | Diseases of the eye and adnexa       | type 2 diabetes, diabetic eye examination                                                       | Others        | >20 years of age         |
| Kawasaki 2018      | Lipid-lowering medication is associated with decreased risk of diabetic retinopathy and the need for treatment in patients with type 2 diabetes: A real-world observational analysis of a health claims database         | JMDC      |                                                                                        | Nationwide |                                               | 2005 | 2017 | Intervention effect                       |                                           | Endocrine, nutritional and metabolic diseases | Diseases of the eye and adnexa       | type 2 diabetes, diabetic retinopathy                                                           | Others        | ≥18 years of age         |
| Yamamoto 2019      | Pulse Pressure is a Stronger Predictor Than Systolic Blood Pressure for Severe Eye Diseases in Diabetes Mellitus                                                                                                         | JMDC      |                                                                                        | Nationwide |                                               | 2008 | 2015 | Clinical epidemiology, course of diseases |                                           | Endocrine, nutritional and metabolic diseases | Diseases of the eye and adnexa       | diabetic retinopathy                                                                            | Others        | aged 19-72 years         |
| Roughead 2015      | Variation in Association Between Thiazolidinediones and Heart Failure Across Ethnic Groups: Retrospective analysis of Large Healthcare Claims Databases in Six Countries                                                 | JMDC      |                                                                                        | Nationwide | Australia, Hong Kong, Japan, Korea and Taiwan | 2005 | 2010 | Intervention effect                       | Socioeconomic comparison                  | Endocrine, nutritional and metabolic diseases | Diseases of the circulatory system   | diabetes, heart failure, edema                                                                  |               |                          |
| Sekimoto 2015      | Supplier-Induced Demand for Chronic Disease Care in Japan: Multilevel Analysis of the Association between Physician Density and Physician-Patient Encounter Frequency                                                    | JHIA      | patient surveys (MHLW).                                                                | Nationwide |                                               | 2013 | 2013 | Health policy evaluation and utilization  | Health economics                          | Endocrine, nutritional and metabolic diseases | Diseases of the circulatory system   | Chronic Disease Care (hypertension, diabetes)                                                   | Others        | at least 20 years old    |
| Mitsutake 2020     | Association of pharmacological treatments for hypertension, diabetes, and dyslipidemia with health checkup participation and identification of disease control factors among older adults in Tokyo, Japan                | NHI/LSEHS | Tokyo Extended Association of Medical Care for Latter-Stage Older People               | Prefecture | Tokyo                                         | 2013 | 2014 | Medical treatment status                  | Patient health service utilization        | Endocrine, nutritional and metabolic diseases | Diseases of the circulatory system   | diabetes, hypertension, dyslipidemia                                                            | Older persons | ≥75 years of age         |

|                 |                                                                                                                                                                                                                    |           |                                                                                                                        |              |                                         |      |      |                                           |                                           |                                               |                                                              |                                                      |          |                        |
|-----------------|--------------------------------------------------------------------------------------------------------------------------------------------------------------------------------------------------------------------|-----------|------------------------------------------------------------------------------------------------------------------------|--------------|-----------------------------------------|------|------|-------------------------------------------|-------------------------------------------|-----------------------------------------------|--------------------------------------------------------------|------------------------------------------------------|----------|------------------------|
| Hashiguchi 2019 | Occupational Health Services Improve Effective Coverage for Hypertension and Diabetes Mellitus at Japanese Companies                                                                                               | Others    | general medical exam data, human resources information, and medical claims data (at a general electrical manufacturer) | Others       | a general electric al manufacturer      | 2011 | 2012 | Health policy evaluation and utilization  |                                           | Endocrine, nutritional and metabolic diseases | Diseases of the circulatory system                           | diabetes, hypertension                               | Others   | 40-59 years old        |
| Hara 2018       | Association measures of claims-based algorithms for common chronic conditions were assessed using regularly collected data in Japan                                                                                | JMDC      |                                                                                                                        | Nationwide   |                                         | 2013 | 2015 | Prediction model                          | Clinical epidemiology, course of diseases | Endocrine, nutritional and metabolic diseases | Diseases of the circulatory system                           | diabetes, hypertension, dyslipidemia                 |          |                        |
| Fujita 2015     | Validity assessment of self-reported medication use by comparing to pharmacy insurance claims                                                                                                                      | NHI/LSEHS | NHI (self-reported questionnaire required in the health check-up)                                                      | Municipality | Chiba City                              | 2012 | 2013 | Research methodology                      |                                           | Endocrine, nutritional and metabolic diseases | Diseases of the circulatory system                           | diabetes, dyslipidemia, hypertension                 | Others   | 40-74 years old        |
| Katada 2012     | [Medication Adhesion to Calcium Channel Blocker and HMG-CoA Reductase Inhibitor in Patients with Diabetes and Beneficial Effects of a Single Pill Amlodipine/Atorvastatin]                                         | Others    | pharmacy claims data                                                                                                   | Nationwide   | pharmacy claims data (100 dispensaries) | 2011 | 2011 | Patient health service utilization        |                                           | Endocrine, nutritional and metabolic diseases | Diseases of the circulatory system                           | diabetes, dyslipidemia, hypertension                 |          |                        |
| Katada 2012     | [Adherence and Persistence of a Single Pill Amlodipine/Atorvastatin vs. Two Pill Regimen Based on Japanese Health Insurance Claims]                                                                                | Others    | pharmacy claims data                                                                                                   | Nationwide   | pharmacy claims data (100 dispensaries) | 2011 | 2011 | Patient health service utilization        |                                           | Endocrine, nutritional and metabolic diseases | Diseases of the circulatory system                           | dyslipidemia, hypertension                           |          |                        |
| Yamana 2020     | Association between mandatory health examination attendance and diabetes treatment initiation among employees being treated for hypertension                                                                       | JMDC      |                                                                                                                        | Nationwide   |                                         | 2012 | 2016 | Patient health service utilization        |                                           | Endocrine, nutritional and metabolic diseases | Diseases of the circulatory system                           | diabetes, hypertension                               | Others   | aged 40-59 years       |
| Hori 2020       | Real-world risk of hypoglycemia-related hospitalization in Japanese patients with type 2 diabetes using SGLT2 inhibitors: a nationwide cohort study                                                                | MDV       |                                                                                                                        | Nationwide   |                                         | 2014 | 2019 | Clinical epidemiology, course of diseases | Intervention effect                       | Endocrine, nutritional and metabolic diseases |                                                              | type 2 diabetes, hypoglycemia                        | Others   | ≥18 years of age       |
| Ikeda 2019      | Retrospective analysis of medical costs and resource utilization for severe hypoglycemic events in patients with type 2 diabetes in Japan                                                                          | MDV       |                                                                                                                        | Nationwide   |                                         | 2008 | 2014 | Health economics                          |                                           | Endocrine, nutritional and metabolic diseases |                                                              | diabetes, hypoglycemic events                        |          |                        |
| Ikeda 2018      | Incidence rate and patient characteristics of severe hypoglycemia in treated type 2 diabetes mellitus patients in Japan: Retrospective Diagnosis Procedure Combination database analysis                           | MDV       |                                                                                                                        | Nationwide   |                                         | 2008 | 2015 | Clinical epidemiology, course of diseases |                                           | Endocrine, nutritional and metabolic diseases |                                                              | type 2 diabetes, hypoglycemia                        | Others   | >20 years of age       |
| Bennett 2016    | Association between therapy with dipeptidyl peptidase-4 (DPP-4) inhibitors and risk of ileus: a cohort study                                                                                                       | MDV       |                                                                                                                        | Nationwide   |                                         | 2010 | 2014 | Intervention effect                       |                                           | Endocrine, nutritional and metabolic diseases | Diseases of the digestive system                             | type 2 diabetes, ileus                               | Others   | ≥40 years of age       |
| Nishioka 2021   | Association between influenza and the incidence rate of new-onset type 1 diabetes in Japan                                                                                                                         | NDB       |                                                                                                                        | Nationwide   |                                         | 2013 | 2018 | Clinical epidemiology, course of diseases |                                           | Endocrine, nutritional and metabolic diseases | Diseases of the respiratory system                           | type 1 diabetes, influenza                           |          |                        |
| Heerspink 2020  | Kidney outcomes associated with use of SGLT2 inhibitors in real-world clinical practice (CVD-REAL 3): a multinational observational cohort study                                                                   | MDV       | five countries                                                                                                         | Nationwide   |                                         | 2014 | 2017 | Intervention effect                       |                                           | Endocrine, nutritional and metabolic diseases | Diseases of the genitourinary system                         | type 2 diabetes, Kidney outcomes                     | Others   | age 18 years or older  |
| Miyazaki 2015   | Does antihypertensive treatment with renin-angiotensin system inhibitors prevent the development of diabetic kidney disease?                                                                                       | Others    | health insurance societies located in the Japanese prefectures of Fukuoka and Shizuoka                                 | Prefecture   | Fukuoka and Shizuoka                    | 2011 | 2013 | Intervention effect                       |                                           | Endocrine, nutritional and metabolic diseases | Diseases of the genitourinary system                         | diabetic kidney disease                              | Others   | ≥40 years of age       |
| Ono 2020        | Association Between Routine Nephropathy Monitoring and Subsequent Change in Estimated Glomerular Filtration Rate in Patients With Diabetes Mellitus: A Japanese Non-Elderly Cohort Study                           | JMDC      |                                                                                                                        | Nationwide   |                                         | 2005 | 2016 | Quality of care                           | Intervention effect                       | Endocrine, nutritional and metabolic diseases | Diseases of the genitourinary system                         | Diabetes, non-diabetic kidney diseases               | Others   | age ≥18 years          |
| Sugiyama 2019   | Risk-Stratified Incidence of Renal Replacement Therapy Initiation: A Longitudinal Analysis Using Medical Claims and Health Checkup Data                                                                            | NHI/LSEHS | NHI                                                                                                                    | Municipality | a large city within the Tokyo           | 2012 | 2017 | Clinical epidemiology, course of diseases | Medical treatment status                  | Endocrine, nutritional and metabolic diseases | Diseases of the genitourinary system                         | diabetes, Renal Replacement Therapy                  | Others   | aged 40-74 years       |
| Yamamoto 2019   | Overt Proteinuria, Moderately Reduced eGFR and Their Combination Are Predictive of Severe Diabetic Retinopathy or Diabetic Macular Edema in Diabetes                                                               | JMDC      |                                                                                                                        | Nationwide   |                                         | 2008 | 2017 | Clinical epidemiology, course of diseases |                                           | Endocrine, nutritional and metabolic diseases | Diseases of the genitourinary system                         | diabetes, overt proteinuria, moderately reduced eGFR |          |                        |
| Chang 2020      | Incidence and causes of mildly to moderately elevated aminotransferase in Japanese patients with type 2 diabetes                                                                                                   | MDV       |                                                                                                                        | Nationwide   |                                         | 2010 | 2016 | Clinical epidemiology, course of diseases |                                           | Endocrine, nutritional and metabolic diseases | Diseases of the digestive system                             | Type 2 Diabetes, liver disease                       | Others   | ≥18 years of age       |
| Sato 2016       | Fracture risk and healthcare resource utilization and costs among osteoporosis patients with type 2 diabetes mellitus and without diabetes mellitus in Japan: retrospective analysis of a hospital claims database | MDV       |                                                                                                                        | Nationwide   |                                         | 2008 | 2013 | Clinical epidemiology, course of diseases | Health economics                          | Endocrine, nutritional and metabolic diseases | Diseases of the musculoskeletal system and connective tissue | diabetes, osteoporosis                               | Others   | aged 50 years or older |
| Takeuchi 2021   | Sodium-glucose cotransporter-2 inhibitors and the risk of urinary tract infection among diabetic patients in Japan: Target trial emulation using a nationwide administrative claims database                       | NDB       |                                                                                                                        | Nationwide   |                                         | 2014 | 2015 | Intervention effect                       |                                           | Endocrine, nutritional and metabolic diseases | Diseases of the genitourinary system                         | Diabetes, urinary tract infection (UTI)              | Others   | aged ≥40 years         |
| Nozawa 2021     | Antidiabetic Drug Prescriptions and Lipid Control Status After Unfavorable Annual Health Checkup Results: A Retrospective Cohort Study Using a Health Insurance Database                                           | Others    | MinaCare                                                                                                               | Nationwide   |                                         | 2015 | 2017 | Patient health service utilization        |                                           | Endocrine, nutritional and metabolic diseases |                                                              | dyslipidemia                                         | Others   | aged 20-74 years       |
| Umeda 2019      | Medication Adherence/Persistence and Demographics of Japanese Dyslipidemia Patients on Statin-Ezetimibe as a Separate Pill Combination Lipid-Lowering Therapy - An Observational Pharmacy Claims Database Study    | Others    | the IQVIA National Prescription Audit database                                                                         | Nationwide   |                                         | 2015 | 2018 | Patient health service utilization        |                                           | Endocrine, nutritional and metabolic diseases |                                                              | dyslipidemia                                         | Others   | aged ≥20 years         |
| Wake 2018       | Treatment patterns in hyperlipidaemia patients based on administrative claim databases in Japan                                                                                                                    | Others    | JMDC and MDV                                                                                                           | Nationwide   |                                         | 2014 | 2015 | Medical treatment status                  | Patient health service utilization        | Endocrine, nutritional and metabolic diseases |                                                              | hyperlipidaemia (ICD-10: E78)                        | Others   | aged ≥18 years         |
| Umeda 2018      | Low-Density Lipoprotein Cholesterol Goal Attainment Rates by Initial Statin Monotherapy Among Patients With Dyslipidemia and High Cardiovascular Risk in Japan - A Retrospective Database Analysis                 | MDV       |                                                                                                                        | Nationwide   |                                         | 2012 | 2016 | Medical treatment status                  | Quality of care                           | Endocrine, nutritional and metabolic diseases | Diseases of the circulatory system                           | Dyslipidemia and High Cardiovascular Risk            | Others   | aged ≥20 years         |
| Ito 2020        | Prevalence of gout and asymptomatic hyperuricemia in the pediatric population: a cross-sectional study of a Japanese health insurance database                                                                     | JMDC      |                                                                                                                        | Nationwide   |                                         | 2016 | 2017 | Clinical epidemiology, course of diseases | Medical treatment status                  | Endocrine, nutritional and metabolic diseases | Diseases of the musculoskeletal system and connective tissue | gout and asymptomatic hyperuricemia                  | Children | 0-18 years of age      |

|                                                                  |                                                                                                                                                                                                                                            |           |                                                                                           |              |                                                 |      |      |                                           |                                           |                                                     |                                                              |                                                                     |          |                          |
|------------------------------------------------------------------|--------------------------------------------------------------------------------------------------------------------------------------------------------------------------------------------------------------------------------------------|-----------|-------------------------------------------------------------------------------------------|--------------|-------------------------------------------------|------|------|-------------------------------------------|-------------------------------------------|-----------------------------------------------------|--------------------------------------------------------------|---------------------------------------------------------------------|----------|--------------------------|
| Koto 2020                                                        | Real-world treatment of gout and asymptomatic hyperuricemia: A cross-sectional study of Japanese health insurance claims data                                                                                                              | JMDC      |                                                                                           | Nationwide   |                                                 | 2016 | 2017 | Clinical epidemiology, course of diseases | Medical treatment status                  | Endocrine, nutritional and metabolic diseases       | Diseases of the musculoskeletal system and connective tissue | gout and asymptomatic hyperuricemia                                 | Others   | Age 18-65 years          |
| Hakoda 2019                                                      | Increasing trend of asymptomatic hyperuricemia under treatment with urate-lowering drugs in Japan                                                                                                                                          | JMDC      |                                                                                           | Nationwide   |                                                 | 2010 | 2014 | Clinical epidemiology, course of diseases |                                           | Endocrine, nutritional and metabolic diseases       | Diseases of the musculoskeletal system and connective tissue | gout and asymptomatic hyperuricemia                                 |          |                          |
| Teramoto 2018                                                    | Treatment Patterns and Lipid Profile in Patients with Familial Hypercholesterolemia in Japan                                                                                                                                               | MDV       |                                                                                           | Nationwide   |                                                 | 2013 | 2013 | Medical treatment status                  |                                           | Endocrine, nutritional and metabolic diseases       |                                                              | familial hypercholesterolemia                                       | Others   | aged ≥20 years           |
| Sako 2017                                                        | Hospitalization with hypoglycemia in patients without diabetes mellitus: A retrospective study using a national inpatient database in Japan, 2008-2012                                                                                     | DPC       |                                                                                           | Nationwide   |                                                 | 2008 | 2013 | Clinical epidemiology, course of diseases |                                           | Endocrine, nutritional and metabolic diseases       |                                                              | hypoglycemia                                                        | Others   | aged ≥15 years           |
| Kanda 2020                                                       | Clinical and Economic Burden of Hyperkalemia: A Nationwide Hospital-Based Cohort Study in Japan                                                                                                                                            | MDV       |                                                                                           | Nationwide   |                                                 | 2008 | 2018 | Clinical epidemiology, course of diseases | Health economics                          | Endocrine, nutritional and metabolic diseases       |                                                              | hyperkalemia                                                        | Others   | aged ≥18 years           |
| Kashihara 2019                                                   | Hyperkalemia in Real-World Patients Under Continuous Medical Care in Japan                                                                                                                                                                 | MDV       |                                                                                           | Nationwide   |                                                 | 2008 | 2017 | Clinical epidemiology, course of diseases | Medical treatment status                  | Endocrine, nutritional and metabolic diseases       |                                                              | hyperkalemia                                                        | Others   | aged ≥18 years           |
| Higa 2020                                                        | A Retrospective, Cross-Sectional Study on the Prevalence of Hyperuricemia Using a Japanese Healthcare Database                                                                                                                             | Others    | MinaCare                                                                                  | Nationwide   |                                                 | 2010 | 2014 | Clinical epidemiology, course of diseases |                                           | Endocrine, nutritional and metabolic diseases       |                                                              | Hyperuricemia                                                       |          |                          |
| Tsujimura 2014                                                   | Predictors of hyperglycaemic individuals who do not follow up with physicians after screening in Japan: a cohort study                                                                                                                     | JMDC      |                                                                                           | Nationwide   |                                                 | 2005 | 2010 | Patient health service utilization        | Clinical epidemiology, course of diseases | Endocrine, nutritional and metabolic diseases       |                                                              | hyperglycaemic                                                      | Others   | aged 20 to 68 years      |
| Tatebe 2020                                                      | Hypoglycemia associated with pivalate-conjugated antibiotics in young children: A retrospective study using a medical and pharmacy claims database in Japan                                                                                | JMDC      |                                                                                           | Nationwide   |                                                 | 2011 | 2013 | Intervention effect                       |                                           | Endocrine, nutritional and metabolic diseases       |                                                              | Hypoglycemia (PCA-induced hypoglycemia)                             | Children | 1month-5year of age      |
| Hakoda 2013                                                      | [A cause for age-dependent differences in the frequency of hyperuricemia—An analysis utilizing a database of health insurance claims]                                                                                                      | JMDC      |                                                                                           | Nationwide   |                                                 | 2008 | 2008 | Clinical epidemiology, course of diseases |                                           | Endocrine, nutritional and metabolic diseases       |                                                              | hyperuricemia                                                       | Others   | aged ≥20 years           |
| Momo 2019                                                        | Risk factors affecting the failed low-density lipoprotein level achievement rate in working-age male population at high cardiovascular risk                                                                                                | JMDC      |                                                                                           | Nationwide   |                                                 | 2004 | 2016 | Medical treatment status                  | Patient health service utilization        | Endocrine, nutritional and metabolic diseases       |                                                              | low-density lipoprotein (LDL)                                       | Others   | aged 18-60 years         |
| Ibayashi 2020                                                    | [A descriptive study of mitochondrial diseases using DPC data]*                                                                                                                                                                            | DPC       | DPC Research Institute                                                                    | Nationwide   |                                                 | 2014 | 2015 | Clinical epidemiology, course of diseases |                                           | Endocrine, nutritional and metabolic diseases       | Diseases of the nervous system                               | mitochondrial disease                                               |          | age group                |
| Nishikawa 2020                                                   | Combined Associations of Body Mass Index and Metabolic Health Status on Medical and Dental Care Days and Costs in Japanese Male Employees: A 4-Year Follow-Up Study                                                                        | Others    | health insurance claims data: the Kobe Steel Health Insurance Association                 | Nationwide   |                                                 | 2010 | 2013 | Health economics                          |                                           | Endocrine, nutritional and metabolic diseases       |                                                              | body mass index (BMI) levels and metabolic dysfunction              |          |                          |
| Okamoto 2013                                                     | Effects of health guidance on outpatient and pharmacy expenditures: a disease- and drug-specific 3-year observational study using propensity-score matching                                                                                | Others    | a health insurance society                                                                | Others       | a health insurance society in the manufacturing | 2008 | 2012 | Health economics                          | Intervention effect                       | Endocrine, nutritional and metabolic diseases       |                                                              | metabolic syndrome                                                  | Others   | age ≥40 years            |
| Funayama 2016                                                    | [(How are the effects of long-term care prevention and health guidance evaluated?) The relationship between waist circumference and average annual medical expenses using specific health checkup results and claim data]*                 | JHIA      |                                                                                           | Municipality | Yokohama city                                   | 2012 | 2013 | Health economics                          |                                           | Endocrine, nutritional and metabolic diseases       |                                                              | abdominal circumference                                             | Others   | 35-74 years old          |
| Okamoto 2013                                                     | [Evaluation of the health check up and guidance program through linkage with health insurance claims]                                                                                                                                      | NHI/LSEHS | National Health Insurance, Health Care System for the Late Elderly                        | Municipality | Mishima City                                    | 2008 | 2012 | Intervention effect                       |                                           | Endocrine, nutritional and metabolic diseases       |                                                              | metabolic syndrome                                                  | Others   | aged 40 to 74            |
| Hurst 2018                                                       | Effects of changes in eating speed on obesity in patients with diabetes: a secondary analysis of longitudinal health check-up data                                                                                                         | JMDC      |                                                                                           | Nationwide   |                                                 | 2008 | 2013 | Clinical epidemiology, course of diseases |                                           | Endocrine, nutritional and metabolic diseases       |                                                              | obesity                                                             |          |                          |
| Takeuchi 2010                                                    | [Relationship between community-based dental health programs and health care costs for the metabolic syndrome]                                                                                                                             | NHI/LSEHS | NHI                                                                                       | Prefecture   | Okayama                                         | 1997 | 2007 | Health economics                          | Health policy evaluation and utilization  | Endocrine, nutritional and metabolic diseases       |                                                              | metabolic syndrome                                                  | Others   | age ≥40 years            |
| Fujita 2018                                                      | Medical costs attributable to overweight and obesity in Japanese individuals                                                                                                                                                               | NHI/LSEHS | NHI                                                                                       | Municipality | Chiba City                                      | 2012 | 2016 | Health economics                          |                                           | Endocrine, nutritional and metabolic diseases       |                                                              | overweight and obesity                                              | Others   | aged 40-69 years         |
| Sairenchi 2017                                                   | Impact and attribute of each obesity-related cardiovascular risk factor in combination with abdominal obesity on total health expenditures in adult Japanese National Health Insurance beneficiaries: The Ibaraki Prefectural health study | NHI/LSEHS | NHI                                                                                       | Prefecture   | Ibaraki                                         | 2009 | 2013 | Health economics                          |                                           | Endocrine, nutritional and metabolic diseases       | Diseases of the circulatory system                           | abdominal obesity, cardiovascular risk                              | Others   | aged 40-75 years         |
| Itoh 2021                                                        | Metabolically Healthy Obesity and the Risk of Cardiovascular Disease in the General Population - Analysis of a Nationwide Epidemiological Database                                                                                         | JMDC      |                                                                                           | Nationwide   |                                                 | 2005 | 2018 | Clinical epidemiology, course of diseases |                                           | Endocrine, nutritional and metabolic diseases       | Diseases of the circulatory system                           | metabolic disorders, cardiovascular disease                         | Others   | aged ≥20 years           |
| Hattori 2020                                                     | Pituitary surgery's epidemiology using a national inpatient database in Japan                                                                                                                                                              | DPC       |                                                                                           | Nationwide   |                                                 | 2010 | 2016 | Medical treatment status                  | Intervention effect                       | Endocrine, nutritional and metabolic diseases       | Others                                                       | pituitary surgery                                                   |          | age group                |
| Senda 2020                                                       | Early administration of glucocorticoid for thyroid storm: analysis of a national administrative database                                                                                                                                   | DPC       |                                                                                           | Nationwide   |                                                 | 2013 | 2017 | Intervention effect                       |                                           | Endocrine, nutritional and metabolic diseases       |                                                              | thyroid storm                                                       | Others   | age ≥16 years            |
| Sasabuchi 2020                                                   | A survey on total parenteral nutrition in 55,000 hospitalized patients: Retrospective cohort study using a medical claims database                                                                                                         | MDV       |                                                                                           | Nationwide   |                                                 | 2009 | 2018 | Clinical epidemiology, course of diseases |                                           | Endocrine, nutritional and metabolic diseases       | Others                                                       | underfeeding, total parenteral nutrition                            | Others   | aged ≥18 years           |
| Ogawa 2019                                                       | Malnutrition-Related Health Care Cost in Japan: An Analysis of Health Insurance Claims Data                                                                                                                                                | NHI/LSEHS | the community based health insurance and the Medical Care System for the Advanced Elderly | Nationwide   | several municipalities throughout Japan         | 2013 | 2016 | Clinical epidemiology, course of diseases | Health economics                          | Endocrine, nutritional and metabolic diseases       | Others                                                       | strictly diagnosed malnutrition and disease-associated malnutrition |          | all ages                 |
| Itoh 2017                                                        | Vitamin D-Deficient Rickets in Japan                                                                                                                                                                                                       | JMDC      |                                                                                           | Nationwide   |                                                 | 2005 | 2014 | Clinical epidemiology, course of diseases |                                           | Endocrine, nutritional and metabolic diseases       |                                                              | vitamin D deficiency or vitamin D-deficient rickets                 | Children | aged 0 to 15 years       |
| 5) Mental, Behavioral and Neurodevelopmental disorders (F00-F99) |                                                                                                                                                                                                                                            |           |                                                                                           |              |                                                 |      |      |                                           |                                           |                                                     |                                                              |                                                                     |          |                          |
| Obara 2015                                                       | Prescription of drugs for children with attention-deficit/hyperactivity disorder(ADHD) in Japan: a study based on health insurance claims data                                                                                             | JMDC      |                                                                                           | Nationwide   |                                                 | 2005 | 2010 | Medical treatment status                  | Health policy evaluation and utilization  | Mental, Behavioral and Neurodevelopmental disorders |                                                              | attention deficit hyperactivity disorder (ADHD)                     | Children | aged 2 to 17 years       |
| Yoshida 2020                                                     | Drug Prescriptions for Children With ADHD in Japan: A Study Based on Health Insurance Claims Data Between 2005 and 2015                                                                                                                    | JMDC      |                                                                                           | Nationwide   |                                                 | 2005 | 2015 | Medical treatment status                  |                                           | Mental, Behavioral and Neurodevelopmental disorders |                                                              | ADHD (ICD-10 code: F900)                                            | Children | aged 1 to 17 years       |
| Imagawa 2018                                                     | Treatment patterns, health care resource utilization, and costs in Japanese adults with attention-deficit hyperactivity disorder treated with atomoxetine                                                                                  | JMDC      |                                                                                           | Nationwide   |                                                 | 2012 | 2015 | Medical treatment status                  | Health economics                          | Mental, Behavioral and Neurodevelopmental disorders |                                                              | attention-deficit/hyperactivity disorder (ADHD)                     | Others   | at least 18 years of age |
| Nakamura 2013                                                    | Body mass index and in-hospital mortality in anorexia nervosa: data from the Japanese Diagnosis Procedure Combination database                                                                                                             | DPC       |                                                                                           | Nationwide   |                                                 | 2010 | 2010 | Clinical epidemiology, course of diseases |                                           | Mental, Behavioral and Neurodevelopmental disorders |                                                              | anorexia nervosa                                                    |          |                          |

|                      |                                                                                                                                                                                           |           |                                                                                                |              |                                                        |      |      |                                           |                                          |                                                     |                                                                      |                                                                              |               |                                                                      |
|----------------------|-------------------------------------------------------------------------------------------------------------------------------------------------------------------------------------------|-----------|------------------------------------------------------------------------------------------------|--------------|--------------------------------------------------------|------|------|-------------------------------------------|------------------------------------------|-----------------------------------------------------|----------------------------------------------------------------------|------------------------------------------------------------------------------|---------------|----------------------------------------------------------------------|
| Yamamoto-Sasaki 2020 | Association between antidepressant use during pregnancy and congenital anomalies in children: A retrospective cohort study based on Japanese claims data                                  | JMDC      |                                                                                                | Nationwide   |                                                        | 2005 | 2014 | Intervention effect                       |                                          | Mental, Behavioral and Neurodevelopmental disorders | Congenital malformations, deformations and chromosomal abnormalities | congenital anomaly, antidepressants                                          |               |                                                                      |
| Yamamoto-Sasaki 2019 | Association between antidepressant use during pregnancy and autism spectrum disorder in children: a retrospective cohort study based on Japanese claims data                              | JMDC      |                                                                                                | Nationwide   |                                                        | 2005 | 2014 | Intervention effect                       |                                          | Mental, Behavioral and Neurodevelopmental disorders | Pregnancy, childbirth and the puerperium                             | antidepressant use during pregnancy and autism spectrum disorder in children |               |                                                                      |
| Ishikawa 2020        | Antidepressant prescriptions for prenatal and postpartum women in Japan: A health administrative database study                                                                           | JMDC      |                                                                                                | Nationwide   |                                                        | 2005 | 2016 | Medical treatment status                  |                                          | Mental, Behavioral and Neurodevelopmental disorders | Pregnancy, childbirth and the puerperium                             | antidepressant prescriptions to prenatal and postpartum women                |               |                                                                      |
| Ogino 2020           | Impact of class-level labelling change on prescriptions of antidepressants for adolescents: An interrupted time-series study using a health insurance claims database in Japan, 2005-2013 | JMDC      | Vital Statistics records                                                                       | Nationwide   |                                                        | 2005 | 2013 | Health policy evaluation and utilization  |                                          | Mental, Behavioral and Neurodevelopmental disorders | Others                                                               | antidepressants, suicide                                                     | Others        | aged 10 to 24 years (target population)                              |
| Su 2020              | Incidence, prevalence and prescription patterns of antipsychotic medications use in Asia and US: A cross-nation comparison with common data model                                         | JMDC      |                                                                                                | Nationwide   | Taiwan, Hong Kong, Japan, and the United States        | 2007 | 2014 | Medical treatment status                  | Socioeconomic comparison                 | Mental, Behavioral and Neurodevelopmental disorders |                                                                      | antipsychotic medications use                                                | Others        | age<65                                                               |
| Kochi 2017           | Trends in antipsychotic prescriptions for Japanese outpatients during 2006-2012: a descriptive epidemiological study                                                                      | Others    | claims data from 1038 community pharmacies                                                     | Nationwide   |                                                        | 2006 | 2012 | Medical treatment status                  |                                          | Mental, Behavioral and Neurodevelopmental disorders |                                                                      | antipsychotic prescriptions                                                  | Others        | 18-64 years old, ≥65 years old                                       |
| Kuroda 2019          | Antipsychotic use and related factors among people with dementia aged 75 years or older in Japan: A comprehensive population-based estimation using medical and long-term care data       | NHI/LSEHS | medical and LTC data                                                                           | Municipality | a middle-sized suburban city in the Tokyo metropolitan | 2012 | 2013 | Medical treatment status                  |                                          | Mental, Behavioral and Neurodevelopmental disorders | Diseases of the nervous system                                       | antipsychotics among older adults with dementia                              | Older persons | over 75 years (65 to 74 years)                                       |
| Okumura 2018         | Glucose and Prolactin Monitoring in Children and Adolescents Initiating Antipsychotic Therapy                                                                                             | NDB       |                                                                                                | Nationwide   |                                                        | 2014 | 2015 | Medical treatment status                  |                                          | Mental, Behavioral and Neurodevelopmental disorders | Endocrine, nutritional and metabolic diseases                        | antipsychotics, diabetes                                                     | Children      | aged ≤18 years                                                       |
| Takeuchi 2015        | Atypical Antipsychotics and the Risk of Hyperlipidemia: A Sequence Symmetry Analysis                                                                                                      | JMDC      |                                                                                                | Nationwide   |                                                        | 2005 | 2013 | Intervention effect                       |                                          | Mental, Behavioral and Neurodevelopmental disorders | Endocrine, nutritional and metabolic diseases                        | atypical antipsychotic medication, hyperlipidemia                            |               |                                                                      |
| Takahashi 2020       | Factors associated with high-dose antipsychotic prescriptions in outpatients with schizophrenia: An analysis of claims data from a Japanese prefecture                                    | NHI/LSEHS | National Health Insurance and Long Life Medical Care System                                    | Prefecture   | a single prefecture                                    | 2014 | 2015 | Medical treatment status                  |                                          | Mental, Behavioral and Neurodevelopmental disorders |                                                                      | high-dose antipsychotic prescriptions in outpatients with schizophrenia      | Others        | aged 18 years and older                                              |
| Qiu 2018             | Antipsychotic polypharmacy in the treatment of schizophrenia in China and Japan                                                                                                           | JMDC      |                                                                                                | Nationwide   | China and Japan                                        | 2010 | 2014 | Medical treatment status                  | Socioeconomic comparison                 | Mental, Behavioral and Neurodevelopmental disorders |                                                                      | schizophrenia (antipsychotic polypharmacy)                                   |               |                                                                      |
| Yokoyama 2020        | Association Between Antipsychotics and Osteoporosis Based on Real-World Data                                                                                                              | JMDC      | FAERS                                                                                          | Nationwide   |                                                        | 2005 | 2017 | Intervention effect                       |                                          | Mental, Behavioral and Neurodevelopmental disorders | Diseases of the musculoskeletal system and connective tissue         | antipsychotic use and onset of osteoporosis                                  |               |                                                                      |
| Inoue 2021           | Real-World Treatment Patterns and Adherence to Oral Medication Among Patients with Bipolar Disorders: A Retrospective, Observational Study Using a Healthcare Claims Database             | JMDC      |                                                                                                | Nationwide   |                                                        | 2013 | 2018 | Medical treatment status                  | Patient health service utilization       | Mental, Behavioral and Neurodevelopmental disorders |                                                                      | bipolar disorder (F30 or 31)                                                 |               |                                                                      |
| Shinjo 2019          | Risk factors for early unplanned readmission in patients with bipolar disorder: A retrospective observational study                                                                       | DPC       |                                                                                                | Nationwide   |                                                        | 2012 | 2014 | Medical treatment status                  | Health policy evaluation and utilization | Mental, Behavioral and Neurodevelopmental disorders |                                                                      | bipolar patients (ICD-10; F31)                                               | Others        | aged ≥15 years                                                       |
| Ning 2014            | [The length of stay for hospitalized patients with dementia in Fukuoka Prefecture : A cross-sectional study]                                                                              | NHI/LSEHS | Fukuoka National Health Insurance Organization                                                 | Prefecture   | Fukuoka                                                | 2009 | 2010 | Medical treatment status                  | Health policy evaluation and utilization | Mental, Behavioral and Neurodevelopmental disorders | Diseases of the nervous system                                       | dementia                                                                     |               |                                                                      |
| Morioka 2021         | Dementia and patient outcomes after hip surgery in older patients: A retrospective observational study using nationwide administrative data in Japan                                      | DPC       | Diagnosis Procedure Combination database and reports of the medical functions of hospital beds | Nationwide   |                                                        | 2016 | 2017 | Clinical epidemiology, course of diseases |                                          | Mental, Behavioral and Neurodevelopmental disorders | Diseases of the nervous system                                       | Dementia (after hip surgery)                                                 | Older persons | aged 65 or older                                                     |
| Nakaoku 2021         | Predictors of New Dementia Diagnoses in Elderly Individuals: A Retrospective Cohort Study Based on Prefecture-Wide Claims Data in Japan                                                   | NHI/LSEHS | administrative claims database of the medical care system for the elderly                      | Prefecture   | Niigata                                                | 2012 | 2016 | Clinical epidemiology, course of diseases |                                          | Mental, Behavioral and Neurodevelopmental disorders | Diseases of the nervous system                                       | dementia                                                                     | Older persons | aged ≥75 years                                                       |
| Morioka 2020         | Structure and process of dementia care and patient outcomes after hip surgery in elderly people with dementia: A retrospective observational study in Japan                               | DPC       |                                                                                                | Nationwide   |                                                        | 2016 | 2017 | Health policy evaluation and utilization  |                                          | Mental, Behavioral and Neurodevelopmental disorders | Diseases of the nervous system                                       | dementia (underwent hip surgeries)                                           | Older persons | aged 65 years or older                                               |
| Tashiro 2020         | [Regional differences in dementia seen from health insurance claims data: A study on all old-old people in Niigata Prefecture]*                                                           | NHI/LSEHS |                                                                                                | Prefecture   | Niigata                                                | 2012 | 2016 | Health economics                          | Socioeconomic comparison                 | Mental, Behavioral and Neurodevelopmental disorders | Diseases of the nervous system                                       | dementia                                                                     | Older persons | 75 years old and older                                               |
| Maeda 2018           | Surveillance of First-Generation H1-Antihistamine Use for Older Patients with Dementia in Japan: A Retrospective Cohort Study                                                             | NHI/LSEHS | Fukuoka Late Elders' Health Insurance                                                          | Prefecture   | Fukuoka                                                | 2010 | 2013 | Medical treatment status                  |                                          | Mental, Behavioral and Neurodevelopmental disorders |                                                                      | dementia                                                                     | Older persons | aged 75 years or older                                               |
| Maeda 2018           | Effects of gastrostomy fee schedule revision on artificial nutrition routes among older people with dementia in Japan: A time series observational study                                  | NHI/LSEHS | Fukuoka Late Elders' Health Insurance                                                          | Prefecture   | Fukuoka                                                | 2010 | 2016 | Medical treatment status                  | Health policy evaluation and utilization | Mental, Behavioral and Neurodevelopmental disorders |                                                                      | dementia                                                                     | Older persons | aged ≥75 years and those aged 65-74 years with a specific disability |
| Sakata 2018          | Thyroid function tests before prescribing anti-dementia drugs: a retrospective observational study                                                                                        | NDB       |                                                                                                | Nationwide   |                                                        | 2015 | 2016 | Medical treatment status                  | Quality of care                          | Mental, Behavioral and Neurodevelopmental disorders | Diseases of the nervous system                                       | dementia                                                                     | Older persons | aged ≥65 years                                                       |
| Lin 2015             | The effects of dementia and long-term care services on the deterioration of care-needs levels of the elderly in Japan                                                                     | NHI/LSEHS | National Healthcare Insurance Database and Old-Old Adults Medical Care Program Database        | Prefecture   | Kyoto                                                  | 2010 | 2011 | Clinical epidemiology, course of diseases | Health policy evaluation and utilization | Mental, Behavioral and Neurodevelopmental disorders | Diseases of the nervous system                                       | dementia                                                                     | Older persons | aged 65 years and above                                              |
| Sakata 2017          | Job Loss After Diagnosis of Early-Onset Dementia: A Matched Cohort Study                                                                                                                  | JMDC      |                                                                                                | Nationwide   |                                                        | 2013 | 2015 |                                           | Others                                   | Mental, Behavioral and Neurodevelopmental disorders | Diseases of the nervous system                                       | Early-onset dementia                                                         | Others        | aged 40-59 years                                                     |

|                 |                                                                                                                                                                                                                 |           |                                                                                                                                          |              |                                    |      |      |                                           |                                           |                                                     |                                                                     |                                                            |               |                              |
|-----------------|-----------------------------------------------------------------------------------------------------------------------------------------------------------------------------------------------------------------|-----------|------------------------------------------------------------------------------------------------------------------------------------------|--------------|------------------------------------|------|------|-------------------------------------------|-------------------------------------------|-----------------------------------------------------|---------------------------------------------------------------------|------------------------------------------------------------|---------------|------------------------------|
| Mine 2020       | Hospitalization and discharge routes of elderly hip fracture patients with and without dementia: a nationwide cross-sectional exploratory study using the Japanese Diagnostic Procedure Combination database    | DPC       |                                                                                                                                          | Nationwide   |                                    | 2014 | 2016 | Clinical epidemiology, course of diseases |                                           | Mental, Behavioral and Neurodevelopmental disorders | Injury, poisoning and certain other consequences of external causes | hip fracture, dementia                                     | Older persons | aged 65 years or older       |
| Tomioaka 2020   | An analysis of equity in treatment of hip fractures for older patients with dementia in acute care hospitals: observational study using nationwide hospital claims data in Japan                                | DPC       |                                                                                                                                          | Nationwide   |                                    | 2014 | 2018 | Medical treatment status                  |                                           | Mental, Behavioral and Neurodevelopmental disorders | Injury, poisoning and certain other consequences of external causes | hip fracture, dementia                                     | Older persons | 65 years old and older       |
| Tsuda 2015      | Association between dementia and postoperative complications after hip fracture surgery in the elderly: analysis of 87,654 patients using a national administrative database                                    | DPC       |                                                                                                                                          | Nationwide   |                                    | 2007 | 2010 | Clinical epidemiology, course of diseases |                                           | Mental, Behavioral and Neurodevelopmental disorders | Injury, poisoning and certain other consequences of external causes | neck fracture and intertrochanteric fracture, dementia     | Others        | age ≥70 years                |
| Maeda 2016      | Investigation into the causes of indwelling urethral catheter implementation and its effects on clinical outcomes and health care resources among dementia patients with pneumonia A retrospective cohort study | NHI/LSEHS | Fukuoka Late Elders' Health Insurance                                                                                                    | Prefecture   | Fukuoka                            | 2010 | 2013 | Quality of care                           | Health economics                          | Mental, Behavioral and Neurodevelopmental disorders | Diseases of the respiratory system                                  | dementia patients with pneumonia                           | Older persons | 75 years or older            |
| Song 2017       | Association between eicosapentaenoic acid (EPA) medication intake and new onset of depression among Japanese patients with hyperlipidemia: A 3-year follow-up study                                             | JMDC      |                                                                                                                                          | Nationwide   |                                    | 2005 | 2014 | Intervention effect                       |                                           | Mental, Behavioral and Neurodevelopmental disorders | Endocrine, nutritional and metabolic diseases                       | depression, hyperlipidemia                                 | Others        | aged ≥18 years               |
| Inada 2021      | Effect of residual insomnia and use of hypnotics on relapse of depression: a retrospective cohort study using a health insurance claims database                                                                | JMDC      |                                                                                                                                          | Nationwide   |                                    | 2006 | 2017 | Clinical epidemiology, course of diseases | Medical treatment status                  | Mental, Behavioral and Neurodevelopmental disorders |                                                                     | residual insomnia, relapse of depression                   | Others        | aged 20-65 years             |
| Yamato 2021     | Patterns of hypnotic prescribing for residual insomnia and recurrence of major depressive disorder: a retrospective cohort study using a Japanese health insurance claims database                              | JMDC      |                                                                                                                                          | Nationwide   |                                    | 2005 | 2018 | Intervention effect                       | Medical treatment status                  | Mental, Behavioral and Neurodevelopmental disorders |                                                                     | residual insomnia, recurrence of major depressive disorder | Others        | 20-56 years                  |
| Fujita 2019     | Risk of depressive disorders after tobacco smoking cessation: a retrospective cohort study in Fukuoka, Japan                                                                                                    | JHIA      | The Fukuoka branch of the Japan Health Insurance Association                                                                             | Prefecture   | Fukuoka                            | 2010 | 2014 | Clinical epidemiology, course of diseases |                                           | Mental, Behavioral and Neurodevelopmental disorders |                                                                     | depressive disorders                                       | Others        | 30-69 years old              |
| Hirano 2018     | Possibility of Database Research as a Means of Pharmacovigilance in Japan Based on a Comparison with Sertraline Postmarketing Surveillance                                                                      | Others    | MinaCare, postmarketing surveillance results                                                                                             | Nationwide   |                                    | 2008 | 2013 | Health policy evaluation and utilization  | Research methodology                      | Mental, Behavioral and Neurodevelopmental disorders |                                                                     | depression/depressive symptoms and panic disorder          |               |                              |
| Kimura 2015     | Treatment persistence with antidepressants in Japan: Assessment of the first 60 days of treatment based on pharmacy claims data from reimbursement database                                                     | Others    | JMIRI database                                                                                                                           | Nationwide   |                                    | 2012 | 2012 | Patient health service utilization        |                                           | Mental, Behavioral and Neurodevelopmental disorders |                                                                     | depression                                                 | Others        | aged ≥20 years               |
| Kitanishi 2021  | Patient journey through cases of depression from claims database using machine learning algorithms                                                                                                              | JMDC      |                                                                                                                                          | Nationwide   |                                    | 2005 | 2018 | Prediction model                          | Clinical epidemiology, course of diseases | Mental, Behavioral and Neurodevelopmental disorders |                                                                     | depression                                                 |               |                              |
| Yamazaki 2021   | Early Electroconvulsive Therapy in Patients With Major Depressive Disorder: A Propensity Score-Matched Analysis Using a Nationwide Inpatient Database in Japan                                                  | DPC       |                                                                                                                                          | Nationwide   |                                    | 2011 | 2018 | Intervention effect                       | Health economics                          | Mental, Behavioral and Neurodevelopmental disorders |                                                                     | major depressive disorder                                  |               |                              |
| Mahlich 2018    | Estimating Prevalence and Healthcare Utilization for Treatment-Resistant Depression in Japan: A Retrospective Claims Database Study                                                                             | JMDC      |                                                                                                                                          | Nationwide   |                                    | 2012 | 2015 | Clinical epidemiology, course of diseases | Health economics                          | Mental, Behavioral and Neurodevelopmental disorders |                                                                     | treatment-resistant depression                             | Others        | 18-60 years of age           |
| Furukawa 2013   | Prescription patterns following first-line new generation antidepressants for depression in Japan: a naturalistic cohort study based on a large claims database                                                 | JMDC      |                                                                                                                                          | Nationwide   |                                    | 2008 | 2011 | Medical treatment status                  | Quality of care                           | Mental, Behavioral and Neurodevelopmental disorders |                                                                     | unipolar depression                                        | Others        | Aged 18 or older             |
| Onishi 2013     | Psychotropic prescription patterns among patients diagnosed with depressive disorder based on claims database in Japan                                                                                          | JMDC      |                                                                                                                                          | Nationwide   |                                    | 2008 | 2011 | Medical treatment status                  | Quality of care                           | Mental, Behavioral and Neurodevelopmental disorders |                                                                     | depressive disorder                                        | Others        | age ≥18 years                |
| Otsubo 2012     | [A fact-finding survey on pain comorbidity in patients with depression: A retrospective study using a medical fee claims database]*                                                                             | MDV       |                                                                                                                                          | Nationwide   |                                    | 2003 | 2010 | Clinical epidemiology, course of diseases | Medical treatment status                  | Mental, Behavioral and Neurodevelopmental disorders | Others                                                              | Depression, Pain                                           | Others        | age ≥20 years                |
| Michihata 2014  | Comparison between enteral nutrition and intravenous hyperalimentation in patients with eating disorders: results from the Japanese diagnosis procedure combination database                                    | DPC       |                                                                                                                                          | Nationwide   |                                    | 2010 | 2013 | Intervention effect                       |                                           | Mental, Behavioral and Neurodevelopmental disorders |                                                                     | Eating disorders                                           | Others        | aged 10-59 years             |
| Hosomi 2016     | [Association of Antipsychotic Use with Extrapyramidal Symptoms: Data Mining of the Japanese National Insurance Claims Database]                                                                                 | NDB       |                                                                                                                                          | Nationwide   |                                    | 2010 | 2012 | Intervention effect                       |                                           | Mental, Behavioral and Neurodevelopmental disorders | Diseases of the nervous system                                      | Extrapyramidal Symptoms (Antipsychotic Use)                |               |                              |
| Hayashi 2020    | How was cognitive behavioural therapy for mood disorder implemented in Japan? A retrospective observational study using the nationwide claims database from FY2010 to FY2015                                    | NDB       | Aggregated data                                                                                                                          | Nationwide   |                                    | 2010 | 2015 | Medical treatment status                  |                                           | Mental, Behavioral and Neurodevelopmental disorders |                                                                     | mood disorder                                              |               |                              |
| Fujita 2019     | Inequality within a community at the neighborhood level and the incidence of mood disorders in Japan: a multilevel analysis                                                                                     | NHI/LSEHS | NHI                                                                                                                                      | Municipality | Chiba City                         | 2013 | 2016 | Clinical epidemiology, course of diseases | Socioeconomic comparison                  | Mental, Behavioral and Neurodevelopmental disorders |                                                                     | mood disorder (F30-F39)                                    | Others        | aged 20 to 69 years          |
| Sakakibara 2019 | [Study on the Risk Factors for Postoperative Delirium Using the National Health Insurance Claims Database in Japan]                                                                                             | NDB       |                                                                                                                                          | Nationwide   |                                    | 2015 | 2016 | Clinical epidemiology, course of diseases |                                           | Mental, Behavioral and Neurodevelopmental disorders |                                                                     | postoperative delirium                                     |               |                              |
| Yamanashi 2020  | The role of mental disease on the association between multimorbidity and medical expenditure                                                                                                                    | NHI/LSEHS | Kokuho-Database System                                                                                                                   | Municipality | Goto city, western Japan           | 2016 | 2017 | Clinical epidemiology, course of diseases | Health economics                          | Mental, Behavioral and Neurodevelopmental disorders | Others                                                              | mental disease, multimorbidity                             | Others        | aged 0-75 years              |
| Satoh 2016      | Prescription trends in children with pervasive developmental disorders: a claims data-based study in Japan                                                                                                      | JMDC      |                                                                                                                                          | Nationwide   |                                    | 2005 | 2010 | Medical treatment status                  |                                           | Mental, Behavioral and Neurodevelopmental disorders |                                                                     | pervasive developmental disorders                          | Children      | younger than 18 years of age |
| Muramatsu 2019  | Relationship between treatment and period of absence among employees on sick leave due to mental disease                                                                                                        | Others    | health insurance claims data provided by one health insurance society, data on accident and sickness benefits paid during the sick leave | Others       | a property insurance company group | 2008 | 2014 | Intervention effect                       |                                           | Mental, Behavioral and Neurodevelopmental disorders |                                                                     | mental disease, psychotherapy                              |               |                              |
| Okumura 2019    | Psychiatric Admissions and Length of Stay During Fiscal Years 2014 and 2015 in Japan: A Retrospective Cohort Study Using a Nationwide Claims Database                                                           | NDB       | 630 survey                                                                                                                               | Nationwide   |                                    | 2014 | 2016 | Medical treatment status                  |                                           | Mental, Behavioral and Neurodevelopmental disorders |                                                                     | psychiatric care                                           |               | age group                    |
| Inada 2018      | Psychogenic non-epileptic seizures in Japan: Trends in prevalence, delay in diagnosis, and frequency of hospital visits                                                                                         | JMDC      |                                                                                                                                          | Nationwide   |                                    | 2006 | 2014 | Clinical epidemiology, course of diseases | Medical treatment status                  | Mental, Behavioral and Neurodevelopmental disorders |                                                                     | Psychogenic non-epileptic seizures                         |               | all ages                     |
| Okumura 2018    | Association of high psychiatrist staffing with prolonged hospitalization, follow-up visits, and readmission in acute psychiatric units: a retrospective cohort study using a nationwide claims database         | NDB       |                                                                                                                                          | Nationwide   |                                    | 2014 | 2016 | Health policy evaluation and utilization  |                                           | Mental, Behavioral and Neurodevelopmental disorders |                                                                     | Patients newly admitted to acute psychiatric units         |               |                              |
| Shinjo 2017     | Factors affecting prolonged length of stay in psychiatric patients in Japan: A retrospective observational study                                                                                                | DPC       |                                                                                                                                          | Nationwide   |                                    | 2012 | 2014 | Clinical epidemiology, course of diseases | Health policy evaluation and utilization  | Mental, Behavioral and Neurodevelopmental disorders |                                                                     | psychiatric patients                                       | Others        | aged ≥15 years               |
| Yamaoka 2017    | [Mental Health of Small and Medium Enterprise Workers: An Empirical Analysis Using Medical Claims Data from Japan Health Insurance Association]                                                                 | JHIA      | Japan Health Insurance Association Hyogo Branch                                                                                          | Prefecture   | Hyogo                              | 2013 | 2013 | Clinical epidemiology, course of diseases |                                           | Mental, Behavioral and Neurodevelopmental disorders |                                                                     | mental disorder                                            |               |                              |



|                 |                                                                                                                                                                                                                   |           |                                                                                                               |                    |      |      |                                           |                                          |                                                     |                                                      |                                                                             |                                                |                                 |                    |
|-----------------|-------------------------------------------------------------------------------------------------------------------------------------------------------------------------------------------------------------------|-----------|---------------------------------------------------------------------------------------------------------------|--------------------|------|------|-------------------------------------------|------------------------------------------|-----------------------------------------------------|------------------------------------------------------|-----------------------------------------------------------------------------|------------------------------------------------|---------------------------------|--------------------|
| Matsuda 2016    | Refinement of DPC classification of psychiatric disorders                                                                                                                                                         | DPC       |                                                                                                               | Nationwide         | 2011 | 2012 | Health economics                          |                                          | Mental, Behavioral and Neurodevelopmental disorders | psychiatric MDC                                      |                                                                             | age category                                   |                                 |                    |
| Murakami 2016   | Importance of psychiatric disorders as comorbidities and complications among the acute in-patient cases in Japan                                                                                                  | DPC       |                                                                                                               | Nationwide         | 2010 | 2010 | Clinical epidemiology, course of diseases |                                          | Mental, Behavioral and Neurodevelopmental disorders | psychiatric problem among the acute in-patient cases |                                                                             |                                                |                                 |                    |
| Murata 2015     | [Analysis of outcomes of acute abdominal patients with mental disorder using Diagnosis Procedure Combination database]                                                                                            | DPC       |                                                                                                               | Nationwide         | 2009 | 2011 | Clinical epidemiology, course of diseases |                                          | Mental, Behavioral and Neurodevelopmental disorders | Others                                               | acute abdomen, psychiatric complications                                    | age group                                      |                                 |                    |
| Inagaki 2014    | [Metabolic and Lithium Monitoring in Japanese Psychiatric Outpatient Clinics]                                                                                                                                     | Others    | health insurance claims of psychiatric outpatients (a database constructed from research on medical policies) | Nationwide         | 2006 | 2006 | Medical treatment status                  | Quality of care                          | Mental, Behavioral and Neurodevelopmental disorders |                                                      | psychiatric outpatient                                                      |                                                |                                 |                    |
| Matsuda 2010    | [Evaluation of Psychiatric medicine under the DPC system]                                                                                                                                                         | DPC       |                                                                                                               | Nationwide         | 2008 | 2008 | Medical treatment status                  | Health economics                         | Mental, Behavioral and Neurodevelopmental disorders | Diseases of the nervous system                       | Psychiatric disorders                                                       |                                                |                                 |                    |
| Baba 2020       | [First-Time Use versus Continuing Use of Benzodiazepine Receptor Agonists in Japan]                                                                                                                               | JMDC      |                                                                                                               | Nationwide         | 2013 | 2014 | Medical treatment status                  |                                          | Mental, Behavioral and Neurodevelopmental disorders |                                                      | Benzodiazepine receptor agonists                                            | Others                                         | aged between 40 and 74          |                    |
| Okumura 2016    | Prevalence, prescribed quantities, and trajectory of multiple prescriber episodes for benzodiazepines: A 2-year cohort study                                                                                      | JMDC      |                                                                                                               | Nationwide         | 2012 | 2014 | Medical treatment status                  |                                          | Mental, Behavioral and Neurodevelopmental disorders |                                                      | patients with a benzodiazepine                                              | Others                                         | aged 0-74 years                 |                    |
| Takekita 2016   | Continuation and discontinuation of benzodiazepine prescriptions: A cohort study based on a large claims database in Japan                                                                                        | JMDC      |                                                                                                               | Nationwide         | 2005 | 2014 | Medical treatment status                  | Patient health service utilization       | Mental, Behavioral and Neurodevelopmental disorders |                                                      | new benzodiazepines users                                                   | Others                                         | Aged 18 or older                |                    |
| Takeuchi 2012   | [Relationship between Implementation of Community-based Dental Health Programs and Health Care Costs for Mental and Behavioral Disorders]                                                                         | NHI/LSEHS | NHI                                                                                                           | Prefecture Okayama | 1997 | 2009 | Health economics                          | Health policy evaluation and utilization | Mental, Behavioral and Neurodevelopmental disorders | Diseases of the digestive system                     | Mental and behavioral disorders, dental                                     | Others                                         | age <75 years                   |                    |
| Shigemitsu 2021 | Suicide attempts during pregnancy and perinatal outcomes                                                                                                                                                          | DPC       |                                                                                                               | Nationwide         | 2016 | 2018 | Clinical epidemiology, course of diseases |                                          | Mental, Behavioral and Neurodevelopmental disorders | Pregnancy, childbirth and the puerperium             | suicide attempts during pregnancy                                           | Others                                         | aged ≥15 years                  |                    |
| Shigemitsu 2020 | Suicide Attempts Among Pregnant and Postpartum Women in Japan: A Nationwide Retrospective Cohort Study                                                                                                            | DPC       |                                                                                                               | Nationwide         | 2016 | 2018 | Clinical epidemiology, course of diseases |                                          | Mental, Behavioral and Neurodevelopmental disorders | Pregnancy, childbirth and the puerperium             | Suicide attempts among pregnant and postpartum women                        | Others                                         | aged ≥13 years                  |                    |
| Asami 2016      | [A Perspective of Pharmacovigilance Using the Healthcare Claim Database, Based on Comparison with Sertraline Post Marketing Surveillance]                                                                         | Others    | MinaCare, Sertraline Post Marketing Surveillance                                                              | Nationwide         | 2008 | 2013 | Research methodology                      | Health policy evaluation and utilization | Mental, Behavioral and Neurodevelopmental disorders |                                                      | Sertraline                                                                  |                                                |                                 |                    |
| Ooba 2018       | Prevalence of Therapeutic Drug Monitoring for Lithium and the Impact of Regulatory Warnings: Analysis Using Japanese Claims Database                                                                              | JMDC      |                                                                                                               | Nationwide         | 2005 | 2014 | Quality of care                           | Health policy evaluation and utilization | Mental, Behavioral and Neurodevelopmental disorders |                                                      | Therapeutic drug monitoring for lithium                                     | Others                                         | aged 20-74 years old            |                    |
| Hirano 2019     | Changes in Prescription of Psychotropic Drugs After Introduction of Polypharmacy Reduction Policy in Japan Based on a Large-Scale Claims Database                                                                 | Others    | MinaCare                                                                                                      | Nationwide         | 2011 | 2017 | Medical treatment status                  | Health policy evaluation and utilization | Mental, Behavioral and Neurodevelopmental disorders |                                                      | psychotropic drug prescribed patients                                       | Others                                         | age<75                          |                    |
| Tanemura 2019   | Pediatric off-label use of psychotropic drugs approved for adult use in Japan in the light of approval information regarding pediatric patients in the United States: a study of a pharmacy prescription database | Others    | database of a company owning a nationwide chain pharmacies                                                    | Nationwide         | 2016 | 2017 | Medical treatment status                  |                                          | Mental, Behavioral and Neurodevelopmental disorders |                                                      | pediatric patients' off-label use of psychotropics approved only for adults | Children                                       | aged <16 years                  |                    |
| Orime 2018      | Survey on the management of physical risks induced by psychotropic agents in Japan                                                                                                                                | JMDC      |                                                                                                               | Nationwide         | 2014 | 2014 | Medical treatment status                  | Quality of care                          | Mental, Behavioral and Neurodevelopmental disorders |                                                      | persistent users of psychotropic agents                                     | Others                                         | aged 6-17 years and 18-74 years |                    |
| Matsuda 2015    | Analysis of Health Care Region for Psychiatric Care Based on the National Database                                                                                                                                | NDB       |                                                                                                               | Prefecture Fukuoka | 2010 | 2010 | Health policy evaluation and utilization  |                                          | Mental, Behavioral and Neurodevelopmental disorders |                                                      | psychiatric medicine                                                        |                                                |                                 |                    |
| Arakawa 2015    | [Actual status of prescription patterns of anxiolytics and hypnotics in outpatients using National Database of Health Insurance Claim Information and Specific Medical Checkups]                                  | NDB       | Sampling data                                                                                                 | Nationwide         | 2011 | 2011 | Medical treatment status                  |                                          | Mental, Behavioral and Neurodevelopmental disorders |                                                      | anxiolytics, hypnotics                                                      |                                                |                                 |                    |
| Okumura 2014    | [Geographical variation in sedative-hypnotic use among recipients of public assistance: a nationwide survey]                                                                                                      | Others    | Fact-finding Survey on Medical Assistance                                                                     | Nationwide         | 2011 | 2012 | Medical treatment status                  | Socioeconomic comparison                 | Mental, Behavioral and Neurodevelopmental disorders |                                                      | sedative-hypnotic use                                                       |                                                |                                 |                    |
| Abe 2012        | Prescription hypnotics and associated background factors in a large-scale Japanese database                                                                                                                       | JMDC      |                                                                                                               | Nationwide         | 2005 | 2005 | Medical treatment status                  |                                          | Mental, Behavioral and Neurodevelopmental disorders |                                                      | prescribed hypnotics                                                        | Others                                         | aged 20 to 74 years             |                    |
| Shimane 2012    | Prevention of overlapping prescriptions of psychotropic drugs by community pharmacists                                                                                                                            | Others    | Saitama Pharmaceutical Association (health insurance claims for dispensing)                                   | Nationwide         | 2010 | 2010 | Medical treatment status                  |                                          | Mental, Behavioral and Neurodevelopmental disorders |                                                      | psychotropic drugs                                                          |                                                |                                 |                    |
| Yatomi 2020     | Prescription patterns of psychotropics in patients receiving synthetic glucocorticoids                                                                                                                            | NDB       | Sampling data                                                                                                 | Nationwide         | 2015 | 2015 | Medical treatment status                  | Intervention effect                      | Mental, Behavioral and Neurodevelopmental disorders | Endocrine, nutritional and metabolic diseases        | psychotropics in patients receiving synthetic glucocorticoids               |                                                | age-groups                      |                    |
| Okumura 2017    | Risk of recurrent overdose associated with prescribing patterns of psychotropic medications after nonfatal overdose                                                                                               | NDB       |                                                                                                               | Nationwide         | 2012 | 2013 |                                           | Intervention effect                      | Medical treatment status                            | Mental, Behavioral and Neurodevelopmental disorders  | Injury, poisoning and certain other consequences of external causes         | overdose (T360-T509), psychotropic medications | Others                          | 19- to 64-year-old |
| Okumura 2015    | Exposure to psychotropic medications prior to overdose: a case-control study                                                                                                                                      | JMDC      |                                                                                                               | Nationwide         | 2012 | 2013 | Medical treatment status                  |                                          | Intervention effect                                 | Mental, Behavioral and Neurodevelopmental disorders  | Injury, poisoning and certain other consequences of external causes         | drug poisoning, psychotropic medications       | Others                          | aged 12-74 years   |
| Inoue 2016      | [Psychotropic Prescribing Practices for Children and Adolescents with Intellectual Disabilities: A Cohort Study Using a Large-scale Health Insurance Database]                                                    | JMDC      |                                                                                                               | Nationwide         | 2012 | 2013 | Medical treatment status                  |                                          | Mental, Behavioral and Neurodevelopmental disorders |                                                      | Intellectual Disabilities, Psychotropic Prescribing Practices               | Children                                       | aged 3-17 years                 |                    |
| Obara 2020      | [Elucidation of the relationship between use of psychotropic drugs in pregnant women and malformation of infants]                                                                                                 | JMDC      |                                                                                                               | Nationwide         | 2005 | 2017 | Medical treatment status                  |                                          | Mental, Behavioral and Neurodevelopmental disorders | Pregnancy, childbirth and the puerperium             | psychotropic drug use in pregnant women                                     |                                                |                                 |                    |
| Cheung 2017     | Drug Utilization of Japanese Patients Diagnosed with Schizophrenia: An Administrative Database Analysis                                                                                                           | MDV       |                                                                                                               | Nationwide         | 2013 | 2015 | Clinical epidemiology, course of diseases | Intervention effect                      | Mental, Behavioral and Neurodevelopmental disorders |                                                      | schizophrenia                                                               | Others                                         | aged between 18 and 65 years    |                    |
| Hata 2020       | The 12-year trend report of antipsychotic usage in a nationwide claims database derived from four million people in Japan                                                                                         | JMDC      |                                                                                                               | Nationwide         | 2005 | 2016 | Medical treatment status                  | Quality of care                          | Mental, Behavioral and Neurodevelopmental disorders |                                                      | schizophrenia                                                               | Others                                         | aged 18 years or older          |                    |
| Iwata 2020      | Treatment Persistence Between Long-Acting Injectable Versus Orally Administered Aripiprazole Among Patients with Schizophrenia in a Real-World Clinical Setting in Japan                                          | JMDC      |                                                                                                               | Nationwide         | 2014 | 2018 | Patient health service utilization        | Medical treatment status                 | Mental, Behavioral and Neurodevelopmental disorders |                                                      | schizophrenia                                                               | Others                                         | aged 18 years or more           |                    |
| Kusumi 2020     | A propensity score matching analysis for cardio metabolic risk of antipsychotics in patients with schizophrenia using Japanese claims data                                                                        | JMDC      |                                                                                                               | Nationwide         | 2005 | 2017 |                                           | Intervention effect                      |                                                     | Mental, Behavioral and Neurodevelopmental disorders  | schizophrenia                                                               | Others                                         | aged ≤65 years                  |                    |
| Takekita 2020   | Rehospitalization Risk of Receptor-Affinity Profile in Antipsychotic Drug Treatment: A Propensity Score Matching Analysis Using a Japanese Employment-Based Health Insurance Database                             | JMDC      |                                                                                                               | Nationwide         | 2005 | 2017 | Medical treatment status                  | Intervention effect                      | Mental, Behavioral and Neurodevelopmental disorders |                                                      | schizophrenia                                                               | Others                                         | aged ≤65 years                  |                    |
| Okumura 2018    | Timely follow-up visits after psychiatric hospitalization and readmission in schizophrenia and bipolar disorder in Japan                                                                                          | NDB       |                                                                                                               | Nationwide         | 2014 | 2015 |                                           | Intervention effect                      | Patient health service utilization                  | Mental, Behavioral and Neurodevelopmental disorders  | schizophrenia or bipolar disorder                                           | Others                                         | aged <65 years                  |                    |

|                                             |                                                                                                                                                                                                                                                |           |                                                                                                                 |              |                                          |      |      |                                           |                                           |                                                     |                                                                          |                                   |                                     |                |
|---------------------------------------------|------------------------------------------------------------------------------------------------------------------------------------------------------------------------------------------------------------------------------------------------|-----------|-----------------------------------------------------------------------------------------------------------------|--------------|------------------------------------------|------|------|-------------------------------------------|-------------------------------------------|-----------------------------------------------------|--------------------------------------------------------------------------|-----------------------------------|-------------------------------------|----------------|
| Toyota 2017                                 | [A study on the effect of psychiatry emergency medical care]                                                                                                                                                                                   | JHIA      | Fukuoka branch of the Japanese Health Insurance Association                                                     | Prefecture   | Fukuoka                                  | 2010 | 2014 | Intervention effect                       | Health policy evaluation and utilization  | Mental, Behavioral and Neurodevelopmental disorders | schizophrenia, psychiatric emergency care                                |                                   |                                     |                |
| Kuwabara 2015                               | Adherence and rehospitalizations in patients with schizophrenia: evidence from Japanese claims data                                                                                                                                            | JMDC      |                                                                                                                 | Nationwide   |                                          | 2009 | 2013 | Intervention effect                       | Patient health service utilization        | Mental, Behavioral and Neurodevelopmental disorders | schizophrenia diagnosis (ICD-10 code: F20)                               | Others                            | aged 18-65 years                    |                |
| Ochiai 2014                                 | [Factors associated with high-dose prescription of antipsychotics in outpatients with schizophrenia -An analysis of claims data from a Japanese prefecture-]                                                                                   | NHI/LSEHS | National Health Insurance and Later-Stage Elderly Healthcare System                                             | Prefecture   | Kyoto                                    | 2011 | 2012 | Medical treatment status                  | Health policy evaluation and utilization  | Mental, Behavioral and Neurodevelopmental disorders | schizophrenia                                                            |                                   |                                     |                |
| Nakamura 2013                               | Length of mechanical restraint following haloperidol injections versus oral atypical antipsychotics for the initial treatment of acute schizophrenia: a propensity-matched analysis from the Japanese diagnosis procedure combination database | DPC       |                                                                                                                 | Nationwide   |                                          | 2006 | 2009 | Intervention effect                       |                                           | Mental, Behavioral and Neurodevelopmental disorders | acute schizophrenia                                                      |                                   |                                     |                |
| Okumura 2013                                | [Antipsychotics prescribing patterns of patients with schizophrenia in Japan : Using the National Database of Health Insurance Claim Information and Specified Medical Checkups]                                                               | NDB       | Sampling data                                                                                                   | Nationwide   |                                          | 2011 | 2011 | Medical treatment status                  | Quality of care                           | Mental, Behavioral and Neurodevelopmental disorders | schizophrenia                                                            |                                   |                                     |                |
| Ye 2012                                     | Antipsychotic monotherapy among outpatients with schizophrenia treated with olanzapine or risperidone in Japan: a health care database analysis                                                                                                | JMDC      |                                                                                                                 | Nationwide   |                                          | 2003 | 2009 | Medical treatment status                  |                                           | Mental, Behavioral and Neurodevelopmental disorders | schizophrenia                                                            | Others                            | between 20 and 65 years old         |                |
| Ye 2011                                     | Characteristics of Outpatients Initiated on Olanzapine versus Risperidone in the Treatment of Schizophrenia in Japan: A Healthcare Database Analysis                                                                                           | JMDC      |                                                                                                                 | Nationwide   |                                          | 2003 | 2009 | Medical treatment status                  |                                           | Mental, Behavioral and Neurodevelopmental disorders | schizophrenia or schizoaffective disorder                                | Others                            | adults aged 20 to 65                |                |
| Iwata 2011                                  | [Comparison between the treatment outcomes of monotherapy with new antipsychotic drugs using medical fee receipts]                                                                                                                             | JMDC      |                                                                                                                 | Nationwide   |                                          | 2007 | 2010 | Patient health service utilization        | Health economics                          | Mental, Behavioral and Neurodevelopmental disorders | schizophrenia                                                            | Others                            | aged 25 to 49 years                 |                |
| Nakahara 2010                               | [Analysis of the treatment outcomes for schizophrenia using medical fee receipts]                                                                                                                                                              | JMDC      |                                                                                                                 | Nationwide   |                                          | 2004 | 2006 | Medical treatment status                  | Health economics                          | Mental, Behavioral and Neurodevelopmental disorders | schizophrenia (F20-29)                                                   | Others                            | aged 20 to 49 years                 |                |
| Suwa 2018                                   | The association between smoking cessation outpatient visits and total medical costs: a retrospective, observational analysis of Japanese employee-based public health insurance data                                                           | JMDC      |                                                                                                                 | Nationwide   |                                          | 2005 | 2013 | Intervention effect                       | Health economics                          | Mental, Behavioral and Neurodevelopmental disorders | nicotine dependence (F17.2)                                              | Others                            | aged 21-60 years                    |                |
| Yuzuriha 2019                               | [Burden of illness for alcohol dependence using health insurance claims database in Japan]                                                                                                                                                     | JMDC      | national statistics data (Patients Survey and Statistics of Medical Care Activities in Public Health Insurance) | Nationwide   |                                          | 2015 | 2017 | Health economics                          |                                           | Mental, Behavioral and Neurodevelopmental disorders | alcohol dependence                                                       |                                   |                                     |                |
| 6) Diseases of the nervous system (G00-G99) |                                                                                                                                                                                                                                                |           |                                                                                                                 |              |                                          |      |      |                                           |                                           |                                                     |                                                                          |                                   |                                     |                |
| Fukunishi 2020                              | Alzheimer-type dementia prediction by sparse logistic regression using claim data                                                                                                                                                              | Others    | Health insurance and long-term care insurance databases in a large city                                         | Municipality | a large city in the metropolitan area in | 2012 | 2015 | Prediction model                          | Clinical epidemiology, course of diseases | Diseases of the nervous system                      | Dementia in Alzheimer disease                                            | Older persons                     | being over 75 years old             |                |
| Kuboyama 2019                               | Medical expenses for clobazam to treat Alzheimer's disease in Japan                                                                                                                                                                            | NHI/LSEHS | National Health Insurance and the Long-term Care Insurance systems                                              | Prefecture   | a prefecture in Japan                    | 2010 | 2011 | Health economics                          |                                           | Diseases of the nervous system                      | Clobazam to treat Alzheimer's disease                                    |                                   |                                     |                |
| Kadohara 2017                               | Prescription Patterns of Medications for Alzheimer's Disease in Japan from 2010 to 2015: A Descriptive Pharmacy Claims Database Study                                                                                                          | Others    | pharmacy claims databases (operated by four community pharmacy chains)                                          | Nationwide   |                                          | 2010 | 2014 | Medical treatment status                  |                                           | Diseases of the nervous system                      | Alzheimer's disease                                                      | Others                            | 20 years or older                   |                |
| Kadohara 2017                               | Diabetes mellitus and risk of early-onset Alzheimer's disease: a population-based case-control study                                                                                                                                           | JMDC      |                                                                                                                 | Nationwide   |                                          | 2005 | 2016 | Clinical epidemiology, course of diseases |                                           | Diseases of the nervous system                      | Alzheimer's disease (AD), Diabetes mellitus                              | Others                            | aged 40-64 years                    |                |
| Fukamachi 2018                              | Exploratory evaluation of a commercially available Japanese medical record database as an external control for comparative clinical trials in new drug development: Amyotrophic lateral sclerosis                                              | MDV       | compared with phase 3 trials                                                                                    | Nationwide   |                                          | 2008 | 2016 | Intervention effect                       | Research methodology                      | Diseases of the nervous system                      | Amyotrophic lateral sclerosis                                            | Others                            | aged 18-75 years                    |                |
| Ishikawa 2020                               | Folic acid prescribed to prenatal and postpartum women who are also prescribed antiepileptic drugs in Japan: Data from a health administrative database                                                                                        | JMDC      |                                                                                                                 | Nationwide   |                                          | 2005 | 2016 | Medical treatment status                  |                                           | Diseases of the nervous system                      | antiepileptic drugs, folic acid (prenatal and postpartum women)          |                                   |                                     |                |
| Ishikawa 2019                               | Examination of the prescription of antiepileptic drugs to prenatal and postpartum women in Japan from a health administrative database                                                                                                         | JMDC      |                                                                                                                 | Nationwide   |                                          | 2005 | 2016 | Medical treatment status                  |                                           | Diseases of the nervous system                      | antiepileptic drugs, prenatal and postpartum women                       |                                   |                                     |                |
| Toyokawa 2017                               | Estimation of the number of children with cerebral palsy using nationwide health insurance claims data in Japan                                                                                                                                | NDB       |                                                                                                                 | Nationwide   |                                          | 2012 | 2013 | Clinical epidemiology, course of diseases |                                           | Diseases of the nervous system                      | cerebral palsy                                                           | Children                          | aged below 20 years                 |                |
| Kishi 2020                                  | General medical claims for behavioral health patients in Japan                                                                                                                                                                                 | JMDC      |                                                                                                                 | Nationwide   |                                          | 2014 | 2015 | Health economics                          |                                           | Diseases of the nervous system                      | behavioral health patients: G30-31 (dementia), chronic medical condition | Others                            | 18 years and older                  |                |
| Shigemori 2019                              | Recent overview of patients with anti-N-methyl-D-aspartate receptor encephalitis using a national inpatient database in Japan                                                                                                                  | DPC       |                                                                                                                 | Nationwide   |                                          | 2010 | 2017 | Medical treatment status                  | Intervention effect                       | Diseases of the nervous system                      | anti-NMDAR encephalitis (ICD-10 code G048 or G049)                       |                                   | age categories                      |                |
| Hatachi 2020                                | Prognostic factors among children with acute encephalitis/encephalopathy associated with viral and other pathogens                                                                                                                             | DPC       |                                                                                                                 | Nationwide   |                                          | 2010 | 2018 | Clinical epidemiology, course of diseases |                                           | Diseases of the nervous system                      | Certain infectious and parasitic diseases                                | Acute encephalitis/encephalopathy | Children                            | aged ≤18 years |
| Hayakawa 2020                               | Recent treatment patterns and variations for pediatric acute encephalopathy in Japan                                                                                                                                                           | DPC       |                                                                                                                 | Nationwide   |                                          | 2010 | 2016 | Medical treatment status                  | Health policy evaluation and utilization  | Diseases of the nervous system                      | pediatric acute encephalopathy                                           | Children                          | between 1 month and 15 years of age |                |
| Nakamura 2020                               | Phenytoin versus fosphenytoin for second-line treatment of status epilepticus: propensity score matching analysis using a nationwide inpatient database                                                                                        | DPC       |                                                                                                                 | Nationwide   |                                          | 2011 | 2015 | Intervention effect                       |                                           | Diseases of the nervous system                      | epilepticus (ICD-10 code: G41)                                           | Others                            | ≥16 year of age                     |                |
| Chen 2021                                   | Prescription patterns of antiepileptic drugs for adult patients with newly diagnosed focal epilepsy from 2006 to 2017 in Japan                                                                                                                 | JMDC      |                                                                                                                 | Nationwide   |                                          | 2006 | 2017 | Medical treatment status                  | Quality of care                           | Diseases of the nervous system                      | epilepsy                                                                 | Others                            | aged 20-65 years                    |                |
| Nakamura 2020                               | Levetiracetam vs. Fosphenytoin for Second-Line Treatment of Status Epilepticus: Propensity Score Matching Analysis Using a Nationwide Inpatient Database                                                                                       | DPC       |                                                                                                                 | Nationwide   |                                          | 2011 | 2018 | Intervention effect                       |                                           | Diseases of the nervous system                      | epilepticus                                                              | Others                            | aged ≥15 years                      |                |
| Nakamura 2020                               | Changes in Real-world Practice Patterns of Antiepileptic Drugs for Status Epilepticus: A Nationwide Observational Study in Japan                                                                                                               | DPC       |                                                                                                                 | Nationwide   |                                          | 2011 | 2018 | Medical treatment status                  | Intervention effect                       | Diseases of the nervous system                      | epilepticus                                                              | Others                            | aged ≥15 years                      |                |
| Hirano 2018                                 | Risk of Extrapyramidal Syndromes Associated With Psychotropic Polypharmacy: A Study Based on Large-Scale Japanese Claims Data                                                                                                                  | Others    | MinaCare                                                                                                        | Nationwide   |                                          | 2011 | 2016 | Intervention effect                       |                                           | Diseases of the nervous system                      | Extrapyramidal syndromes                                                 |                                   |                                     |                |
| Inokuchi 2014                               | Effect of rehabilitation on mortality of patients with Guillain-Barre Syndrome: a propensity-matched analysis using nationwide database                                                                                                        | DPC       |                                                                                                                 | Nationwide   |                                          | 2007 | 2011 | Intervention effect                       |                                           | Diseases of the nervous system                      | Guillain-Barre Syndrome (G610)                                           |                                   | age category                        |                |

|                |                                                                                                                                                                                                                        |          |                                                                                                 |            |                                                              |      |                                           |                                           |                                |                                                                     |                                                          |                                                                     |
|----------------|------------------------------------------------------------------------------------------------------------------------------------------------------------------------------------------------------------------------|----------|-------------------------------------------------------------------------------------------------|------------|--------------------------------------------------------------|------|-------------------------------------------|-------------------------------------------|--------------------------------|---------------------------------------------------------------------|----------------------------------------------------------|---------------------------------------------------------------------|
| Kobori 2017    | Coexisting infectious diseases on admission as a risk factor for mechanical ventilation in patients with Guillain-Barre syndrome                                                                                       | DPC      | DPC research group                                                                              | Nationwide | 2010                                                         | 2012 | Clinical epidemiology, course of diseases |                                           | Diseases of the nervous system |                                                                     | Guillain-Barre Syndrome                                  | age group                                                           |
| Yonezawa 2020  | Effect of Early Tracheostomy on Mortality of Mechanically Ventilated Patients with Guillain-Barre Syndrome: A Nationwide Observational Study                                                                           | DPC      |                                                                                                 | Nationwide | 2010                                                         | 2018 | Intervention effect                       |                                           | Diseases of the nervous system |                                                                     | Guillain-Barre Syndrome (ICD-10 code: G610)              | Others<br>aged 18 years or older                                    |
| Matsuda 2010   | [Epidemiological study of Guillain-Barre syndrome based on DPC database]                                                                                                                                               | DPC      |                                                                                                 | Nationwide | 2008                                                         | 2008 | Research methodology                      | Medical treatment status                  | Diseases of the nervous system |                                                                     | Guillain-Barre syndrome                                  |                                                                     |
| Mizobuchi 2017 | The Current Status of Microvascular Decompression for the Treatment of Hemifacial Spasm in Japan: An Analysis of 2907 Patients Using the Japanese Diagnosis Procedure Combination Database                             | DPC      | DPC Research Institute                                                                          | Nationwide | 2010                                                         | 2013 | Medical treatment status                  | Intervention effect                       | Diseases of the nervous system |                                                                     | Hemifacial Spasm (G 513)                                 |                                                                     |
| Meyers 2019    | Treatment patterns and characteristics of patients with migraine in Japan: A retrospective analysis of health insurance claims data                                                                                    | JMDC     |                                                                                                 | Nationwide | 2011                                                         | 2014 | Clinical epidemiology, course of diseases | Medical treatment status                  | Diseases of the nervous system |                                                                     | migraine                                                 | Others<br>aged ≥18 years                                            |
| Kawachi 2019   | Recent transition of medical cost and relapse rate of multiple sclerosis in Japan based on analysis of a health insurance claims database                                                                              | MDV      |                                                                                                 | Nationwide | 2008                                                         | 2016 | Health economics                          | Intervention effect                       | Diseases of the nervous system |                                                                     | multiple sclerosis (G35)                                 |                                                                     |
| Ogino 2018     | Treatment and comorbidities of multiple sclerosis in an employed population in Japan: analysis of health claims data                                                                                                   | JMDC     |                                                                                                 | Nationwide | 2005                                                         | 2014 | Clinical epidemiology, course of diseases | Medical treatment status                  | Diseases of the nervous system |                                                                     | multiple sclerosis (G35)                                 | Others<br><65 years old                                             |
| Ogino 2017     | Prevalence, treatments and medical cost of multiple sclerosis in Japan based on analysis of a health insurance claims database                                                                                         | JMDC     |                                                                                                 | Nationwide | 2005                                                         | 2016 | Clinical epidemiology, course of diseases | Health economics                          | Diseases of the nervous system |                                                                     | multiple sclerosis (G35)                                 |                                                                     |
| Ogino 2016     | Current treatment status and medical cost for multiple sclerosis based on analysis of a Japanese claims database                                                                                                       | MDV      |                                                                                                 | Nationwide | 2008                                                         | 2014 | Medical treatment status                  | Health economics                          | Diseases of the nervous system |                                                                     | multiple sclerosis (G35)                                 |                                                                     |
| Mouri 2020     | Effect of Sugammadex on Postoperative Myasthenic Crisis in Myasthenia Gravis Patients: Propensity Score Analysis of a Japanese Nationwide Database                                                                     | DPC      |                                                                                                 | Nationwide | 2010                                                         | 2016 | Intervention effect                       |                                           | Diseases of the nervous system |                                                                     | Myasthenia Gravis (ICD-10 code: G70.0)                   | Others<br>aged ≥20 years                                            |
| Murai 2019     | Clinical burden and healthcare resource utilization associated with myasthenia gravis: Assessments from a Japanese claims database                                                                                     | MDV      |                                                                                                 | Nationwide | 2008                                                         | 2016 | Clinical epidemiology, course of diseases | Patient health service utilization        | Diseases of the nervous system |                                                                     | myasthenia gravis (G70.0)                                | Others<br>aged ≥18 years                                            |
| Ogino 2015     | [The Analysis of the Unevenness of Treatment for the Nervous Diseases by the Area Judging from Receipt Data]                                                                                                           | Others   | Health Insurance Claims Review & Reimbursement services, National Health Insurance Organization | Nationwide | 2009                                                         | 2011 | Socioeconomic comparison                  | Health economics                          | Diseases of the nervous system |                                                                     | Nervous Diseases                                         |                                                                     |
| Ogino 2014     | [High-cost medical care in intractable neuroimmunological diseases : Is the DPC/PDPS payment system efficient for this population?]                                                                                    | Others   | Health Insurance Claims Review & Reimbursement services                                         | Nationwide | 2011                                                         | 2011 | Health economics                          | Medical treatment status                  | Diseases of the nervous system |                                                                     | intractable neuroimmunological diseases                  |                                                                     |
| Nakamura 2012  | Mortality of neuroleptic malignant syndrome induced by typical and atypical antipsychotic drugs: a propensity-matched analysis from the Japanese Diagnosis Procedure Combination database                              | DPC      |                                                                                                 | Nationwide | 2004                                                         | 2008 | Intervention effect                       |                                           | Diseases of the nervous system |                                                                     | neuroleptic malignant syndrome (ICD-10 code: G210)       |                                                                     |
| Hirakata 2018  | Pregabalin Prescription for Neuropathic Pain and Fibromyalgia: A Descriptive Study Using Administrative Database in Japan                                                                                              | MDV      |                                                                                                 | Nationwide | 2010                                                         | 2013 | Medical treatment status                  |                                           | Diseases of the nervous system |                                                                     | neuropathic pain and fibromyalgia (pregabalin use)       |                                                                     |
| Suzuki 2020    | Adherence to treatment guideline recommendations for Parkinson's disease in Japan: A longitudinal analysis of a nationwide medical claims database between 2008 and 2016                                               | MDV      |                                                                                                 | Nationwide | 2008                                                         | 2016 | Medical treatment status                  | Quality of care                           | Diseases of the nervous system |                                                                     | Parkinson's disease                                      | Others<br>≥30 years of age                                          |
| Nakaoka 2014   | Prescribing pattern of anti-Parkinson drugs in Japan: a trend analysis from 2005 to 2010                                                                                                                               | JMDC     |                                                                                                 | Nationwide | 2005                                                         | 2010 | Medical treatment status                  | Health policy evaluation and utilization  | Diseases of the nervous system |                                                                     | Parkinson's disease (G-20)                               | Others<br>younger than 30 years were excluded                       |
| Oichi 2017     | Mortality and morbidity after spinal surgery in patients with Parkinson's disease: a retrospective matched-pair cohort study                                                                                           | DPC      |                                                                                                 | Nationwide | 2010                                                         | 2013 | Clinical epidemiology, course of diseases |                                           | Diseases of the nervous system | Others                                                              | Parkinson's disease, spinal surgery                      | Others<br>aged 20 years or older                                    |
| Ooba 2011      | The impact in Japan of regulatory action on prescribing of dopamine receptor agonists: analysis of a claims database between 2005 and 2008                                                                             | JMDC     |                                                                                                 | Nationwide | 2005                                                         | 2008 | Health policy evaluation and utilization  |                                           | Diseases of the nervous system |                                                                     | Parkinson's disease                                      | Others<br>age ≥40 years                                             |
| Iketani 2020   | Risk stratification for physical morbidity using factors associated with atypical antipsychotic treatment in Parkinson's disease: A retrospective observational study using administrative claims data                 | Others   | NHO: MIA databank                                                                               | Nationwide | 2012                                                         | 2017 | Prediction model                          | Medical treatment status                  | Diseases of the nervous system |                                                                     | Parkinson's disease                                      | Others<br>aged over 50 years                                        |
| Suzuki 2020    | Prescription pattern of anti-Parkinson's disease drugs in Japan based on a nationwide medical claims database                                                                                                          | MDV      |                                                                                                 | Nationwide | 2008                                                         | 2016 | Medical treatment status                  |                                           | Diseases of the nervous system |                                                                     | Parkinson's disease                                      | Others<br>aged ≥30 years                                            |
| Iketani 2019   | Comparison of the association of risperidone and quetiapine with deteriorating performance in walking and dressing in subjects with Parkinson's disease: a retrospective cohort study using administrative claims data | DPC      | NHO: MIA databank                                                                               | Nationwide | 2012                                                         | 2017 | Intervention effect                       |                                           | Diseases of the nervous system |                                                                     | Parkinson's disease                                      |                                                                     |
| Iwaki 2019     | Comparison of zonisamide with non-levodopa, anti-Parkinson's disease drugs in the incidence of Parkinson's disease-relevant symptoms                                                                                   | MDV      |                                                                                                 | Nationwide | 2008                                                         | 2014 | Intervention effect                       |                                           | Diseases of the nervous system |                                                                     | Parkinson's disease                                      | Others<br>aged ≥40 years                                            |
| Kasamo 2019    | Real-world pharmacological treatment patterns of patients with young-onset Parkinson's disease in Japan: a medical claims database analysis                                                                            | JMDC     |                                                                                                 | Nationwide | 2005                                                         | 2016 | Clinical epidemiology, course of diseases | Medical treatment status                  | Diseases of the nervous system |                                                                     | young-onset Parkinson's disease                          | Others<br>aged 21-50 years                                          |
| Akazawa 2018   | Cost-Minimization Analysis of Deep-Brain Stimulation Using National Database of Japanese Health Insurance Claims                                                                                                       | NDB      |                                                                                                 | Nationwide | 2009                                                         | 2015 | Health economics                          |                                           | Diseases of the nervous system |                                                                     | Parkinson's disease and other movement disorders         | no restriction of age                                               |
| Nakaoka 2011   | Echocardiography for the detection of valvulopathy associated with the use of ergot-derived dopamine agonists in patients with Parkinson's disease                                                                     | JMDC     | JMDC-MDB                                                                                        | Nationwide | 2005                                                         | 2008 | Medical treatment status                  | Quality of care                           | Diseases of the nervous system | Diseases of the circulatory system                                  | Parkinson's Disease, valvulopathy                        | Others<br>excluded younger than 30 years                            |
| Sengoku 2019   | [Treatment of peripheral facial paralysis in Japan: observation study using a health insurance claims database]                                                                                                        | JMDC     |                                                                                                 | Nationwide | 2010                                                         | 2012 | Medical treatment status                  |                                           | Diseases of the nervous system |                                                                     | peripheral facial paralysis                              |                                                                     |
| Makito 2020    | Incidence and risk factors for post-dural puncture headache after neuraxial anaesthesia: A national inpatient database study in Japan                                                                                  | DPC      |                                                                                                 | Nationwide | 2010                                                         | 2017 | Intervention effect                       | Clinical epidemiology, course of diseases | Diseases of the nervous system | Injury, poisoning and certain other consequences of external causes | post-dural puncture headache after neuraxial anaesthesia | Others<br>aged ≥20 years                                            |
| Miyashita 2020 | The Association Between Hemoglobin Upswing in the Reference Range and Sleep Apnea Syndrome                                                                                                                             | JMDC     |                                                                                                 | Nationwide | 2013                                                         | 2016 | Clinical epidemiology, course of diseases |                                           | Diseases of the nervous system |                                                                     | Sleep apnea syndrome                                     | Others<br>aged 40-59 years                                          |
| Inada 2021     | Prescribing Pattern of Hypnotic Medications in Patients Initiating Treatment at Japanese Hospitals: A Nationwide, Retrospective, Longitudinal, Observational Study Using a Claims Database                             | MDV      |                                                                                                 | Nationwide | 2012                                                         | 2016 | Medical treatment status                  | Quality of care                           | Diseases of the nervous system |                                                                     | insomnia                                                 |                                                                     |
| Maeda 2016     | Quantification of adverse effects of regular use of triazolam on clinical outcomes for older people with insomnia: a retrospective cohort study                                                                        | NHI/LEHS | Fukuoka Late Stage Elderly Healthcare Insurance Organization                                    | Prefecture | Fukuoka Late Stage Elderly Healthcare Insurance Organization | 2010 | 2013                                      | Intervention effect                       |                                | Diseases of the nervous system                                      | insomnia                                                 | Older persons<br>aged 75 years and older, or those aged 65-74 years |

|                                                      |                                                                                                                                                                                                                                                |        |                                         |            |                           |      |                                           |                                              |                                         |                                                              |                                                                                             |                                               |
|------------------------------------------------------|------------------------------------------------------------------------------------------------------------------------------------------------------------------------------------------------------------------------------------------------|--------|-----------------------------------------|------------|---------------------------|------|-------------------------------------------|----------------------------------------------|-----------------------------------------|--------------------------------------------------------------|---------------------------------------------------------------------------------------------|-----------------------------------------------|
| Fujimoto 2014                                        | [The Association between Statin Use and the Risk of Sleep Disturbances: Data Mining of Claims Database]                                                                                                                                        | JMDC   |                                         | Nationwide | 2005                      | 2011 | Intervention effect                       |                                              | Diseases of the nervous system          | Others                                                       |                                                                                             | statin use and the risk of sleep disturbances |
| Ishikawa 2021                                        | Spinal Cord Infarction after Bronchial Artery Embolization for Hemoptysis: A Nationwide Observational Study in Japan                                                                                                                           | DPC    |                                         | Nationwide | 2010                      | 2018 | Clinical epidemiology, course of diseases | Intervention effect                          | Diseases of the nervous system          | Others                                                       | hemoptysis (ICD-10 codes R042, R048, and R049, spinal cord infarction)                      | Others aged ≥18 years                         |
| Kawahara 2013                                        | [Development of medical care for spinocerebellar degeneration] (Part 5) Characteristic analysis of medical costs required for SCD and SLE)*                                                                                                    | MDV    |                                         | Nationwide | 2010                      | 2012 | Health economics                          |                                              | Diseases of the nervous system          | Diseases of the musculoskeletal system and connective tissue | spinocerebellar degeneration, systemic lupus erythematosus                                  |                                               |
| Mizobuchi 2018                                       | The Current Status of Microvascular Decompression for the Treatment of Trigeminal Neuralgia in Japan: An Analysis of 1619 Patients Using the Japanese Diagnosis Procedure Combination Database                                                 | DPC    |                                         | Nationwide | 2010                      | 2013 |                                           | Intervention effect Medical treatment status | Diseases of the nervous system          |                                                              | Trigeminal Neuralgia                                                                        |                                               |
| 7) Diseases of the eye and adnexa (H00-H59)          |                                                                                                                                                                                                                                                |        |                                         |            |                           |      |                                           |                                              |                                         |                                                              |                                                                                             |                                               |
| Sakai 2013                                           | DPC Based Situation Analysis of Generic Antibiotics Use among the Japanese Acute Care Hospitals                                                                                                                                                | DPC    |                                         | Nationwide | 2010                      | 2010 | Medical treatment status                  | Health policy evaluation and utilization     | Diseases of the eye and adnexa          | Others                                                       | surgical cataract cases, antibiotics use                                                    |                                               |
| Kido 2020                                            | Nationwide incidence of central retinal artery occlusion in Japan: an exploratory descriptive study using the National Database of Health Insurance Claims (2011-2015)                                                                         | NDB    | Sampling data                           | Nationwide | 2011                      | 2015 | Clinical epidemiology, course of diseases |                                              | Diseases of the eye and adnexa          |                                                              | central retinal artery occlusion (H34.1)                                                    |                                               |
| Furuta 2016                                          | [Retrospective Analysis of a Health-Insurance Claims Database to Investigate the Prevalence of Dacryocystitis and Dacryostenosis Related Cases and Its Correlation with Rebamipide in Ophthalmic Suspensions Administered to Dry-Eye Patients] | JMDC   |                                         | Nationwide | 2014                      | 2015 | Intervention effect                       |                                              | Diseases of the eye and adnexa          |                                                              | Dacryocystitis and dacryostenosis related cases                                             |                                               |
| Fukuda 2021                                          | Medical Costs of and Changes in Glaucoma Treatment among Patients Newly Starting Glaucoma Care                                                                                                                                                 | JMDC   |                                         | Nationwide | 2005                      | 2016 | Health economics                          | Medical treatment status                     | Diseases of the eye and adnexa          |                                                              | glaucoma                                                                                    |                                               |
| Ooba 2020                                            | Comparison between high and low potency statins in the incidence of open-angle glaucoma: A retrospective cohort study in Japanese working-age population                                                                                       | JMDC   |                                         | Nationwide | 2005                      | 2014 | Intervention effect                       |                                              | Diseases of the eye and adnexa          |                                                              | glaucoma (H40 in ICD-10 code)                                                               | Others 20- to 74-year age group               |
| Sakamoto 2017                                        | Changes in Glaucoma Medication during the Past Eight Years and Future Directions in Japan Based on an Insurance Medical Claim Database                                                                                                         | JMDC   |                                         | Nationwide | 2006                      | 2013 | Medical treatment status                  | Clinical epidemiology, course of diseases    | Diseases of the eye and adnexa          |                                                              | Glaucoma                                                                                    |                                               |
| Kashiwagi 2014                                       | Persistence with topical glaucoma therapy among newly diagnosed Japanese patients                                                                                                                                                              | JMDC   |                                         | Nationwide | 2005                      |      | Patient health service utilization        |                                              | Diseases of the eye and adnexa          |                                                              | glaucoma                                                                                    |                                               |
| Hashimoto 2020                                       | Intraocular pressure-lowering medications during pregnancy and risk of neonatal adverse outcomes: a propensity score analysis using a large database                                                                                           | JMDC   |                                         | Nationwide | 2005                      | 2018 | Intervention effect                       |                                              | Diseases of the eye and adnexa          | Certain conditions originating in the perinatal period       | glaucoma, neonatal adverse outcomes (congenital anomalies, preterm birth, low birth weight) | pregnant women                                |
| Kashiwagi 2020                                       | Persistence and treatment patterns of fixed combination drugs for glaucoma: a retrospective claims database study in Japan                                                                                                                     | JMDC   |                                         | Nationwide | 2005                      | 2016 | Medical treatment status                  | Patient health service utilization           | Diseases of the eye and adnexa          |                                                              | glaucoma                                                                                    | Others aged ≥20 years                         |
| Hashimoto 2019                                       | [Clinical Science : Recent Trends in Glaucoma Surgery in Japan : a Descriptive Study Using Large-scale Databases]                                                                                                                              | Others | NDB open data, DPC                      | Nationwide | 2010                      | 2016 | Medical treatment status                  |                                              | Diseases of the eye and adnexa          |                                                              | Glaucoma Surgery                                                                            |                                               |
| Shirai 2021                                          | Adherence and Persistence with First-Line Therapy and Compliance with Glaucoma Guidelines Using Japanese Health Care/Pharmacy Claims Database                                                                                                  | Others | MinaCare                                | Nationwide | 2011                      | 2016 | Patient health service utilization        | Quality of care                              | Diseases of the eye and adnexa          |                                                              | topical glaucoma                                                                            |                                               |
| Shirai 2021                                          | Comparison of adherence between fixed and unfixed topical combination glaucoma therapies using Japanese healthcare/pharmacy claims database: a retrospective non-interventional cohort study                                                   | Others | MinaCare                                | Nationwide | 2011                      | 2016 | Patient health service utilization        |                                              | Diseases of the eye and adnexa          |                                                              | glaucoma                                                                                    |                                               |
| Shirai 2021                                          | Risk factors leading to trabeculectomy surgery of glaucoma patient using Japanese nationwide administrative claims data: a retrospective non-interventional cohort study                                                                       | DPC    |                                         | Nationwide | 2012                      | 2018 | Clinical epidemiology, course of diseases |                                              | Diseases of the eye and adnexa          |                                                              | glaucoma                                                                                    | age groups                                    |
| Yamano 2017                                          | [Relationship between Medical History of Patients Administered Mikelan (Carteolol Hydrochloride) Ophthalmic Solution and Occurrence of Asthma-related Adverse Events]                                                                          | JMDC   | Otsuka Pharmaceutical Safety Database   | Nationwide | 2014                      | 2015 | Intervention effect                       |                                              | Diseases of the eye and adnexa          | Diseases of the respiratory system                           | glaucoma, asthma                                                                            |                                               |
| Kawano 2019                                          | Current status of late and recurrent intraocular lens dislocation: analysis of real-world data in Japan                                                                                                                                        | MDV    |                                         | Nationwide | 2008                      | 2016 | Clinical epidemiology, course of diseases |                                              | Diseases of the eye and adnexa          |                                                              | late intraocular lens (IOL) dislocation                                                     |                                               |
| Kume 2016                                            | Treatment Patterns and Health Care Costs for Age-Related Macular Degeneration in Japan: An Analysis of National Insurance Claims Data                                                                                                          | JMDC   |                                         | Nationwide | 2005                      | 2013 | Medical treatment status                  | Health economics                             | Diseases of the eye and adnexa          |                                                              | Age-Related Macular Degeneration                                                            | Others 40 years of age or older               |
| Tamiya 2021                                          | Validation study of the claims-based definition for age-related macular degeneration at a single university hospital in Japan                                                                                                                  | Others | claims' data, electronic medical record | Others     | Kyoto University Hospital | 2011 | 2017                                      | Research methodology                         | Diseases of the eye and adnexa          |                                                              | Age-Related Macular Degeneration                                                            | Others                                        |
| Kawasaki 2021                                        | Treatment patterns for retinal diseases in patients newly-treated with anti-VEGF agents: A retrospective analysis of claims data from the Japan Medical Data Center database                                                                   | JMDC   |                                         | Nationwide | 2007                      | 2015 | Medical treatment status                  |                                              | Diseases of the eye and adnexa          | Endocrine, nutritional and metabolic diseases                | retinal disease                                                                             | Others 21-75 years old                        |
| Hashimoto 2020                                       | Recent trends in vitreoretinal surgery: a nationwide database study in Japan, 2010-2017                                                                                                                                                        | DPC    |                                         | Nationwide | 2010                      | 2017 | Medical treatment status                  |                                              | Diseases of the eye and adnexa          |                                                              | vitreoretinal surgery                                                                       |                                               |
| 8) Diseases of the ear and mastoid process (H60-H95) |                                                                                                                                                                                                                                                |        |                                         |            |                           |      |                                           |                                              |                                         |                                                              |                                                                                             |                                               |
| Imai 2021                                            | Probiotic Prescription Status of Pediatric Patients with Otitis Media Receiving Oral Amoxicillin or Amoxicillin/Clavulanate from April 2016 to March 2017 Using a Japanese Health Insurance Claims Database                                    | JMDC   |                                         | Nationwide | 2016                      | 2017 | Medical treatment status                  | Quality of care                              | Diseases of the ear and mastoid process |                                                              | otitis media (H659, H660, H669)                                                             | Children ≤15 years of age                     |
| Yamanaka 2015                                        | [Influence of the Protein-conjugated Pneumococcal Vaccine (PCV7) and the Newly Developed Antimicrobials on the Incidence of Acute Otitis Media and the Frequency of Myringotomy]                                                               | JMDC   |                                         | Nationwide | 2007                      | 2013 | Intervention effect                       | Health policy evaluation and utilization     | Diseases of the ear and mastoid process |                                                              | acute otitis media                                                                          | Children aged <15 years                       |
| Suzuki 2016                                          | Factors associated with prolonged duration of post-tympanoplasty local treatment in adult chronic otitis media patients: A retrospective observational study using a Japanese inpatient database                                               | DPC    |                                         | Nationwide | 2010                      | 2013 | Clinical epidemiology, course of diseases | Intervention effect                          | Diseases of the ear and mastoid process |                                                              | chronic otitis media (post-tympanoplasty local treatment)                                   | Others aged 20 years or older                 |
| Sasaki 2018                                          | Influence of pneumococcal conjugate vaccines on acute otitis media in Japan                                                                                                                                                                    | JMDC   |                                         | Nationwide | 2005                      | 2015 | Intervention effect                       | Health policy evaluation and utilization     | Diseases of the ear and mastoid process | Diseases of the respiratory system                           | acute otitis media, pneumococcal conjugate vaccines                                         | Children patients <15 years                   |
| 9) Diseases of the circulatory system (I00-I99)      |                                                                                                                                                                                                                                                |        |                                         |            |                           |      |                                           |                                              |                                         |                                                              |                                                                                             |                                               |
| Ohnuma 2016                                          | Hospital mortality of patients aged 80 and older after surgical repair for type A acute aortic dissection in Japan                                                                                                                             | DPC    |                                         | Nationwide | 2011                      | 2013 | Clinical epidemiology, course of diseases |                                              | Diseases of the circulatory system      |                                                              | type A acute aortic dissection (ICD-10 of I71.0)                                            | Older persons aged 80 and older               |
| Ohbe 2020                                            | Extracorporeal cardiopulmonary resuscitation for acute aortic dissection during cardiac arrest: A nationwide retrospective observational study                                                                                                 | DPC    |                                         | Nationwide | 2010                      | 2018 | Intervention effect                       | Health economics                             | Diseases of the circulatory system      |                                                              | acute aortic dissection                                                                     | Others aged ≥18 years                         |
| Yamaguchi 2020                                       | Current status of the management and outcomes of acute aortic dissection in Japan: Analyses of nationwide Japanese Registry of All Cardiac and Vascular Diseases-Diagnostic Procedure Combination data                                         | DPC    | JROAD-DPC                               | Nationwide | 2012                      | 2015 | Clinical epidemiology, course of diseases | Medical treatment status                     | Diseases of the circulatory system      |                                                              | acute aortic dissection                                                                     |                                               |
| Horiguchi 2010                                       | Impact of drug-eluting stents on treatment option mix for coronary artery disease in Japan                                                                                                                                                     | DPC    |                                         | Nationwide | 2004                      | 2007 | Medical treatment status                  |                                              | Diseases of the circulatory system      |                                                              | angina pectoris, acute myocardial infarction                                                |                                               |
| Izumi 2015                                           | [Surveillance on Concomitant Medications and Adherence to Anticoagulants in patients Treated with Oral Anticoagulants]                                                                                                                         | Others | JMIRI                                   | Nationwide | 2014                      | 2014 | Medical treatment status                  | Patient health service utilization           | Diseases of the circulatory system      |                                                              | oral anticoagulants                                                                         |                                               |

|                |                                                                                                                                                                                                                          |           |                                                                       |              |                                   |      |                                           |                                           |                                    |                                                                      |                                  |                    |                  |
|----------------|--------------------------------------------------------------------------------------------------------------------------------------------------------------------------------------------------------------------------|-----------|-----------------------------------------------------------------------|--------------|-----------------------------------|------|-------------------------------------------|-------------------------------------------|------------------------------------|----------------------------------------------------------------------|----------------------------------|--------------------|------------------|
| Yamaguchi 2020 | Impact of Endovascular Repair on the Outcomes of Octogenarians with Ruptured Abdominal Aortic Aneurysms: A Nationwide Japanese Study                                                                                     | DPC       | JROAD-DPC                                                             | Nationwide   | 2012                              | 2015 | Intervention effect                       | Socioeconomic comparison                  | Diseases of the circulatory system | ruptured abdominal aortic aneurysm                                   | Others                           | aged ≥20 years     |                  |
| Yamaguchi 2019 | The impact of institutional case volume on the prognosis of ruptured aortic aneurysms: a Japanese nationwide study                                                                                                       | DPC       | JROAD-DPC                                                             | Nationwide   | 2012                              | 2015 | Health policy evaluation and utilization  |                                           | Diseases of the circulatory system | Ruptured aortic aneurysms                                            | Others                           | aged ≥20 years     |                  |
| Yamaguchi 2019 | Editor's Choice - Endovascular Repair Versus Surgical Repair for Japanese Patients With Ruptured Thoracic and Abdominal Aortic Aneurysms: A Nationwide Study                                                             | DPC       | JROAD-DPC                                                             | Nationwide   | 2012                              | 2015 | Intervention effect                       |                                           | Diseases of the circulatory system | Ruptured Thoracic and Abdominal Aortic Aneurysms                     | Others                           | aged ≥20 years     |                  |
| Fukuda 2020    | Comparing Retreatments and Expenditures in Flow Diversion Versus Coiling for Unruptured Intracranial Aneurysm Treatment: A Retrospective Cohort Study Using a Real-World National Database                               | NDB       |                                                                       | Nationwide   | 2015                              | 2018 | Intervention effect                       | Health economics                          | Diseases of the circulatory system | unruptured intracranial aneurysms                                    |                                  |                    |                  |
| Uchida 2014    | Effects of remifentanyl on in-hospital mortality and length of stay following clipping of intracranial aneurysm: a propensity score-matched analysis                                                                     | DPC       | DPC-Research Group                                                    | Nationwide   | 2007                              | 2007 | Intervention effect                       |                                           | Diseases of the circulatory system | intracranial aneurysm                                                |                                  |                    |                  |
| Umegaki 2018   | Comparison of In-hospital Outcomes Between Transcatheter and Surgical Aortic Valve Replacement in Patients with Aortic Valve Stenosis: A Retrospective Cohort Study Using Administrative Data                            | DPC       | DPC Research Group                                                    | Nationwide   | 2012                              | 2015 | Intervention effect                       |                                           | Diseases of the circulatory system | aortic valve stenosis                                                | Others                           | aged ≥20 years     |                  |
| Matsuda 2011   | [Forefront of aortic stenosis treatment: Current status of aortic stenosis treatment as seen from DPC data]*                                                                                                             | DPC       |                                                                       | Nationwide   | 2008                              | 2008 | Medical treatment status                  |                                           | Diseases of the circulatory system | aortic valve stenosis                                                |                                  |                    |                  |
| Yamashita 2017 | [Comparison of the Length of Stay in Patients Hospitalized and Initiated with Dabigatran or Warfarin for a Concomitant Non-Valvular Atrial Fibrillation in Real-world Japanese Therapeutic Practice (SHORT-J)]           | MDV       |                                                                       | Nationwide   | 2011                              | 2016 | Intervention effect                       | Health economics                          | Diseases of the circulatory system | non-valvular atrial fibrillation                                     |                                  |                    |                  |
| Hori 2015      | [Disease burden of cardiovascular events in patients with atrial fibrillation: Medical and economic effects of dabigatran and warfarin]*                                                                                 | MDV       | RE-LY study, Japanese prevalence studies                              | Nationwide   | 2014                              | 2014 | Health economics                          |                                           | Diseases of the circulatory system | atrial fibrillation                                                  |                                  |                    |                  |
| Okumura 2014   | [Estimation of event cost reduction from the administration of apixaban in patients with non-valvular atrial fibrillation]*                                                                                              | MDV       | ARISTOTLE study                                                       | Nationwide   | 2012                              | 2013 | Health economics                          |                                           | Diseases of the circulatory system | non-valvular atrial fibrillation                                     |                                  |                    |                  |
| Ohshima 2019   | Oral anticoagulants usage in Japanese patients aged 18-74 years with non-valvular atrial fibrillation: a retrospective analysis based on insurance claims data                                                           | JMDC      |                                                                       | Nationwide   | 2005                              | 2014 | Medical treatment status                  | Intervention effect                       | Diseases of the circulatory system | non-valvular atrial fibrillation patients (ICD-10: I48.)             | Others                           | aged 18-74 years   |                  |
| Momo 2020      | Predictive factors associated with bleeding in atrial fibrillation patients treated with anti-coagulant drugs using a large claims database                                                                              | JMDC      |                                                                       | Nationwide   | 2004                              | 2016 | Clinical epidemiology, course of diseases |                                           | Diseases of the circulatory system | atrial fibrillation, anti-coagulants                                 |                                  |                    |                  |
| Momo 2019      | Prevalence of drug-drug interaction in atrial fibrillation patients based on a large claims data                                                                                                                         | JMDC      |                                                                       | Nationwide   | 2005                              | 2016 | Medical treatment status                  | Intervention effect                       | Diseases of the circulatory system | drug-drug interaction (DDI) and bleeding rate in atrial fibrillation |                                  |                    |                  |
| Kubota 2018    | The use of anticoagulants in patients with non-valvular atrial fibrillation between 2005 and 2014: A drug utilization study using claims data in Japan                                                                   | JMDC      |                                                                       | Nationwide   | 2005                              | 2014 | Medical treatment status                  | Quality of care                           | Diseases of the circulatory system | Atrial fibrillation (I48)                                            | Others                           | aged 20-74 years   |                  |
| Yokoyama 2018  | Bleeding Risk of Warfarin and Direct Oral Anticoagulants in Younger Population: A Historical Cohort Study Using a Japanese Claims Database                                                                               | JMDC      |                                                                       | Nationwide   | 2012                              | 2015 | Intervention effect                       |                                           | Diseases of the circulatory system | Atrial fibrillation (AF)                                             | Others                           | 18 years or older  |                  |
| Kohsaka 2017   | Bleeding risk of apixaban, dabigatran, and low-dose rivaroxaban compared with warfarin in Japanese patients with non-valvular atrial fibrillation: a propensity matched analysis of administrative claims data           | MDV       |                                                                       | Nationwide   | 2011                              | 2016 | Intervention effect                       |                                           | Diseases of the circulatory system | non-valvular atrial fibrillation (I48)                               | Others                           | aged ≥18 years     |                  |
| Kohsaka 2018   | Safety and effectiveness of apixaban in comparison to warfarin in patients with nonvalvular atrial fibrillation: a propensity-matched analysis from Japanese administrative claims data                                  | MDV       |                                                                       | Nationwide   | 2011                              | 2017 | Intervention effect                       |                                           | Diseases of the circulatory system | atrial fibrillation (I48)                                            | Others                           | aged ≥18 years     |                  |
| Maeda 2021     | Residual risks of ischaemic stroke and systemic embolism among atrial fibrillation patients with anticoagulation: large-scale real-world data (F-CREATE project)                                                         | JMDC      |                                                                       | Others       | Fukuoka                           | 2005 | 2017                                      | Clinical epidemiology, course of diseases | Diseases of the circulatory system | atrial fibrillation (ICD-10: I48)                                    | Others                           | 20-74 years of age |                  |
| Narita 2020    | Trends in Prevalence of Non-Valvular Atrial Fibrillation and Anticoagulation Therapy in a Japanese Region: Analysis Using the National Health Insurance Database                                                         | NHI/LSEHS | Japanese National Health Insurance database ("Kokuhō" database [KDB]) | Municipality | Tsugaru region (5 municipalities) | 2014 | 2017                                      | Clinical epidemiology, course of diseases | Medical treatment status           | Diseases of the circulatory system                                   | non-valvular atrial fibrillation | Others             | aged 40-74 years |
| Yasaka 2020    | Incidence Rates of Bleeding and Emergency Surgery Due to Trauma or Fracture Among Japanese Patients with Non-valvular Atrial Fibrillation Receiving Oral Anticoagulation Therapy                                         | MDV       |                                                                       | Nationwide   | 2011                              | 2016 | Clinical epidemiology, course of diseases |                                           | Diseases of the circulatory system | nonvalvular atrial fibrillation (I48)                                | Others                           | age >18 years      |                  |
| Suzuki 2019    | Potential of machine learning methods to identify patients with nonvalvular atrial fibrillation                                                                                                                          | MDV       |                                                                       | Nationwide   | 2008                              | 2017 | Prediction model                          | Medical treatment status                  | Diseases of the circulatory system | nonvalvular atrial fibrillation                                      |                                  |                    |                  |
| Koretsumi 2017 | Usefulness of a healthcare database for epidemiological research in atrial fibrillation                                                                                                                                  | MDV       | comparable with J-RHYTHM Registry and Fushimi AF Registry             | Nationwide   | 2008                              | 2013 | Research methodology                      | Clinical epidemiology, course of diseases | Diseases of the circulatory system | non-valvular atrial fibrillation                                     |                                  |                    |                  |
| Yagi 2021      | Current status of oral anticoagulant adherence in Japanese patients with atrial fibrillation: A claims database analysis                                                                                                 | JMDC      |                                                                       | Nationwide   | 2010                              | 2019 | Patient health service utilization        |                                           | Diseases of the circulatory system | atrial fibrillation                                                  |                                  |                    |                  |
| Kario 2020     | Impact of pre-existing hypertension and control status before atrial fibrillation onset on cardiovascular prognosis in patients with non-valvular atrial fibrillation: A real-world database analysis in Japan           | JMDC      |                                                                       | Nationwide   | 2005                              | 2016 | Clinical epidemiology, course of diseases |                                           | Diseases of the circulatory system | atrial fibrillation                                                  | Others                           | aged 0-75 years    |                  |
| Kohsaka 2020   | Safety and effectiveness of non-vitamin K oral anticoagulants versus warfarin in real-world patients with non-valvular atrial fibrillation: a retrospective analysis of contemporary Japanese administrative claims data | MDV       |                                                                       | Nationwide   | 2011                              | 2018 | Intervention effect                       |                                           | Diseases of the circulatory system | non-valvular atrial fibrillation                                     | Others                           | aged ≥18 years     |                  |
| Maeda 2020     | Risks of Bleeding and Stroke Based on CHA2DS2-VASc Scores in Japanese Patients With Atrial Fibrillation: A Large-Scale Observational Study Using Real-World Data                                                         | JMDC      |                                                                       | Nationwide   | 2005                              | 2017 | Clinical epidemiology, course of diseases |                                           | Diseases of the circulatory system | atrial fibrillation or atrial flutter                                | Others                           | aged 21-74 years   |                  |

|                |                                                                                                                                                                                                                                                                      |           |                                                                                  |            |                                                                                          |      |                                           |                                          |                                    |                                      |                                                                                              |                |                        |
|----------------|----------------------------------------------------------------------------------------------------------------------------------------------------------------------------------------------------------------------------------------------------------------------|-----------|----------------------------------------------------------------------------------|------------|------------------------------------------------------------------------------------------|------|-------------------------------------------|------------------------------------------|------------------------------------|--------------------------------------|----------------------------------------------------------------------------------------------|----------------|------------------------|
| Koretsune 2019 | Comparative effectiveness and safety of warfarin and dabigatran in patients with non-valvular atrial fibrillation in Japan: A claims database analysis                                                                                                               | MDV       |                                                                                  | Nationwide | 2011                                                                                     | 2016 | Intervention effect                       | Medical treatment status                 | Diseases of the circulatory system | non-valvular atrial fibrillation     | Others                                                                                       | aged ≥18 years |                        |
| Satoh 2020     | Blood Pressure and Chronic Kidney Disease Stratified by Gender and the Use of Antihypertensive Drugs                                                                                                                                                                 | JMDC      |                                                                                  | Nationwide | 2008                                                                                     | 2017 | Clinical epidemiology, course of diseases |                                          | Diseases of the circulatory system | Diseases of the genitourinary system | blood pressure and the risk of chronic kidney disease                                        | Others         | 30-74 years of age     |
| Kawamura 2019  | Patient characteristics and in-hospital complications of subcutaneous implantable cardioverter-defibrillator for Brugada syndrome in Japan                                                                                                                           | DPC       |                                                                                  | Nationwide | 2016                                                                                     | 2017 | Intervention effect                       |                                          | Diseases of the circulatory system |                                      | Brugada syndrome (I490)                                                                      |                |                        |
| Kido 2020      | Outcomes of paediatric out-of-hospital cardiac arrest according to hospital characteristic defined by the annual number of paediatric patients with invasive mechanical ventilation: A nationwide study in Japan                                                     | DPC       |                                                                                  | Nationwide | 2010                                                                                     | 2017 | Quality of care                           | Health policy evaluation and utilization | Diseases of the circulatory system |                                      | paediatric out-of-hospital cardiac arrest                                                    | Children       | children (<18 years)   |
| Zamami 2017    | [Drug Repositioning Research Utilizing a Large-scale Medical Claims Database to Improve Survival Rates after Cardiopulmonary Arrest]                                                                                                                                 | JMDC      |                                                                                  | Nationwide | 2005                                                                                     | 2014 | Medical treatment status                  | Intervention effect                      | Diseases of the circulatory system |                                      | Cardiopulmonary Arrest                                                                       | Others         | aged 18 years or older |
| Fukuda 2013    | Health care costs related to out-of-hospital cardiopulmonary arrest in Japan                                                                                                                                                                                         | DPC       |                                                                                  | Nationwide | 2008                                                                                     | 2009 | Health economics                          |                                          | Diseases of the circulatory system |                                      | cardiopulmonary arrest (OHCA)                                                                | Others         | age ≥18 years          |
| Tagiguchi 2021 | Intermittent versus continuous neuromuscular blockade during target temperature management after cardiac arrest: A nationwide observational study                                                                                                                    | DPC       |                                                                                  | Nationwide | 2010                                                                                     | 2018 | Intervention effect                       |                                          | Diseases of the circulatory system |                                      | postcardiac arrest patients                                                                  | Others         | aged ≥18 years         |
| Zamami 2019    | Search for Therapeutic Agents for Cardiac Arrest Using a Drug Discovery Tool and Large-Scale Medical Information Database                                                                                                                                            | JMDC      |                                                                                  | Nationwide | 2005                                                                                     | 2014 | Intervention effect                       |                                          | Diseases of the circulatory system |                                      | cardiac arrest patients                                                                      | Others         | excluded <18 years old |
| Joo 2019       | Effectiveness and safety of early enteral nutrition for patients who received targeted temperature management after out-of-hospital cardiac arrest                                                                                                                   | MDV       |                                                                                  | Nationwide | 2008                                                                                     | 2017 | Intervention effect                       |                                          | Diseases of the circulatory system |                                      | out-of-hospital cardiac arrest                                                               | Others         | ≥20 years of age       |
| Nimura 2017    | Hydrocortisone administration was associated with improved survival in Japanese patients with cardiac arrest                                                                                                                                                         | JMDC      |                                                                                  | Nationwide | 2005                                                                                     | 2014 | Intervention effect                       |                                          | Diseases of the circulatory system |                                      | Cardiac arrest                                                                               |                |                        |
| Tagami 2016    | Early antibiotics administration during targeted temperature management after out-of-hospital cardiac arrest: a nationwide database study                                                                                                                            | DPC       |                                                                                  | Nationwide | 2007                                                                                     | 2013 | Intervention effect                       |                                          | Diseases of the circulatory system |                                      | cardiac arrest                                                                               | Others         | age ≥18 years          |
| Tagami 2016    | Changes in Therapeutic Hypothermia and Coronary Intervention Provision and In-Hospital Mortality of Patients With Out-of-Hospital Cardiac Arrest: A Nationwide Database Study                                                                                        | DPC       |                                                                                  | Nationwide | 2008                                                                                     | 2012 | Medical treatment status                  | Intervention effect                      | Diseases of the circulatory system |                                      | Out-of-Hospital Cardiac Arrest                                                               | Others         | aged ≥18 years         |
| Tagami 2016    | Amiodarone or nifekalant upon hospital arrival for refractory ventricular fibrillation after out-of-hospital cardiac arrest                                                                                                                                          | DPC       |                                                                                  | Nationwide | 2007                                                                                     | 2013 | Intervention effect                       |                                          | Diseases of the circulatory system |                                      | Out-of-Hospital Cardiac Arrest                                                               | Others         | aged ≥18 years         |
| Tagami 2016    | Amiodarone Compared with Lidocaine for Out-Of-Hospital Cardiac Arrest with Refractory Ventricular Fibrillation on Hospital Arrival: a Nationwide Database Study                                                                                                      | DPC       |                                                                                  | Nationwide | 2007                                                                                     | 2013 | Intervention effect                       |                                          | Diseases of the circulatory system |                                      | out-of-hospital cardiac arrest and refractory ventricular fibrillation                       | Others         | aged ≥18 years         |
| Shakya 2017    | In-hospital complications after implantation of cardiac implantable electronic devices: Analysis of a national inpatient database in Japan                                                                                                                           | DPC       |                                                                                  | Nationwide | 2010                                                                                     | 2014 | Intervention effect                       |                                          | Diseases of the circulatory system |                                      | complications after implantation of cardiac implantable electronic devices                   |                | age categories         |
| Aso 2016       | The Effect of Intraortic Balloon Pumping Under Venoarterial Extracorporeal Membrane Oxygenation on Mortality of Cardiogenic Patients: An Analysis Using a Nationwide Inpatient Database                                                                              | DPC       |                                                                                  | Nationwide | 2010                                                                                     | 2013 | Intervention effect                       |                                          | Diseases of the circulatory system |                                      | cardiogenic shock (ICD-10 codes: I05, I07, I08, I20-I22, I33-I35, I40-I42, I46, and I49-I51) |                |                        |
| Ohbe 2018      | Early enteral nutrition for cardiogenic or obstructive shock requiring venoarterial extracorporeal membrane oxygenation: a nationwide inpatient database study                                                                                                       | DPC       |                                                                                  | Nationwide | 2010                                                                                     | 2016 | Intervention effect                       |                                          | Diseases of the circulatory system |                                      | cardiogenic or obstructive shock                                                             | Others         | aged ≥18 years         |
| Higa 2021      | Relationship of Annual Health Checkups with the Subject's Subsequent Behavior of Cardiovascular Risk Management in a Real-World Setting in Japan: A Retrospective Cohort Study on Changes in Antihypertensive Drug Prescription and Blood Pressure from 2015 to 2017 | Others    | MinaCare database                                                                | Nationwide | 2014                                                                                     | 2017 | Patient health service utilization        |                                          | Diseases of the circulatory system |                                      | Cardiovascular Risk                                                                          | Others         | 20 and 74 years        |
| Okuno 2021     | Intra-operative autologous blood donation for cardiovascular surgeries in Japan: A retrospective cohort study                                                                                                                                                        | DPC       |                                                                                  | Nationwide | 2016                                                                                     | 2019 | Intervention effect                       |                                          | Diseases of the circulatory system |                                      | cardiovascular surgeries                                                                     | Others         | aged 18-84 years       |
| Kanaoka 2021   | Current Status and Effect of Outpatient Cardiac Rehabilitation After Percutaneous Coronary Intervention in Japan                                                                                                                                                     | NDB       |                                                                                  | Nationwide | 2014                                                                                     | 2018 | Intervention effect                       |                                          | Diseases of the circulatory system |                                      | cardiovascular diseases                                                                      | Others         | aged ≥20 years         |
| Kaneko 2021    | Possible association between eating behaviors and cardiovascular disease in the general population: Analysis of a nationwide epidemiological database                                                                                                                | JMDC      |                                                                                  | Nationwide | 2005                                                                                     | 2018 | Clinical epidemiology, course of diseases |                                          | Diseases of the circulatory system |                                      | cardiovascular disease                                                                       | Others         | aged ≥20 years         |
| Kaneko 2021    | Association of Blood Pressure Classification Using the 2017 American College of Cardiology/American Heart Association Blood Pressure Guideline with Risk of Heart Failure and Atrial Fibrillation                                                                    | JMDC      |                                                                                  | Nationwide | 2005                                                                                     | 2018 | Clinical epidemiology, course of diseases |                                          | Diseases of the circulatory system |                                      | Heart failure, atrial fibrillation, hypertension                                             | Others         | aged ≥20 years         |
| Shima 2021     | Validation of novel identification algorithms for major adverse cardiovascular events in a Japanese claims database                                                                                                                                                  | Others    | claims database of Jichi Medical University Hospital, electrical medical records | Others     | Jichi Medical University Hospital                                                        | 2012 | 2014                                      | Research methodology                     | Diseases of the circulatory system |                                      | adverse cardiovascular events                                                                | Others         | aged at least 20 years |
| Takura 2021    | Development of a predictive model for integrated medical and long-term care resource consumption based on health behaviour: application of healthcare big data of patients with circulatory diseases                                                                 | NHI/LSEHS | national healthcare database (Kokubo Database, KDB)                              | Others     | (The regions included in the database account for 6.1% of the total population of Japan) | 2014 | 2018                                      | Prediction model                         | Health economics                   | Diseases of the circulatory system   | circulatory disease (ICD-10 I 00-99)                                                         |                | all ages               |
| Kaneko 2020    | Restfulness from sleep and subsequent cardiovascular disease in the general population                                                                                                                                                                               | JMDC      |                                                                                  | Nationwide | 2005                                                                                     | 2018 | Clinical epidemiology, course of diseases |                                          | Diseases of the circulatory system |                                      | cardiovascular disease                                                                       | Others         | aged ≥20 years         |
| Maeda 2017     | Safety of Tranexamic Acid in Pediatric Cardiac Surgery: A Nationwide Database Study                                                                                                                                                                                  | DPC       |                                                                                  | Nationwide | 2010                                                                                     | 2014 | Intervention effect                       |                                          | Diseases of the circulatory system |                                      | pediatric cardiac surgery population                                                         | Children       | aged ≤12 years         |
| Davis 2015     | High-Risk Atherosclerotic Cardiovascular Disease in a Real-World Employed Japanese Population: Prevalence, Cardiovascular Event Rates, and Costs                                                                                                                     | JMDC      |                                                                                  | Nationwide | 2008                                                                                     | 2009 | Clinical epidemiology, course of diseases | Health economics                         | Diseases of the circulatory system |                                      | atherosclerotic cardiovascular disease                                                       | Others         | aged ≥18 years         |
| Kaneko 2021    | Fasting plasma glucose and subsequent cardiovascular disease among young adults: Analysis of a nationwide epidemiological database                                                                                                                                   | JMDC      |                                                                                  | Nationwide | 2005                                                                                     | 2018 | Clinical epidemiology, course of diseases |                                          | Diseases of the circulatory system |                                      | cardiovascular disease                                                                       | Others         | aged 20-49 years       |
| Kitamura 2021  | Safety and effectiveness of intracardiac echocardiography in ventricular tachycardia ablation: a nationwide observational study                                                                                                                                      | DPC       |                                                                                  | Nationwide | 2011                                                                                     | 2017 | Intervention effect                       |                                          | Diseases of the circulatory system |                                      | ventricular tachycardia ablation                                                             | Others         | aged ≥18 years         |
| Kaneko 2020    | Cardiovascular Health Metrics of 87,160 Couples: Analysis of a Nationwide Epidemiological Database                                                                                                                                                                   | JMDC      |                                                                                  | Nationwide | 2005                                                                                     | 2016 | Clinical epidemiology, course of diseases |                                          | Diseases of the circulatory system |                                      | cardiovascular health metrics                                                                | Others         | aged ≥20 years         |

|                |                                                                                                                                                                                                                                                         |           |                                                                                         |            |                                                       |      |      |                                           |                                          |                                    |                                               |                                                                                                                          |        |                                  |
|----------------|---------------------------------------------------------------------------------------------------------------------------------------------------------------------------------------------------------------------------------------------------------|-----------|-----------------------------------------------------------------------------------------|------------|-------------------------------------------------------|------|------|-------------------------------------------|------------------------------------------|------------------------------------|-----------------------------------------------|--------------------------------------------------------------------------------------------------------------------------|--------|----------------------------------|
| Ugata 2020     | Periprocedural hypotension after conscious sedation versus local anesthesia during defibrillator implantation for left ventricular dysfunction: analysis of a national inpatient database in Japan                                                      | DPC       |                                                                                         | Nationwide |                                                       | 2010 | 2016 | Intervention effect                       |                                          | Diseases of the circulatory system |                                               | Implantable cardioverter defibrillators and cardiac resynchronization therapy devices                                    | Others | aged ≥18 years                   |
| Watanabe 2020  | Impact of Board-Certified Cardiologist Characteristics on Risk of In-Hospital Mortality                                                                                                                                                                 | DPC       | JROAD-DPC                                                                               | Nationwide |                                                       | 2012 | 2014 | Health policy evaluation and utilization  |                                          | Diseases of the circulatory system |                                               | cardiovascular disease                                                                                                   | Others | aged ≥18 years                   |
| Gohbara 2018   | Low Activities of Daily Living Associated With Increased Cardiovascular Disease Mortality in Japan - Analysis of Health Records From a Nationwide Claim-Based Database, JROAD-DPC                                                                       | DPC       | JROAD-DPC                                                                               | Nationwide |                                                       | 2012 | 2014 | Clinical epidemiology, course of diseases |                                          | Diseases of the circulatory system |                                               | acute coronary syndrome, heart failure, or aortic aneurysm/dissection                                                    | Others | aged ≥20 years                   |
| Isogai 2016    | Relationship between hospital volume and major cardiac complications of rotational atherectomy: A nationwide retrospective cohort study in Japan                                                                                                        | DPC       |                                                                                         | Nationwide |                                                       | 2010 | 2013 | Health policy evaluation and utilization  |                                          | Diseases of the circulatory system |                                               | cardiac complications of rotational atherectomy                                                                          | Others | aged ≥20 years                   |
| Isogai 2015    | Serious cardiac complications in coronary spasm provocation tests using acetylcholine or ergonovine: analysis of 21 512 patients from the diagnosis procedure combination database in Japan                                                             | DPC       |                                                                                         | Nationwide |                                                       | 2010 | 2013 | Intervention effect                       |                                          | Diseases of the circulatory system |                                               | Cardiac complications in coronary spasm provocation tests using acetylcholine or ergonovine                              | Others | aged ≥20 years                   |
| Kitazawa 2019  | Risk of coronary artery disease according to glucose abnormality status and prior coronary artery disease in Japanese men                                                                                                                               | JMDC      |                                                                                         | Nationwide |                                                       | 2008 | 2016 | Clinical epidemiology, course of diseases |                                          | Diseases of the circulatory system | Endocrine, nutritional and metabolic diseases | glycemic level, cardiovascular disease                                                                                   | Others | 18-72 years old                  |
| Fujihara 2017  | Impact of body mass index and metabolic phenotypes on coronary artery disease according to glucose tolerance status                                                                                                                                     | JMDC      |                                                                                         | Nationwide |                                                       | 2008 | 2015 | Clinical epidemiology, course of diseases |                                          | Diseases of the circulatory system | Endocrine, nutritional and metabolic diseases | coronary artery disease, glucose tolerance status                                                                        | Others | 18-72 years old                  |
| Hashikata 2011 | Usefulness of a large automated health records database in pharmacoepidemiology                                                                                                                                                                         | MDV       | previous epidemiological survey (Hisayama survey, JIKEI-Heart study, KYOTO-Heart study) | Nationwide | 15 medical facilities                                 | 2006 | 2009 | Research methodology                      |                                          | Diseases of the circulatory system | Endocrine, nutritional and metabolic diseases | cardio-cerebrovascular events, diabetes, dialysis initiation                                                             |        |                                  |
| Teramoto 2016  | Low-density lipoprotein cholesterol levels and lipid-modifying therapy prescription patterns in the real world: An analysis of more than 33,000 high cardiovascular risk patients in Japan                                                              | MDV       |                                                                                         | Nationwide |                                                       | 2013 | 2013 | Medical treatment status                  | Quality of care                          | Diseases of the circulatory system | Endocrine, nutritional and metabolic diseases | acute coronary syndrome, other coronary heart disease, ischemic stroke, peripheral arterial disease or diabetes mellitus | Others | aged ≥20 years                   |
| Sakamoto 2020  | Clinical features and outcomes of nonocclusive mesenteric ischemia after cardiac surgery: a retrospective cohort study                                                                                                                                  | DPC       |                                                                                         | Nationwide |                                                       | 2010 | 2017 | Clinical epidemiology, course of diseases |                                          | Diseases of the circulatory system | Diseases of the digestive system              | Nonocclusive mesenteric ischemia after cardiac surgery                                                                   |        |                                  |
| Kaneko 2020    | Lipid Profile and Subsequent Cardiovascular Disease among Young Adults Aged < 50 Years                                                                                                                                                                  | JMDC      |                                                                                         | Nationwide |                                                       | 2005 | 2018 | Clinical epidemiology, course of diseases |                                          | Diseases of the circulatory system | Endocrine, nutritional and metabolic diseases | lipid profile and cardiovascular disease (CVD) events                                                                    | Others | 20-49 years of age               |
| Kajinami 2019  | Real-World Data to Identify Hypercholesterolemia Patients on Suboptimal Statin Therapy                                                                                                                                                                  | MDV       |                                                                                         | Nationwide |                                                       | 2008 | 2017 | Medical treatment status                  |                                          | Diseases of the circulatory system | Endocrine, nutritional and metabolic diseases | dyslipidemia patients with atherosclerotic cardiovascular disease                                                        | Others | over 20 years                    |
| Seposo 2020    | Short-term effects of air pollution on daily single- and co-morbidity cardiorespiratory outpatient visits                                                                                                                                               | JMDC      |                                                                                         | Nationwide |                                                       | 2013 | 2016 | Clinical epidemiology, course of diseases |                                          | Diseases of the circulatory system | Diseases of the respiratory system            | Cardiovascular-related (I00-I99) and respiratory-related (J00-I99) outpatient clinic visit visits                        |        | all ages                         |
| Sasabuchi 2020 | Clinical Impact of Prescribed Doses of Nutrients for Patients Exclusively Receiving Parenteral Nutrition in Japanese Hospitals: A Retrospective Cohort Study                                                                                            | MDV       |                                                                                         | Nationwide |                                                       | 2009 | 2018 | Intervention effect                       | Quality of care                          | Diseases of the circulatory system |                                               | hospitalized patients who underwent central venous catheter (CVC) insertion                                              | Others | aged ≥18 years                   |
| Toba 2016      | [Selection of a method for detecting cases of severe pneumothorax associated with central venous catheterization using information on fee-for-medical-service ; Potential utilizability of information from Fee-for-medical-service for internal audit] | DPC       | medical records                                                                         | Others     | Medical Hospital, Tokyo Medical and Dental University | 2012 | 2015 | Research methodology                      | Health policy evaluation and utilization | Diseases of the circulatory system |                                               | severe pneumothorax associated with central venous catheterization                                                       |        |                                  |
| Matsuda 2018   | [Big data analysis of medical and nursing care: An analysis of the current state of rehabilitation in patients with ischemic stroke using consolidated data on medical and nursing care]*                                                               | NHI/LSEHS | medical insurance claims and LTC insurance claims data                                  | Others     | A municipality in Western Japan                       | 2011 | 2015 | Medical treatment status                  |                                          | Diseases of the circulatory system |                                               | brain infarction                                                                                                         |        |                                  |
| Matsuda 2018   | [Big data analysis of medical and nursing care: An analysis of the usage of medical and nursing care services of stroke patients using consolidated data on health insurance claims in medical and nursing care]*                                       | NHI/LSEHS | medical insurance claims and LTC insurance claims data                                  | Others     | A municipality in Western Japan                       | 2012 | 2016 | Medical treatment status                  | Health policy evaluation and utilization | Diseases of the circulatory system |                                               | brain infarction                                                                                                         |        |                                  |
| Matsuda 2010   | [DPC based situation analysis of acute rehabilitation care for stroke patients in Japan]                                                                                                                                                                | DPC       | DPC Research Group                                                                      | Nationwide |                                                       | 2008 | 2008 | Medical treatment status                  | Intervention effect                      | Diseases of the circulatory system |                                               | brain infarction                                                                                                         |        |                                  |
| Matsuda 2015   | Analysis of Disease Structure for the Regional Health Care Plan Based on the National Database                                                                                                                                                          | NDB       |                                                                                         | Prefecture | Fukuoka                                               | 2010 | 2010 | Health policy evaluation and utilization  |                                          | Diseases of the circulatory system |                                               | cerebral infarction                                                                                                      |        |                                  |
| Kato 2019      | [[Introduction to health economics for healthcare professionals] Information asymmetry between doctors and patients]*                                                                                                                                   | DPC       |                                                                                         | Nationwide |                                                       | 2010 | 2016 | Quality of care                           | Socioeconomic comparison                 | Diseases of the circulatory system |                                               | cerebral infarction                                                                                                      |        |                                  |
| Fujino 2014    | Impact of regional clinical pathways on the length of stay in hospital among stroke patients in Japan                                                                                                                                                   | DPC       |                                                                                         | Nationwide |                                                       | 2011 | 2012 | Health policy evaluation and utilization  |                                          | Diseases of the circulatory system |                                               | cerebral infarction                                                                                                      |        |                                  |
| Nagayama 2021  | Medical Costs and Readmissions After Intensive Poststroke Rehabilitation: Japanese Claims Data                                                                                                                                                          | JMDC      |                                                                                         | Nationwide |                                                       | 2005 | 2017 | Intervention effect                       | Health economics                         | Diseases of the circulatory system |                                               | cerebrovascular disorder (ICD-10: I60-I69)                                                                               |        |                                  |
| Hatanaka 2016  | [Impact of drinking and smoking habits on cerebrovascular disease risk among male employees]                                                                                                                                                            | Others    | DENSO Health Insurance Society                                                          | Others     | DENSO Health Insurance                                | 2004 | 2013 | Clinical epidemiology, course of diseases |                                          | Diseases of the circulatory system |                                               | cerebrovascular disease                                                                                                  | Others | aged 20-46 years                 |
| Sayama 2015    | Visualization of medical care for cerebrovascular disorders                                                                                                                                                                                             | DPC       | J-ASPECT Study                                                                          | Nationwide |                                                       | 2012 | 2013 | Intervention effect                       | Research methodology                     | Diseases of the circulatory system |                                               | Cerebrovascular Disorders                                                                                                |        |                                  |
| Tanaka 2020    | Proportion and risk factors of cholesterol crystal embolization after cardiovascular procedures: a retrospective national database study                                                                                                                | DPC       |                                                                                         | Nationwide |                                                       | 2010 | 2017 | Clinical epidemiology, course of diseases | Intervention effect                      | Diseases of the circulatory system |                                               | Cholesterol crystal embolization (I749)                                                                                  | Others | aged ≥40 years                   |
| Isogai 2015    | Clinical Practice Patterns in Constrictive Pericarditis Patients With Heart Failure: A Retrospective Cohort Study Using a National Inpatient Database in Japan                                                                                          | DPC       |                                                                                         | Nationwide |                                                       | 2007 | 2013 | Clinical epidemiology, course of diseases | Medical treatment status                 | Diseases of the circulatory system |                                               | Constrictive pericarditis (ICD-10 code I31.1)                                                                            |        |                                  |
| Obbe 2021      | Effect of Early Rehabilitation on Physical Function in Patients Undergoing Coronary Artery Bypass Grafting: A Nationwide Inpatient Database Study                                                                                                       | DPC       |                                                                                         | Nationwide |                                                       | 2010 | 2018 | Intervention effect                       |                                          | Diseases of the circulatory system |                                               | patients who underwent a coronary artery bypass grafting                                                                 | Others | excluded patients aged <18 years |
| Kawamoto 2013  | [The Adherence with Critical Pathways for Angina Pectoris Undergoing Percutaneous Coronary Intervention by Utilizing the Diagnosis Procedure Combination Database]                                                                                      | DPC       | PCI critical pathways data                                                              | Others     | 10 hospitals (NHO)                                    | 2011 | 2011 | Medical treatment status                  | Quality of care                          | Diseases of the circulatory system |                                               | Percutaneous coronary intervention for angina pectoris                                                                   |        |                                  |

|                  |                                                                                                                                                                                                                                                                 |           |                                                                        |              |                                  |      |      |                                           |                                           |                                    |                                                                     |                                                                   |               |                                  |
|------------------|-----------------------------------------------------------------------------------------------------------------------------------------------------------------------------------------------------------------------------------------------------------------|-----------|------------------------------------------------------------------------|--------------|----------------------------------|------|------|-------------------------------------------|-------------------------------------------|------------------------------------|---------------------------------------------------------------------|-------------------------------------------------------------------|---------------|----------------------------------|
| Shimada 2020     | Guideline-Based Medications for Older Adults Discharged after Percutaneous Coronary Intervention in a Suburban City of Japan: A Cohort Study Using Claims Data                                                                                                  | NHI/LSEHS | The National Health Insurance system and Late Elders' Health Insurance | Municipality | Kashiwa City                     | 2012 | 2015 | Quality of care                           |                                           | Diseases of the circulatory system |                                                                     | after discharge following percutaneous coronary intervention      | Older persons | Older Adults                     |
| Nakajima 2020    | Prevalence of myocardial injury requiring percutaneous coronary intervention after acute carbon monoxide poisoning                                                                                                                                              | DPC       |                                                                        | Nationwide   |                                  | 2010 | 2017 | Clinical epidemiology, course of diseases |                                           | Diseases of the circulatory system | Injury, poisoning and certain other consequences of external causes | myocardial injury, acute carbon monoxide poisoning (T58)          |               |                                  |
| Hagiwara 2021    | A comparison of the safety and effectiveness of prasugrel and clopidogrel in younger population undergoing percutaneous coronary intervention: A retrospective study using a Japanese claims database                                                           | JMDC      |                                                                        | Nationwide   |                                  | 2014 | 2018 | Intervention effect                       |                                           | Diseases of the circulatory system |                                                                     | patients undergoing percutaneous coronary intervention            |               |                                  |
| Maeda 2021       | Changes in percutaneous coronary intervention practice in Japan during the COVID-19 outbreak: LIFE Study                                                                                                                                                        | NHI/LSEHS | National Health Insurance and Later-Stage Elderly Healthcare System    | Municipality | Kobe City                        | 2018 | 2020 | COVID-19                                  | Medical treatment status                  | Diseases of the circulatory system |                                                                     | percutaneous coronary intervention                                |               | age categories                   |
| Seki 2019        | Follow-up tests and outcomes for patients undergoing percutaneous coronary intervention: analysis of a Japanese administrative database                                                                                                                         | MDV       |                                                                        | Nationwide   |                                  | 2010 | 2013 | Intervention effect                       |                                           | Diseases of the circulatory system |                                                                     | patients undergoing percutaneous coronary intervention            | Others        | aged ≥18 years                   |
| Ono 2018         | Utilization of Anticoagulant and Antiplatelet Agents Among Patients With Atrial Fibrillation Undergoing Percutaneous Coronary Intervention - Retrospective Cohort Study Using a Nationwide Claims Database in Japan                                             | NDB       |                                                                        | Nationwide   |                                  | 2014 | 2015 | Medical treatment status                  |                                           | Diseases of the circulatory system |                                                                     | Atrial Fibrillation Undergoing Percutaneous Coronary Intervention |               |                                  |
| Ochibe 2020      | Study of the Effect of the Perioperative Administration of Statin on the Prognosis of Percutaneous Coronary Intervention Using the National Health Insurance Claims Database in Japan                                                                           | NDB       |                                                                        | Nationwide   |                                  | 2015 | 2016 | Intervention effect                       |                                           | Diseases of the circulatory system | Others                                                              | statin administration during PCI and cardiovascular events        |               |                                  |
| Pietzsch 2018    | Cost-effectiveness of orbital atherectomy compared to rotational atherectomy in treating patients with severely calcified coronary artery lesions in Japan                                                                                                      | MDV       | Clinical data: published literature                                    | Nationwide   |                                  | 2014 | 2016 | Health economics                          |                                           | Diseases of the circulatory system |                                                                     | severely calcified coronary artery lesions                        |               |                                  |
| Kanazawa 2017    | Underuse of Cardiac Rehabilitation in Workers With Coronary Artery Disease - Claims Database Survey in Japan                                                                                                                                                    | JMDC      |                                                                        | Nationwide   |                                  | 2006 | 2013 | Patient health service utilization        |                                           | Diseases of the circulatory system |                                                                     | coronary artery disease                                           | Others        | aged ≥18 years                   |
| Morishita 2021   | Trends, Treatment Approaches, and In-Hospital Mortality for Acute Coronary Syndrome in Japan During the Coronavirus Disease 2019 Pandemic                                                                                                                       | DPC       | QIP                                                                    | Nationwide   |                                  | 2018 | 2020 | COVID-19                                  | Medical treatment status                  | Diseases of the circulatory system |                                                                     | acute coronary syndrome                                           | Others        | aged 18 years or older           |
| Tanaka 2019      | Treatment strategy modification and its implication on the medical cost of fractional flow reserve-guided percutaneous coronary intervention in Japan                                                                                                           | MDV       | CVIT-DEFER Registry study                                              | Nationwide   |                                  | 2008 |      | Health economics                          | Health policy evaluation and utilization  | Diseases of the circulatory system |                                                                     | stable coronary artery disease                                    |               |                                  |
| Yamada 2015      | Benchmark Analysis and Comparative Study of the Quality Indicators of ACS/AMI with the DPC Data                                                                                                                                                                 | DPC       | MDV: EVE                                                               | Others       | JADECO M: 13 hospitals           | 2012 | 2012 | Quality of care                           |                                           | Diseases of the circulatory system |                                                                     | acute coronary syndrome, acute myocardial infarction              |               |                                  |
| Isogai 2015      | Hospital volume and cardiac complications of endomyocardial biopsy: a retrospective cohort study of 9508 adult patients using a nationwide inpatient database in Japan                                                                                          | DPC       |                                                                        | Nationwide   |                                  | 2010 | 2013 | Health policy evaluation and utilization  |                                           | Diseases of the circulatory system |                                                                     | complications with endomyocardial biopsy                          | Others        | aged ≥20 years                   |
| Ooba 2020        | Frequency of Clinical Monitoring of Serum Concentrations of Digoxin, Potassium, and Creatinine, and Recording of Electrocardiograms in Digoxin-Treated Patients: A Japanese Claims Database Analysis                                                            | JMDC      |                                                                        | Nationwide   |                                  | 2005 | 2014 | Medical treatment status                  | Quality of care                           | Diseases of the circulatory system |                                                                     | digoxin prescription                                              | Others        | aged 20-74 years                 |
| Kitamura 2020    | Patient characteristics, procedure details including catheter devices, and complications of catheter ablation for ventricular tachycardia: a nationwide observational study                                                                                     | DPC       |                                                                        | Nationwide   |                                  | 2010 | 2017 | Clinical epidemiology, course of diseases | Medical treatment status                  | Diseases of the circulatory system |                                                                     | structural heart disease                                          | Others        | aged ≥18 years                   |
| Mizuno 2020      | Impact of facilities accredited by both adult and pediatric cardiology societies on the outcome of patients with adult congenital heart disease                                                                                                                 | DPC       | JROAD-DPC                                                              | Nationwide   | JCS-certified teaching hospitals | 2013 | 2014 | Health policy evaluation and utilization  |                                           | Diseases of the circulatory system |                                                                     | adult congenital heart disease                                    | Others        | aged ≥15 years                   |
| Isogai 2018      | Clinical features and peripartum outcomes in pregnant women with cardiac disease: a nationwide retrospective cohort study in Japan                                                                                                                              | DPC       |                                                                        | Nationwide   |                                  | 2008 | 2014 | Medical treatment status                  | Clinical epidemiology, course of diseases | Diseases of the circulatory system | Pregnancy, childbirth and the puerperium                            | cardiac disease (pregnant women)                                  |               |                                  |
| Wakabayashi 2019 | Impact of Body Mass Index on Activities of Daily Living in Inpatients with Acute Heart Failure                                                                                                                                                                  | JMDC      |                                                                        | Nationwide   |                                  | 2014 | 2017 | Clinical epidemiology, course of diseases |                                           | Diseases of the circulatory system | Endocrine, nutritional and metabolic diseases                       | acute heart failure, overweight and obese                         | Others        | aged 20 year or older            |
| Tamaki 2019      | Characteristics of heart failure patients incurring high medical costs via matching specific health examination results and medical claim data: a cross-sectional study                                                                                         | NHI/LSEHS | NHI                                                                    | Municipality | Hiroshima City                   | 2016 | 2017 | Health economics                          | Clinical epidemiology, course of diseases | Diseases of the circulatory system |                                                                     | heart failure                                                     | Others        | 40 to 74 years                   |
| Sasaki 2017      | Differences between determinants of in-hospital mortality and hospitalisation costs for patients with acute heart failure: a nationwide observational study from Japan                                                                                          | DPC       | QIP                                                                    | Nationwide   |                                  | 2010 | 2011 | Health economics                          |                                           | Diseases of the circulatory system |                                                                     | heart failure (I50.x)                                             | Others        | aged 20 years or older           |
| Nakao 2015       | [Actual use of a vasopressin V2 receptor antagonist in hospitalized heart failure patients : using a Japanese hospital database]                                                                                                                                | MDV       |                                                                        | Nationwide   |                                  | 2011 | 2013 | Medical treatment status                  |                                           | Diseases of the circulatory system |                                                                     | heart failure                                                     | Others        | aged 20 years or older           |
| Matsuda 2019     | [Big data analysis of medical and nursing care: An analysis of the usage of medical and nursing care services of elderly heart failure patients using consolidated data on health insurance claims in medical and nursing care]*                                | NHI/LSEHS | medical insurance claims and LTC insurance claims data                 | Others       | A municipality in Western Japan  | 2012 | 2016 | Clinical epidemiology, course of diseases | Health policy evaluation and utilization  | Diseases of the circulatory system |                                                                     | heart failure                                                     | Older persons | aged 65 years or older           |
| Yagi 2018        | Association Between Early Rehabilitation and Mobility Status in Elderly Inpatients with Heart Failure: A Nationwide Retrospective Cohort Study                                                                                                                  | DPC       |                                                                        | Nationwide   |                                  | 2010 | 2014 | Intervention effect                       |                                           | Diseases of the circulatory system |                                                                     | heart failure                                                     | Others        | excluded aged less than 60 years |
| Matsuda 2018     | [Big data analysis of medical and nursing care: An analysis of factors related to medical and long-term care benefit costs for elderly people requiring long-term care with chronic heart failure using the comprehensive medical and long-term care database]* | NHI/LSEHS | medical insurance claims and LTC insurance claims data                 | Others       | A municipality in Western Japan  | 2011 | 2016 | Health economics                          |                                           | Diseases of the circulatory system |                                                                     | chronic heart failure                                             | Older persons | aged 65 years or older           |
| Matsuda 2018     | [Big data analysis of medical and nursing care: An analysis of factors related to the deaths of elderly people requiring long-term care with chronic heart failure using the comprehensive medical and long-term care database]*                                | NHI/LSEHS | medical insurance claims and LTC insurance claims data                 | Others       | A municipality in Western Japan  | 2008 | 2016 | Clinical epidemiology, course of diseases |                                           | Diseases of the circulatory system |                                                                     | chronic heart failure                                             | Older persons | aged 65 years or older           |
| Abe 2021         | Actual state of "triple therapy" for heart failure patients in eight regions of Japan: An analysis of a nationwide medical claims database                                                                                                                      | MDV       |                                                                        | Nationwide   |                                  | 2017 | 2018 | Medical treatment status                  | Socioeconomic comparison                  | Diseases of the circulatory system |                                                                     | heart failure                                                     | Others        | ≥15 years of age                 |
| Kusunose 2021    | Association between Vitamin D and Heart Failure Mortality in 10,974 Hospitalized Individuals                                                                                                                                                                    | DPC       | JROAD-DPC                                                              | Nationwide   |                                  | 2012 | 2017 | Intervention effect                       |                                           | Diseases of the circulatory system |                                                                     | heart failure                                                     | Others        | ≥20 years of age                 |
| Sasaki 2014      | The relationship between the number of cardiologists and clinical practice patterns in acute heart failure: a cross-sectional observational study                                                                                                               | DPC       | ATTEND registry, JCARE-CARD registry                                   | Nationwide   |                                  | 2010 | 2011 | Quality of care                           | Research methodology                      | Diseases of the circulatory system |                                                                     | acute heart failure                                               | Others        | older than 20 years of age       |



|                |                                                                                                                                                                                                                                          |        |                                        |            |                                                                    |      |      |                                           |                                          |                                    |                                                      |               |                             |
|----------------|------------------------------------------------------------------------------------------------------------------------------------------------------------------------------------------------------------------------------------------|--------|----------------------------------------|------------|--------------------------------------------------------------------|------|------|-------------------------------------------|------------------------------------------|------------------------------------|------------------------------------------------------|---------------|-----------------------------|
| Kaneko 2021    | Impact of hospital volume on clinical outcomes of hospitalized heart failure patients: analysis of a nationwide database including 447,818 patients with heart failure                                                                   | DPC    | DPC Study Group                        | Nationwide |                                                                    | 2010 | 2018 | Health policy evaluation and utilization  |                                          | Diseases of the circulatory system | heart failure (ICD-10 codes I50.0, I50.1, and I50.9) | Others        | aged ≥20 years              |
| Kuragachi 2021 | Temporal trends of a vasopressin V2 receptor antagonist in heart failure using a nationwide database in Japan                                                                                                                            | MDV    |                                        | Nationwide |                                                                    | 2008 | 2018 | Medical treatment status                  |                                          | Diseases of the circulatory system | heart failure (I50, I11.0, I13.0, and I13.2)         |               |                             |
| Itoh 2020      | Reverse J-shaped relationship between body mass index and in-hospital mortality of patients hospitalized for heart failure in Japan                                                                                                      | DPC    |                                        | Nationwide |                                                                    | 2010 | 2018 | Clinical epidemiology, course of diseases |                                          | Diseases of the circulatory system | hospitalized heart failure patients                  | Others        | aged ≥20 years              |
| Kaku 2020      | Impact of Hospital Practice Factors on Mortality in Patients Hospitalized for Heart Failure in Japan - An Analysis of a Large Number of Health Records From a Nationwide Claims-Based Database, the JROAD-DPC                            | DPC    | JROAD-DPC                              | Nationwide | (hospital s agreed to participate in the JROAD-DPC database study) | 2012 | 2014 | Health policy evaluation and utilization  |                                          | Diseases of the circulatory system | hospitalized heart failure patients                  |               |                             |
| Kaneko 2020    | Characteristics and Outcomes of Super-Elderly Patients (Aged >=90 Years) Hospitalized for Heart Failure - Analysis of a Nationwide Inpatient Database                                                                                    | DPC    |                                        | Nationwide |                                                                    | 2010 | 2018 | Clinical epidemiology, course of diseases |                                          | Diseases of the circulatory system | super-elderly heart failure                          | Others        | aged ≥20 years              |
| Nagai 2019     | Effect of intravenous carperitide versus nitrates as first-line vasodilators on in-hospital outcomes in hospitalized patients with acute heart failure: Insight from a nationwide claim-based database                                   | DPC    | JROAD-DPC                              | Nationwide |                                                                    | 2012 | 2014 | Intervention effect                       |                                          | Diseases of the circulatory system | acute heart failure                                  | Others        | aged ≥20 years              |
| Kunisawa 2019  | Regional comparison of health care quality using DPC data*                                                                                                                                                                               | DPC    |                                        | Nationwide |                                                                    | 2011 | 2016 | Quality of care                           | Socioeconomic comparison                 | Diseases of the circulatory system | acute heart failure, stroke                          |               |                             |
| Chen 2021      | Disease Management and Outcomes in Patients Hospitalized for Acute Heart Failure in Japan                                                                                                                                                | MDV    |                                        | Nationwide |                                                                    | 2013 | 2017 | Medical treatment status                  |                                          | Diseases of the circulatory system | acute heart failure                                  | Others        | Adult patients              |
| Ide 2021       | Clinical Characteristics and Outcomes of Hospitalized Patients With Heart Failure From the Large-Scale Japanese Registry Of Acute Decompensated Heart Failure (JROADHF)                                                                  | DPC    | JROAD                                  | Nationwide |                                                                    | 2013 | 2017 | Clinical epidemiology, course of diseases |                                          | Diseases of the circulatory system | heart failure                                        |               |                             |
| Kaneko 2021    | Early Initiation of Feeding and In-Hospital Outcomes in Patients Hospitalized for Acute Heart Failure                                                                                                                                    | DPC    |                                        | Nationwide |                                                                    | 2010 | 2018 | Intervention effect                       |                                          | Diseases of the circulatory system | acute heart failure                                  | Others        | aged ≥20 years              |
| Yasui 2021     | Association between ambulance use and hospitalization costs among heart failure patients                                                                                                                                                 | DPC    |                                        | Nationwide |                                                                    | 2014 | 2015 | Health economics                          |                                          | Diseases of the circulatory system | heart failure                                        |               |                             |
| Itoh 2020      | Serial Changes in Clinical Presentations and Outcomes of 5,740 Patients Requiring Repeated Hospital Admissions (Four or More Times) due to Worsened Heart Failure                                                                        | DPC    |                                        | Nationwide |                                                                    | 2010 | 2018 | Clinical epidemiology, course of diseases |                                          | Diseases of the circulatory system | heart failure                                        | Others        | aged ≥20 years              |
| Kaneko 2020    | Association between the number of hospital admissions and in-hospital outcomes in patients with heart failure                                                                                                                            | DPC    |                                        | Nationwide |                                                                    | 2010 | 2018 | Clinical epidemiology, course of diseases | Medical treatment status                 | Diseases of the circulatory system | heart failure                                        | Others        | aged ≥20 years              |
| Konishi 2020   | Impact of population density on mortality in patients hospitalized for heart failure - JROAD-DPC Registry Analysis                                                                                                                       | DPC    | J-ROAD-DPC                             | Nationwide |                                                                    | 2012 | 2015 | Clinical epidemiology, course of diseases | Socioeconomic comparison                 | Diseases of the circulatory system | heart failure                                        | Others        | aged ≥20 years              |
| Mitani 2020    | In-hospital resource utilization, worsening heart failure, and factors associated with length of hospital stay in patients with hospitalized heart failure: A Japanese database cohort study                                             | MDV    |                                        | Nationwide |                                                                    | 2012 | 2016 | Clinical epidemiology, course of diseases | Medical treatment status                 | Diseases of the circulatory system | heart failure                                        | Others        | aged ≥20 years              |
| Kanaoka 2019   | Hospitalization Costs for Patients With Acute Congestive Heart Failure in Japan                                                                                                                                                          | DPC    | J-ROAD                                 | Nationwide |                                                                    | 2012 | 2015 | Health economics                          |                                          | Diseases of the circulatory system | Acute Congestive Heart Failure                       | Others        | aged ≥20 years              |
| Kanaoka 2019   | Number of Cardiologists per Cardiovascular Beds and In-Hospital Mortality for Acute Heart Failure: A Nationwide Study in Japan                                                                                                           | DPC    | J-ROAD                                 | Nationwide |                                                                    | 2012 | 2014 | Health policy evaluation and utilization  |                                          | Diseases of the circulatory system | Acute Heart Failure                                  | Others        | aged ≥20 years              |
| Suzuki 2019    | Effectiveness of Early Rehabilitation for Acute Heart Failure: A RETROSPECTIVE COHORT STUDY                                                                                                                                              | JMDC   |                                        | Nationwide |                                                                    | 2014 | 2017 | Intervention effect                       |                                          | Diseases of the circulatory system | Acute Heart Failure                                  | Older persons | aged ≥65 years              |
| Mizuno 2017    | The impact of carperitide usage on the cost of hospitalization and outcome in patients with acute heart failure: High value care vs. low value care campaign in Japan                                                                    | DPC    |                                        | Nationwide |                                                                    | 2014 | 2015 | Intervention effect                       | Health economics                         | Diseases of the circulatory system | acute heart failure                                  | Others        | aged ≥18 years              |
| Aizawa 2015    | Factors associated with 30-day readmission of patients with heart failure from a Japanese administrative database                                                                                                                        | DPC    |                                        | Nationwide |                                                                    | 2012 | 2013 | Clinical epidemiology, course of diseases |                                          | Diseases of the circulatory system | Heart failure                                        |               | age categories              |
| Akazawa 2013   | Economic impact of switching to fixed-dose combination therapy for Japanese hypertensive patients: a retrospective cost analysis                                                                                                         | Others | Nihon Chouzai pharmacy claims database | Prefecture | Tokyo                                                              | 2010 | 2011 | Health economics                          | Health policy evaluation and utilization | Diseases of the circulatory system | hypertensive patients                                |               |                             |
| Ishida 2019    | Treatment patterns of antihypertensive fixed-dose combinations according to age and number of agents prescribed: Retrospective analysis using a Japanese claims database                                                                 | MDV    |                                        | Nationwide |                                                                    | 2014 | 2015 | Medical treatment status                  |                                          | Diseases of the circulatory system | hypertension                                         |               |                             |
| Ishida 2018    | Current use of antihypertensive drugs in Japanese patients with hypertension: Analysis by age group                                                                                                                                      | MDV    |                                        | Nationwide |                                                                    | 2013 | 2015 | Medical treatment status                  | Socioeconomic comparison                 | Diseases of the circulatory system | hypertension                                         |               | age group                   |
| Kuriyama 2015  | Predicting failure to follow-up screened high blood pressure in Japan: a cohort study                                                                                                                                                    | JMDC   |                                        | Nationwide |                                                                    | 2005 | 2011 | Patient health service utilization        |                                          | Diseases of the circulatory system | hypertension                                         | Others        | aged ≥20 years              |
| Nishimura 2020 | Adherence to antihypertensive medication and its predictors among non-elderly adults in Japan                                                                                                                                            | JMDC   |                                        | Nationwide |                                                                    | 2014 | 2016 | Patient health service utilization        |                                          | Diseases of the circulatory system | hypertensive patients                                | Others        | 30-74 years of age          |
| Fukushima 2019 | Impact of Hypertension on Hospitalizations for Cardiovascular Diseases in a Worksite Population: An Epidemiologic Study Using Claims Data for Workers                                                                                    | JMDC   |                                        | Nationwide |                                                                    | 2008 | 2015 | Clinical epidemiology, course of diseases | Intervention effect                      | Diseases of the circulatory system | Cardiovascular Diseases, hypertension                | Others        | aged 40-64 years            |
| Ishida 2019    | Current prescription status of antihypertensive drugs in Japanese patients with hypertension: Analysis by type of comorbidities                                                                                                          | MDV    |                                        | Nationwide |                                                                    | 2014 | 2015 | Quality of care                           |                                          | Diseases of the circulatory system | hypertension                                         | Others        | aged ≥20 years              |
| Takahashi 2017 | [Antihypertensive Drug Use for Resistant Hypertension in Real-World Settings at Hospitals with Diagnosis Procedure Combination (DPC) System in Japan]                                                                                    | MDV    | MDV                                    | Nationwide |                                                                    | 2013 | 2013 | Medical treatment status                  |                                          | Diseases of the circulatory system | Resistant Hypertension                               | Others        | aged ≥36 years              |
| Hiroi 2016     | Analysis of second- and third-line antihypertensive treatments after initial therapy with an angiotensin II receptor blocker using real-world Japanese data                                                                              | Others | JMDC and MDV                           | Nationwide |                                                                    | 2008 | 2015 | Medical treatment status                  |                                          | Diseases of the circulatory system | hypertensive Japanese patients                       |               |                             |
| Hiragi 2021    | Association between the size of healthcare facilities and the intensity of hypertension therapy: a cross-sectional comparison of prescription data from insurance claims data                                                            | NDB    | Sampling data                          | Nationwide |                                                                    | 2014 | 2014 | Medical treatment status                  | Health policy evaluation and utilization | Diseases of the circulatory system | antihypertensive therapies                           |               |                             |
| Kaneko 2020    | Association of Isolated Diastolic Hypertension Based on the Cutoff Value in the 2017 American College of Cardiology/American Heart Association Blood Pressure Guidelines With Subsequent Cardiovascular Events in the General Population | JMDC   |                                        | Nationwide |                                                                    | 2005 | 2018 | Clinical epidemiology, course of diseases | Intervention effect                      | Diseases of the circulatory system | isolated diastolic hypertension                      | Others        | aged ≥20 years              |
| Ishida 2019    | Treatment patterns and adherence to antihypertensive combination therapies in Japan using a claims database                                                                                                                              | MDV    |                                        | Nationwide |                                                                    | 2014 | 2016 | Medical treatment status                  | Patient health service utilization       | Diseases of the circulatory system | hypertension                                         | Others        | aged ≥20 years              |
| Ohishi 2019    | Analysis of antihypertensive treatment using real-world Japanese data: the retrospective study of antihypertensives for lowering blood pressure (REAL) study                                                                             | Others | JMDC, MDV                              | Nationwide |                                                                    | 2008 | 2016 | Medical treatment status                  |                                          | Diseases of the circulatory system | hypertension                                         |               |                             |
| Saito 2016     | Medication-taking behavior in hypertensive patients with a single-tablet, fixed-dose combination in Japan                                                                                                                                | Others | Jamm Net (Study 2)                     | Nationwide |                                                                    | 2013 | 2014 | Patient health service utilization        |                                          | Diseases of the circulatory system | hypertensive patients                                | Others        | aged less than 75 years old |

|                |                                                                                                                                                                                                   |           |                                                                                               |            |                                                                           |      |      |                                           |                                           |                                    |                                                         |                                                                  |                 |                 |
|----------------|---------------------------------------------------------------------------------------------------------------------------------------------------------------------------------------------------|-----------|-----------------------------------------------------------------------------------------------|------------|---------------------------------------------------------------------------|------|------|-------------------------------------------|-------------------------------------------|------------------------------------|---------------------------------------------------------|------------------------------------------------------------------|-----------------|-----------------|
| Shima 2015     | [Evaluation of Concomitant Drug Use Among Patients Prescribed Amlodipine 10 mg Daily]                                                                                                             | Others    | MinaCare                                                                                      | Nationwide |                                                                           | 2010 | 2014 | Medical treatment status                  |                                           | Diseases of the circulatory system | hypertension                                            |                                                                  |                 |                 |
| Suzuki 2015    | [Patients' Adherence of Fixed-Dose Single Pill of Amlodipine/Atorvastatin in Comparison with Separate-Pill Amlodipine + Rosuvastatin Combination Therapy (Retrospective Cohort Study)]            | Others    | Iyaku-Joho-Kenkyujo                                                                           | Nationwide |                                                                           | 2011 | 2013 | Patient health service utilization        |                                           | Diseases of the circulatory system | anti-hypertensive pill                                  |                                                                  |                 |                 |
| Kohro 2013     | The impact of a change in hypertension management guidelines on diuretic use in Japan: trends in antihypertensive drug prescriptions from 2005 to 2011                                            | JMDC      |                                                                                               | Nationwide |                                                                           | 2005 | 2011 | Medical treatment status                  | Health policy evaluation and utilization  | Diseases of the circulatory system | hypertension                                            | Others                                                           | aged ≥20 years  |                 |
| Kiriya 2021    | Surgical treatment for infective endocarditis in the ageing society: a nationwide retrospective study in Japan                                                                                    | DPC       |                                                                                               | Nationwide |                                                                           | 2010 | 2018 | Clinical epidemiology, course of diseases | Medical treatment status                  | Diseases of the circulatory system | infective endocarditis                                  | Others                                                           | aged ≥20 years  |                 |
| Ohbe 2021      | Increased risk of infective endocarditis after traumatic skin wound                                                                                                                               | Others    | JMDC, National Health Insurance and Kumamoto database (Later-Stage Elderly Healthcare System) | Others     | JMDC and Kumamoto database                                                | 2012 | 2018 | Intervention effect                       |                                           | Diseases of the circulatory system | infective endocarditis (133)                            | Others                                                           | aged ≥20 years  |                 |
| Kurogi 2018    | Comparing intracerebral hemorrhages associated with direct oral anticoagulants or warfarin                                                                                                        | DPC       | J-ASPECT Study                                                                                | Nationwide |                                                                           | 2010 | 2015 | Clinical epidemiology, course of diseases | Intervention effect                       | Diseases of the circulatory system | intracerebral hemorrhages (161.0-9, 162.0-1, and 162.9) |                                                                  |                 |                 |
| Matsuda 2018   | [Big data analysis of medical and nursing care: An analysis of the current status of PCI implementation for elderly people with ischemic heart disease requiring long-term care]*                 | NHI/LSEHS | medical insurance claims and LTC insurance claims data                                        | Others     | A municipality in Western Japan                                           | 2011 | 2017 | Medical treatment status                  | Quality of care                           | Diseases of the circulatory system | ischemic heart disease                                  | Older persons                                                    | Older People    |                 |
| Hatanaka 2015  | [Risk factors for ischemic heart disease in males in the prime of life: An eight-year follow-up study]                                                                                            | Others    | DENSO Health Insurance Society                                                                | Others     | DENSO Health Insurance                                                    | 2003 | 2011 | Clinical epidemiology, course of diseases |                                           | Diseases of the circulatory system | ischemic heart disease                                  | Others                                                           | 30-55 years old |                 |
| Huang 2012     | Impact of hypertension, diabetes and dyslipidemia on ischemic heart disease among Japanese: A case-control study based on National Health Insurance medical claims                                | NHI/LSEHS | NHI                                                                                           | Prefecture | Nagasaki                                                                  | 2010 | 2010 | Clinical epidemiology, course of diseases |                                           | Diseases of the circulatory system | Endocrine, nutritional and metabolic diseases           | Ischemic heart disease (hypertension, diabetes and dyslipidemia) | Others          | 40-79 years old |
| Tsujita 2020   | Upper gastrointestinal bleeding in Japanese patients with ischemic heart disease receiving vonoprazan or a proton pump inhibitor with multiple antithrombotic agents: A nationwide database study | MDV       |                                                                                               | Nationwide |                                                                           | 2016 | 2017 | Intervention effect                       |                                           | Diseases of the circulatory system | ischemic heart disease (I20-I25)                        |                                                                  |                 |                 |
| Fujita 2017    | [Evaluation of Secondary Healthcare Area on ischemic heart diseases from data of beneficiaries of Fukuoka Branch of National Health Insurance Association]                                        | JHIA      | Fukuoka Branch                                                                                | Prefecture | Fukuoka                                                                   | 2014 | 2015 | Medical treatment status                  | Health policy evaluation and utilization  | Diseases of the circulatory system | ischemic heart diseases                                 |                                                                  |                 |                 |
| Fujita 2017    | [A study on hospitalization behavior and setting of secondary medical care zones by insurer for ischemic heart disease using data on health insurance claims]*                                    | NHI/LSEHS | National Health Insurance and Later-Stage Elderly Healthcare System                           | Prefecture | Fukuoka                                                                   | 2014 | 2015 | Medical treatment status                  | Health policy evaluation and utilization  | Diseases of the circulatory system | ischemic heart diseases                                 |                                                                  |                 |                 |
| Chikuda 2014   | Ischemic stroke after cervical spine injury: analysis of 11,005 patients using the Japanese Diagnosis Procedure Combination database                                                              | DPC       |                                                                                               | Nationwide |                                                                           | 2007 | 2010 | Clinical epidemiology, course of diseases |                                           | Diseases of the circulatory system | ischemic stroke                                         |                                                                  |                 |                 |
| Yamashita 2020 | Comparison of hospital length of stay of acute ischemic stroke patients with non-valvular atrial fibrillation started on rivaroxaban or warfarin treatment during hospitalization                 | MDV       |                                                                                               | Nationwide |                                                                           | 2012 | 2015 | Intervention effect                       |                                           | Diseases of the circulatory system | acute ischemic stroke                                   | Others                                                           | ≥20 year of age |                 |
| Miyamoto 2020  | Expanded Indication for Recombinant Tissue Plasminogen Activator from 3 to 4.5 h after Onset of Stroke in Japan                                                                                   | DPC       |                                                                                               | Nationwide |                                                                           | 2010 | 2014 | Intervention effect                       |                                           | Diseases of the circulatory system | acute ischemic stroke                                   | Others                                                           | aged ≥18 years  |                 |
| Kada 2019      | National trends in outcomes of ischemic stroke and prognostic influence of stroke center capability in Japan, 2010-2016                                                                           | DPC       | J-ASPECT (Japan Neurosurgical Society and Japan Stroke Society)                               | Nationwide |                                                                           | 2010 | 2016 | Clinical epidemiology, course of diseases | Health policy evaluation and utilization  | Diseases of the circulatory system | acute ischemic stroke                                   |                                                                  |                 |                 |
| Otsubo 2015    | Regional variations in in-hospital mortality, care processes, and spending in acute ischemic stroke patients in Japan                                                                             | NDB       | National Health Insurance beneficiaries and Long-Life Medical Care System beneficiaries       | Prefecture | 8 prefectures (Fuku, Mie, Shiga, Kyoto, Osaka, Nara, Wakayama, and Hyogo) | 2010 | 2012 | Medical treatment status                  | Socioeconomic comparison                  | Diseases of the circulatory system | ischemic stroke                                         | Older persons                                                    | aged ≥65 years  |                 |
| Lee 2013       | Derivation and validation of in-hospital mortality prediction models in ischaemic stroke patients using administrative data                                                                       | DPC       | QIP                                                                                           | Nationwide | 176 hospitals                                                             | 2010 | 2011 | Prediction model                          | Clinical epidemiology, course of diseases | Diseases of the circulatory system | ischaemic stroke                                        | Others                                                           | aged ≥18 years  |                 |
| Maeda 2021     | Risk of Stroke in Atrial Fibrillation According to Sex in Patients Aged Younger Than 75 Years: A Large-Scale, Observational Study Using Real-World Data                                           | JMDC      |                                                                                               | Nationwide |                                                                           | 2005 | 2017 | Clinical epidemiology, course of diseases |                                           | Diseases of the circulatory system | ischaemic stroke in patients with atrial fibrillation   | Others                                                           | aged ≥20 years  |                 |
| Yagi 2017      | Impact of Rehabilitation on Outcomes in Patients With Ischemic Stroke: A Nationwide Retrospective Cohort Study in Japan                                                                           | DPC       |                                                                                               | Nationwide |                                                                           | 2012 | 2014 | Intervention effect                       |                                           | Diseases of the circulatory system | Ischemic Stroke                                         | Others                                                           | aged >20 years  |                 |
| Iwamoto 2015   | Effectiveness of Hospital Functions for Acute Ischemic Stroke Treatment on In-Hospital Mortality: Results From a Nationwide Survey in Japan                                                       | DPC       |                                                                                               | Nationwide |                                                                           | 2010 | 2010 | Health policy evaluation and utilization  |                                           | Diseases of the circulatory system | acute ischemic stroke                                   | Others                                                           | aged ≥20 years  |                 |
| Wada 2015      | Relationship between hospital volume and early outcomes in acute ischemic stroke patients treated with recombinant tissue plasminogen activator                                                   | DPC       |                                                                                               | Nationwide |                                                                           | 2010 | 2012 | Health policy evaluation and utilization  |                                           | Diseases of the circulatory system | ischemic stroke                                         |                                                                  |                 |                 |
| Iihara 2014    | Effects of comprehensive stroke care capabilities on in-hospital mortality of patients with ischemic and hemorrhagic stroke: J-ASPECT study                                                       | DPC       | J-ASPECT Study                                                                                | Nationwide |                                                                           | 2010 | 2011 | Health policy evaluation and utilization  |                                           | Diseases of the circulatory system | Ischemic and Hemorrhagic Stroke                         |                                                                  |                 |                 |
| Kunisawa 2013  | Association of geographical factors with administration of tissue plasminogen activator for acute ischemic stroke                                                                                 | DPC       |                                                                                               | Nationwide |                                                                           | 2010 | 2012 | Socioeconomic comparison                  | Medical treatment status                  | Diseases of the circulatory system | Acute ischemic stroke                                   | Others                                                           | aged ≥18 years  |                 |
| Wada 2014      | Effects of edaravone on early outcomes in acute ischemic stroke patients treated with recombinant tissue plasminogen activator                                                                    | DPC       |                                                                                               | Nationwide |                                                                           | 2010 | 2012 | Intervention effect                       |                                           | Diseases of the circulatory system | acute ischemic stroke                                   |                                                                  |                 |                 |
| Usui 2019      | Association of dialysis with in-hospital disability progression and mortality in community-onset stroke                                                                                           | DPC       |                                                                                               | Nationwide |                                                                           | 2010 | 2013 | Clinical epidemiology, course of diseases | Intervention effect                       | Diseases of the circulatory system | Diseases of the genitourinary system                    | stroke, dialysis                                                 | Others          | aged ≥20 years  |

|                |                                                                                                                                                                                                                         |           |                                                                                    |            |                                           |      |                                           |                                           |                                          |                                                              |                                                                                      |                                                                             |                             |                        |
|----------------|-------------------------------------------------------------------------------------------------------------------------------------------------------------------------------------------------------------------------|-----------|------------------------------------------------------------------------------------|------------|-------------------------------------------|------|-------------------------------------------|-------------------------------------------|------------------------------------------|--------------------------------------------------------------|--------------------------------------------------------------------------------------|-----------------------------------------------------------------------------|-----------------------------|------------------------|
| Maeda 2020     | Increased Incident Ischemic Stroke Risk in Advanced Kidney Disease: A Large-Scale Real-World Data Study                                                                                                                 | JMDC      |                                                                                    | Nationwide | 2005                                      | 2017 | Clinical epidemiology, course of diseases | Intervention effect                       | Diseases of the circulatory system       | Diseases of the genitourinary system                         | Ischemic Stroke, Advanced Kidney Disease                                             | Others                                                                      | aged ≥20 years              |                        |
| Ren 2021       | Measuring quality of care for ischemic stroke treated with acute reperfusion therapy in Japan — the close the gap-stroke —                                                                                              | DPC       | J-ASPECT study                                                                     | Nationwide | 2013                                      | 2015 | Quality of care                           |                                           | Diseases of the circulatory system       | Diseases of the nervous system                               | acute ischemic stroke (ICD-10 codes: I63.0–I63.9) or transient ischemic attack (G45) | Others                                                                      | aged ≥18 years              |                        |
| Naganuma 2016  | Clinical features of isolated dissections of abdominal aortic branches                                                                                                                                                  | DPC       |                                                                                    | Nationwide | 2010                                      | 2013 | Clinical epidemiology, course of diseases |                                           | Diseases of the circulatory system       |                                                              | isolated dissections of abdominal aortic branches                                    |                                                                             |                             |                        |
| Mizuno 2018    | Real clinical management of patients with isolated superior mesenteric artery dissection in Japan                                                                                                                       | DPC       |                                                                                    | Nationwide | 141 hospitals                             | 2015 | 2015                                      | Clinical epidemiology, course of diseases | Medical treatment status                 | Diseases of the circulatory system                           |                                                                                      | isolated superior mesenteric artery dissection                              |                             |                        |
| Otsubo 2012    | [Readmission rate for health care delivery system assessment]                                                                                                                                                           | NHI/LSEHS | National Health Insurance and Later-Stage Elderly Healthcare System                | Prefecture | Kyoto                                     | 2009 | 2010                                      | Research methodology                      | Health policy evaluation and utilization | Diseases of the circulatory system                           |                                                                                      | acute myocardial infarction                                                 |                             |                        |
| Kanazawa 2020  | In-hospital cardiac rehabilitation and clinical outcomes in patients with acute myocardial infarction after percutaneous coronary intervention: a retrospective cohort study                                            | DPC       |                                                                                    | Nationwide | 2012                                      | 2014 | Intervention effect                       |                                           | Diseases of the circulatory system       |                                                              | acute myocardial infarction                                                          | Others                                                                      | ≥18 years of age            |                        |
| Miki 2019      | Association of intensive care unit admission and mortality in patients with acute myocardial infarction                                                                                                                 | MDV       |                                                                                    | Nationwide | 2014                                      | 2016 | Intervention effect                       |                                           | Diseases of the circulatory system       |                                                              | acute myocardial infarction                                                          |                                                                             | age categories              |                        |
| Kanaoka 2018   | Number of Board-Certified Cardiologists and Acute Myocardial Infarction-Related Mortality in Japan - JROAD and JROAD-DPC Registry Analysis                                                                              | DPC       | JROAD-DPC                                                                          | Nationwide | 2012                                      | 2014 | Health policy evaluation and utilization  |                                           | Diseases of the circulatory system       |                                                              | acute myocardial infarction                                                          | Others                                                                      | aged ≥20 years              |                        |
| Isogai 2015    | Effect of weekend admission for acute myocardial infarction on in-hospital mortality: a retrospective cohort study                                                                                                      | DPC       | DPC Study Group                                                                    | Nationwide | 2010                                      | 2013 | Health policy evaluation and utilization  |                                           | Diseases of the circulatory system       |                                                              | acute myocardial infarction                                                          | Others                                                                      | aged ≥20 years              |                        |
| Matoba 2021    | Institutional Characteristics and Prognosis of Acute Myocardial Infarction With Cardiogenic Shock in Japan - Analysis From the JROAD/JROAD-DPC Database                                                                 | DPC       | J-ROAD-DPC                                                                         | Nationwide | 2012                                      | 2016 | Clinical epidemiology, course of diseases | Health policy evaluation and utilization  | Diseases of the circulatory system       |                                                              | Acute Myocardial Infarction                                                          |                                                                             |                             |                        |
| Nakao 2019     | Prescription Rates of Guideline-Directed Medications Are Associated With In-Hospital Mortality Among Japanese Patients With Acute Myocardial Infarction: A Report From JROAD - DPC Study                                | DPC       | JROAD-DPC                                                                          | Nationwide | 2012                                      | 2013 | Intervention effect                       | Quality of care                           | Diseases of the circulatory system       |                                                              | Acute Myocardial Infarction                                                          | Others                                                                      | aged ≥18 years              |                        |
| Uemura 2019    | Primary Percutaneous Coronary Intervention in Elderly Patients With Acute Myocardial Infarction - An Analysis From a Japanese Nationwide Claim-Based Database                                                           | DPC       | JROAD-DPC                                                                          | Nationwide | 2012                                      | 2015 | Intervention effect                       | Medical treatment status                  | Diseases of the circulatory system       |                                                              | Acute Myocardial Infarction                                                          |                                                                             |                             |                        |
| Ando 2018      | Positive predictive value of ICD-10 codes for acute myocardial infarction in Japan: a validation study at a single center                                                                                               | Others    | DPC and non-DPC claims data, electronic medical records                            | Others     | a large tertiary-care university hospital | 2009 | 2011                                      | Research methodology                      |                                          | Diseases of the circulatory system                           |                                                                                      | acute myocardial infarction                                                 |                             |                        |
| Isogai 2016    | Atrial natriuretic peptide therapy and in-hospital mortality in acute myocardial infarction patients undergoing percutaneous coronary intervention                                                                      | DPC       |                                                                                    | Nationwide | 2010                                      | 2014 | Intervention effect                       |                                           | Diseases of the circulatory system       |                                                              | acute myocardial infarction                                                          | Others                                                                      | aged ≥20 years              |                        |
| Yasuda 2016    | The current status of cardiovascular medicine in Japan - Analysis of a large number of health records from a nationwide claim-based database, JROAD-DPC                                                                 | DPC       | JROAD-DPC                                                                          | Nationwide | 2012                                      | 2013 | Clinical epidemiology, course of diseases | Medical treatment status                  | Diseases of the circulatory system       |                                                              | acute myocardial infarction and heart failure                                        |                                                                             |                             |                        |
| Nakai 2021     | Validation of Acute Myocardial Infarction and Heart Failure Diagnoses in Hospitalized Patients With the Nationwide Claim-Based JROAD-DPC Database                                                                       | DPC       | JROAD-DPC, clinical dataset (from chart review)                                    | Others     | 5 institutions                            | 2012 | 2014                                      | Research methodology                      |                                          | Diseases of the circulatory system                           |                                                                                      | Acute Myocardial Infarction and Heart Failure (I21.0-I21.9 and I50.0-I50.9) |                             |                        |
| Kikuchi 2021   | Database Analysis on the Relationships Between Nonsteroidal Anti-inflammatory Drug Treatment Variables and Incidence of Acute Myocardial Infarction in Japanese Patients with Osteoarthritis and Chronic Low Back Pain  | JMDC      |                                                                                    | Nationwide | 2009                                      | 2018 | Intervention effect                       |                                           | Diseases of the circulatory system       | Diseases of the musculoskeletal system and connective tissue | acute myocardial infarction, osteoarthritis and chronic low back pain                | Others                                                                      | ≥18 years of age            |                        |
| Isogai 2017    | Treatments and in-hospital mortality in acute myocardial infarction patients with rheumatoid arthritis: a nationwide retrospective cohort study in Japan                                                                | DPC       |                                                                                    | Nationwide | 2010                                      | 2014 | Medical treatment status                  | Clinical epidemiology, course of diseases | Diseases of the circulatory system       | Diseases of the musculoskeletal system and connective tissue | acute myocardial infarction, rheumatoid arthritis                                    | Others                                                                      | aged ≥20 years              |                        |
| Ohki 2021      | Pediatric Fulminant Myocarditis in Japan: A Retrospective Nationwide Database Study of Hospital Volume, Management Practices, and Mortality                                                                             | DPC       |                                                                                    | Nationwide | 2012                                      | 2018 | Medical treatment status                  | Clinical epidemiology, course of diseases | Diseases of the circulatory system       |                                                              | acute myocarditis                                                                    | Children                                                                    | less than 18 years old      |                        |
| Isogai 2015    | Effect of intravenous immunoglobulin for fulminant myocarditis on in-hospital mortality: propensity score analysis                                                                                                      | DPC       | DPC Study Group                                                                    | Nationwide | 2007                                      | 2013 | Intervention effect                       |                                           | Diseases of the circulatory system       |                                                              | Fulminant myocarditis                                                                | Others                                                                      | aged ≥16 years              |                        |
| Hosaka 2014    | Clinical and economic burden in patients with diagnosis of peripheral arterial disease in a claims database in Japan                                                                                                    | JMDC      |                                                                                    | Nationwide | 2005                                      | 2011 | Clinical epidemiology, course of diseases | Health economics                          | Diseases of the circulatory system       |                                                              | peripheral arterial disease                                                          | Others                                                                      | 45-64 years old             |                        |
| Isogai 2015    | Effectiveness of inferior vena cava filters on mortality as an adjuvant to antithrombotic therapy                                                                                                                       | DPC       |                                                                                    | Nationwide | 2007                                      | 2013 | Intervention effect                       |                                           | Diseases of the circulatory system       |                                                              | pulmonary embolism (ICD-10 codes: I26.0, I26.9)                                      |                                                                             |                             |                        |
| Makito 2021    | Spinal epidural hematoma and abscess after neuraxial anesthesia: a historical cohort study using the Japanese Diagnosis Procedure Combination database                                                                  | DPC       |                                                                                    | Nationwide | 2010                                      | 2017 | Intervention effect                       |                                           | Diseases of the circulatory system       |                                                              | Spinal epidural hematoma                                                             | Others                                                                      | aged ≥20 years              |                        |
| Kakizaki 2018  | [Study on the probability of incident stroke and acute myocardial infarction using DPC data]                                                                                                                            | DPC       | DPC data, Disease Registries for JPHC Research (comparison of the number of cases) | Others     | a single center                           | 2011 | 2012                                      | Research methodology                      |                                          | Diseases of the circulatory system                           |                                                                                      | stroke, acute myocardial infarction                                         | Others                      | aged ≥40, <70 years    |
| Kumazawa 2019  | Association between Angiotensin-Converting Enzyme Inhibitors and Post-Stroke Aspiration Pneumonia                                                                                                                       | DPC       |                                                                                    | Nationwide | 2010                                      | 2016 | Intervention effect                       |                                           | Diseases of the circulatory system       | Diseases of the respiratory system                           | post-stroke (ICD-10 codes: I60-I63) aspiration pneumonia (J13-J18 and J69)           | Others                                                                      | aged ≥50 years              |                        |
| Momosaki 2016  | Proton Pump Inhibitors versus Histamine-2 Receptor Antagonists and Risk of Pneumonia in Patients with Acute Stroke                                                                                                      | DPC       |                                                                                    | Nationwide | 2010                                      | 2013 | Intervention effect                       |                                           | Diseases of the circulatory system       | Diseases of the respiratory system                           | occurrence of pneumonia in acute stroke patients                                     |                                                                             |                             |                        |
| Sakai 2013     | How Does the Accuracy of ICD Coding Influence for Resource Consumption Under the Casemix Based Evaluation                                                                                                               | DPC       |                                                                                    | Nationwide | 2008                                      | 2008 | Health economics                          | Health policy evaluation and utilization  | Diseases of the circulatory system       |                                                              | stroke cases                                                                         |                                                                             |                             |                        |
| Hosoi 2020     | Association between comprehensive geriatric assessment and short-term outcomes among older adult patients with stroke: A nationwide retrospective cohort study using propensity score and instrumental variable methods | DPC       |                                                                                    | Nationwide | 2014                                      | 2017 | Intervention effect                       |                                           | Diseases of the circulatory system       |                                                              | stroke (ICD-10 code: I63)                                                            | Older persons                                                               | aged 65 or older            |                        |
| Nishi 2017     | Impact of financial incentives for inter-provider care coordination on health-care resource utilization among elderly acute stroke patients                                                                             | NHI/LSEHS | claims data of the DPC/PPDS                                                        | Prefecture | Fukuoka Prefecture                        | 2010 | 2015                                      | Health policy evaluation and utilization  |                                          | Diseases of the circulatory system                           |                                                                                      | acute stroke (ICD10 codes: I60-63)                                          | Older persons               | aged 75 years or older |
| Nishimura 2019 | Development of Quality Indicators of Stroke Centers and Feasibility of Their Measurement Using a Nationwide Insurance Claims Database in Japan - J-ASPECT Study                                                         | DPC       | J-ASPECT                                                                           | Nationwide | 2013                                      | 2015 | Quality of care                           |                                           | Diseases of the circulatory system       |                                                              | stroke                                                                               | Others                                                                      | Exclusion: <18 years of age |                        |
| Yasaka 2018    | Recurrent Stroke and Bleeding Events after Acute Cardioembolic Stroke-Analysis Using Japanese Healthcare Database from Acute-Care Institutions                                                                          | MDV       |                                                                                    | Nationwide | 2008                                      | 2013 | Clinical epidemiology, course of diseases | Medical treatment status                  | Diseases of the circulatory system       |                                                              | cardioembolic stroke                                                                 |                                                                             |                             |                        |

|                                                 |                                                                                                                                                                                                  |           |                                                                         |            |                                 |      |                                           |                                           |                                    |                                                                     |                                                                               |                         |                                                 |                        |
|-------------------------------------------------|--------------------------------------------------------------------------------------------------------------------------------------------------------------------------------------------------|-----------|-------------------------------------------------------------------------|------------|---------------------------------|------|-------------------------------------------|-------------------------------------------|------------------------------------|---------------------------------------------------------------------|-------------------------------------------------------------------------------|-------------------------|-------------------------------------------------|------------------------|
| Wada 2016                                       | Outcomes of Argatroban Treatment in Patients With Atherothrombotic Stroke: Observational Nationwide Study in Japan                                                                               | DPC       |                                                                         | Nationwide | 2010                            | 2012 | Intervention effect                       |                                           | Diseases of the circulatory system |                                                                     | atherothrombotic stroke                                                       | Others                  | aged ≥40 years                                  |                        |
| Amin 2019                                       | Trends in hospital standardized mortality ratios for stroke in Japan between 2012 and 2016: a retrospective observational study                                                                  | DPC       | Medi-Target benchmarking project (All Japan Hospital Association: AJHA) | Nationwide | 2012                            | 2016 | Clinical epidemiology, course of diseases |                                           | Diseases of the circulatory system |                                                                     | stroke                                                                        |                         |                                                 |                        |
| Wada 2016                                       | Ozarel for Patients With Noncardioembolic Ischemic Stroke: A Propensity Score-Matched Analysis                                                                                                   | DPC       |                                                                         | Nationwide | 2010                            | 2012 | Intervention effect                       |                                           | Diseases of the circulatory system |                                                                     | noncardioembolic stroke                                                       | Others                  | aged ≥40 years                                  |                        |
| Matsui 2015                                     | Variation in Risk-Standardized Mortality of Stroke among Hospitals in Japan                                                                                                                      | DPC       |                                                                         | Nationwide | 2012                            | 2013 | Health policy evaluation and utilization  |                                           | Diseases of the circulatory system |                                                                     | stroke                                                                        | Others                  | aged ≥20 years                                  |                        |
| Ido 2020                                        | Effect of treatment modality and cerebral vasospasm agent on patient outcomes after aneurysmal subarachnoid hemorrhage in the elderly aged 75 years and older                                    | DPC       | J-ASPECT Study Diagnosis Procedure Combination                          | Nationwide | 2010                            | 2014 | Intervention effect                       |                                           | Diseases of the circulatory system |                                                                     | subarachnoid hemorrhage                                                       |                         |                                                 |                        |
| Matsuda 2018                                    | [Big data analysis of medical and nursing care: An analysis of the prognosis of patients with subarachnoid hemorrhage: In relation to normal pressure hydrocephalus]*                            | NHI/LSEHS | medical insurance claims and LTC insurance claims data                  | Others     | A municipality in Western Japan | 2011 | 2016                                      | Clinical epidemiology, course of diseases |                                    | Diseases of the circulatory system                                  |                                                                               | subarachnoid hemorrhage |                                                 |                        |
| Hironaka 2020                                   | Outcomes in Elderly Japanese Patients Treated for Aneurysmal Subarachnoid Hemorrhage: A Retrospective Nationwide Study                                                                           | DPC       |                                                                         | Nationwide | 2010                            | 2016 | Clinical epidemiology, course of diseases | Medical treatment status                  | Diseases of the circulatory system |                                                                     | aneurysmal subarachnoid hemorrhage (ICD10 codes, I60.0-I60.7)                 |                         | age groups                                      |                        |
| Ikawa 2020                                      | Risk Management of Aneurysmal Subarachnoid Hemorrhage by Age and Treatment Method from a Nationwide Database in Japan                                                                            | DPC       |                                                                         | Nationwide | 2010                            | 2015 | Intervention effect                       |                                           | Diseases of the circulatory system |                                                                     | aneurysmal subarachnoid hemorrhage                                            |                         | age group                                       |                        |
| Ikawa 2020                                      | In-hospital mortality and poor outcome after surgical clipping and endovascular coiling for aneurysmal subarachnoid hemorrhage using nationwide databases: a systematic review and meta-analysis | DPC       | systematic review                                                       | Nationwide | 2010                            | 2015 | Intervention effect                       |                                           | Diseases of the circulatory system |                                                                     | aneurysmal subarachnoid hemorrhage                                            |                         |                                                 |                        |
| Kurogi 2020                                     | Effects of case volume and comprehensive stroke center capabilities on patient outcomes of clipping and coiling for subarachnoid hemorrhage                                                      | DPC       | J-ASPECT                                                                | Nationwide | 2010                            | 2015 | Health policy evaluation and utilization  | Intervention effect                       | Diseases of the circulatory system |                                                                     | subarachnoid hemorrhage                                                       |                         |                                                 |                        |
| Kurogi 2018                                     | Effect of treatment modality on in-hospital outcome in patients with subarachnoid hemorrhage: a nationwide study in Japan (J-ASPECT Study)                                                       | DPC       | J-ASPECT Study                                                          | Nationwide | 2012                            | 2013 | Intervention effect                       |                                           | Diseases of the circulatory system |                                                                     | subarachnoid hemorrhage (I60.0-9)                                             |                         |                                                 |                        |
| Oda 2021                                        | Snowfall reduces the risk of chronic subdural hematoma onset: Analysis of an administrative database in Japan                                                                                    | DPC       |                                                                         | Nationwide | 2010                            | 2016 | Clinical epidemiology, course of diseases |                                           | Diseases of the circulatory system | Injury, poisoning and certain other consequences of external causes | chronic subdural hematoma (I62.0, S65.0)                                      | Others                  | aged ≥40 years                                  |                        |
| Kanaoka 2020                                    | Role of climatic factors in the incidence of Takotsubo syndrome: A nationwide study from 2012 to 2016                                                                                            | DPC       | JROAD-DPC (Japanese Circulation Society)                                | Nationwide | 2012                            | 2016 | Clinical epidemiology, course of diseases |                                           | Diseases of the circulatory system |                                                                     | Takotsubo syndrom (ICD-10 code I518)                                          | Others                  | aged ≥20 years                                  |                        |
| Isogai 2018                                     | Clinical characteristics of patients with Takotsubo syndrome diagnosed without coronary artery evaluation: A retrospective nationwide study                                                      | DPC       |                                                                         | Nationwide | 2011                            | 2014 | Medical treatment status                  |                                           | Diseases of the circulatory system |                                                                     | Takotsubo syndrome                                                            | Others                  | aged ≥20 years                                  |                        |
| Isogai 2017                                     | Seasonal variation in patient characteristics and in-hospital outcomes of Takotsubo syndrome: a nationwide retrospective cohort study in Japan                                                   | DPC       |                                                                         | Nationwide | 2011                            | 2013 | Clinical epidemiology, course of diseases |                                           | Diseases of the circulatory system |                                                                     | Takotsubo syndrome (I42.8, I42.9 or I51.8)                                    | Others                  | aged ≥20 years                                  |                        |
| Isogai 2014                                     | Out-of-hospital versus in-hospital Takotsubo cardiomyopathy: analysis of 3719 patients in the Diagnosis Procedure Combination database in Japan                                                  | DPC       |                                                                         | Nationwide | 2010                            | 2013 | Clinical epidemiology, course of diseases |                                           | Diseases of the circulatory system |                                                                     | Takotsubo cardiomyopathy                                                      |                         |                                                 |                        |
| Isogai 2019                                     | In-hospital Takotsubo syndrome versus in-hospital acute myocardial infarction among patients admitted for non-cardiac diseases: a nationwide inpatient database study                            | DPC       |                                                                         | Nationwide | 2010                            | 2014 | Clinical epidemiology, course of diseases |                                           | Diseases of the circulatory system |                                                                     | In-hospital Takotsubo syndrome versus in-hospital acute myocardial infarction | Others                  | aged ≥20 years                                  |                        |
| Isogai 2016                                     | Early beta-blocker use and in-hospital mortality in patients with Takotsubo cardiomyopathy                                                                                                       | DPC       |                                                                         | Nationwide | 2010                            | 2014 | Intervention effect                       |                                           | Diseases of the circulatory system |                                                                     | Takotsubo cardiomyopathy                                                      | Others                  | aged ≥20 years                                  |                        |
| Winburn 2019                                    | Estimating the Prevalence of Transthyretin Amyloid Cardiomyopathy in a Large In-Hospital Database in Japan                                                                                       | MDV       |                                                                         | Nationwide | 2010                            | 2018 | Clinical epidemiology, course of diseases |                                           | Diseases of the circulatory system |                                                                     | Transthyretin Amyloid Cardiomyopathy                                          | Others                  | aged ≥20 years                                  |                        |
| Ikawa 2020                                      | Propensity Score Matching Analysis for the Patients of Unruptured Cerebral Aneurysm from a Post Hoc Analysis of a Nationwide Database in Japan                                                   | DPC       |                                                                         | Nationwide | 2010                            | 2015 | Intervention effect                       |                                           | Diseases of the circulatory system |                                                                     | unruptured cerebral aneurysms                                                 |                         | age group                                       |                        |
| Ikawa 2019                                      | Treatment Risk for Elderly Patients with Unruptured Cerebral Aneurysm from a Nationwide Database in Japan                                                                                        | DPC       |                                                                         | Nationwide | 2010                            | 2015 | Intervention effect                       |                                           | Diseases of the circulatory system |                                                                     | Unruptured Cerebral Aneurysm                                                  | Others                  | 12 to 93 years of age                           |                        |
| Saikou 2015                                     | Economic Burden of Venous Thromboembolism in Patients Undergoing Major Abdominal Surgery                                                                                                         | MDV       |                                                                         | Nationwide | 2003                            | 2009 | Clinical epidemiology, course of diseases | Health economics                          | Diseases of the circulatory system |                                                                     | venous thromboembolism                                                        | Others                  | aged 18 years or older                          |                        |
| Takai 2013                                      | Economic Impact of Venous Thromboembolism Following Major Orthopaedic Surgery in Japan                                                                                                           | MDV       |                                                                         | Nationwide | 2003                            | 2009 | Intervention effect                       | Health economics                          | Diseases of the circulatory system |                                                                     | Venous thromboembolism                                                        | Others                  | age ≥18 years                                   |                        |
| Yamashita 2020                                  | Temporal Trends in the Practice Pattern for Venous Thromboembolism in Japan: Insight From JROAD-DPC                                                                                              | DPC       | JROAD-DPC                                                               | Nationwide | 2012                            | 2017 | Medical treatment status                  |                                           | Diseases of the circulatory system |                                                                     | venous thromboembolism                                                        | Others                  | aged ≥20 years                                  |                        |
| Ohyama 2019                                     | Effect of Inferior Vena Cava Filter on Venous Thromboembolism Mortality in Japan - JROAD and JROAD-DPC Registry Analysis                                                                         | DPC       | JROAD-DPC                                                               | Nationwide | 2012                            | 2015 | Intervention effect                       |                                           | Diseases of the circulatory system | Pregnancy, childbirth and the puerperium                            | venous thromboembolism                                                        | Others                  | aged ≥20 years                                  |                        |
| Nakamura 2017                                   | Predictors of venous thromboembolism recurrence and the bleeding events identified using a Japanese healthcare database                                                                          | MDV       |                                                                         | Nationwide | 2008                            | 2013 | Medical treatment status                  | Clinical epidemiology, course of diseases | Diseases of the circulatory system | Pregnancy, childbirth and the puerperium                            | venous thromboembolism                                                        |                         |                                                 |                        |
| 10 Diseases of the respiratory system (J00-J99) |                                                                                                                                                                                                  |           |                                                                         |            |                                 |      |                                           |                                           |                                    |                                                                     |                                                                               |                         |                                                 |                        |
| Maeda 2021                                      | Nutritional management in inpatients with aspiration pneumonia: a cohort medical claims database study                                                                                           | MDV       |                                                                         | Nationwide | 2013                            | 2018 | Medical treatment status                  |                                           | Diseases of the respiratory system |                                                                     | aspiration pneumonia (ICD-10, J69)                                            | Older persons           | aged ≥65 years                                  |                        |
| Matsuda 2018                                    | [Big data analysis of medical and nursing care: An analysis of presymptomatic situations in patients with aspiration pneumonia]*                                                                 | NHI/LSEHS | medical insurance claims and LTC insurance claims data                  | Others     | A municipality in Western Japan | 2013 | 2014                                      | Clinical epidemiology, course of diseases |                                    | Diseases of the respiratory system                                  |                                                                               | aspiration pneumonitis  | Older persons                                   | aged 65 years or older |
| Momosaki 2016                                   | Predictive factors for oral intake after aspiration pneumonia in older adults                                                                                                                    | DPC       |                                                                         | Nationwide | 2011                            | 2012 | Clinical epidemiology, course of diseases |                                           | Diseases of the respiratory system |                                                                     | aspiration pneumonia (ICD-10 code, J69)                                       | Older persons           | aged ≥65 years                                  |                        |
| Yagi 2016                                       | Effect of early rehabilitation on activities of daily living in patients with aspiration pneumonia                                                                                               | DPC       |                                                                         | Nationwide | 2010                            | 2013 | Intervention effect                       |                                           | Diseases of the respiratory system |                                                                     | aspiration pneumonia (ICD-10 code, J69)                                       | Older persons           | excluded aged under 60 years (elderly patients) |                        |
| Momosaki 2015                                   | Effect of early rehabilitation by physical therapists on in-hospital mortality after aspiration pneumonia in the elderly                                                                         | DPC       |                                                                         | Nationwide | 2010                            | 2012 | Intervention effect                       |                                           | Diseases of the respiratory system |                                                                     | aspiration pneumonia (ICD-10 codes, J69)                                      | Older persons           | aged 70 to 100 years                            |                        |
| Momosaki 2015                                   | Effect of dysphagia rehabilitation on oral intake in elderly patients with aspiration pneumonia                                                                                                  | DPC       |                                                                         | Nationwide | 2010                            | 2012 | Intervention effect                       |                                           | Diseases of the respiratory system |                                                                     | aspiration pneumonia (ICD-10 codes, J69)                                      | Older persons           | excluded aged less than 65 years                |                        |

|                |                                                                                                                                                                                                      |           |                                                             |              |                                        |      |      |                                           |                                           |                                    |                                               |                                                          |               |                                                     |
|----------------|------------------------------------------------------------------------------------------------------------------------------------------------------------------------------------------------------|-----------|-------------------------------------------------------------|--------------|----------------------------------------|------|------|-------------------------------------------|-------------------------------------------|------------------------------------|-----------------------------------------------|----------------------------------------------------------|---------------|-----------------------------------------------------|
| Sasaki 2019    | Quality Scope 医療の質への展望 「医療の質の評価・公表等推進事業」におけるDPCデータ活用による考察 誤嚥性肺炎の2指標について                                                                                                                              | DPC       | (EF file)                                                   | Nationwide   | 68 hospitals                           | 2016 | 2017 | Quality of care                           |                                           | Diseases of the respiratory system |                                               | aspiration pneumonia                                     |               |                                                     |
| Tsuneishi 2017 | [Association between Number of Teeth and Medical Visit due to Aspiration Pneumonia in Older People Using the Receipt and Health Checkup Information Database]                                        | NOB       |                                                             | Nationwide   |                                        | 2013 | 2013 | Clinical epidemiology, course of diseases |                                           | Diseases of the respiratory system | Diseases of the digestive system              | Number of Teeth, Aspiration Pneumonia                    | Older persons | aged 65 or older                                    |
| Abe 2021       | Trends in hospitalizations for asthma during the COVID-19 outbreak in Japan                                                                                                                          | MDV       |                                                             | Nationwide   |                                        | 2017 | 2020 | COVID-19                                  | Medical treatment status                  | Diseases of the respiratory system |                                               | asthma                                                   |               | children (aged <18 years) , adults (aged >18 years) |
| Nagase 2020    | Prevalence, disease burden, and treatment reality of patients with severe, uncontrolled asthma in Japan                                                                                              | JMDC      |                                                             | Nationwide   |                                        | 2014 | 2015 | Clinical epidemiology, course of diseases | Medical treatment status                  | Diseases of the respiratory system |                                               | asthma                                                   | Others        | aged ≥17 years at the index data                    |
| Tomita 2020    | Acid-suppressive medication as a possible risk factor for late-onset asthma                                                                                                                          | Others    | data from 3 health insurance societies (MHI Co., Ltd)       | Others       | 3 health insurance societies           | 2011 | 2015 | Intervention effect                       |                                           | Diseases of the respiratory system | Others                                        | asthma, Acid-suppressive medications                     | Others        | 40-64-year-old                                      |
| Yoshida 2020   | Assessment of asthma severity according to treatment steps in Japanese pediatric patients: a descriptive cross-sectional study using an administrative claims database                               | JMDC      |                                                             | Nationwide   |                                        | 2009 | 2015 | Medical treatment status                  |                                           | Diseases of the respiratory system |                                               | asthma                                                   | Children      | aged 2-15 years old                                 |
| Sanada 2020    | [Relationship between weather and childhood asthma: the "Health Weather" project using weather and medical data]                                                                                     | JMDC      |                                                             | Nationwide   |                                        | 2015 | 2016 | Clinical epidemiology, course of diseases |                                           | Diseases of the respiratory system |                                               | asthma                                                   | Children      | aged <10 years                                      |
| Sato 2019      | The Prevalence, Characteristics, and Patient Burden of Severe Asthma Determined by Using a Japan Health Care Claims Database                                                                         | JMDC      |                                                             | Nationwide   |                                        | 2014 | 2016 | Clinical epidemiology, course of diseases | Patient health service utilization        | Diseases of the respiratory system |                                               | asthma                                                   | Others        | >15-65 years of age                                 |
| Atsuta 2018    | Patients with Asthma Prescribed Once-Daily Fluticasone Furoate/Vilanterol or Twice-Daily Fluticasone Propionate/Salmeterol as Maintenance Treatment: Analysis from a Claims Database                 | JMDC      |                                                             | Nationwide   |                                        | 2014 | 2015 | Medical treatment status                  | Patient health service utilization        | Diseases of the respiratory system |                                               | Asthma                                                   | Others        | aged ≥15 years                                      |
| Yoshida 2018   | Prenatal and early-life antibiotic use and risk of childhood asthma: A retrospective cohort study                                                                                                    | JMDC      |                                                             | Nationwide   |                                        | 2005 | 2014 | Intervention effect                       |                                           | Diseases of the respiratory system | Others                                        | asthma, antibiotic use                                   | Children      | until age 6                                         |
| Hamada 2015    | Asthma Controller Medications for Children in Japan: Analysis of an Administrative Claims Database                                                                                                   | JMDC      |                                                             | Nationwide   |                                        | 2008 | 2012 | Medical treatment status                  |                                           | Diseases of the respiratory system |                                               | asthma                                                   | Children      | aged 3 to 15 years                                  |
| Nishimuta 2014 | [The Factual Survey of Pediatric Asthma Treatment Using Electronic Receipt Data : Aiming for the Improvement of QOL of Both Patients and Their Parents]                                              | JMDC      |                                                             | Nationwide   |                                        | 2005 | 2010 | Clinical epidemiology, course of diseases | Medical treatment status                  | Diseases of the respiratory system |                                               | asthma                                                   | Children      | pediatric asthma patients                           |
| Ishii 2020     | Inhaled corticosteroid-containing regimens reduce hospitalizations and healthcare costs among elderly asthmatics: Real-world validation using the national health insurance claims database          | NHI/LSEHS | NHI                                                         | Prefecture   | Oita                                   | 2011 | 2018 | Intervention effect                       | Health economics                          | Diseases of the respiratory system |                                               | asthma                                                   | Older persons | 65 years of age or older                            |
| Morishima 2013 | Physician adherence to asthma treatment guidelines in Japan: focus on inhaled corticosteroids                                                                                                        | NHI/LSEHS | National Health Insurance and Long Life Medical Care System | Prefecture   | Kyoto                                  | 2009 | 2009 | Medical treatment status                  | Quality of care                           | Diseases of the respiratory system |                                               | Asthma                                                   | Others        | age ≥15 years                                       |
| Sato 2020      | Burden of Asthma in Elderly Japanese Patients: Using Hospital-Based Administrative Claims Data                                                                                                       | MDV       |                                                             | Nationwide   |                                        | 2014 | 2017 | Clinical epidemiology, course of diseases | Health economics                          | Diseases of the respiratory system |                                               | asthma or status asthmaticus (ICD-10: codes J45 and J46) | Others        | ≥15 years of age                                    |
| Takeuchi 2017  | Risk of Acute Asthma Attacks Associated With Nonsteroidal Anti-inflammatory Drugs: A Self-Controlled Case Series                                                                                     | JMDC      |                                                             | Nationwide   |                                        | 2012 | 2013 | Intervention effect                       |                                           | Diseases of the respiratory system |                                               | asthma                                                   |               |                                                     |
| Hasegawa 2017  | Prognostic nomogram for inpatients with asthma exacerbation                                                                                                                                          | DPC       |                                                             | Nationwide   |                                        | 2010 | 2013 | Prediction model                          | Clinical epidemiology, course of diseases | Diseases of the respiratory system |                                               | asthma                                                   | Others        | aged ≥18 years                                      |
| Hirashima 2016 | Effect of intravenous magnesium sulfate on mortality in patients with severe acute asthma                                                                                                            | DPC       |                                                             | Nationwide   |                                        | 2010 | 2013 | Intervention effect                       |                                           | Diseases of the respiratory system |                                               | severe acute asthma (ICD-10 code: J46)                   | Others        | aged ≥15 years                                      |
| Inoue 2019     | A retrospective cohort study evaluating healthcare resource utilization in patients with asthma in Japan                                                                                             | JMDC      |                                                             | Nationwide   |                                        | 2009 | 2015 | Medical treatment status                  | Health economics                          | Diseases of the respiratory system |                                               | asthma                                                   | Others        | aged ≥16 years                                      |
| Inoue 2021     | Uncontrolled asthma: a retrospective cohort study in Japanese patients newly prescribed with medium-/high-dose ICS/LABA                                                                              | JMDC      |                                                             | Nationwide   |                                        | 2009 | 2015 | Medical treatment status                  | Intervention effect                       | Diseases of the respiratory system |                                               | uncontrolled asthma                                      | Others        | aged ≥12 years                                      |
| Suzuki 2020    | Clinical characteristics, treatment patterns, disease burden, and persistence/adherence in patients with asthma initiating inhaled triple therapy: real-world evidence from Japan                    | JMDC      |                                                             | Nationwide   |                                        | 2015 | 2017 | Medical treatment status                  | Patient health service utilization        | Diseases of the respiratory system |                                               | asthma                                                   | Others        | ≥15 years of age                                    |
| To 2021        | Real-world treatment and health care resource use among severe asthma patients in Japan                                                                                                              | MDV       |                                                             | Nationwide   |                                        | 2014 | 2018 | Clinical epidemiology, course of diseases | Health economics                          | Diseases of the respiratory system |                                               | asthma                                                   |               |                                                     |
| Tomita 2019    | Obesity, but not metabolic syndrome, as a risk factor for late-onset asthma in Japanese women                                                                                                        | Others    | MHI Co., Ltd.                                               | Others       | three large health insurance societies | 2011 | 2015 | Clinical epidemiology, course of diseases |                                           | Diseases of the respiratory system | Endocrine, nutritional and metabolic diseases | asthma, Metabolic syndrome, Obesity                      | Others        | aged 40-64 years                                    |
| Okubo 2017     | Impact of pediatric obesity on acute asthma exacerbation in Japan                                                                                                                                    | DPC       |                                                             | Nationwide   |                                        | 2010 | 2015 | Clinical epidemiology, course of diseases | Health economics                          | Diseases of the respiratory system | Endocrine, nutritional and metabolic diseases | acute asthma exacerbation, obesity                       | Children      | aged 3- 8 years                                     |
| Jo 2020        | Inhaled corticosteroid withdrawal may improve outcomes in elderly patients with COPD exacerbation: a nationwide database study                                                                       | DPC       |                                                             | Nationwide   |                                        | 2010 | 2016 | Intervention effect                       |                                           | Diseases of the respiratory system |                                               | chronic obstructive pulmonary disease                    | Older persons | aged ≥65 years                                      |
| Kitamura 2021  | [The pulmonary rehabilitation utilization rate among older people with chronic obstructive pulmonary disease in Japan: A retrospective study using medical and long-term care insurance claims data] | NHI/LSEHS | medical and long-term care claims data                      | Municipality | Kashiwa city in Chiba                  | 2012 | 2013 | Medical treatment status                  |                                           | Diseases of the respiratory system |                                               | COPD (ICD10: J41-J44)                                    | Older persons | aged ≥63 years                                      |
| Goto 2019      | Machine Learning-Based Prediction Models for 30-Day Readmission after Hospitalization for Chronic Obstructive Pulmonary Disease                                                                      | DPC       |                                                             | Nationwide   |                                        | 2011 | 2016 | Prediction model                          | Clinical epidemiology, course of diseases | Diseases of the respiratory system |                                               | COPD                                                     | Others        | aged ≥40 years                                      |
| Hasegawa 2014  | Factors affecting mortality following emergency admission for chronic obstructive pulmonary disease                                                                                                  | DPC       |                                                             | Nationwide   |                                        | 2010 | 2013 | Clinical epidemiology, course of diseases |                                           | Diseases of the respiratory system |                                               | COPD (ICD-10 codes: J41, J42, J43, J44)                  | Others        | aged ≥40 years                                      |
| Jo 2019        | Reduction in exacerbation of COPD in patients of advanced age using the Japanese Kampo medicine Dai-kenchu-to: a retrospective cohort study                                                          | DPC       |                                                             | Nationwide   |                                        | 2010 | 2016 | Intervention effect                       |                                           | Diseases of the respiratory system | Diseases of the digestive system              | COPD, gastrointestinal adverse effects                   | Older persons | aged ≥75 years                                      |
| Matsui 2017    | Outcomes after early and delayed rehabilitation for exacerbation of chronic obstructive pulmonary disease: a nationwide retrospective cohort study in Japan                                          | DPC       |                                                             | Nationwide   |                                        | 2010 | 2013 | Intervention effect                       |                                           | Diseases of the respiratory system |                                               | COPD                                                     |               |                                                     |
| Nakahara 2016  | Mortality-Reducing Effect of Rehabilitation for COPD: Observational Propensity-Matched Cohort Study Using a Nationwide Database                                                                      | DPC       |                                                             | Nationwide   |                                        | 2010 | 2011 | Intervention effect                       |                                           | Diseases of the respiratory system |                                               | COPD                                                     | Others        | aged ≥40 years                                      |
| Murata 2010    | [Recent topics in COPD treatment] Current status of COPD patients as seen from medical fee statement (health insurance claims) data*                                                                 | JMDC      |                                                             | Nationwide   |                                        | 2005 | 2008 | Medical treatment status                  |                                           | Diseases of the respiratory system |                                               | COPD                                                     | Others        | aged ≥40 years                                      |

|                 |                                                                                                                                                                                                                          |           |                                                                                 |            |          |      |                                           |                          |                                           |                                                                     |                                                                       |                                             |
|-----------------|--------------------------------------------------------------------------------------------------------------------------------------------------------------------------------------------------------------------------|-----------|---------------------------------------------------------------------------------|------------|----------|------|-------------------------------------------|--------------------------|-------------------------------------------|---------------------------------------------------------------------|-----------------------------------------------------------------------|---------------------------------------------|
| Yamauchi 2014   | Paradoxical association between body mass index and in-hospital mortality in elderly patients with chronic obstructive pulmonary disease in Japan                                                                        | DPC       |                                                                                 | Nationwide | 2010     | 2013 | Clinical epidemiology, course of diseases |                          | Diseases of the respiratory system        | chronic obstructive pulmonary disease                               | Older persons                                                         | over 65 years                               |
| Yamauchi 2016   | Mortality associated with bone fractures in COPD patients                                                                                                                                                                | DPC       |                                                                                 | Nationwide | 2010     | 2013 | Clinical epidemiology, course of diseases |                          | Diseases of the respiratory system        | Injury, poisoning and certain other consequences of external causes | COPD, bone fracture                                                   | Others<br>aged 40 years and older           |
| Hidaka 2021     | Identification of risk factors for mortality and delayed oral dietary intake in patients with open drainage due to deep neck infections: A nationwide study using a Japanese inpatient database                          | DPC       |                                                                                 | Nationwide | 2012     | 2017 | Clinical epidemiology, course of diseases |                          | Diseases of the respiratory system        |                                                                     | deep neck infection                                                   |                                             |
| Suzuki 2015     | Factors associated with severe epiglottitis in adults: Analysis of a Japanese inpatient database                                                                                                                         | DPC       |                                                                                 | Nationwide | 2011     | 2012 | Clinical epidemiology, course of diseases |                          | Diseases of the respiratory system        |                                                                     | Epiglottitis (ICD-10 code: J05.1)                                     | Others<br>aged 20 or older                  |
| Takeuchi 2013   | The burden of epiglottitis among Japanese children before the Haemophilus influenzae type b vaccination era: an analysis using a nationwide administrative database                                                      | DPC       |                                                                                 | Nationwide | 2007     | 2008 | Clinical epidemiology, course of diseases |                          | Diseases of the respiratory system        |                                                                     | epiglottitis (J05.1)                                                  | Children<br>children ≤5 years old           |
| Aso 2019        | Systemic glucocorticoids plus cyclophosphamide for acute exacerbation of idiopathic pulmonary fibrosis: a retrospective nationwide study                                                                                 | DPC       |                                                                                 | Nationwide | 2010     | 2014 | Intervention effect                       |                          | Diseases of the respiratory system        |                                                                     | idiopathic pulmonary fibrosis                                         | Others<br>patients aged ≥15 years           |
| Oda 2018        | Respiratory comorbidities and risk of mortality in hospitalized patients with idiopathic pulmonary fibrosis                                                                                                              | DPC       |                                                                                 | Nationwide | 2010     | 2013 | Clinical epidemiology, course of diseases |                          | Diseases of the respiratory system        |                                                                     | idiopathic pulmonary fibrosis                                         |                                             |
| Urushiyama 2021 | Preoperative use of piperidone and reduced risk of postoperative severe respiratory complications in patients with idiopathic pulmonary fibrosis: Propensity score-matched analysis using a nationwide database in Japan | DPC       |                                                                                 | Nationwide | 2010     | 2018 | Intervention effect                       |                          | Diseases of the respiratory system        |                                                                     | idiopathic pulmonary fibrosis                                         |                                             |
| Aso 2018        | Effect of cyclosporine A on mortality after acute exacerbation of idiopathic pulmonary fibrosis                                                                                                                          | DPC       |                                                                                 | Nationwide | 2010     | 2014 | Intervention effect                       |                          | Diseases of the respiratory system        |                                                                     | idiopathic pulmonary fibrosis (ICD-10 codes: J84.1, J84.8, and J84.9) | Others<br>aged ≥15 years                    |
| Dronova 2021    | Cost-effectiveness of Baloxavir Marboxil compared with Laninamivir for the treatment of influenza in patients at high risk for complications in Japan                                                                    | Others    | JammNet claims database (+clinical trial data and literature)                   | Nationwide | 2016     | 2017 | Health economics                          |                          | Diseases of the respiratory system        |                                                                     | influenza                                                             |                                             |
| Shibata 2019    | Influenza vaccination effectiveness for people aged under 65 years in Japan, 2013/2014 season: application of a doubly robust method to a large-scale, real-world dataset                                                | JMDC      |                                                                                 | Nationwide | 2013     | 2014 | Intervention effect                       |                          | Diseases of the respiratory system        |                                                                     | influenza (ICD-10 codes J101, J110, J111, and J118)                   | Others<br>aged under 65 years               |
| Miyashita 2021  | Risk Factors for Pneumonia and Death in Adult Patients With Seasonal Influenza and Establishment of Prediction Scores: A Population-Based Study                                                                          | NHI/LSEHS | SKDB                                                                            | Prefecture | Shizuoka | 2015 | 2018                                      | Prediction model         | Clinical epidemiology, course of diseases |                                                                     | influenza, pneumonia                                                  | Others<br>≥18 year of age                   |
| Skrzeczek 2021  | Cost-effectiveness of baloxavir marboxil compared to laninamivir for the treatment of influenza in Japan                                                                                                                 | Others    | JammNet claims database (sourced from the Phase III clinical trial)             | Nationwide | 2016     | 2017 | Health economics                          |                          | Diseases of the respiratory system        |                                                                     | influenza                                                             | Others<br>12-64 year of age                 |
| Komeda 2020     | Comparison of Hospitalization Incidence in Influenza Outpatients Treated With Baloxavir Marboxil or Neuraminidase Inhibitors: A Health Insurance Claims Database Study                                                   | JMDC      |                                                                                 | Nationwide | 2018     | 2019 | Intervention effect                       |                          | Diseases of the respiratory system        |                                                                     | Influenza                                                             | Others<br>aged <1 year were excluded        |
| Komeda 2020     | Comparison of Household Transmission of Influenza Virus From Index Patients Treated With Baloxavir Marboxil or Neuraminidase Inhibitors: A Health Insurance Claims Database Study                                        | JMDC      |                                                                                 | Nationwide | 2018     | 2019 | Intervention effect                       |                          | Diseases of the respiratory system        |                                                                     | Influenza                                                             |                                             |
| Sugawara 2019   | Association of severe abnormal behavior and acetaminophen with/without neuraminidase inhibitors                                                                                                                          | NDB       |                                                                                 | Nationwide | 2009     | 2017 | Intervention effect                       |                          | Diseases of the respiratory system        |                                                                     | influenza                                                             | Children<br>5-19 year of age                |
| Yokomichi 2019  | Incidence of hospitalisation for severe complications of influenza virus infection in Japanese patients between 2012 and 2016: a cross-sectional study using routinely collected administrative data                     | JMDC      |                                                                                 | Nationwide | 2012     | 2016 | Clinical epidemiology, course of diseases |                          | Diseases of the respiratory system        | Diseases of the nervous system                                      | influenza, influenza encephalitis/encephalopathy                      | Others<br>0-74 year of age                  |
| Nakamura 2018   | Severe abnormal behavior incidence after administration of neuraminidase inhibitors using the national database of medical claims                                                                                        | NDB       | NDBEMC                                                                          | Nationwide | 2010     | 2014 | Intervention effect                       |                          | Diseases of the respiratory system        |                                                                     | influenza                                                             | Children<br>5-19years                       |
| Ohkusa 2018     | Comparative study of preciseness in the regional variation of influenza in Japan among the National Official Sentinel Surveillance of Infectious Diseases and the National Database of Electronic Medical Claims         | NDB       | Aggregated data: National Official Sentinel Surveillance of Infectious Diseases | Nationwide | 2010     | 2014 | Research methodology                      | Socioeconomic comparison | Diseases of the respiratory system        |                                                                     | influenza                                                             |                                             |
| Okubo 2018      | Dose-response relationship between weight status and clinical outcomes in pediatric influenza-related respiratory infections                                                                                             | DPC       |                                                                                 | Nationwide | 2010     | 2015 | Clinical epidemiology, course of diseases |                          | Diseases of the respiratory system        |                                                                     | bronchitis/pneumonia and influenza                                    | Children<br>aged under 18 years             |
| Shibata 2018    | Effectiveness of influenza vaccination for children in Japan: Four-year observational study using a large-scale claims database                                                                                          | JMDC      | used application for an influenza vaccination subsidy                           | Nationwide | 2010     | 2014 | Intervention effect                       |                          | Diseases of the respiratory system        |                                                                     | influenza (J101, J110, J111 and J118)                                 | Children<br>children aged 1-15 years        |
| Sruamsiri 2017  | Impact of patient characteristics and treatment procedures on hospitalization cost and length of stay in Japanese patients with influenza: A structural equation modelling approach                                      | MDV       |                                                                                 | Nationwide | 2014     | 2015 | Health economics                          |                          | Diseases of the respiratory system        |                                                                     | influenza (J10.1, J11.1 and J11.8)                                    |                                             |
| Nakamura 2015   | Evaluation of estimated number of influenza patients from national sentinel surveillance using the national database of electronic medical claims                                                                        | NDB       | Aggregated data: NOSSID, Prescription Surveillance                              | Nationwide | 2012     | 2013 | Clinical epidemiology, course of diseases | Research methodology     | Diseases of the respiratory system        |                                                                     | influenza                                                             |                                             |
| Nakamura 2015   | [Evaluation of the estimated number of influenza patients by prefecture in pharmacy surveillance using nationwide electronic medical health insurance claims]*                                                           | NDB       | Aggregated data: Pharmacy Surveillance                                          | Nationwide | 2010     | 2013 | Research methodology                      |                          | Diseases of the respiratory system        |                                                                     | influenza                                                             |                                             |
| Nakano 2014     | Spread of viral infection to family members from influenza patients treated with a neuraminidase inhibitor                                                                                                               | JMDC      |                                                                                 | Nationwide | 2010     | 2011 | Intervention effect                       |                          | Diseases of the respiratory system        |                                                                     | influenza                                                             |                                             |
| Sugawara 2012   | Real-time prescription surveillance and its application to monitoring seasonal influenza activity in Japan                                                                                                               | Others    | electronic records related to prescription drugs                                | Nationwide | 2009     | 2011 | Clinical epidemiology, course of diseases |                          | Diseases of the respiratory system        |                                                                     | influenza                                                             |                                             |
| Takeuchi 2012   | Clinical features of infants hospitalized for 2009 pandemic influenza A (H1N1) in Japan: analysis using a national hospital discharge database                                                                           | DPC       |                                                                                 | Nationwide | 2009     | 2009 | Clinical epidemiology, course of diseases |                          | Diseases of the respiratory system        |                                                                     | Influenza(H1N1)                                                       | Children<br>children 12 to 24 months of age |
| Shirado 2020    | Impact of Body Mass Index on Activities of Daily Living in Patients with Idiopathic Interstitial Pneumonias                                                                                                              | JMDC      | JMDC DPC database                                                               | Nationwide | 2014     | 2018 | Clinical epidemiology, course of diseases |                          | Diseases of the respiratory system        |                                                                     | idiopathic interstitial pneumonia (ICD-10: code J84)                  | Others<br>over 20 years old                 |
| Sawabe 2020     | Effectiveness of Early Versus Delayed Physical Rehabilitation on In-Hospital Mortality in Interstitial Pneumonia: A Retrospective Cohort Study                                                                           | JMDC      |                                                                                 | Nationwide | 2014     | 2018 | Intervention effect                       |                          | Diseases of the respiratory system        |                                                                     | interstitial pneumonia (ICD-10 code J84)                              |                                             |
| Momo 2018       | Assessment of statin-induced interstitial pneumonia in patients treated for hyperlipidemia using a health insurance claims database in Japan                                                                             | JMDC      |                                                                                 | Nationwide | 2004     | 2016 | Intervention effect                       |                          | Diseases of the respiratory system        | Endocrine, nutritional and metabolic diseases                       | interstitial pneumonia, hyperlipidemia                                |                                             |
| Mouri 2019      | Continuous Neuromuscular Blockade and Mortality in Subjects With Exacerbation of Idiopathic Interstitial Pneumonias                                                                                                      | DPC       |                                                                                 | Nationwide | 2010     | 2016 | Intervention effect                       |                          | Diseases of the respiratory system        |                                                                     | idiopathic interstitial pneumonias                                    | Others<br>aged ≥18 years                    |

|                |                                                                                                                                                                                                                                   |           |     |                                                                             |            |                                  |      |                                           |                                           |                                           |                                           |                                                                                   |               |                         |                     |
|----------------|-----------------------------------------------------------------------------------------------------------------------------------------------------------------------------------------------------------------------------------|-----------|-----|-----------------------------------------------------------------------------|------------|----------------------------------|------|-------------------------------------------|-------------------------------------------|-------------------------------------------|-------------------------------------------|-----------------------------------------------------------------------------------|---------------|-------------------------|---------------------|
| Mizuno 2021    | Indications and postoperative outcomes of surgery for laryngotracheal stenosis: A descriptive study                                                                                                                               | MDV       |     | Nationwide                                                                  |            | 2008                             | 2016 | Medical treatment status                  | Intervention effect                       | Diseases of the respiratory system        |                                           | patients who underwent surgical treatments for laryngotracheal stenosis or defect |               |                         |                     |
| Tashiro 2017   | Comparison of Efficacy of Antimicrobial Agents Among Hospitalized Patients With Mycoplasma pneumoniae Pneumonia in Japan During Large Epidemics of Macrolide-Resistant M. pneumoniae Infections: A Nationwide Observational Study | DPC       |     | Nationwide                                                                  |            | 2010                             | 2013 | Intervention effect                       |                                           | Diseases of the respiratory system        |                                           | Mycoplasma pneumoniae infection                                                   | Others        | aged ≥18 years          |                     |
| Tashiro 2017   | Adjunctive corticosteroid therapy for inpatients with Mycoplasma pneumoniae pneumonia                                                                                                                                             | DPC       |     | Nationwide                                                                  |            | 2010                             | 2013 | Intervention effect                       |                                           | Diseases of the respiratory system        |                                           | Mycoplasma pneumoniae pneumonia                                                   |               |                         |                     |
| Shimizu 2020   | Predictive Validity of Body Mass Index Cutoff Values Used in the Global Leadership Initiative on Malnutrition Criteria for Discriminating Severe and Moderate Malnutrition Based on In-Patients With Pneumonia in Asians          | JMDC      |     | Nationwide                                                                  |            | 2014                             | 2018 | Prediction model                          | Clinical epidemiology, course of diseases | Diseases of the respiratory system        |                                           | pneumonia                                                                         | Older persons | aged ≥65 years          |                     |
| Tashiro 2019   | [Regional medical care: Current status and future forecast of medical expenses associated with pneumonia hospitalization in Niigata Prefecture: Towards the optimization of medical expenses]*                                    | NHI/LSEHS |     | Prefecture                                                                  | Niigata    | 2012                             | 2016 | Health economics                          | Health policy evaluation and utilization  | Diseases of the respiratory system        |                                           | pneumonia                                                                         | Older persons | aged ≥75 years          |                     |
| Uematsu 2015   | The Impact of Patient Profiles and Procedures on Hospitalization Costs through Length of Stay in Community-Acquired Pneumonia Patients Based on a Japanese Administrative Database                                                | DPC       | QIP | Nationwide                                                                  |            | 2012                             | 2013 | Health economics                          |                                           | Diseases of the respiratory system        |                                           | Pneumonia                                                                         | Others        | age ≥15 years           |                     |
| Kawamoto 2011  | [A comparison of the medial treatment of pneumonia in adults requiring hospitalization among 28 hospitals in the National Hospital Organization]                                                                                  | DPC       |     | NHO 28 hospitals                                                            | Nationwide | 2008                             | 2008 | Quality of care                           |                                           | Diseases of the respiratory system        |                                           | Pneumonia                                                                         | Others        | Adults                  |                     |
| Honda 2020     | Nasogastric Tube Feeding Versus Total Parenteral Nutrition in Older Dysphagic Patients with Pneumonia: Retrospective Cohort Study                                                                                                 | JMDC      |     | Nationwide                                                                  |            | 2014                             | 2017 | Intervention effect                       |                                           | Diseases of the respiratory system        |                                           | pneumonia (ICD codes: J10-18, J69)                                                | Older persons | aged ≥65 years          |                     |
| Ichihara 2019  | [Hospitalization for pneumococcal pneumonia among older adults in Fukuoka Prefecture using health insurance claims data]                                                                                                          | NHI/LSEHS |     | Fukuoka Prefecture Wide-Area Association of Latter-Stage Elderly Healthcare | Prefecture | Fukuoka                          | 2010 | 2017                                      | Medical treatment status                  | Health economics                          | Diseases of the respiratory system        | pneumococcal pneumonia                                                            | Older persons | aged 75 years or older  |                     |
| Matsuda 2019   | [Big data analysis of medical and nursing care: An analysis of the length of stay in the hospital by route of admission and discharge for elderly people requiring nursing care who developed pneumonia]*                         | NHI/LSEHS |     | medical insurance claims and LTC insurance claims data                      | Others     | A municipality in Western Japan  | 2011 | 2016                                      | Socioeconomic comparison                  |                                           | Diseases of the respiratory system        | pneumonia                                                                         | Older persons | aged 75 years or older  |                     |
| Matsuda 2019   | [Big data analysis of medical and nursing care: An analysis of the usage of medical and nursing care services of elderly pneumonia patients using consolidated data on health insurance claims in medical and nursing care]*      | NHI/LSEHS |     | medical insurance claims and LTC insurance claims data                      | Others     | A municipality in Western Japan  | 2012 | 2017                                      | Clinical epidemiology, course of diseases | Health policy evaluation and utilization  | Diseases of the respiratory system        | pneumonia                                                                         | Older persons | aged 65 years or older  |                     |
| Abe 2018       | Donepezil is associated with decreased in-hospital mortality as a result of pneumonia among older patients with dementia: A retrospective cohort study                                                                            | DPC       |     | Nationwide                                                                  |            | 2010                             | 2012 | Clinical epidemiology, course of diseases | Intervention effect                       | Diseases of the respiratory system        |                                           | pneumonia                                                                         | Older persons | aged≥65 years           |                     |
| Kumamaru 2014  | Association between hospital case volume and mortality in non-elderly pneumonia patients stratified by severity: a retrospective cohort study                                                                                     | DPC       |     | Nationwide                                                                  |            | 2010                             | 2010 | Health policy evaluation and utilization  |                                           | Diseases of the respiratory system        | Certain infectious and parasitic diseases | pneumonia                                                                         | Others        | aged 18-64 years        |                     |
| Kobayashi 2021 | Interrupted time-series analyses of routine vaccination program for elderly pneumonia patients in Japan: an ecological study using aggregated nationwide inpatient data                                                           | DPC       |     | MSD Japan; the number of shipped PPSV23 syringes                            | Nationwide | exclude tohoku three prefectures | 2011 | 2017                                      | Clinical epidemiology, course of diseases | Health policy evaluation and utilization  | Diseases of the respiratory system        | pneumonia                                                                         | Older persons | ≥65 years of age        |                     |
| Nagano 2021    | Hospitalization of mild cases of community-acquired pneumonia decreased more than severe ones during the COVID-19 epidemic                                                                                                        | DPC       | QIP | Nationwide                                                                  |            | 2018                             | 2020 | COVID-19                                  | Clinical epidemiology, course of diseases | Diseases of the respiratory system        | Certain infectious and parasitic diseases | pneumonia (during the COVID-19 pandemic)                                          | Others        | ≥18 year of age         |                     |
| Yahaba 2021    | Antibiotics for hospitalized children with community-acquired pneumonia in Japan: Analysis based on Japanese national database                                                                                                    | NDB       |     | Sampling data                                                               | Nationwide | 2011                             | 2014 | Medical treatment status                  |                                           | Diseases of the respiratory system        |                                           | Community-acquired pneumonia                                                      | Children      | <15 year of age         |                     |
| Yamazaki 2021  | Antibiotics prescriptions for pneumonia analyzed by claim information in Japan                                                                                                                                                    | NDB       |     | Sampling data                                                               | Nationwide | 2011                             | 2014 | Medical treatment status                  | Quality of care                           | Diseases of the respiratory system        |                                           | community-acquired pneumonia                                                      | Others        | aged ≥15 years          |                     |
| Igari 2020     | Epidemiology and treatment outcome of pneumonia: Analysis based on Japan national database                                                                                                                                        | NDB       |     | Sampling data                                                               | Nationwide | 2011                             | 2014 | Clinical epidemiology, course of diseases |                                           | Diseases of the respiratory system        |                                           | pneumonia                                                                         | Others        | aged 15 years and older |                     |
| Kimura 2020    | Switching from intravenous to oral antibiotics in hospitalized patients with community-acquired pneumonia: A real-world analysis 2010-2018                                                                                        | MDV       |     | Nationwide                                                                  |            | 2008                             | 2018 | Medical treatment status                  | Quality of care                           | Diseases of the respiratory system        |                                           | community-acquired pneumonia                                                      | Others        | ≥20 years of age        |                     |
| Imamura 2020   | [Survey of Blood Culture in Community-Acquired Pneumonia Patients Utilizing Health Insurance Claims Database]                                                                                                                     | Others    |     | CISA database (13 university hospitals)                                     | Nationwide | 2014                             | 2015 | Medical treatment status                  | Quality of care                           | Diseases of the respiratory system        |                                           | Community-Acquired Pneumonia                                                      | Others        | ≥15 years of age        |                     |
| Okubo 2018     | Recent trends in practice patterns and impact of corticosteroid use on pediatric Mycoplasma pneumoniae-related respiratory infections                                                                                             | DPC       |     | Nationwide                                                                  |            | 2010                             | 2014 | Intervention effect                       | Medical treatment status                  | Diseases of the respiratory system        | Certain infectious and parasitic diseases | M. pneumoniae bronchitis and pneumonia (A49.3, J15.7, and J20.0)                  | Children      | under 18 years          |                     |
| Uematsu 2017   | Prediction of pneumonia hospitalization in adults using health checkup data                                                                                                                                                       | NHI/LSEHS |     | National Health Insurance and Long-Life Medical Care Insurance              | Prefecture | kyoto                            | 2010 | 2015                                      | Prediction model                          | Clinical epidemiology, course of diseases | Diseases of the respiratory system        | Certain infectious and parasitic diseases                                         | pneumonia     | Others                  | aged 40 to 74 years |
| Uematsu 2016   | The economic burden of methicillin-resistant Staphylococcus aureus in community-onset pneumonia inpatients                                                                                                                        | DPC       |     | Nationwide                                                                  |            | 2013                             | 2014 | Clinical epidemiology, course of diseases | Health economics                          | Diseases of the respiratory system        | Certain infectious and parasitic diseases | pneumonia                                                                         | Others        | age 18 years or older   |                     |
| Uematsu 2014   | Impact of guideline-concordant microbiological testing on outcomes of pneumonia                                                                                                                                                   | DPC       |     | Nationwide                                                                  |            | 2010                             | 2011 | Intervention effect                       | Quality of care                           | Diseases of the respiratory system        |                                           | pneumonia (ICD-10: J10- J18)                                                      | Others        | aged 18 years or older  |                     |
| Uematsu 2014   | Development of a risk-adjusted in-hospital mortality prediction model for community-acquired pneumonia: a retrospective analysis using a Japanese administrative database                                                         | DPC       |     | Nationwide                                                                  |            | 2012                             | 2013 | Prediction model                          | Clinical epidemiology, course of diseases | Diseases of the respiratory system        |                                           | pneumonia (ICD-10: J10-J18)                                                       | Others        | aged >14 years          |                     |
| Amin 2020      | Capturing the trends in hospital standardized mortality ratios for pneumonia: a retrospective observational study in Japan (2010 to 2018)                                                                                         | DPC       |     | Medi-Target benchmarking project: AJHA                                      | Nationwide | 2010                             | 2018 | Clinical epidemiology, course of diseases |                                           | Diseases of the respiratory system        | Certain infectious and parasitic diseases | pneumonia                                                                         |               |                         |                     |
| Kishimoto 2017 | Sivelestat sodium and mortality in pneumonia patients requiring mechanical ventilation: propensity score analysis of a Japanese nationwide database                                                                               | DPC       |     | Nationwide                                                                  |            | 2012                             | 2014 | Intervention effect                       |                                           | Diseases of the respiratory system        |                                           | pneumonia requiring mechanical ventilation                                        |               |                         |                     |
| Ota 2019       | Age distribution and seasonality in acute eosinophilic pneumonia: analysis using a national inpatient database                                                                                                                    | DPC       |     | Nationwide                                                                  |            | 2010                             | 2015 | Clinical epidemiology, course of diseases |                                           | Diseases of the respiratory system        |                                           | eosinophilic pneumonia (J82)                                                      |               |                         |                     |
| Tateda 2014    | [Risk factors for the development of pneumonia: analysis of Japanese claims data]                                                                                                                                                 | JMDC      |     | Nationwide                                                                  |            | 2005                             | 2012 | Clinical epidemiology, course of diseases |                                           | Diseases of the respiratory system        |                                           | pneumonia                                                                         |               | age categories          |                     |
| Sakamoto 2017  | Guidelines-concordant empiric antimicrobial therapy and mortality in patients with severe community-acquired pneumonia requiring mechanical ventilation                                                                           | DPC       |     | Nationwide                                                                  |            | 2012                             | 2014 | Intervention effect                       | Quality of care                           | Diseases of the respiratory system        |                                           | community-acquired pneumonia, antimicrobial therapy                               | Others        | aged over 20 years      |                     |

|                                                |                                                                                                                                                                                                                                                             |           |                                                                                                   |              |                                 |      |                                           |                                           |                                    |                                                                                                     |                                                                             |               |                                     |
|------------------------------------------------|-------------------------------------------------------------------------------------------------------------------------------------------------------------------------------------------------------------------------------------------------------------|-----------|---------------------------------------------------------------------------------------------------|--------------|---------------------------------|------|-------------------------------------------|-------------------------------------------|------------------------------------|-----------------------------------------------------------------------------------------------------|-----------------------------------------------------------------------------|---------------|-------------------------------------|
| Jo 2017                                        | Association between dementia and discharge status in patients hospitalized with pneumonia                                                                                                                                                                   | DPC       |                                                                                                   | Nationwide   | 2010                            | 2014 | Clinical epidemiology, course of diseases |                                           | Diseases of the respiratory system | Mental, Behavioral and Neurodevelopmental disorders                                                 | pneumonia, dementia (F00-F03 or G30)                                        | Older persons | aged ≥60 years                      |
| Hiyama 2018                                    | The three peaks in age distribution of females with pneumothorax: a nationwide database study in Japan                                                                                                                                                      | DPC       |                                                                                                   | Nationwide   | 2010                            | 2016 | Clinical epidemiology, course of diseases |                                           | Diseases of the respiratory system | Diseases of the genitourinary system                                                                | pneumothorax or Catamenial pneumothorax (ICD-10 code: J93, N948)            |               | age categories                      |
| Imanaka 2019                                   | An analysis of factors associated with compliance and dropout of sublingual immunotherapy on Japanese cedar pollinosis patients                                                                                                                             | JMDC      |                                                                                                   | Nationwide   | 2014                            | 2016 | Patient health service utilization        |                                           | Diseases of the respiratory system |                                                                                                     | cedar pollinosis                                                            |               | age group                           |
| Ono 2020                                       | Relationship Between Severe Respiratory Depression and Codeine-Containing Antitussives in Children: A Nested Case-Control Study                                                                                                                             | JMDC      |                                                                                                   | Nationwide   | 2012                            | 2015 | Intervention effect                       | Clinical epidemiology, course of diseases | Diseases of the respiratory system |                                                                                                     | respiratory depression                                                      | Children      | children younger than 18 years      |
| Kido 2017                                      | Efficacy of early sivelestat administration on acute lung injury and acute respiratory distress syndrome                                                                                                                                                    | DPC       |                                                                                                   | Nationwide   | 2012                            | 2012 | Intervention effect                       |                                           | Diseases of the respiratory system |                                                                                                     | acute lung injury and acute respiratory distress syndrome (ICD-10 code J80) |               |                                     |
| Kido 2018                                      | The relationship between high-dose corticosteroid treatment and mortality in acute respiratory distress syndrome: a retrospective and observational study using a nationwide administrative database in Japan                                               | DPC       |                                                                                                   | Nationwide   | 2012                            | 2012 | Intervention effect                       |                                           | Diseases of the respiratory system |                                                                                                     | acute respiratory distress syndrome (ICD-10 code J80)                       |               |                                     |
| Takekuma 2019                                  | Factors associated with severe postoperative acute respiratory failure requiring high dose corticosteroid therapy                                                                                                                                           | DPC       |                                                                                                   | Nationwide   | 2012                            | 2013 | Clinical epidemiology, course of diseases |                                           | Diseases of the respiratory system | Injury, poisoning and certain other consequences of external causes                                 | postoperative acute respiratory failure                                     | Others        | aged ≥20 years                      |
| Kikuchi 2020                                   | [The Prescription of Oral Antibiotics for Acute Respiratory Tract Infection in Pediatric Outpatients at Acute Diagnosis Procedure Combination Hospitals (2013-2018)]                                                                                        | MDV       |                                                                                                   | Nationwide   | 2013                            | 2018 | Medical treatment status                  |                                           | Diseases of the respiratory system |                                                                                                     | acute respiratory tract infection                                           | Children      | aged 0 to 14 years                  |
| Yoshida 2018                                   | Prescription of antibiotics to pre-school children from 2005 to 2014 in Japan: a retrospective claims database study                                                                                                                                        | JMDC      |                                                                                                   | Nationwide   | 2005                            | 2014 | Medical treatment status                  |                                           | Diseases of the respiratory system | Others                                                                                              | antibiotics, upper respiratory infections                                   | Children      | birth to 6 years of age             |
| Tsuzuki 2020                                   | Cost of inappropriate antimicrobial use for upper respiratory infection in Japan                                                                                                                                                                            | JMDC      |                                                                                                   | Nationwide   | 2013                            | 2016 | Health economics                          | Medical treatment status                  | Diseases of the respiratory system |                                                                                                     | upper respiratory infection                                                 | Others        | under the age of 65 years           |
| Matsuda 2018                                   | [Big data analysis of medical and nursing care: An analysis of the current status of antimicrobial agent use for acute upper respiratory tract inflammation using data on health insurance claims]*                                                         | NHI/LSEHS | medical insurance claims (The National Health Insurance system and Late Elders' Health Insurance) | Others       | A municipality in Western Japan | 2015 | 2015                                      | Medical treatment status                  | Diseases of the respiratory system |                                                                                                     | acute upper respiratory infection                                           |               | all age groups                      |
| Koyama 2020                                    | Antibiotic prescriptions for Japanese outpatients with acute respiratory tract infections (2013-2015): A retrospective Observational Study                                                                                                                  | JMDC      |                                                                                                   | Nationwide   | 2013                            | 2015 | Medical treatment status                  |                                           | Diseases of the respiratory system |                                                                                                     | acute respiratory tract infections                                          |               | age category                        |
| Muraki 2020                                    | Impact of antimicrobial stewardship fee on prescribing for Japanese pediatric patients with upper respiratory infections                                                                                                                                    | Others    | IQVIA Claims                                                                                      | Nationwide   | 2017                            | 2018 | Health policy evaluation and utilization  | Medical treatment status                  | Diseases of the respiratory system |                                                                                                     | Upper respiratory tract infection                                           | Children      | <15 year of age                     |
| Okubo 2020                                     | National trends in appropriate antibiotic use among pediatric inpatients with uncomplicated lower respiratory tract infections in Japan                                                                                                                     | DPC       |                                                                                                   | Nationwide   | 2010                            | 2015 | Medical treatment status                  |                                           | Diseases of the respiratory system | Certain infectious and parasitic diseases                                                           | acute lower respiratory tract infections                                    | Children      | 3 month-15 year of age              |
| Sugiyama 2020                                  | [Prescription of Oral Antibacterial Drugs to Outpatients with Acute Respiratory Tract Infection and Acute Diarrhea : The Survey Based on Medical Data Using MDV analyzer]                                                                                   | MDV       |                                                                                                   | Nationwide   | 2013                            | 2019 | Medical treatment status                  |                                           | Diseases of the respiratory system | Certain infectious and parasitic diseases                                                           | Acute respiratory tract infection, Acute diarrhea                           |               |                                     |
| Hashimoto 2019                                 | Antibiotic prescription among outpatients in a prefecture of Japan, 2012-2013: a retrospective claims database study                                                                                                                                        | NHI/LSEHS | national or late elders' health insurance system                                                  | Prefecture   | Kumamoto                        | 2012 | 2013                                      | Medical treatment status                  | Diseases of the respiratory system | Certain infectious and parasitic diseases                                                           | Acute respiratory tract infections, Gastrointestinal infections             |               |                                     |
| Kimura 2019                                    | Longitudinal trends of and factors associated with inappropriate antibiotic prescribing for non-bacterial acute respiratory tract infection in Japan: A retrospective claims database study, 2012-2017                                                      | JMDC      |                                                                                                   | Nationwide   | 2012                            | 2017 | Medical treatment status                  |                                           | Diseases of the respiratory system | Certain infectious and parasitic diseases                                                           | non-bacterial acute respiratory tract infection                             |               | age groups                          |
| Teratani 2019                                  | Pattern of antibiotic prescriptions for outpatients with acute respiratory tract infections in Japan, 2013-15: a retrospective observational study                                                                                                          | JMDC      |                                                                                                   | Nationwide   | 2013                            | 2015 | Medical treatment status                  |                                           | Diseases of the respiratory system |                                                                                                     | acute respiratory tract infections                                          | Others        | ≤74 year of age                     |
| Uda 2019                                       | Nationwide survey of indications for oral antimicrobial prescription for pediatric patients from 2013 to 2016 in Japan                                                                                                                                      | NDB       |                                                                                                   | Nationwide   | 2013                            | 2016 | Medical treatment status                  | Health policy evaluation and utilization  | Diseases of the respiratory system | Certain infectious and parasitic diseases                                                           | respiratory infections                                                      | Children      | ≤15 year of age                     |
| Wada 2013                                      | Practice patterns for lower respiratory tract infections in hospital patients with particular focus on bacteriological examinations and injection antibiotics use                                                                                           | JMDC      |                                                                                                   | Nationwide   | 2004                            | 2007 | Medical treatment status                  | Quality of care                           | Diseases of the respiratory system |                                                                                                     | Lower respiratory tract infections                                          | Others        | aged 16 years or older              |
| Suzuki 2015                                    | Complication rates after functional endoscopic sinus surgery: analysis of 50,734 Japanese patients                                                                                                                                                          | DPC       |                                                                                                   | Nationwide   | 2007                            | 2013 | Intervention effect                       |                                           | Diseases of the respiratory system |                                                                                                     | chronic sinusitis (ICD-10 code: J32x) or nasal polyps (J33x)                | Others        | aged ≥16 years                      |
| Koizumi 2019                                   | Outcomes of endoscopic sinus surgery for sinusitis-induced intracranial abscess in patients undergoing neurosurgery                                                                                                                                         | DPC       |                                                                                                   | Nationwide   | 2010                            | 2017 | Intervention effect                       |                                           | Diseases of the respiratory system | Diseases of the nervous system                                                                      | sinusitis-induced intracranial abscess                                      |               |                                     |
| Teratani 2019                                  | Association between rapid antigen detection tests and antibiotics for acute pharyngitis in Japan: A retrospective observational study                                                                                                                       | JMDC      |                                                                                                   | Nationwide   | 2013                            | 2015 | Medical treatment status                  | Quality of care                           | Diseases of the respiratory system |                                                                                                     | acute pharyngitis, acute tonsillitis                                        | Others        | ≤74 year of age                     |
| Miyamoto 2018                                  | Perioperative Steroid Use for Tonsillectomy and Its Association With Reoperation for Posttonsillectomy Hemorrhage: A Retrospective Cohort Study                                                                                                             | MDV       |                                                                                                   | Nationwide   | 2008                            | 2014 | Intervention effect                       |                                           | Diseases of the respiratory system | Others                                                                                              | tonsillectomy, posttonsillectomy hemorrhage                                 |               |                                     |
| 11) Diseases of the digestive system (K00-K93) |                                                                                                                                                                                                                                                             |           |                                                                                                   |              |                                 |      |                                           |                                           |                                    |                                                                                                     |                                                                             |               |                                     |
| Sato 2019                                      | Epidemiological analysis of achalasia in Japan using a large-scale claims database                                                                                                                                                                          | JMDC      |                                                                                                   | Nationwide   | 2005                            | 2017 | Clinical epidemiology, course of diseases | Medical treatment status                  | Diseases of the digestive system   |                                                                                                     | achalasia                                                                   |               |                                     |
| Ishii 2019                                     | Application of Large Electronic Medical Database for Detecting Undiagnosed Patients in the General Population                                                                                                                                               | NHI/LSEHS | national medical insurance record database                                                        | Municipality | Ishinomaki City                 | 2015 | 2017                                      | Medical treatment status                  | Diseases of the digestive system   |                                                                                                     | esophagogastric junction outflow obstruction (including achalasia)          | Others        | below 60 years old                  |
| Murata 2013                                    | Association between hospital volume and outcomes of elderly and non-elderly patients with acute biliary diseases: A national administrative database analysis                                                                                               | DPC       |                                                                                                   | Nationwide   | 2008                            | 2008 | Health policy evaluation and utilization  |                                           | Diseases of the digestive system   |                                                                                                     | acute biliary diseases                                                      | Others        | 50-74 years, aged 75 years or older |
| Tarasawa 2020                                  | Recombinant Human Soluble Thrombomodulin Contributes to a Reduction In-Hospital Mortality of Acute Cholangitis with Disseminated Intravascular Coagulation: A Propensity Score Analyses of a Japanese Nationwide Database                                   | DPC       |                                                                                                   | Nationwide   | 2012                            | 2018 | Intervention effect                       |                                           | Diseases of the digestive system   | Diseases of the blood and blood-forming organs and certain disorders involving the immune mechanism | acute cholangitis with disseminated intravascular coagulation               |               |                                     |
| Murata 2011                                    | An observational study using a national administrative database to determine the impact of hospital volume on compliance with clinical practice guidelines                                                                                                  | DPC       |                                                                                                   | Nationwide   | 2008                            | 2008 | Health policy evaluation and utilization  | Quality of care                           | Diseases of the digestive system   |                                                                                                     | acute cholangitis                                                           | Others        | aged ≥16 years                      |
| Murata 2010                                    | Impact of hospital volume on clinical outcomes of endoscopic biliary drainage for acute cholangitis based on the Japanese administrative database associated with the diagnosis procedure combination system                                                | DPC       |                                                                                                   | Nationwide   | 2008                            | 2008 | Intervention effect                       | Health policy evaluation and utilization  | Diseases of the digestive system   |                                                                                                     | acute cholangitis                                                           |               |                                     |
| Murata 2011                                    | Evaluation of compliance with the Tokyo Guidelines for the management of acute cholangitis based on the Japanese administrative database associated with the Diagnosis Procedure Combination system                                                         | DPC       |                                                                                                   | Nationwide   | 2008                            | 2008 | Quality of care                           |                                           | Diseases of the digestive system   |                                                                                                     | acute cholangitis                                                           | Others        | aged ≥16 years                      |
| Sekimoto 2010                                  | [Practice Guidelines for Acute Cholecystitis and Acute Cholangitis: Administrative Data (DPC data) to Examine Trends in Patient Characteristics, Process of care, Patient Outcomes, and Medical Resource Utilization for Patients with Acute Cholecystitis] | DPC       | QIP                                                                                               | Nationwide   | 2004                            | 2009 | Quality of care                           |                                           | Diseases of the digestive system   |                                                                                                     | acute cholecystitis (K800 K801 K804 K810)                                   |               |                                     |



|                |                                                                                                                                                                                                                                                         |           |                                                        |              |                                 |      |                                           |                                           |                                    |                                                                     |               |                                                        |
|----------------|---------------------------------------------------------------------------------------------------------------------------------------------------------------------------------------------------------------------------------------------------------|-----------|--------------------------------------------------------|--------------|---------------------------------|------|-------------------------------------------|-------------------------------------------|------------------------------------|---------------------------------------------------------------------|---------------|--------------------------------------------------------|
| Murata 2013    | Multivariate analysis of factors influencing length of hospitalization and medical costs of cholecystectomy for acute cholecystitis in Japan: a national database analysis                                                                              | DPC       |                                                        | Nationwide   | 2008                            | 2008 | Medical treatment status                  | Health economics                          | Diseases of the digestive system   | acute cholecystitis                                                 |               | age categories                                         |
| Murata 2012    | The care processes for acute cholecystitis according to clinical practice guidelines based on the Japanese administrative database                                                                                                                      | DPC       |                                                        | Nationwide   | 2008                            | 2008 | Quality of care                           |                                           | Diseases of the digestive system   | cholecystitis (K810)                                                | Others        | age ≥15 years                                          |
| Murata 2012    | [Preoperative antimicrobial therapy for patients with cholecystectomy for acute cholecystitis based on the administrative database associated with the Diagnosis Procedure Combination system]                                                          | DPC       |                                                        | Nationwide   | 2008                            | 2008 | Medical treatment status                  | Intervention effect                       | Diseases of the digestive system   | acute cholecystitis                                                 |               |                                                        |
| Murata 2013    | [An analysis of the current status of etiology and treatment in pediatric patients with acute pancreatitis from DPC data]*                                                                                                                              | DPC       |                                                        | Nationwide   | 2008                            | 2008 | Clinical epidemiology, course of diseases | Medical treatment status                  | Diseases of the digestive system   | acute pancreatitis                                                  | Children      | aged <15 years                                         |
| Murata 2015    | [Association between Hospitalization or Medical Costs and Severity of Acute Pancreatitis Based on the Diagnosis Procedure Combination Database]                                                                                                         | DPC       |                                                        | Nationwide   | 2010                            | 2012 | Medical treatment status                  | Health economics                          | Diseases of the digestive system   | acute pancreatitis                                                  |               |                                                        |
| Murata 2011    | [The circumstance of antimicrobial therapy for severe acute pancreatitis in elderly patients based on the administrative database associated with the Diagnosis Procedure Combination system]                                                           | DPC       |                                                        | Nationwide   | 2008                            | 2008 | Medical treatment status                  |                                           | Diseases of the digestive system   | acute pancreatitis                                                  | Older persons | aged 70 years and above                                |
| Ikeda Kurakawa | Effects of Prophylactic Antibiotics on Length of Stay and Total Costs for Pediatric Acute Pancreatitis: A Nationwide Database Study in Japan                                                                                                            | DPC       |                                                        | Nationwide   | 2010                            | 2017 | Intervention effect                       |                                           | Diseases of the digestive system   | acute pancreatitis (K85)                                            | Children      | <18 year of age                                        |
| Nakahara 2018  | Early prophylactic antibiotics for severe acute pancreatitis: A population-based cohort study using a nationwide database in Japan                                                                                                                      | DPC       |                                                        | Nationwide   | 2010                            | 2016 | Intervention effect                       |                                           | Diseases of the digestive system   | acute pancreatitis                                                  | Others        | ≥18 years old                                          |
| Endo 2018      | Impact of continuous regional arterial infusion in the treatment of acute necrotizing pancreatitis: analysis of a national administrative database                                                                                                      | DPC       |                                                        | Nationwide   | 2010                            | 2015 | Intervention effect                       |                                           | Diseases of the digestive system   | acute necrotizing pancreatitis (K85)                                | Others        | aged ≥16 years                                         |
| Hamada 2016    | No weekend effect on outcomes of severe acute pancreatitis in Japan: data from the diagnosis procedure combination database                                                                                                                             | DPC       |                                                        | Nationwide   | 2010                            | 2013 | Clinical epidemiology, course of diseases | Health policy evaluation and utilization  | Diseases of the digestive system   | severe acute pancreatitis (K85)                                     | Others        | aged ≥20 years                                         |
| Murata 2011    | A descriptive study evaluating the circumstances of medical treatment for acute pancreatitis before publication of the new JPN guidelines based on the Japanese administrative database associated with the Diagnosis Procedure Combination system      | DPC       |                                                        | Nationwide   | 2008                            | 2008 | Medical treatment status                  | Quality of care                           | Diseases of the digestive system   | acute pancreatitis                                                  |               |                                                        |
| Taguchi 2014   | Body mass index influences the outcome of acute pancreatitis: An analysis based on the Japanese administrative database                                                                                                                                 | DPC       |                                                        | Nationwide   | 2010                            | 2010 | Clinical epidemiology, course of diseases |                                           | Diseases of the digestive system   | acute pancreatitis                                                  | Others        | aged ≥20 years                                         |
| Yasunaga 2013  | Effect and cost of treatment for acute pancreatitis with or without gabexate mesylate: a propensity score analysis using a nationwide administrative database                                                                                           | DPC       |                                                        | Nationwide   | 2010                            | 2010 | Intervention effect                       | Health economics                          | Diseases of the digestive system   | acute pancreatitis                                                  | Others        | aged ≥20 years                                         |
| Iwasawa 2020   | Influence of co-initiation of antiulcer drugs on persistence and adherence to low-dose aspirin: A retrospective cohort study using a Japanese claims database                                                                                           | JMDC      |                                                        | Nationwide   | 2005                            | 2016 | Patient health service utilization        |                                           | Diseases of the digestive system   | Others                                                              |               | low-dose aspirin, co-initiation of antiulcer drugs     |
| Iwasawa 2019   | Adherence to guidelines for antiulcer drug prescription in patients receiving low-dose aspirin therapy in Japan                                                                                                                                         | JMDC      |                                                        | Nationwide   | 2005                            | 2016 | Medical treatment status                  | Quality of care                           | Diseases of the digestive system   | Others                                                              |               | antiulcer drug (low-dose aspirin therapy in Japan)     |
| Hamada 2015    | Severe bleeding after percutaneous transhepatic drainage of the biliary system: effect of antithrombotic agents--analysis of 34 606 cases from a Japanese nationwide administrative database                                                            | DPC       | DPC Research Group                                     | Nationwide   | 2007                            | 2012 | Intervention effect                       |                                           | Diseases of the digestive system   | biliary disease                                                     | Others        | 20 years and older                                     |
| Takeuchi 2015  | Descriptive epidemiology of children hospitalized for inflammatory bowel disease in Japan: Inpatient database analysis                                                                                                                                  | DPC       |                                                        | Nationwide   | 2007                            | 2010 | Clinical epidemiology, course of diseases |                                           | Diseases of the digestive system   | Inflammatory bowel disease                                          | Children      | ≤18 years old                                          |
| Hosomi 2018    | An integrative approach using real-world data to identify alternative therapeutic uses of existing drugs                                                                                                                                                | JMDC      | FAERS: adverse events, NextBio: transcriptome data     | Nationwide   | 2005                            | 2016 | Research methodology                      |                                           | Diseases of the digestive system   | Inflammatory bowel disease (Crohn's disease and ulcerative colitis) |               |                                                        |
| Wing 2018      | Incidence of catheter-related complications among Japanese patients with central venous catheters as well as patients with short bowel syndrome                                                                                                         | MDV       |                                                        | Nationwide   | 2008                            | 2016 | Intervention effect                       |                                           | Diseases of the digestive system   | Short bowel syndrome                                                |               | age group                                              |
| Kobayashi 2020 | Lack of Increased Risk of Lymphoma by Thiopurines or Biologics in Japanese Patients with Inflammatory Bowel Disease: A Large-Scale Administrative Database Analysis                                                                                     | MDV       |                                                        | Nationwide   | 2008                            | 2018 | Clinical epidemiology, course of diseases | Intervention effect                       | Diseases of the digestive system   | Neoplasms                                                           |               | Inflammatory bowel disease, lymphoma                   |
| Sugihara 2013  | Does mechanical bowel preparation improve quality of laparoscopic nephrectomy? Propensity score-matched analysis in Japanese series                                                                                                                     | DPC       |                                                        | Nationwide   | 2008                            | 2010 | Intervention effect                       |                                           | Diseases of the digestive system   | Diseases of the genitourinary system                                |               | mechanical bowel preparation, laparoscopic nephrectomy |
| Fujiogi 2018   | Postoperative Small Bowel Obstruction Following Laparoscopic or Open Fundoplication in Children: A Retrospective Analysis Using a Nationwide Database                                                                                                   | DPC       |                                                        | Nationwide   | 2010                            | 2016 | Intervention effect                       |                                           | Diseases of the digestive system   | Injury, poisoning and certain other consequences of external causes | Children      | aged 0-18 years                                        |
| Takeyama 2021  | Association of diagnostic delay with medical cost for patients with Crohn's disease: A Japanese claims-based cohort study                                                                                                                               | JMDC      |                                                        | Nationwide   | 2005                            | 2018 | Medical treatment status                  | Health economics                          | Diseases of the digestive system   | Chron's disease                                                     |               |                                                        |
| Yokoyama 2016  | A Retrospective Claims Database Study on Drug Utilization in Japanese Patients with Crohn's Disease Treated with Adalimumab or Infliximab                                                                                                               | JMDC      |                                                        | Nationwide   | 2012                            | 2015 | Intervention effect                       | Medical treatment status                  | Diseases of the digestive system   | crohn's disease (K50)                                               |               |                                                        |
| Murata 2020    | Relationship Between the Number of Occlusal Supporting and Medical Cost: Analysis Using Large Claims Database from Employee Health Care Insurance in Japan                                                                                              | JMDC      |                                                        | Nationwide   | 2016                            | 2017 | Health economics                          |                                           | Diseases of the digestive system   | gingivitis or periodontal                                           | Others        | aged over 20 years                                     |
| Ueno 2020      | [Differences in Annual Use of Medical and Dental Treatment and Cost among workers of Different Business Types: Data on Insured Persons Registered with the Japan Health Insurance Association Osaka Branch]                                             | JHIA      | Japan Health Insurance Association Osaka Branch        | Prefecture   | Osaka                           | 2015 | 2016                                      | Health economics                          | Patient health service utilization | Diseases of the digestive system                                    |               | dental treatment                                       |
| Tsuneishi 2016 | [Association between Number of Teeth and Medical and Dental Care Expenditure: Analysis Using the Receipt and Health Checkup Information Database in Japan]                                                                                              | NDB       |                                                        | Nationwide   | 2012                            | 2013 | Health economics                          |                                           | Diseases of the digestive system   | periodontal disease                                                 | Others        | 40 years of age or older                               |
| Saito 2018     | Type of dental visit and number of remaining teeth in Japanese elders                                                                                                                                                                                   | NHI/LSEHS |                                                        | Prefecture   | Mie                             | 2014 | 2014                                      | Intervention effect                       | Diseases of the digestive system   | remaining teeth                                                     | Older persons | 75 or 80 years                                         |
| Murata 2018    | [Big data analysis of medical and nursing care: An analysis of the current status of oral care for the elderly requiring long-term care]*                                                                                                               | NHI/LSEHS | medical insurance claims and LTC insurance claims data | Others       | A municipality in Western Japan | 2012 | 2016                                      | Intervention effect                       | Medical treatment status           | Diseases of the digestive system                                    | Older persons | Older People                                           |
| Saito 2018     | [The relationship between the number of teeth and medical expenses of elderly people: Based on the results of dental checkups and data on health insurance claims from the Mie Prefecture Advanced Elderly Medical Care Interdisciplinary Association]* | NHI/LSEHS | Dental checkup data                                    | Prefecture   | Mie                             | 2014 | 2014                                      | Health economics                          | Diseases of the digestive system   | teeth number                                                        | Older persons | 75 and 80 years old                                    |
| Yoshiuchi 2011 | [Survey of dental treatment expenditures based on medical expense data of dental status and general health of the elderly in Hokkaido]                                                                                                                  | NHI/LSEHS | NHI                                                    | Prefecture   | Hokkaido                        | 2007 | 2007                                      | Clinical epidemiology, course of diseases | Health economics                   | Diseases of the digestive system                                    |               | dental status                                          |
| Nishide 2017   | Income-Related Inequalities in Access to Dental Care Services in Japan                                                                                                                                                                                  | NHI/LSEHS | NHI                                                    | Municipality | Chiba City                      | 2014 | 2015                                      | Patient health service utilization        | Socioeconomic comparison           | Diseases of the digestive system                                    |               | dental care service                                    |
| Tsuneishi 2019 | [The presence of teeth type using the dental notation of periodontitis patients: a cross-sectional study using the receipt and health checkup information database in Japan]                                                                            | NDB       | Survey of Dental Disease (MHLW)                        | Nationwide   | 2016                            | 2016 | Clinical epidemiology, course of diseases | Research methodology                      | Diseases of the digestive system   | Periodontitis                                                       | Others        | aged ≥20 years                                         |
| Miwa 2016      | Medical cost, incidence rate, and treatment status of gastroesophageal reflux disease in Japan: analysis of claims data                                                                                                                                 | JMDC      |                                                        | Nationwide   | 2005                            | 2015 | Clinical epidemiology, course of diseases | Health economics                          | Diseases of the digestive system   | gastroesophageal reflux disease                                     |               | all ages                                               |

|                  |                                                                                                                                                                                                                                                                      |           |                                                                           |            |                                 |                                           |                                           |                                  |                                                                     |                                                                            |
|------------------|----------------------------------------------------------------------------------------------------------------------------------------------------------------------------------------------------------------------------------------------------------------------|-----------|---------------------------------------------------------------------------|------------|---------------------------------|-------------------------------------------|-------------------------------------------|----------------------------------|---------------------------------------------------------------------|----------------------------------------------------------------------------|
| Murata 2015      | The changing patterns of dispensing branded and generic drugs for the treatment of gastroesophageal reflux disease between 2006 and 2011 in Japan: a retrospective cohort study                                                                                      | JMDC      | Nationwide                                                                | 2006       | 2011                            | Medical treatment status                  | Health policy evaluation and utilization  | Diseases of the digestive system | gastroesophageal reflux disease                                     |                                                                            |
| Miyamoto 2020    | The Effect of Carbazochrome Sodium Sulfonate in Patients with Colonic Diverticular Bleeding: Propensity Score Matching Analyses Using a Nationwide Inpatient Database                                                                                                | DPC       | Nationwide                                                                | 2010       | 2018                            | Intervention effect                       | Health economics                          | Diseases of the digestive system | patients with colonic diverticular bleeding (ICD-10: K57.3)         | Others excluded ≤17 years of age                                           |
| Fujimoto 2021    | Decline incidence in upper gastrointestinal bleeding in several recent years: data of the Japan claims database of 13 million accumulated patients                                                                                                                   | JMDC      | Nationwide                                                                | 2009       | 2014                            | Clinical epidemiology, course of diseases |                                           | Diseases of the digestive system | upper gastrointestinal bleeding                                     | Others 20-74 years of age                                                  |
| Miyakuni 2020    | Angiography versus colonoscopy in patients with severe lower gastrointestinal bleeding: a nation-wide observational study                                                                                                                                            | DPC       | Nationwide                                                                | 2010       | 2017                            | Intervention effect                       |                                           | Diseases of the digestive system | severe lower gastrointestinal bleeding                              | Others aged ≥16 years                                                      |
| Miyamoto 2020    | Effect of tranexamic acid in patients with colonic diverticular bleeding: A nationwide inpatient database study                                                                                                                                                      | DPC       | Nationwide                                                                | 2010       | 2018                            | Intervention effect                       |                                           | Diseases of the digestive system | colonic diverticular bleeding                                       | Others aged ≥18 years                                                      |
| Moroi 2020       | Efficacy of urgent colonoscopy for colonic diverticular bleeding: A propensity score-matched analysis using a nationwide database in Japan                                                                                                                           | DPC       | Nationwide                                                                | 2016       | 2019                            | Intervention effect                       |                                           | Diseases of the digestive system | colonic diverticular bleeding                                       | age categories                                                             |
| Niikura 2015     | Factors affecting in-hospital mortality in patients with lower gastrointestinal tract bleeding: a retrospective study using a national database in Japan                                                                                                             | DPC       | Nationwide                                                                | 2010       | 2012                            | Clinical epidemiology, course of diseases |                                           | Diseases of the digestive system | gastrointestinal tract bleeding                                     |                                                                            |
| Murata 2011      | Equivalent clinical outcomes of bleeding peptic ulcers in teaching and non-teaching hospitals: evidence for standardization of medical care in Japan                                                                                                                 | DPC       | Nationwide                                                                | 2008       | 2008                            | Quality of care                           | Health policy evaluation and utilization  | Diseases of the digestive system | bleeding peptic ulcers                                              |                                                                            |
| Nagata 2018      | Therapeutic endoscopy-related GI bleeding and thromboembolic events in patients using warfarin or direct oral anticoagulants: results from a large nationwide database analysis                                                                                      | DPC       | Nationwide                                                                | 2014       | 2015                            | Intervention effect                       |                                           | Diseases of the digestive system | Diseases of the circulatory system                                  | GI bleeding and thromboembolic events                                      |
| Nagata 2018      | [High Risk Therapeutic Endoscopy: Related Gastrointestinal Bleeding and Thromboembolic Events in Patients Using Warfarin or Direct Oral Anticoagulants]                                                                                                              | DPC       | Nationwide                                                                | 2014       | 2015                            | Intervention effect                       |                                           | Diseases of the digestive system | Diseases of the circulatory system                                  | Gastrointestinal Bleeding and Thromboembolic events                        |
| Kondo 2020       | Follow-up Analysis after Colorectal Polypectomy on Claims Data                                                                                                                                                                                                       | JMDC      | Nationwide                                                                | 2005       | 2017                            | Intervention effect                       |                                           | Diseases of the digestive system | Colorectal Polypectomy                                              | Others age ≥40 years, <70 years                                            |
| Imai 2021        | Healthcare utilization associated with adherence to antibiotics for abdominal surgeries in Japan: cross-sectional analysis of administrative database                                                                                                                | DPC       | Nationwide                                                                | 2014       | 2016                            | Quality of care                           | Health economics                          | Diseases of the digestive system | abdominal surgeries                                                 | Others aged 15 years and older                                             |
| Otake 2021       | Associations between early parenteral nutrition and in-hospital outcomes in underweight patients with gastrointestinal surgery                                                                                                                                       | DPC       | Nationwide                                                                | 2010       | 2018                            | Intervention effect                       |                                           | Diseases of the digestive system | patients with gastrointestinal surgery                              | Others ≥18 year of age                                                     |
| Tsuchiya 2019    | Nationwide observational study of mortality from complicated intra-abdominal infections and the role of bacterial cultures                                                                                                                                           | DPC       | Nationwide                                                                | 2014       | 2016                            | Intervention effect                       |                                           | Diseases of the digestive system | complicated intra-abdominal infection                               | Others ≥18 year of age                                                     |
| Abe 2021         | Prevention of delayed bleeding with vonoprazan in upper gastrointestinal endoscopic treatment                                                                                                                                                                        | DPC       | Nationwide                                                                | 2014       | 2019                            | Intervention effect                       |                                           | Diseases of the digestive system | delayed bleeding, upper gastrointestinal endoscopic treatment       | Others aged ≥20 years                                                      |
| Shimizu 2016     | [Analysis of the complications that arose in cases of digestive tract hemostasis based on diagnosis procedure combination survey data]                                                                                                                               | DPC       | Nationwide                                                                | 2006       | 2008                            | Clinical epidemiology, course of diseases | Health economics                          | Diseases of the digestive system | digestive tract hemostasis                                          |                                                                            |
| Seta 2019        | Status of use of protease inhibitors for the prevention and treatment of pancreatitis after endoscopic retrograde cholangiopancreatography: An epidemiologic analysis of the evidence-practice gap using a health insurance claims database                          | JMDC      | Nationwide                                                                | 2005       | 2015                            | Medical treatment status                  | Quality of care                           | Diseases of the digestive system | endoscopic retrograde cholangiopancreatography                      |                                                                            |
| Sugisaki 2018    | A case-control study of the risk of upper gastrointestinal mucosal injuries in patients prescribed concurrent NSAIDs and antithrombotic drugs based on data from the Japanese national claims database of 13 million accumulated patients                            | JMDC      | Nationwide                                                                | 2009       | 2014                            | Intervention effect                       |                                           | Diseases of the digestive system | upper gastrointestinal mucosal injuries                             | Others aged 20-74 years                                                    |
| Takada 2013      | [Study on Risk of Gastrointestinal Complications in Low-dose Aspirin Therapy Using the National Receipt Database]                                                                                                                                                    | NDB       | Nationwide                                                                | 2010       | 2010                            | Intervention effect                       |                                           | Diseases of the digestive system | Others                                                              | Gastrointestinal Complications, Low-dose Aspirin Therapy                   |
| Matsuda 2018     | [Big data analysis of medical and nursing care: Attribute analysis of gastrostomy patients using data on health insurance claims in medical and nursing care]*                                                                                                       | NHI/LSEHS | medical insurance claims and LTC insurance claims data                    | Others     | A municipality in Western Japan | 2008                                      | 2016                                      | Medical treatment status         | Diseases of the digestive system                                    | gastrostomy                                                                |
| Sako 2014        | Prevalence and in-hospital mortality of gastrostomy and jejunostomy in Japan: a retrospective study with a national administrative database                                                                                                                          | DPC       | Nationwide                                                                | 2007       | 2010                            | Medical treatment status                  | Intervention effect                       | Diseases of the digestive system | gastrostomy and jejunostomy                                         |                                                                            |
| Okada 2020       | Outcomes of lactulose plus branched-chain amino acid infusion and lactulose alone for hepatic encephalopathy: A retrospective cohort study using a national inpatient database                                                                                       | DPC       | Nationwide                                                                | 2011       | 2017                            | Intervention effect                       |                                           | Diseases of the digestive system | Certain infectious and parasitic diseases                           | hepatic encephalopathy (ICD-10 codes, B18-19, I85, K70-77)                 |
| Tsuchiya 2018    | Mortality and Morbidity After Hartmann's Procedure Versus Primary Anastomosis Without a Diverting Stoma for Colorectal Perforation: A Nationwide Observational Study                                                                                                 | DPC       | Nationwide                                                                | 2010       | 2014                            | Intervention effect                       |                                           | Diseases of the digestive system | colorectal perforation                                              | Others age of 15 years or older                                            |
| Odagiri 2015     | Factors associated with perforation related to diagnostic balloon-assisted enteroscopy: analysis of a national inpatient database in Japan                                                                                                                           | DPC       | Nationwide                                                                | 2007       | 2013                            | Clinical epidemiology, course of diseases | Intervention effect                       | Diseases of the digestive system | Injury, poisoning and certain other consequences of external causes | perforation related to diagnostic balloon-assisted enteroscopy             |
| Odagiri 2015     | Hospital volume and the occurrence of bleeding and perforation after colorectal endoscopic submucosal dissection: analysis of a national administrative database in Japan                                                                                            | DPC       | Nationwide                                                                | 2012       | 2013                            | Health policy evaluation and utilization  |                                           | Diseases of the digestive system | Injury, poisoning and certain other consequences of external causes | bleeding and perforation after colorectal endoscopic submucosal dissection |
| Yoshihara 2021   | Association between prophylactic antibiotic use for transarterial chemoembolization and occurrence of liver abscess: a retrospective cohort study                                                                                                                    | DPC       | Nationwide                                                                | 2010       | 2017                            | Intervention effect                       |                                           | Diseases of the digestive system | Others                                                              | liver abscess, transarterial chemoembolization                             |
| Yatsushashi 2020 | Prevalence of ascites and its treatment in inpatients with liver cirrhosis: A cohort study using a Japanese medical claims database                                                                                                                                  | MDV       | Nationwide                                                                | 2008       | 2018                            | Clinical epidemiology, course of diseases | Medical treatment status                  | Diseases of the digestive system | liver cirrhosis (K70-74), ascites                                   | Others aged ≥20 years                                                      |
| Sato 2017        | The ADOPT-LC score: a novel predictive index of in-hospital mortality of cirrhotic patients following surgical procedures, based on a national survey                                                                                                                | DPC       | Nationwide                                                                | 2010       | 2012                            | Prediction model                          | Clinical epidemiology, course of diseases | Diseases of the digestive system | cirrhotic                                                           |                                                                            |
| Yatsushashi 2021 | Real-world hospital mortality of liver cirrhosis inpatients in Japan: a large-scale cohort study using a medical claims database: Prognosis of liver cirrhosis                                                                                                       | MDV       | Nationwide                                                                | 2011       | 2018                            | Clinical epidemiology, course of diseases | Intervention effect                       | Diseases of the digestive system | Certain infectious and parasitic diseases                           | liver cirrhosis                                                            |
| Hanatani 2014    | A detection algorithm for drug-induced liver injury in medical information databases using the Japanese diagnostic scale and its comparison with the Council for International Organizations of Medical Sciences/the Roussel Uclaf Causality Assessment Method scale | Others    | MDV, medical information databases from the Hamamatsu University Hospital | Nationwide | (Hamamatsu University Hospital) | 2007                                      | 2012                                      | Research methodology             | Diseases of the digestive system                                    | Drug-induced liver injury                                                  |
| Hasegawa 2021    | High Healthcare Cost Burden for Liver Cirrhosis(LC) and Hepatocellular Carcinoma(HCC) Progression within Nonalcoholic Fatty Liver Disease(NAFLD) or Nonalcoholic Steatohepatitis(NASH) Patients in Japan: a Real-world Data Study Using a Claims Database            | JMDC      | Nationwide                                                                | 2005       | 2019                            | Health economics                          |                                           | Diseases of the digestive system | Neoplasms                                                           | NAFLD, NASH, liver cirrhosis, hepatocellular carcinoma                     |
| Sato 2014        | Acute liver disease in Japan: a nationwide analysis of the Japanese Diagnosis Procedure Combination database                                                                                                                                                         | DPC       | Nationwide                                                                | 2007       | 2010                            | Clinical epidemiology, course of diseases |                                           | Diseases of the digestive system | acute liver disease                                                 |                                                                            |

|                                                                                   |                                                                                                                                                                                                                                                          |           |                                                          |            |                            |      |                                           |                                           |                                                              |                                                                     |                                                                                |               |                           |
|-----------------------------------------------------------------------------------|----------------------------------------------------------------------------------------------------------------------------------------------------------------------------------------------------------------------------------------------------------|-----------|----------------------------------------------------------|------------|----------------------------|------|-------------------------------------------|-------------------------------------------|--------------------------------------------------------------|---------------------------------------------------------------------|--------------------------------------------------------------------------------|---------------|---------------------------|
| Terai 2021                                                                        | Comorbidities and healthcare costs and resource use of patients with nonalcoholic fatty liver disease (NAFLD) and nonalcoholic steatohepatitis (NASH) in the Japan medical data vision database                                                          | MDV       |                                                          | Nationwide | 2011                       | 2018 | Clinical epidemiology, course of diseases | Health economics                          | Diseases of the digestive system                             |                                                                     | nonalcoholic fatty liver disease and nonalcoholic steatohepatitis              | Others        | aged ≥18 years            |
| Takiguchi 2020                                                                    | Vasodilator Therapy and Mortality in Nonocclusive Mesenteric Ischemia: A Nationwide Observational Study                                                                                                                                                  | DPC       |                                                          | Nationwide | 2010                       | 2018 | Intervention effect                       |                                           | Diseases of the digestive system                             |                                                                     | Nonocclusive Mesenteric Ischemia (K550)                                        |               |                           |
| Yoshioka 2014                                                                     | Impact of hospital volume on hospital mortality, length of stay and total costs after pancreaticoduodenectomy                                                                                                                                            | DPC       |                                                          | Nationwide | 2007                       | 2010 | Health policy evaluation and utilization  |                                           | Diseases of the digestive system                             |                                                                     | Pancreaticoduodenectomy                                                        |               |                           |
| Hayashi 2020                                                                      | Clinical Effect of the Acrylonitrile-Co-Methylol Sulfonate Surface-Treated Membrane as a Cytokine Adsorption Therapy for Sepsis due to Acute Panperitonitis: A Retrospective Cohort Study                                                                | DPC       |                                                          | Nationwide | 2014                       | 2017 | Intervention effect                       |                                           | Diseases of the digestive system                             | Certain infectious and parasitic diseases                           | sepsis due to panperitonitis                                                   | Others        | ≥18 year of age           |
| Fujiogi 2019                                                                      | Outcomes following laparoscopic versus open surgery for pediatric inguinal hernia repair: Analysis using a national inpatient database in Japan                                                                                                          | DPC       |                                                          | Nationwide | 2010                       | 2016 | Intervention effect                       |                                           | Diseases of the digestive system                             |                                                                     | primary inguinal hernia                                                        | Children      | aged 7 days to 15 years   |
| Nakashima 2019                                                                    | Laparoscopic versus open repair for inguinal hernia in children: a retrospective cohort study                                                                                                                                                            | JMDC      |                                                          | Nationwide | 2005                       | 2017 | Intervention effect                       |                                           | Diseases of the digestive system                             |                                                                     | primary inguinal hernia                                                        | Children      | younger than 15 years old |
| Okumura 2018                                                                      | Impact of Drain Insertion After Perforated Peptic Ulcer Repair in a Japanese Nationwide Database Analysis                                                                                                                                                | DPC       | QIP                                                      | Nationwide | 2010                       | 2016 | Intervention effect                       |                                           | Diseases of the digestive system                             |                                                                     | perforated gastric/duodenal ulcers                                             |               |                           |
| Hern 2020                                                                         | Cost-Effectiveness Analysis of Vedolizumab Compared with Other Biologics in Anti-TNF-Naive Patients with Moderate-to-Severe Ulcerative Colitis in Japan                                                                                                  | JMDC      | A systematic literature review and network meta-analysis | Nationwide | 2018                       | 2018 | Health economics                          |                                           | Diseases of the digestive system                             |                                                                     | Ulcerative Colitis                                                             |               |                           |
| Okayasu 2019                                                                      | Use of corticosteroids for remission induction therapy in patients with new-onset ulcerative colitis in real-world settings                                                                                                                              | JMDC      |                                                          | Nationwide | 2008                       | 2014 | Medical treatment status                  | Quality of care                           | Diseases of the digestive system                             |                                                                     | ulcerative colitis (ICD-10 code: K51)                                          |               |                           |
| Moroi 2021                                                                        | The clinical practice of ulcerative colitis in elderly patients: An investigation using a nationwide database in Japan                                                                                                                                   | DPC       |                                                          | Nationwide | 2012                       | 2018 | Medical treatment status                  | Clinical epidemiology, course of diseases | Diseases of the digestive system                             |                                                                     | Ulcerative colitis                                                             |               |                           |
| Kobayashi 2020                                                                    | Impact of immunomodulator use on treatment persistence in patients with ulcerative colitis: A claims database analysis                                                                                                                                   | JMDC      |                                                          | Nationwide | 2010                       | 2016 | Intervention effect                       | Patient health service utilization        | Diseases of the digestive system                             |                                                                     | ulcerative colitis (K51)                                                       | Others        | aged ≥18 years            |
| Matsuoka 2021                                                                     | Trends in Corticosteroid Prescriptions for Ulcerative Colitis and Factors Associated with Long-Term Corticosteroid Use: Analysis Using Japanese Claims Data from 2006 to 2016                                                                            | JMDC      |                                                          | Nationwide | 2006                       | 2016 | Medical treatment status                  | Quality of care                           | Diseases of the digestive system                             |                                                                     | Ulcerative Colitis                                                             |               |                           |
| Miyazaki 2021                                                                     | Real-World Prescription Pattern and Healthcare Cost Among Patients with Ulcerative Colitis in Japan: A Retrospective Claims Data Analysis                                                                                                                | JMDC      |                                                          | Nationwide | 2009                       | 2018 | Medical treatment status                  | Health economics                          | Diseases of the digestive system                             |                                                                     | Ulcerative Colitis                                                             |               |                           |
| Sato 2015                                                                         | Variceal hemorrhage: Analysis of 9987 cases from a Japanese nationwide database                                                                                                                                                                          | DPC       |                                                          | Nationwide | 2007                       | 2012 | Clinical epidemiology, course of diseases |                                           | Diseases of the digestive system                             | Diseases of the circulatory system                                  | variceal hemorrhage                                                            |               |                           |
| <b>12) Diseases of the skin and subcutaneous tissue (L00-L99)</b>                 |                                                                                                                                                                                                                                                          |           |                                                          |            |                            |      |                                           |                                           |                                                              |                                                                     |                                                                                |               |                           |
| Kawahara 2019                                                                     | [Relationship between Treatment for Allergic Diseases and Medical Expenses: The Influence That Treatment Difference of Atopic Dermatitis of Dermatologist and Pediatrician Gives to Medical Expenses]                                                    | JMDC      |                                                          | Nationwide | 2010                       | 2011 | Medical treatment status                  | Health economics                          | Diseases of the skin and subcutaneous tissue                 |                                                                     | atopic dermatitis                                                              | Children      | aged <15 years            |
| Komura 2018                                                                       | Economic assessment of actual prescription of drugs for treatment of atopic dermatitis: Differences between dermatology and pediatrics in large-scale receipt data                                                                                       | JMDC      |                                                          | Nationwide | 2010                       | 2011 | Medical treatment status                  | Health economics                          | Diseases of the skin and subcutaneous tissue                 |                                                                     | atopic dermatitis                                                              | Children      | aged 0-14 years           |
| Igarashi 2019                                                                     | Health-care resource use and current treatment of adult atopic dermatitis patients in Japan: A retrospective claims database analysis                                                                                                                    | JMDC      |                                                          | Nationwide | 2013                       | 2016 | Medical treatment status                  | Health economics                          | Diseases of the skin and subcutaneous tissue                 |                                                                     | atopic dermatitis                                                              | Others        | 15-60 year of age         |
| Sugimoto 2018                                                                     | Contact Dermatitis after Prescription of an Ophthalmic Ointment Containing Fradiomycin Sulfate: A Retrospective Database Study Using Japanese Health Insurance Claims Data                                                                               | Others    | MinaCare HDB                                             | Nationwide | 2013                       | 2013 | Intervention effect                       |                                           | Diseases of the skin and subcutaneous tissue                 |                                                                     | contact dermatitis                                                             |               | age group                 |
| Terui 2018                                                                        | [Analysis of Real World Data on Epidemiological Characteristics of Hidradenitis Suppurativa in Japan]                                                                                                                                                    | JMDC      |                                                          | Nationwide | 2015                       | 2016 | Clinical epidemiology, course of diseases | Medical treatment status                  | Diseases of the skin and subcutaneous tissue                 |                                                                     | hidradenitis suppurativa                                                       | Others        | aged 15-64 years          |
| Suwanai 2020                                                                      | Dipeptidyl Peptidase-4 Inhibitor Reduces the Risk of Developing Hypertrophic Scars and Keloids following Median Sternotomy in Diabetic Patients: A Nationwide Retrospective Cohort Study Using the National Database of Health Insurance Claims of Japan | NDB       |                                                          | Nationwide | 2013                       | 2015 | Intervention effect                       |                                           | Diseases of the skin and subcutaneous tissue                 |                                                                     | hypertrophic scars or keloids                                                  |               |                           |
| Kubota 2015                                                                       | Epidemiology of psoriasis and palmoplantar pustulosis: a nationwide study using the Japanese national claims database                                                                                                                                    | NDB       |                                                          | Nationwide | 2010                       | 2011 | Clinical epidemiology, course of diseases |                                           | Diseases of the skin and subcutaneous tissue                 |                                                                     | psoriasis and palmoplantar pustulosis                                          |               | age group                 |
| Miyazaki 2020                                                                     | Treatment patterns and healthcare resource utilization in palmoplantar pustulosis patients in Japan: A claims database study                                                                                                                             | JMDC      |                                                          | Nationwide | 2011                       | 2017 | Medical treatment status                  | Health economics                          | Diseases of the skin and subcutaneous tissue                 |                                                                     | Palmoplantar pustulosis (PPP)                                                  | Others        | age ≥18 years             |
| Nakagami 2020                                                                     | Association between pressure injury status and hospital discharge to home: a retrospective observational cohort study using a national inpatient database                                                                                                | DPC       |                                                          | Nationwide | 2014                       | 2014 | Clinical epidemiology, course of diseases | Health policy evaluation and utilization  | Diseases of the skin and subcutaneous tissue                 |                                                                     | pressure injury                                                                | Older persons | aged 65 years or older    |
| Sruamsiri 2018                                                                    | Persistence rates and medical costs of biological therapies for psoriasis treatment in Japan: a real-world data study using a claims database                                                                                                            | JMDC      |                                                          | Nationwide | 2009                       | 2016 | Patient health service utilization        | Health economics                          | Diseases of the skin and subcutaneous tissue                 |                                                                     | psoriasis (L40)                                                                |               |                           |
| Inui 2021                                                                         | Treatment practices and costs among patients with psoriatic arthritis: A Japanese hospital claims database analysis                                                                                                                                      | MDV       |                                                          | Nationwide | 2009                       | 2017 | Medical treatment status                  | Health economics                          | Diseases of the skin and subcutaneous tissue                 |                                                                     | psoriatic arthritis (L40.50, L40.51, L40.52, L40.53, L40.54, and L40.59)       |               |                           |
| Terui 2014                                                                        | [A survey of the status of psoriasis conducted using information obtained from health insurance claims provided by health insurance societies]                                                                                                           | JMDC      |                                                          | Nationwide | 2011                       | 2012 | Clinical epidemiology, course of diseases | Medical treatment status                  | Diseases of the skin and subcutaneous tissue                 |                                                                     | psoriasis                                                                      |               |                           |
| Makino 2015                                                                       | [Identifying the Pattern of Physician Consultation for Skin Diseases in Kumamoto Prefecture, from the National Health Insurance Claims, during May of 2009]                                                                                              | NHI/LSEHS | NHI                                                      | Prefecture | Kumamoto                   | 2009 | 2009                                      | Patient health service utilization        | Socioeconomic comparison                                     | Diseases of the skin and subcutaneous tissue                        | Skin diseases                                                                  |               |                           |
| Sato 2020                                                                         | Real-world evidence of population differences in allopurinol-related severe cutaneous adverse reactions in East Asians: A population-based cohort study                                                                                                  | JMDC      |                                                          | Nationwide | Taiwan, South Korea, Japan | 2005 | 2016                                      | Intervention effect                       | Clinical epidemiology, course of diseases                    | Diseases of the skin and subcutaneous tissue                        | allopurinol-related severe cutaneous adverse reactions                         |               |                           |
| Fukasawa 2021                                                                     | Risk of Stevens-Johnson syndrome and toxic epidermal necrolysis associated with anticonvulsants in a Japanese population: Matched case-control and cohort studies                                                                                        | JMDC      |                                                          | Nationwide | 2005                       | 2017 | Intervention effect                       |                                           | Diseases of the skin and subcutaneous tissue                 |                                                                     | anticonvulsant-induced Stevens-Johnson syndrome and toxic epidermal necrolysis |               |                           |
| Morita 2019                                                                       | Association of Early Systemic Corticosteroid Therapy with Mortality in Patients with Stevens-Johnson Syndrome or Toxic Epidermal Necrolysis: A Retrospective Cohort Study Using a Nationwide Claims Database                                             | DPC       |                                                          | Nationwide | 2010                       | 2014 | Intervention effect                       |                                           | Diseases of the skin and subcutaneous tissue                 |                                                                     | Steven-Johnson syndrome, toxic epidermal necrolysis (ICD-10 codes L511-L512)   | Others        | aged ≥18 years            |
| <b>13) Diseases of the musculoskeletal system and connective tissue (M00-M99)</b> |                                                                                                                                                                                                                                                          |           |                                                          |            |                            |      |                                           |                                           |                                                              |                                                                     |                                                                                |               |                           |
| Kawata 2018                                                                       | Atopic dermatitis is a novel demographic risk factor for surgical site infection after anterior cruciate ligament reconstruction                                                                                                                         | DPC       |                                                          | Nationwide | 2010                       | 2015 | Clinical epidemiology, course of diseases |                                           | Diseases of the musculoskeletal system and connective tissue | Injury, poisoning and certain other consequences of external causes | anterior cruciate ligament reconstruction, surgical site infection             |               | age categories            |
| Sakai 2019                                                                        | Risk of opportunistic infections in patients with antineutrophil cytoplasmic antibody-associated vasculitis, using a Japanese health insurance database                                                                                                  | MDV       |                                                          | Nationwide | 2008                       | 2017 | Clinical epidemiology, course of diseases |                                           | Diseases of the musculoskeletal system and connective tissue |                                                                     | antineutrophil cytoplasmic antibody-associated vasculitis                      |               |                           |

|                   |                                                                                                                                                                                                                                                      |        |                                                  |            |                 |      |                                           |                                           |                                                              |                                                                                                     |                                                                                           |               |                           |
|-------------------|------------------------------------------------------------------------------------------------------------------------------------------------------------------------------------------------------------------------------------------------------|--------|--------------------------------------------------|------------|-----------------|------|-------------------------------------------|-------------------------------------------|--------------------------------------------------------------|-----------------------------------------------------------------------------------------------------|-------------------------------------------------------------------------------------------|---------------|---------------------------|
| Uechi 2018        | Effect of plasma exchange on in-hospital mortality in patients with pulmonary hemorrhage secondary to antineutrophil cytoplasmic antibody-associated vasculitis: A propensity-matched analysis using a nationwide administrative database            | DPC    |                                                  | Nationwide | 2009            | 2014 | Intervention effect                       |                                           | Diseases of the musculoskeletal system and connective tissue | Others                                                                                              | Antineutrophil cytoplasmic antibody-associated vasculitis, secondary pulmonary hemorrhage |               |                           |
| Kumamaru 2019     | Large hospital variation in the utilization of Post-procedural CT to detect pulmonary embolism/Deep Vein Thrombosis in Patients Undergoing Total Knee or Hip Replacement Surgery: Japanese Nationwide Diagnosis Procedure Combination Database Study | DPC    |                                                  | Nationwide | 2012            | 2013 | Medical treatment status                  | Health policy evaluation and utilization  | Diseases of the musculoskeletal system and connective tissue | Diseases of the circulatory system                                                                  | venous thromboembolism, total knee or hip replacement                                     | Others        | aged ≥40 years            |
| Nagase 2011       | Risk factors for pulmonary embolism and the effects of fondaparinux after total hip and knee arthroplasty: a retrospective observational study with use of a national database in Japan                                                              | DPC    |                                                  | Nationwide | 2007            | 2008 | Clinical epidemiology, course of diseases | Intervention effect                       | Diseases of the musculoskeletal system and connective tissue | Diseases of the circulatory system                                                                  | total hip and knee arthroplasty, pulmonary embolism                                       |               |                           |
| Matsumoto 2016    | Time trends and risk factors for perioperative complications in total ankle arthroplasty: retrospective analysis using a national database in Japan                                                                                                  | DPC    |                                                  | Nationwide | 2007            | 2013 | Clinical epidemiology, course of diseases | Medical treatment status                  | Diseases of the musculoskeletal system and connective tissue | Injury, poisoning and certain other consequences of external causes                                 | Total ankle arthroplasty, end-stage ankle arthritis                                       |               |                           |
| Yamagami 2021     | Unicompartmental knee arthroplasty is associated with lower proportions of surgical site infection compared with total knee arthroplasty: A retrospective nationwide database study                                                                  | DPC    |                                                  | Nationwide | 2010            | 2017 | Clinical epidemiology, course of diseases | Intervention effect                       | Diseases of the musculoskeletal system and connective tissue | Injury, poisoning and certain other consequences of external causes                                 | surgical site infection, Knee arthroplasty                                                | Others        | 16-102 year of age        |
| Morishita 2020    | Comparison of Perioperative Complications Between Anterior Decompression With Fusion and Laminoplasty For Cervical Spondylotic Myelopathy: Propensity Score-matching Analysis Using Japanese Diagnosis Procedure Combination Database                | DPC    |                                                  | Nationwide | 2010            | 2016 | Intervention effect                       | Health economics                          | Diseases of the musculoskeletal system and connective tissue |                                                                                                     | cervical spondylotic myelopathy                                                           |               |                           |
| Sumitani 2014     | Perioperative factors affecting the occurrence of acute complex regional pain syndrome following limb bone fracture surgery: data from the Japanese Diagnosis Procedure Combination database                                                         | DPC    |                                                  | Nationwide | 2007            | 2010 | Clinical epidemiology, course of diseases |                                           | Diseases of the musculoskeletal system and connective tissue | Injury, poisoning and certain other consequences of external causes                                 | Complex regional pain syndrome, fractures                                                 |               |                           |
| Ishikawa 2021     | Estimation of treatment and prognostic factors of pneumocystis pneumonia in patients with connective tissue diseases                                                                                                                                 | DPC    |                                                  | Nationwide | 2014            | 2016 | Clinical epidemiology, course of diseases |                                           | Diseases of the musculoskeletal system and connective tissue | Certain infectious and parasitic diseases                                                           | connective tissue disease- associated pneumocystis pneumonia                              |               |                           |
| Hasegawa 2015     | Factors that predict in-hospital mortality in eosinophilic granulomatosis with polyangiitis                                                                                                                                                          | DPC    |                                                  | Nationwide | 2010            | 2013 | Clinical epidemiology, course of diseases |                                           | Diseases of the musculoskeletal system and connective tissue |                                                                                                     | Eosinophilic granulomatosis with polyangiitis (ICD-10 code, M30.1)                        |               |                           |
| Sugihara 2012     | Impact of surgical intervention timing on the case fatality rate for Fournier's gangrene: an analysis of 379 cases                                                                                                                                   | DPC    |                                                  | Nationwide | 2007            | 2010 | Intervention effect                       |                                           | Diseases of the musculoskeletal system and connective tissue |                                                                                                     | Fournier's gangrene (ICD-10 code, M72.6)                                                  |               |                           |
| Ohara 2020        | Fracture risk increased by concurrent use of central nervous system agents in older people: Nationwide case-crossover study                                                                                                                          | NDB    |                                                  | Nationwide | 2013            | 2014 | Intervention effect                       |                                           | Diseases of the musculoskeletal system and connective tissue | Injury, poisoning and certain other consequences of external causes                                 | fragility fracture                                                                        | Older persons | aged ≥65 years            |
| Ohara 2020        | Central Nervous System Agent Classes and Fragility Fracture Risk among Elderly Japanese Individuals in a Nationwide Case-Crossover Design Study                                                                                                      | NDB    |                                                  | Nationwide | 2013            | 2014 | Intervention effect                       |                                           | Diseases of the musculoskeletal system and connective tissue | Injury, poisoning and certain other consequences of external causes                                 | fragility fracture                                                                        | Older persons | aged ≥65 years            |
| Iihara 2019       | Fragility Fractures in Older People in Japan Based on the National Health Insurance Claims Database                                                                                                                                                  | NDB    |                                                  | Nationwide | 2013            | 2014 | Clinical epidemiology, course of diseases |                                           | Diseases of the musculoskeletal system and connective tissue | Injury, poisoning and certain other consequences of external causes                                 | Fragility Fractures                                                                       | Older persons | aged 65 years or older    |
| Hakoda 2020       | [Future trends for the number of gout patients in Japan]                                                                                                                                                                                             | JMDC   | Comprehensive Survey of Living Conditions (MHLW) | Nationwide | 2010            | 2014 | Clinical epidemiology, course of diseases |                                           | Diseases of the musculoskeletal system and connective tissue |                                                                                                     | gout patients                                                                             |               |                           |
| Koto 2021         | Factors associated with achieving target serum uric acid level and occurrence of gouty arthritis: A retrospective observational study of Japanese health insurance claims data                                                                       | JMDC   |                                                  | Nationwide | 2015            | 2017 | Clinical epidemiology, course of diseases | Medical treatment status                  | Diseases of the musculoskeletal system and connective tissue |                                                                                                     | gouty arthritis                                                                           | Others        | 18-65 years old           |
| Kawata 2021       | Type of bone graft and primary diagnosis were associated with nosocomial surgical site infection after high tibial osteotomy: analysis of a national database                                                                                        | DPC    |                                                  | Nationwide | 2010            | 2017 | Clinical epidemiology, course of diseases |                                           | Diseases of the musculoskeletal system and connective tissue | Injury, poisoning and certain other consequences of external causes                                 | surgical site infection after high tibial osteotomy                                       |               |                           |
| Okubo 2020        | The Impact of Changes in Clinical Guideline on Practice Patterns and Healthcare Utilizations for Kawasaki Disease in Japan                                                                                                                           | DPC    |                                                  | Nationwide | 2010            | 2015 | Medical treatment status                  | Health policy evaluation and utilization  | Diseases of the musculoskeletal system and connective tissue |                                                                                                     | Kawasaki disease (ICD-10 code: M30.3)                                                     | Children      | aged under 18 years       |
| Okubo 2018        | Association Between Dose of Glucocorticoids and Coronary Artery Lesions in Kawasaki Disease                                                                                                                                                          | DPC    |                                                  | Nationwide | 2010            | 2015 | Intervention effect                       |                                           | Diseases of the musculoskeletal system and connective tissue |                                                                                                     | Kawasaki Disease (M30.3)                                                                  | Children      | aged <18 years            |
| Takeuchi 2018     | Changes in Hemoglobin Concentrations Post-immunoglobulin Therapy in Patients with Kawasaki Disease: A Population-Based Study Using a Claims Database in Japan                                                                                        | MDV    |                                                  | Nationwide | 2010            | 2016 | Intervention effect                       |                                           | Diseases of the musculoskeletal system and connective tissue | Diseases of the blood and blood-forming organs and certain disorders involving the immune mechanism | Kawasaki Disease (M30.3), anemia                                                          | Children      | aged ≥18 years            |
| Kumamaru 2018     | Radiologist involvement is associated with reduced use of MRI in the acute period of low back pain in a non-elderly population                                                                                                                       | Others | MinaCare                                         | Nationwide | 2013            | 2015 | Medical treatment status                  | Health policy evaluation and utilization  | Diseases of the musculoskeletal system and connective tissue |                                                                                                     | low-back pain                                                                             | Others        | aged 18-64 years          |
| Ohya 2016         | Does the microendoscopic technique reduce mortality and major complications in patients undergoing lumbar discectomy? A propensity score-matched analysis using a nationwide administrative database                                                 | DPC    |                                                  | Nationwide | 2010            | 2013 | Intervention effect                       |                                           | Diseases of the musculoskeletal system and connective tissue |                                                                                                     | lumbar discectomy                                                                         |               |                           |
| Kawata 2018       | Annual Trends in arthroscopic meniscus surgery: Analysis of a national database in Japan                                                                                                                                                             | DPC    |                                                  | Nationwide | 2007            | 2015 | Medical treatment status                  |                                           | Diseases of the musculoskeletal system and connective tissue |                                                                                                     | meniscus surgery                                                                          |               |                           |
| Chang 2013        | Assessment of statin-associated muscle toxicity in Japan: a cohort study conducted using claims database and laboratory information                                                                                                                  | MDV    |                                                  | Nationwide | 2004            | 2010 | Intervention effect                       |                                           | Diseases of the musculoskeletal system and connective tissue |                                                                                                     | muscle toxicity                                                                           | Others        | aged 18 or above          |
| Uehara 2014       | Necrotising soft-tissue infections of the upper limb: risk factors for amputation and death                                                                                                                                                          | DPC    |                                                  | Nationwide | 2007            | 2010 | Clinical epidemiology, course of diseases |                                           | Diseases of the musculoskeletal system and connective tissue |                                                                                                     | Necrotising soft-tissue infections (M72.6)                                                |               |                           |
| Suzuki 2021       | Factors associated with mortality among patients with necrotizing soft tissue infections: An analysis of 4597 cases using the Diagnosis Procedure Combination Database                                                                               | DPC    |                                                  | Nationwide | 2014            | 2017 | Clinical epidemiology, course of diseases |                                           | Diseases of the musculoskeletal system and connective tissue |                                                                                                     | necrotizing soft-tissue infection                                                         |               |                           |
| Ebata-Kogure 2020 | Treatment and Healthcare Cost Among Patients with Hip or Knee Osteoarthritis: A Cross-sectional Study Using a Real-world Claims Database in Japan Between 2013 and 2019                                                                              | MDV    |                                                  | Nationwide | 2013            | 2019 | Medical treatment status                  | Health economics                          | Diseases of the musculoskeletal system and connective tissue |                                                                                                     | hip or knee osteoarthritis                                                                | Others        | aged ≥18 years            |
| Ueda 2020         | Long-Term Pain Management and Health Care Resource Use Among an Employed Population in Japan with Knee Osteoarthritis Combined with Low Back Pain                                                                                                    | JMDC   |                                                  | Nationwide | 2011            | 2012 | Health economics                          | Medical treatment status                  | Diseases of the musculoskeletal system and connective tissue |                                                                                                     | knee osteoarthritis (ICD-10-CM code M17)                                                  | Others        | more than 40 years of age |
| Ueda 2020         | Longitudinal Assessment of Pain Management Among the Employed Japanese Population with Knee Osteoarthritis                                                                                                                                           | JMDC   |                                                  | Nationwide | 2011            | 2012 | Clinical epidemiology, course of diseases | Medical treatment status                  | Diseases of the musculoskeletal system and connective tissue |                                                                                                     | knee osteoarthritis (ICD-10-CM code M17)                                                  | Others        | aged over 40 years        |
| Sakai 2019        | International descriptive study for comparison of treatment patterns in patients with knee osteoarthritis between Korea and Japan using claims data                                                                                                  | JMDC   |                                                  | Nationwide | Korea and Japan | 2012 | 2013                                      | Medical treatment status                  | Socioeconomic comparison                                     | Diseases of the musculoskeletal system and connective tissue                                        | knee osteoarthritis                                                                       | Others        | aged ≥50 years            |
| Akazawa 2019      | Patterns of drug treatment in patients with osteoarthritis and chronic low back pain in Japan: a retrospective database study                                                                                                                        | MDV    |                                                  | Nationwide | 2013            | 2017 | Medical treatment status                  | Clinical epidemiology, course of diseases | Diseases of the musculoskeletal system and connective tissue |                                                                                                     | osteoarthritis /chronic low back pain                                                     | Others        | ≥18 year of age           |
| Kawata 2017       | Annual trends in knee arthroplasty and tibial osteotomy: Analysis of a national database in Japan                                                                                                                                                    | DPC    |                                                  | Nationwide | 2007            | 2015 | Medical treatment status                  |                                           | Diseases of the musculoskeletal system and connective tissue |                                                                                                     | Osteoarthritis, osteonecrosis, rheumatoid arthritis                                       |               | age groups                |
| Kikuchi 2021      | A Retrospective Database Study of Gastrointestinal Events and Medical Costs Associated with Nonsteroidal Anti-Inflammatory Drugs in Japanese Patients of Working Age with Osteoarthritis and Chronic Low Back Pain                                   | JMDC   |                                                  | Nationwide | 2009            | 2018 | Intervention effect                       | Health economics                          | Diseases of the musculoskeletal system and connective tissue | Diseases of the digestive system                                                                    | osteoarthritis, chronic low back pain, gastrointestinal events                            | Others        | aged ≥18 years            |

|                  |                                                                                                                                                                                                                                                    |           |                                                                                                                                          |              |                                           |      |      |                                           |                                    |                                                              |                                                                     |                                                                                           |               |                        |
|------------------|----------------------------------------------------------------------------------------------------------------------------------------------------------------------------------------------------------------------------------------------------|-----------|------------------------------------------------------------------------------------------------------------------------------------------|--------------|-------------------------------------------|------|------|-------------------------------------------|------------------------------------|--------------------------------------------------------------|---------------------------------------------------------------------|-------------------------------------------------------------------------------------------|---------------|------------------------|
| Sakai 2019       | Coding and prescription rates of osteoporosis are low among distal radius fracture patients in Japan                                                                                                                                               | JMDC      |                                                                                                                                          | Nationwide   |                                           | 2014 | 2015 | Medical treatment status                  | Quality of care                    | Diseases of the musculoskeletal system and connective tissue |                                                                     | osteoporosis (ICD10: M819), distal radius fracture (S525, S526)                           | Others        | aged 50-75 years       |
| Tanaka 2018      | Real-world evidence of raloxifene versus alendronate in preventing non-vertebral fractures in Japanese women with osteoporosis: retrospective analysis of a hospital claims database                                                               | MDV       |                                                                                                                                          | Nationwide   |                                           | 2008 | 2013 | Intervention effect                       |                                    | Diseases of the musculoskeletal system and connective tissue |                                                                     | osteoporosis, non-vertebral fractures                                                     | Others        | aged 50 years or older |
| Usui 2018        | Persistence of and switches from teriparatide treatment among women and men with osteoporosis in the real world: a claims database analysis                                                                                                        | JMDC      |                                                                                                                                          | Nationwide   |                                           | 2005 | 2017 | Medical treatment status                  | Patient health service utilization | Diseases of the musculoskeletal system and connective tissue |                                                                     | osteoporosis (ICD-10 codes: M80 or M81)                                                   |               |                        |
| Burge 2016       | Real-world clinical and economic outcomes for daily teriparatide patients in Japan                                                                                                                                                                 | MDV       |                                                                                                                                          | Nationwide   |                                           | 2008 | 2013 | Medical treatment status                  | Health economics                   | Diseases of the musculoskeletal system and connective tissue |                                                                     | osteoporosis                                                                              |               |                        |
| Fujimori 2019    | [Analysis of the persistence and compliance of switching medications for osteoporosis using E-claim database]                                                                                                                                      | NHI/LSEHS | National Health Insurance and the late-stage medical care system                                                                         | Prefecture   | Hokkaido                                  | 2014 | 2016 | Medical treatment status                  | Patient health service utilization | Diseases of the musculoskeletal system and connective tissue |                                                                     | osteoporosis                                                                              | Others        | aged 50 years or older |
| Fujimori 2019    | [Analysis of the persistence and compliance of medications for osteoporosis using E-claim database]                                                                                                                                                | NHI/LSEHS | National Health Insurance and the late-stage medical care system                                                                         | Prefecture   | Hokkaido                                  | 2014 | 2015 | Patient health service utilization        |                                    | Diseases of the musculoskeletal system and connective tissue |                                                                     | osteoporosis                                                                              | Others        | aged 50 years or older |
| Yamanaka 2019    | [What is the current state of osteoporosis in terms of medical costs? Considering the current state of osteoporosis in communities from the National Health Insurance data system]*                                                                | NHI/LSEHS | long-term care insurance data                                                                                                            | Municipality | Higashiroshima city                       | 2016 | 2016 | Clinical epidemiology, course of diseases |                                    | Diseases of the musculoskeletal system and connective tissue |                                                                     | Osteoporosis                                                                              |               |                        |
| Yokoyama 2020    | Association between oral anticoagulants and osteoporosis: Real-world data mining using a multi-methodological approach                                                                                                                             | JMDC      | FAERS                                                                                                                                    | Nationwide   |                                           | 2005 | 2017 | Intervention effect                       |                                    | Diseases of the musculoskeletal system and connective tissue | Others                                                              | osteoporosis and antimicrobial use                                                        |               |                        |
| Taguchi 2018     | Treatment costs and cost drivers among osteoporotic fracture patients in Japan: a retrospective database analysis                                                                                                                                  | MDV       |                                                                                                                                          | Nationwide   |                                           | 2008 | 2017 | Health economics                          |                                    | Diseases of the musculoskeletal system and connective tissue | Injury, poisoning and certain other consequences of external causes | osteoporotic fracture                                                                     | Others        | 50 years and older     |
| Morishita 2020   | Risk factors related to perioperative systemic complications and mortality in elderly patients with osteoporotic vertebral fractures-analysis of a large national inpatient database                                                               | DPC       |                                                                                                                                          | Nationwide   |                                           | 2012 | 2016 | Clinical epidemiology, course of diseases |                                    | Diseases of the musculoskeletal system and connective tissue | Injury, poisoning and certain other consequences of external causes | osteoporotic vertebral fractures                                                          | Older persons | over 65 years old      |
| Fujimori 2020    | [Association of the medications for osteoporosis and the hip fracture using E-claim database]                                                                                                                                                      | NHI/LSEHS | The National Health Insurance system and Late Elders' Health Insurance                                                                   | Prefecture   | Hokkaido                                  | 2014 | 2018 | Intervention effect                       |                                    | Diseases of the musculoskeletal system and connective tissue | Injury, poisoning and certain other consequences of external causes | osteoporosis, hip fracture                                                                | Older persons | 60 years old and older |
| Kirigaya 2011    | Management and treatment of osteoporosis in patients receiving long-term glucocorticoid treatment: current status of adherence to clinical guidelines and related factors                                                                          | JMDC      |                                                                                                                                          | Nationwide   |                                           | 2004 | 2007 | Quality of care                           |                                    | Diseases of the musculoskeletal system and connective tissue | Endocrine, nutritional and metabolic diseases                       | Osteoporosis, glucocorticoid treatment                                                    | Others        | aged ≥18 years         |
| Shiragami 2014   | [Cost effectiveness of using medical topical adhesive patches for peritendinitis patients]                                                                                                                                                         | Others    | JammNet                                                                                                                                  | Nationwide   |                                           | 2010 | 2012 | Health economics                          |                                    | Diseases of the musculoskeletal system and connective tissue |                                                                     | peritendinitis                                                                            |               |                        |
| Morishita 2019   | Perioperative complications of anterior decompression with fusion versus laminoplasty for the treatment of cervical ossification of the posterior longitudinal ligament: propensity score matching analysis using a nation-wide inpatient database | DPC       |                                                                                                                                          | Nationwide   |                                           | 2010 | 2016 | Intervention effect                       |                                    | Diseases of the musculoskeletal system and connective tissue | Injury, poisoning and certain other consequences of external causes | Perioperative complications, cervical ossification of the posterior longitudinal ligament |               |                        |
| Sruamsiri 2018   | Persistence with Biological Disease-modifying Antirheumatic Drugs and Its Associated Resource Utilization and Costs                                                                                                                                | MDV       |                                                                                                                                          | Nationwide   |                                           | 2009 | 2015 | Patient health service utilization        | Health economics                   | Diseases of the musculoskeletal system and connective tissue |                                                                     | rheumatoid arthritis                                                                      | Others        | aged ≥18 years         |
| Sugiyama 2016    | Treatment Patterns, Direct Cost of Biologics, and Direct Medical Costs for Rheumatoid Arthritis Patients: A Real-world Analysis of Nationwide Japanese Claims Data                                                                                 | JMDC      |                                                                                                                                          | Nationwide   |                                           | 2005 | 2014 | Medical treatment status                  | Health economics                   | Diseases of the musculoskeletal system and connective tissue |                                                                     | Rheumatoid arthritis                                                                      | Others        | aged 16 to <75 years   |
| Nakajima 2021    | Geographic variations in rheumatoid arthritis treatment in Japan: A nationwide retrospective study using the national database of health insurance claims and specific health checkups of Japan                                                    | NDB       |                                                                                                                                          | Nationwide   |                                           | 2017 | 2018 | Medical treatment status                  | Socioeconomic comparison           | Diseases of the musculoskeletal system and connective tissue |                                                                     | rheumatoid arthritis                                                                      | Others        | 16 years old or older  |
| Lane 2020        | Risk of hydroxychloroquine alone and in combination with azithromycin in the treatment of rheumatoid arthritis: a multinational, retrospective study                                                                                               | JMDC      | Data comprised 14 sources of claims data or electronic medical records from Germany, Japan, the Netherlands, Spain, the UK, and the USA. | Nationwide   |                                           | 2000 | 2020 | Intervention effect                       |                                    | Diseases of the musculoskeletal system and connective tissue |                                                                     | rheumatoid arthritis                                                                      | Others        | 18 years or older      |
| Nakajima 2020    | Prevalence of patients with rheumatoid arthritis and age-stratified trends in clinical characteristics and treatment, based on the National Database of Health Insurance Claims and Specific Health Checkups of Japan                              | NDB       |                                                                                                                                          | Nationwide   |                                           | 2017 | 2018 | Clinical epidemiology, course of diseases | Medical treatment status           | Diseases of the musculoskeletal system and connective tissue |                                                                     | rheumatoid arthritis                                                                      | Others        | aged ≥16 years         |
| Yamairi 2020     | Dose Adjustment of Methotrexate Administered Concomitantly with Golimumab for Rheumatoid Arthritis in Japanese Real-World Clinical Settings                                                                                                        | JMDC      |                                                                                                                                          | Nationwide   |                                           | 2005 | 2018 | Intervention effect                       |                                    | Diseases of the musculoskeletal system and connective tissue |                                                                     | Rheumatoid arthritis (M05, M06, and M080)                                                 |               |                        |
| Kasai 2019       | Higher risk of hospitalized infection, cardiovascular disease, and fracture in patients with rheumatoid arthritis determined using the Japanese health insurance database                                                                          | JMDC      |                                                                                                                                          | Nationwide   |                                           | 2005 | 2014 | Clinical epidemiology, course of diseases |                                    | Diseases of the musculoskeletal system and connective tissue |                                                                     | Rheumatoid arthritis                                                                      | Others        | aged ≥18 years         |
| Takabayashi 2019 | Comparing the effectiveness of biological disease-modifying antirheumatic drugs using real-world data                                                                                                                                              | Others    | 13 Japanese national university hospitals' claims data (Clinical Information Statistical Analysis (CISA))                                | Nationwide   | 13 Japanese national university hospitals | 2005 | 2016 | Intervention effect                       |                                    | Diseases of the musculoskeletal system and connective tissue |                                                                     | rheumatoid arthritis                                                                      |               |                        |
| Mahlich 2017     | Treatment patterns of rheumatoid arthritis in Japanese hospitals and predictors of the initiation of biologic agents                                                                                                                               | MDV       |                                                                                                                                          | Nationwide   |                                           | 2012 | 2014 | Medical treatment status                  |                                    | Diseases of the musculoskeletal system and connective tissue |                                                                     | rheumatoid arthritis                                                                      |               | age distribution       |
| Mahlich 2016     | Persistence with biologic agents for the treatment of rheumatoid arthritis in Japan                                                                                                                                                                | MDV       |                                                                                                                                          | Nationwide   |                                           | 2012 | 2014 | Patient health service utilization        |                                    | Diseases of the musculoskeletal system and connective tissue |                                                                     | rheumatoid arthritis                                                                      |               | age distribution       |
| Katada 2014      | Prescription patterns and trends in anti-rheumatic drug use based on a large-scale claims database in Japan                                                                                                                                        | JMDC      |                                                                                                                                          | Nationwide   |                                           | 2005 | 2011 | Medical treatment status                  | Quality of care                    | Diseases of the musculoskeletal system and connective tissue |                                                                     | rheumatoid arthritis                                                                      |               |                        |
| Yamanaka 2014    | Estimates of the prevalence of and current treatment practices for rheumatoid arthritis in Japan using reimbursement data from health insurance societies and the IORRA cohort (I)                                                                 | JMDC      |                                                                                                                                          | Nationwide   |                                           | 2005 | 2010 | Clinical epidemiology, course of diseases | Medical treatment status           | Diseases of the musculoskeletal system and connective tissue |                                                                     | rheumatoid arthritis                                                                      | Others        | aged ≥16 to <75 years  |

|                                                           |                                                                                                                                                                                                                |           |                                                                                |                                                |      |      |                                           |                                           |                                                              |                                                                                                     |                                                                     |               |                             |
|-----------------------------------------------------------|----------------------------------------------------------------------------------------------------------------------------------------------------------------------------------------------------------------|-----------|--------------------------------------------------------------------------------|------------------------------------------------|------|------|-------------------------------------------|-------------------------------------------|--------------------------------------------------------------|-----------------------------------------------------------------------------------------------------|---------------------------------------------------------------------|---------------|-----------------------------|
| Sakai 2016                                                | High prevalence of cardiovascular comorbidities in patients with rheumatoid arthritis from a population-based cross-sectional study of a Japanese health insurance database                                    | JMDC      |                                                                                | Nationwide                                     | 2010 | 2012 | Clinical epidemiology, course of diseases |                                           | Diseases of the musculoskeletal system and connective tissue | Diseases of the circulatory system                                                                  | rheumatoid arthritis (RA) and cardiovascular comorbidities          |               | age group                   |
| Tanaka 2016                                               | Risk for cardiovascular disease in Japanese patients with rheumatoid arthritis: a large-scale epidemiological study using a healthcare database                                                                | MDV       |                                                                                | Nationwide                                     | 2011 | 2014 | Clinical epidemiology, course of diseases |                                           | Diseases of the musculoskeletal system and connective tissue | Diseases of the circulatory system                                                                  | rheumatoid arthritis, risk for cardiovascular disease               | Others        | aged 18 years or older      |
| Taniguchi 2018                                            | In-hospital mortality and morbidity of pediatric scoliosis surgery in Japan: Analysis using a national inpatient database                                                                                      | DPC       |                                                                                | Nationwide                                     | 2010 | 2013 | Clinical epidemiology, course of diseases | Intervention effect                       | Diseases of the musculoskeletal system and connective tissue |                                                                                                     | pediatric scoliosis                                                 | Children      | less than 19 years          |
| Oichi 2018                                                | In-hospital complication rate following microendoscopic versus open lumbar laminectomy: a propensity score-matched analysis                                                                                    | DPC       |                                                                                | Nationwide                                     | 2010 | 2013 | Intervention effect                       |                                           | Diseases of the musculoskeletal system and connective tissue |                                                                                                     | Lumbar spinal stenosis                                              | Others        | patients aged $\geq 20$ y   |
| Kato 2016                                                 | Risk of infectious complications associated with blood transfusion in elective spinal surgery-a propensity score matched analysis                                                                              | DPC       |                                                                                | Nationwide                                     | 2007 | 2012 | Intervention effect                       |                                           | Diseases of the musculoskeletal system and connective tissue |                                                                                                     | spinal stenosis, spondylolisis- thesis                              | Others        | aged $\geq 20$ years        |
| Kuboyama 2016                                             | The Number of Patients and Therapeutic Profile of Spinal Stenosis Using Health Insurance Claims in Japan                                                                                                       | NHI/LSEHS | National Health Insurance (NHI) and Late-stage Elderly Health Insurance (LEHI) | Prefecture a prefecture in south-western Japan | 2010 | 2011 | Clinical epidemiology, course of diseases | Medical treatment status                  | Diseases of the musculoskeletal system and connective tissue |                                                                                                     | spinal stenosis                                                     |               |                             |
| Oichi 2019                                                | [Can elective spine surgery be performed safely among nonagenarians?: Analysis of a national inpatient database in Japan]                                                                                      | DPC       |                                                                                | Nationwide                                     | 2010 | 2013 | Intervention effect                       |                                           | Diseases of the musculoskeletal system and connective tissue |                                                                                                     | spine surgery                                                       | Older persons | aged 65 years or older      |
| Oichi 2019                                                | Can Elective Spine Surgery Be Performed Safely Among Nonagenarians?: Analysis of a National Inpatient Database in Japan                                                                                        | DPC       |                                                                                | Nationwide                                     | 2010 | 2013 | Clinical epidemiology, course of diseases | Intervention effect                       | Diseases of the musculoskeletal system and connective tissue |                                                                                                     | surgical outcomes, underwent elective spine surgery                 | Older persons | $\geq 65$ years of age      |
| Ohya 2015                                                 | Perioperative stroke in patients undergoing elective spinal surgery: a retrospective analysis using the Japanese diagnosis procedure combination database                                                      | DPC       |                                                                                | Nationwide                                     | 2007 | 2012 | Intervention effect                       |                                           | Diseases of the musculoskeletal system and connective tissue | Diseases of the circulatory system                                                                  | perioperative stroke in patients undergoing elective spinal surgery | Others        | aged 20 years or older      |
| Masuda 2012                                               | Factors affecting the occurrence of pulmonary embolism after spinal surgery: data from the national administrative database in Japan                                                                           | DPC       |                                                                                | Nationwide                                     | 2007 | 2008 | Clinical epidemiology, course of diseases | Intervention effect                       | Diseases of the musculoskeletal system and connective tissue | Diseases of the circulatory system                                                                  | pulmonary embolism after spinal surgery                             |               |                             |
| Chikuda 2012                                              | Mortality and morbidity in dialysis-dependent patients undergoing spinal surgery: analysis of a national administrative database in Japan                                                                      | DPC       |                                                                                | Nationwide                                     | 2007 | 2008 | Clinical epidemiology, course of diseases | Intervention effect                       | Diseases of the musculoskeletal system and connective tissue | Diseases of the genitourinary system                                                                | dialysis-dependent patients treated with spinal surgery             |               |                             |
| Tomita 2021                                               | Treatment patterns and health care resource utilization among Japanese patients with ankylosing spondylitis: A hospital claims database analysis                                                               | MDV       |                                                                                | Nationwide                                     | 2009 | 2017 | Medical treatment status                  | Health economics                          | Diseases of the musculoskeletal system and connective tissue |                                                                                                     | ankylosing spondylitis (ICD10 codes: M08.1, M45.0, M45.4, M45.9)    |               |                             |
| Miyazaki 2020                                             | Treatment patterns and medical cost of systemic lupus erythematosus patients in Japan: a retrospective claims database study                                                                                   | JMDC      |                                                                                | Nationwide                                     | 2010 | 2017 | Medical treatment status                  | Health economics                          | Diseases of the musculoskeletal system and connective tissue |                                                                                                     | systemic lupus erythematosus (M321)                                 | Others        | aged $\geq 18$ years        |
| Tanaka 2018                                               | Disease severity and economic burden in Japanese patients with systemic lupus erythematosus: A retrospective, observational study                                                                              | JMDC      |                                                                                | Nationwide                                     | 2010 | 2012 | Health economics                          |                                           | Diseases of the musculoskeletal system and connective tissue |                                                                                                     | systemic lupus erythematosus (M32)                                  | Others        | 15 to 65 years of age       |
| Sakai 2020                                                | The risk of hospitalized infection in patients with systemic lupus erythematosus treated with hydroxychloroquine                                                                                               | MDV       |                                                                                | Nationwide                                     | 2015 | 2017 | Intervention effect                       |                                           | Diseases of the musculoskeletal system and connective tissue |                                                                                                     | systemic lupus erythematosus (M321 or M329)                         | Others        | $\geq 16$ years of age      |
| Akiyama 2013                                              | Incidence and risk factors for mortality of vertebral osteomyelitis: a retrospective analysis using the Japanese diagnosis procedure combination database                                                      | DPC       |                                                                                | Nationwide                                     | 2007 | 2010 | Clinical epidemiology, course of diseases |                                           | Diseases of the musculoskeletal system and connective tissue |                                                                                                     | vertebral osteomyelitis                                             |               |                             |
| <b>14) Diseases of the genitourinary system (N00-N99)</b> |                                                                                                                                                                                                                |           |                                                                                |                                                |      |      |                                           |                                           |                                                              |                                                                                                     |                                                                     |               |                             |
| Ikuta 2021                                                | Association of proton pump inhibitors and concomitant drugs with risk of acute kidney injury: a nested case-control study                                                                                      | JMDC      |                                                                                | Nationwide                                     | 2005 | 2017 | Intervention effect                       |                                           | Diseases of the genitourinary system                         |                                                                                                     | Acute kidney injury (AKI; N17X)                                     |               |                             |
| Iwagami 2015                                              | Current state of continuous renal replacement therapy for acute kidney injury in Japanese intensive care units in 2011: analysis of a national administrative database                                         | DPC       |                                                                                | Nationwide                                     | 2011 | 2011 | Medical treatment status                  | Clinical epidemiology, course of diseases | Diseases of the genitourinary system                         |                                                                                                     | acute kidney injury in ICU                                          | Others        | aged $\geq 12$ years        |
| Miyamoto 2019                                             | Association between intravenous contrast media exposure and non-recovery from dialysis-requiring septic acute kidney injury: a nationwide observational study                                                  | DPC       |                                                                                | Nationwide                                     | 2011 | 2016 | Intervention effect                       |                                           | Diseases of the genitourinary system                         |                                                                                                     | septic acute kidney injury                                          | Others        | aged $\geq 18$ years        |
| Takazono 2020                                             | Factor analysis of acute kidney injury in patients administered liposomal amphotericin B in a real-world clinical setting in Japan                                                                             | MDV       |                                                                                | Nationwide                                     | 2008 | 2018 | Intervention effect                       |                                           | Diseases of the genitourinary system                         | Others                                                                                              | broad-spectrum antifungal drug, acute kidney injury                 | Others        | $\geq 18$ year of age       |
| Iwagami 2015                                              | [Comparison of characteristics and prognosis between septic and non-septic acute kidney injury in Japanese intensive care units]                                                                               | DPC       |                                                                                | Nationwide                                     | 2011 | 2011 | Clinical epidemiology, course of diseases |                                           | Diseases of the genitourinary system                         | Certain infectious and parasitic diseases                                                           | septic and non-septic acute kidney injury                           |               |                             |
| Imai 2020                                                 | A cross-sectional exploratory survey on occurrence of triple-whammy prescription pattern in Japan                                                                                                              | JMDC      |                                                                                | Nationwide                                     | 2017 | 2017 | Medical treatment status                  |                                           | Diseases of the genitourinary system                         |                                                                                                     | chronic kidney disease                                              |               |                             |
| Nagai 2019                                                | Higher medical costs for CKD patients with a rapid decline in eGFR: A cohort study from the Japanese general population                                                                                        | NHI/LSEHS | KDB                                                                            | Nationwide                                     | 2012 | 2013 | Health economics                          |                                           | Diseases of the genitourinary system                         |                                                                                                     | chronic kidney disease                                              | Others        | aged 40-74 years            |
| Takada 2021                                               | Stages of a transtheoretical model as predictors for the decline of estimated glomerular filtration rate: a retrospective cohort study                                                                         | JHIA      | Japan Health Insurance Association in Kyoto prefecture                         | Prefecture Kyoto                               | 2012 | 2016 | Clinical epidemiology, course of diseases |                                           | Diseases of the genitourinary system                         |                                                                                                     | kidney disease (estimated glomerular filtration rate)               | Others        | between 35 and 75 years old |
| Fukuma 2020                                               | Quality of Care in Chronic Kidney Disease and Incidence of End-stage Renal Disease in Older Patients: A Cohort Study                                                                                           | NDB       |                                                                                | Nationwide                                     | 2010 | 2014 | Quality of care                           | Intervention effect                       | Diseases of the genitourinary system                         |                                                                                                     | chronic kidney disease, end-stage renal disease                     | Older persons | $\geq 65$ years of age      |
| Kikuchi 2018                                              | Short-term prognosis of emergently hospitalized dialysis-independent chronic kidney disease patients: A nationwide retrospective cohort study in Japan                                                         | DPC       |                                                                                | Nationwide                                     | 2013 | 2016 | Clinical epidemiology, course of diseases |                                           | Diseases of the genitourinary system                         |                                                                                                     | chronic kidney disease                                              | Others        | 20-69 years old             |
| Hagihara 2017                                             | The Survey of the Compliance Situation to the Antihypertensive Therapy Guideline by Analyzing Japanese National Claims Data                                                                                    | NDB       | Sampling data                                                                  | Nationwide                                     | 2011 | 2011 | Medical treatment status                  | Quality of care                           | Diseases of the genitourinary system                         |                                                                                                     | kidney disease                                                      |               |                             |
| Imai 2020                                                 | Nonsteroidal anti-inflammatory drugs use in patients with chronic kidney disease are often prescribed from different clinicians than those who diagnosed them                                                  | JMDC      |                                                                                | Nationwide                                     | 2014 | 2017 | Medical treatment status                  |                                           | Diseases of the genitourinary system                         |                                                                                                     | chronic kidney disease, NSAIDs                                      | Others        | aged $\geq 20$ years        |
| Takada 2019                                               | Previously-initiated hemodialysis as prognostic factor for in-hospital mortality in pneumonia patients with stage 5 chronic kidney disease: Retrospective database study of Japanese hospitals                 | DPC       |                                                                                | Nationwide                                     | 2012 | 2016 | Clinical epidemiology, course of diseases |                                           | Diseases of the genitourinary system                         |                                                                                                     | chronic kidney disease                                              | Others        | aged $\geq 18$ years        |
| Takada 2020                                               | Developing and validating a multivariable prediction model for in-hospital mortality of pneumonia with advanced chronic kidney disease patients: a retrospective analysis using a nationwide database in Japan | DPC       |                                                                                | Nationwide                                     | 2012 | 2016 | Prediction model                          | Clinical epidemiology, course of diseases | Diseases of the genitourinary system                         |                                                                                                     | chronic kidney disease                                              | Others        | aged from 18 to 94 years    |
| Kimura 2020                                               | Diagnosis Patterns of CKD and Anemia in the Japanese Population                                                                                                                                                | Others    | JMDC, MDV                                                                      | Nationwide                                     | 2008 | 2017 | Medical treatment status                  | Quality of care                           | Diseases of the genitourinary system                         | Diseases of the blood and blood-forming organs and certain disorders involving the immune mechanism | anemia, chronic kidney disease                                      | Others        | aged $\geq 18$ years        |
| Tohkin 2016                                               | [Appropriate prescription pattern of medications at the special population]                                                                                                                                    | NDB       | Sampling data                                                                  | Nationwide                                     | 2011 | 2011 | Medical treatment status                  | Quality of care                           | Diseases of the genitourinary system                         | Diseases of the circulatory system                                                                  | chronic kidney disease, cardiovascular disease                      |               |                             |
| Mandai 2020                                               | Nationwide in-hospital mortality following major fractures among hemodialysis patients and the general population: An observational cohort study                                                               | DPC       |                                                                                | Nationwide                                     | 2012 | 2014 | Clinical epidemiology, course of diseases |                                           | Diseases of the genitourinary system                         | Injury, poisoning and certain other consequences of external causes                                 | End-stage kidney disease, major fracture                            | Others        | aged $\geq 18$ years        |

|                 |                                                                                                                                                                                                   |           |                                                                                  |            |              |      |                                           |                                           |                                      |                                                              |                                                                                      |               |                                      |
|-----------------|---------------------------------------------------------------------------------------------------------------------------------------------------------------------------------------------------|-----------|----------------------------------------------------------------------------------|------------|--------------|------|-------------------------------------------|-------------------------------------------|--------------------------------------|--------------------------------------------------------------|--------------------------------------------------------------------------------------|---------------|--------------------------------------|
| Kohsaka 2020    | Cardiovascular and Renal Outcomes Associated With Hyperkalemia in Chronic Kidney Disease: A Hospital-Based Cohort Study                                                                           | MDV       |                                                                                  | Nationwide | 2008         | 2018 | Clinical epidemiology, course of diseases |                                           | Diseases of the genitourinary system | Endocrine, nutritional and metabolic diseases                | CKD, hyperkalemia                                                                    | Others        | aged ≥18 years                       |
| Kusama 2021     | Epidemiology of antibiotic treatment for uncomplicated cystitis in adults in Japan                                                                                                                | JMDC      |                                                                                  | Nationwide | 2013         | 2016 | Medical treatment status                  |                                           | Diseases of the genitourinary system |                                                              | acute cystitis                                                                       | Others        | aged ≥15 years                       |
| Sugihara 2012   | Admissions related to interstitial cystitis in Japan: an estimation based on the Japanese diagnosis procedure combination database                                                                | DPC       |                                                                                  | Nationwide | 2007         | 2009 | Clinical epidemiology, course of diseases |                                           | Diseases of the genitourinary system |                                                              | interstitial cystitis (N301)                                                         |               |                                      |
| Onoue 2016      | [Evaluation of regional differences in health care costs for patients undergoing hemodialysis within the Fukuoka Prefecture Wide-Area Association of Latter-Stage Elderly Healthcare]             | NHI/LSEHS | Fukuoka Prefecture Wide-Area Association of Latter-Stage Elderly Healthcare data | Prefecture | Fukuoka      | 2013 | 2014                                      | Health economics                          | Socioeconomic comparison             |                                                              | hemodialysis                                                                         | Older persons | Latter-Stage Elderly Healthcare data |
| Nakamoto 2019   | [Medical expenses reduction effect by peritoneal dialysis promotion in elderly patients]                                                                                                          | MDV       |                                                                                  | Nationwide | 2015         |      | Health economics                          | Health policy evaluation and utilization  |                                      |                                                              | dialysis                                                                             |               |                                      |
| Yokoyama 2018   | [Compliance and persistence of oral calcimimetics in maintenance hemodialysis patients: a pharmacoepidemiological study utilizing electronic health records]                                      | MDV       |                                                                                  | Nationwide | 2009         | 2015 | Patient health service utilization        |                                           | Diseases of the genitourinary system |                                                              | maintenance hemodialysis patients                                                    |               |                                      |
| Saruwatari 2012 | [Regional variations in healthcare services for patients treated by hemodialysis in Fukuoka]                                                                                                      | NHI/LSEHS | National Health Insurance Association of Fukuoka                                 | Prefecture | Fukuoka      | 2009 | 2010                                      | Clinical epidemiology, course of diseases | Socioeconomic comparison             |                                                              | hemodialysis                                                                         |               |                                      |
| Kinoshita 2018  | Hospital-Volume Effects on Perioperative Outcomes in Peritoneal Dialysis Catheter Implantation: Analysis of 2,505 Cases                                                                           | DPC       |                                                                                  | Nationwide | 2007         | 2012 | Intervention effect                       | Health policy evaluation and utilization  |                                      |                                                              | peritoneal dialysis catheter implantation                                            |               |                                      |
| Mandai 2018     | Dialysis Case Volume Associated With In-Hospital Mortality in Maintenance Dialysis Patients                                                                                                       | DPC       |                                                                                  | Nationwide | 2012         | 2014 | Clinical epidemiology, course of diseases | Health policy evaluation and utilization  |                                      |                                                              | dialysis                                                                             | Others        | aged ≥20 years                       |
| Shinkawa 2019   | Mortality and morbidity after pancreatoduodenectomy in patients undergoing hemodialysis: Analysis using a national inpatient database                                                             | DPC       |                                                                                  | Nationwide | 2010         | 2015 | Clinical epidemiology, course of diseases | Intervention effect                       |                                      | Diseases of the digestive system                             | dialysis, pancreatoduodenectomy                                                      | Others        | aged ≥20 years                       |
| Akiyama 2017    | Evaluation of the treatment patterns and economic burden of dysmenorrhea in Japanese women, using a claims database                                                                               | JMDC      |                                                                                  | Nationwide | 2009         | 2014 | Medical treatment status                  | Health economics                          |                                      |                                                              | primary or secondary dysmenorrhea                                                    | Others        | aged 18-49 years                     |
| Akiyama 2018    | Treatment patterns and healthcare resource utilization and costs in heavy menstrual bleeding: a Japanese claims database analysis                                                                 | JMDC      |                                                                                  | Nationwide | 2009         | 2014 | Medical treatment status                  | Health economics                          |                                      |                                                              | heavy menstrual bleeding                                                             | Others        | aged 18-49 years                     |
| Sugihara 2013   | Longer operative time is associated with higher risk of severe complications after percutaneous nephrolithotomy: analysis of 1511 cases from a Japanese nationwide database                       | DPC       |                                                                                  | Nationwide | 2007         | 2010 | Prediction model                          | Intervention effect                       |                                      |                                                              | ercutaneous nephrolithotomy                                                          |               |                                      |
| Sugihara 2012   | In-hospital outcomes and cost assessment between bipolar versus monopolar transurethral resection of the prostate                                                                                 | DPC       |                                                                                  | Nationwide | 2008         | 2009 | Intervention effect                       | Health economics                          |                                      | Others                                                       | hyperplasia of the prostate                                                          |               |                                      |
| Sugihara 2011   | Impact of hospital volume and laser use on postoperative complications and in-hospital mortality in cases of benign prostate hyperplasia                                                          | DPC       |                                                                                  | Nationwide | 2006         | 2008 | Intervention effect                       | Health policy evaluation and utilization  |                                      |                                                              | Benign Prostate Hyperplasia                                                          |               |                                      |
| Takayama 2012   | Pharmacoeconomic evaluation of combination therapy with dutasteride and α1 blocker for treatment of benign prostatic hyperplasia in Japan                                                         | MDV       | CombAT Study data                                                                | Nationwide | 15 hospitals | 2008 | 2009                                      | Health economics                          |                                      |                                                              | benign prostatic hyperplasia                                                         |               |                                      |
| Shinkawa 2020   | Risk factors of venous thromboembolism in patients with nephrotic syndrome: a retrospective cohort study                                                                                          | MDV       |                                                                                  | Nationwide | 2008         | 2017 | Clinical epidemiology, course of diseases |                                           |                                      |                                                              | nephrotic syndrome (N04.x)                                                           | Others        | >18 years of age                     |
| Zaitou 2018     | Impact of a direct-to-consumer information campaign on prescription patterns for overactive bladder                                                                                               | JMDC      |                                                                                  | Nationwide | 2010         | 2014 | Medical treatment status                  | Health policy evaluation and utilization  |                                      |                                                              | overactive bladder                                                                   | Others        | aged 20 years or older               |
| Kato 2017       | Persistence and adherence to overactive bladder medications in Japan: A large nationwide real-world analysis                                                                                      | Others    | JMDC, Medi-Trend (pharmacy claims database provided by Kyowa Kikaku)             | Nationwide | 2012         | 2014 | Patient health service utilization        |                                           |                                      |                                                              | overactive bladder                                                                   | Others        | aged ≤75 years                       |
| Yoshida 2018    | Anticholinergic burden in the Japanese elderly population: Use of antimuscarinic medications for overactive bladder patients                                                                      | Others    | Medi-Trend (Kyowa Kikaku)                                                        | Nationwide | 2016         | 2016 | Medical treatment status                  |                                           |                                      |                                                              | overactive bladder                                                                   | Older persons | aged ≥65 years                       |
| Shigemi 2019    | Laparoscopic Compared With Open Surgery for Severe Pelvic Inflammatory Disease and Tubo-Ovarian Abscess                                                                                           | DPC       |                                                                                  | Nationwide | 2010         | 2016 | Intervention effect                       |                                           |                                      |                                                              | pelvic inflammatory disease(N739 and N980)with or without tubo-ovarian abscess(N709) | Others        | aged 18 years or older               |
| Shigemi 2019    | Therapeutic Impact of Initial Treatment for Chlamydia trachomatis Among Patients With Pelvic Inflammatory Disease: A Retrospective Cohort Study Using a National Inpatient Database in Japan      | DPC       |                                                                                  | Nationwide | 2010         | 2016 | Intervention effect                       |                                           |                                      |                                                              | Pelvic inflammatory disease                                                          | Others        | ≥18 year of age                      |
| Obinata 2018    | Tension-free vaginal mesh surgery versus laparoscopic sacrocolpopexy for pelvic organ prolapse: Analysis of perioperative outcomes using a Japanese national inpatient database                   | DPC       |                                                                                  | Nationwide | 2014         | 2015 | Intervention effect                       |                                           |                                      |                                                              | pelvic organ prolapse (N81.x)                                                        |               |                                      |
| Sugihara 2011   | Incidence and clinical features of priapism in Japan: 46 cases from the Japanese diagnosis procedure combination database 2006-2008                                                               | DPC       |                                                                                  | Nationwide | 2006         | 2008 | Clinical epidemiology, course of diseases |                                           |                                      |                                                              | priapism (N483)                                                                      |               |                                      |
| Shigemi 2020    | Effect of Japanese herbal Kampo medicines on live birth rate in women with recurrent pregnancy loss                                                                                               | JMDC      |                                                                                  | Nationwide | 2005         | 2018 | Intervention effect                       |                                           |                                      | Pregnancy, childbirth and the puerperium                     | recurrent pregnancy loss                                                             | Others        | aged ≥18 years                       |
| Yamamoto 2015   | Relationship between hospital volume and hemorrhagic complication after percutaneous renal biopsy: results from the Japanese diagnosis procedure combination database                             | DPC       |                                                                                  | Nationwide | 2007         | 2010 | Health policy evaluation and utilization  |                                           |                                      |                                                              | percutaneous renal biopsy                                                            | Others        | aged ≥15 years                       |
| Sugihara 2012   | Renal haemorrhage risk after extracorporeal shockwave lithotripsy: results from the Japanese Diagnosis Procedure Combination Database                                                             | DPC       |                                                                                  | Nationwide | 2006         | 2008 | Clinical epidemiology, course of diseases |                                           |                                      |                                                              | renal haemorrhage                                                                    | Others        | excluded under the age of 15 years   |
| Iwagami 2017    | Impact of end-stage renal disease on hospital outcomes among patients admitted to intensive care units: A retrospective matched-pair cohort study                                                 | DPC       |                                                                                  | Nationwide | 2011         | 2011 | Clinical epidemiology, course of diseases |                                           |                                      |                                                              | end-stage renal disease                                                              | Others        | aged ≥20 years                       |
| Katsuno 2021    | Burden of Renal Events Associated with Nonsteroidal Anti-inflammatory Drugs in Patients with Osteoarthritis and Chronic Low Back Pain: A Retrospective Database Study                             | JMDC      |                                                                                  | Nationwide | 2009         | 2018 | Intervention effect                       | Health economics                          |                                      | Diseases of the musculoskeletal system and connective tissue | renal disease, osteoarthritis and chronic low back pain                              | Others        | ≥18 years of age                     |
| Doi 2017        | Associations of Polyethyleneimine-Coated AN69ST Membrane in Continuous Renal Replacement Therapy with the Intensive Care Outcomes: Observations from a Claims Database from Japan                 | MDV       |                                                                                  | Nationwide | 2014         | 2015 | Intervention effect                       |                                           |                                      |                                                              | receiving continuous renal replacement therapy                                       | Others        | age at baseline ≥18 years            |
| Miyamoto 2019   | Temporal change in characteristics and outcomes of acute kidney injury on renal replacement therapy in intensive care units: analysis of a nationwide administrative database in Japan, 2007-2016 | DPC       |                                                                                  | Nationwide | 2007         | 2016 | Clinical epidemiology, course of diseases | Intervention effect                       |                                      |                                                              | acute kidney injury on renal replacement therapy                                     | Others        | aged ≥18 years                       |

|                                                                                    |                                                                                                                                                                                                    |           |                                                                                                         |              |                                |      |                                           |                                          |                                                                      |                                                                      |                                                                                   |               |                     |
|------------------------------------------------------------------------------------|----------------------------------------------------------------------------------------------------------------------------------------------------------------------------------------------------|-----------|---------------------------------------------------------------------------------------------------------|--------------|--------------------------------|------|-------------------------------------------|------------------------------------------|----------------------------------------------------------------------|----------------------------------------------------------------------|-----------------------------------------------------------------------------------|---------------|---------------------|
| Obata 2021                                                                         | The clinical usage of liposomal amphotericin B in patients receiving renal replacement therapy in Japan: a nationwide observational study                                                          | MDV       |                                                                                                         | Nationwide   | 2008                           | 2018 | Medical treatment status                  | Intervention effect                      | Diseases of the genitourinary system                                 | Others                                                               | broad-spectrum antifungal drug (renal replacement therapy)                        | Others        | ≥18 year of age     |
| Sugihara 2013                                                                      | A nomogram predicting severe adverse events after ureteroscopic lithotripsy: 12 372 patients in a Japanese national series                                                                         | DPC       |                                                                                                         | Nationwide   | 2007                           | 2010 | Prediction model                          | Intervention effect                      | Diseases of the genitourinary system                                 |                                                                      | ureteroscopic lithotripsy                                                         |               |                     |
| Adomi 2019                                                                         | Factors associated with long-term urinary catheterisation and its impact on urinary tract infection among older people in the community: a population-based observational study in a city in Japan | NHI/LSEHS | Medical and long-term care insurance claims data                                                        | Municipality | Kashiwa City, Chiba Prefecture | 2012 | 2013                                      | Intervention effect                      | Medical treatment status                                             | Diseases of the genitourinary system                                 | urinary tract infection                                                           | Older persons | ≥75 years of age    |
| Imatoh 2018                                                                        | Association between dipeptidyl peptidase-4 inhibitors and urinary tract infection in elderly patients: A retrospective cohort study                                                                | NHI/LSEHS | Wide - Area Association of Latter - Stage Elderly Healthcare                                            | Prefecture   | Fukuoka prefecture             | 2010 | 2016                                      | Intervention effect                      |                                                                      | Diseases of the genitourinary system                                 | urinary tract infections (UTI)                                                    | Older persons | aged 75 and over    |
| Muramatsu 2018                                                                     | Efficacy of Antimicrobial Catheters for Prevention of Catheter-Associated Urinary Tract Infection in Acute Cerebral Infarction                                                                     | DPC       |                                                                                                         | Nationwide   | 2012                           | 2014 | Intervention effect                       |                                          | Diseases of the genitourinary system                                 | Diseases of the circulatory system                                   | Catheter-associated urinary tract infection, cerebral infarction                  |               |                     |
| Isotani 2019                                                                       | Endurological treatment trend of upper urinary urolithiasis in Japan from the Japanese Diagnosis Procedure Combination Database                                                                    | DPC       |                                                                                                         | Nationwide   | 2008                           | 2012 | Medical treatment status                  |                                          | Diseases of the genitourinary system                                 |                                                                      | upper urinary urolithiasis                                                        |               |                     |
| 15) Pregnancy, childbirth and the puerperium (Q00-Q99)                             |                                                                                                                                                                                                    |           |                                                                                                         |              |                                |      |                                           |                                          |                                                                      |                                                                      |                                                                                   |               |                     |
| Shigem 2019                                                                        | Safety of Laparoscopic Surgery for Benign Diseases during Pregnancy: A Nationwide Retrospective Cohort Study                                                                                       | DPC       |                                                                                                         | Nationwide   | 2010                           | 2016 | Intervention effect                       |                                          | Pregnancy, childbirth and the puerperium                             |                                                                      | abdominal surgery during pregnancy                                                | Others        | aged 13 to 53 years |
| Maeda 2021                                                                         | Cesarean delivery rates for overall and multiple pregnancies in Japan: A descriptive study using nationwide health insurance claims data                                                           | NDB       |                                                                                                         | Nationwide   | 2014                           | 2014 | Medical treatment status                  | Socioeconomic comparison                 | Pregnancy, childbirth and the puerperium                             |                                                                      | Cesarean delivery                                                                 |               | age group           |
| Maeda 2018                                                                         | Cesarean section rates and local resources for perinatal care in Japan: A nationwide ecological study using the national database of health insurance claims                                       | NDB       | Aggregated data                                                                                         | Nationwide   | 2013                           | 2013 | Medical treatment status                  | Socioeconomic comparison                 | Pregnancy, childbirth and the puerperium                             |                                                                      | Cesarean section                                                                  |               | age group           |
| Abe 2018                                                                           | Association between mode of anaesthesia and severe maternal morbidity during admission for scheduled Caesarean delivery: a nationwide population-based study in Japan, 2010-2013                   | DPC       |                                                                                                         | Nationwide   | 2010                           | 2013 | Intervention effect                       |                                          | Pregnancy, childbirth and the puerperium                             |                                                                      | severe maternal morbidity, caesarean delivery                                     |               |                     |
| Ishikawa 2018                                                                      | Antihypertensives prescribed for pregnant women in Japan: Prevalence and timing determined from a database of health insurance claims                                                              | JMDC      |                                                                                                         | Nationwide   | 2005                           | 2016 | Medical treatment status                  |                                          | Pregnancy, childbirth and the puerperium                             | Diseases of the circulatory system                                   | antihypertensives prescribed for pregnant women                                   |               |                     |
| Naruse 2021                                                                        | Placental abruption in each hypertensive disorders of pregnancy phenotype: a retrospective cohort study using a national inpatient database in Japan                                               | DPC       |                                                                                                         | Nationwide   | 2010                           | 2018 | Clinical epidemiology, course of diseases |                                          | Pregnancy, childbirth and the puerperium                             | Diseases of the circulatory system                                   | Placental abruption, preeclampsia, hypertension                                   | Others        | aged 16-49 years    |
| Michihata 2019                                                                     | Safety and effectiveness of Japanese herbal Kampo medicines for treatment of hyperemesis gravidarum                                                                                                | JMDC      |                                                                                                         | Nationwide   | 2005                           | 2016 | Intervention effect                       | Health economics                         | Pregnancy, childbirth and the puerperium                             | Others                                                               | pregnant women                                                                    | Others        | aged ≥19 years      |
| Ueda 2020                                                                          | [Responses to obstetric bleeding: Nationwide trend survey of obstetric critical bleeding using a database of information such as health insurance claims and specific health checkups]*            | NDB       |                                                                                                         | Nationwide   | 2010                           | 2018 | Clinical epidemiology, course of diseases | Medical treatment status                 | Pregnancy, childbirth and the puerperium                             |                                                                      | critical obstetrical hemorrhage                                                   |               |                     |
| Sato 2019                                                                          | Nationwide survey of severe postpartum hemorrhage in Japan: an exploratory study using the national database of health insurance claims                                                            | NDB       | Sampling data                                                                                           | Nationwide   | 2011                           | 2014 | Clinical epidemiology, course of diseases | Health policy evaluation and utilization | Pregnancy, childbirth and the puerperium                             |                                                                      | postpartum hemorrhage                                                             |               |                     |
| Isogai 2017                                                                        | In-hospital management and outcomes in patients with peripartum cardiomyopathy: a descriptive study using a national inpatient database in Japan                                                   | DPC       |                                                                                                         | Nationwide   | 2007                           | 2014 | Clinical epidemiology, course of diseases | Medical treatment status                 | Pregnancy, childbirth and the puerperium                             |                                                                      | Peripartum cardiomyopathy                                                         | Others        | aged 16-55 years    |
| Shigem 2021                                                                        | Association between rehabilitation during hospitalization and perinatal outcomes among pregnant women with threatened preterm birth                                                                | DPC       |                                                                                                         | Nationwide   | 2010                           | 2017 | Intervention effect                       |                                          | Pregnancy, childbirth and the puerperium                             | Certain conditions originating in the perinatal period               | threatened preterm birth                                                          | Others        | aged 13-50 years    |
| Hashimoto 2020                                                                     | Ophthalmic Corticosteroids in Pregnant Women with Allergic Conjunctivitis and Adverse Neonatal Outcomes: Propensity Score Analyses                                                                 | JMDC      |                                                                                                         | Nationwide   | 2005                           | 2018 | Intervention effect                       |                                          | Pregnancy, childbirth and the puerperium                             | Certain conditions originating in the perinatal period               | topical ophthalmic corticosteroids during pregnancy and adverse neonatal outcomes |               |                     |
| 16) Certain conditions originating in the perinatal period (P00-P96)               |                                                                                                                                                                                                    |           |                                                                                                         |              |                                |      |                                           |                                          |                                                                      |                                                                      |                                                                                   |               |                     |
| Shigeoka 2014                                                                      | Supplier-induced demand for newborn treatment: evidence from Japan                                                                                                                                 | Others    | collecting data from Japanese insurance claims (introduction of the partial prospective payment system) | Nationwide   | 2004                           | 2008 | Health economics                          | Health policy evaluation and utilization | Certain conditions originating in the perinatal period               |                                                                      | newborn treatment                                                                 | Children      | newborn             |
| Maeda 2021                                                                         | Trends in intensive neonatal care during the COVID-19 outbreak in Japan                                                                                                                            | MDV       |                                                                                                         | Nationwide   | 2019                           | 2020 | Medical treatment status                  | COVID-19                                 | Certain conditions originating in the perinatal period               |                                                                      | intensive neonatal care                                                           | Children      | neonate             |
| Ogawa 2018                                                                         | Maternal exposure to benzodiazepine and risk of preterm birth and low birth weight: A case-control study using a claims database in Japan                                                          | JMDC      |                                                                                                         | Nationwide   | 2005                           | 2014 | Intervention effect                       |                                          | Certain conditions originating in the perinatal period               | Mental, Behavioral and Neurodevelopmental disorders                  | benzodiazepine and risk of preterm birth and low birth weight                     |               |                     |
| 17) Congenital malformations, deformations and chromosomal abnormalities (Q00-Q99) |                                                                                                                                                                                                    |           |                                                                                                         |              |                                |      |                                           |                                          |                                                                      |                                                                      |                                                                                   |               |                     |
| Ono 2015                                                                           | Effect of Hospital Volume on Outcomes of Surgery for Cleft Lip and Palate                                                                                                                          | DPC       |                                                                                                         | Nationwide   | 2010                           | 2013 | Health policy evaluation and utilization  | Health economics                         | Congenital malformations, deformations and chromosomal abnormalities |                                                                      | Cleft lip and cleft palate                                                        | Children      | children            |
| Lin 2020                                                                           | Diagnosis and medical care for congenital cytomegalovirus infection: An observational study using claims data in Japan, 2010 to 2017                                                               | JMDC      |                                                                                                         | Nationwide   | 2010                           | 2017 | Medical treatment status                  | Quality of care                          | Congenital malformations, deformations and chromosomal abnormalities |                                                                      | congenital cytomegalovirus (ICD-10 code P35.1)                                    | Children      | newborn             |
| Ishikawa 2021                                                                      | Validity of congenital malformation diagnoses in healthcare claims from a university hospital in Japan                                                                                             | Others    | inpatient and outpatient claims from a university hospital, medical records (as a gold standard)        | Others       | Tohoku University Hospital     | 2015 | 2015                                      | Research methodology                     |                                                                      | Congenital malformations, deformations and chromosomal abnormalities | Congenital malformations (Q00-Q89)                                                | Children      | infants             |
| Murase 2018                                                                        | Nationwide Increase in Cryptorchidism After the Fukushima Nuclear Accident                                                                                                                         | DPC       |                                                                                                         | Nationwide   | 2010                           | 2015 | Clinical epidemiology, course of diseases | Others                                   | Congenital malformations, deformations and chromosomal abnormalities |                                                                      | cryptorchidism                                                                    | Children      | congenital diseases |
| Kimura 2020                                                                        | Utilization and efficacy of palivizumab for children with Down syndrome                                                                                                                            | JMDC      |                                                                                                         | Nationwide   | 2007                           | 2015 | Intervention effect                       | Medical treatment status                 | Congenital malformations, deformations and chromosomal abnormalities | Certain infectious and parasitic diseases                            | Down syndrome, respiratory syncytial virus                                        | Children      | ≤24 months of age   |
| Nomoto 2018                                                                        | [Epidemiology Study of Risk Factors of Severe Respiratory Syncytial Virus Infectious Diseases in Children with Down Syndrome Using Medical Records]                                                | MDV       |                                                                                                         | Nationwide   | 2011                           | 2015 | Clinical epidemiology, course of diseases |                                          | Congenital malformations, deformations and chromosomal abnormalities | Certain infectious and parasitic diseases                            | Down's syndrome, Respiratory syncytial virus                                      | Children      | aged 0-1 years      |



|                                                                                          |                                                                                                                                                                                                     |           |                                                        |              |                           |      |                                           |                                          |                                                                      |                                                                                                     |                                                           |                                    |                       |
|------------------------------------------------------------------------------------------|-----------------------------------------------------------------------------------------------------------------------------------------------------------------------------------------------------|-----------|--------------------------------------------------------|--------------|---------------------------|------|-------------------------------------------|------------------------------------------|----------------------------------------------------------------------|-----------------------------------------------------------------------------------------------------|-----------------------------------------------------------|------------------------------------|-----------------------|
| Ishimaru 2019                                                                            | Impact of congenital heart disease on outcomes after primary repair of esophageal atresia: a retrospective observational study using a nationwide database in Japan                                 | DPC       |                                                        | Nationwide   | 2010                      | 2016 | Clinical epidemiology, course of diseases |                                          | Congenital malformations, deformations and chromosomal abnormalities | esophageal atresia (ICD code: Q390, 391)                                                            | Children                                                  | neonates (≤ 2 days old)            |                       |
| Fujiogi 2019                                                                             | Factors affecting successful atropine therapy for infantile hypertrophic pyloric stenosis: a retrospective analysis using a nationwide database in Japan                                            | DPC       |                                                        | Nationwide   | 2010                      | 2016 | Prediction model                          | Intervention effect                      | Congenital malformations, deformations and chromosomal abnormalities | infantile hypertrophic pyloric stenosis (Q400)                                                      | Children                                                  | 0-100 days old                     |                       |
| Fujiogi 2020                                                                             | Clinical features, practice patterns and outcomes of omphalocele: a descriptive study using a nationwide inpatient database in Japan                                                                | DPC       |                                                        | Nationwide   | 2010                      | 2016 | Clinical epidemiology, course of diseases | Medical treatment status                 | Congenital malformations, deformations and chromosomal abnormalities | Omphalocele (ICD-10 code: Q792)                                                                     | Children                                                  | babies (≤2 days old)               |                       |
| Michihata 2016                                                                           | Hospital volume and mortality due to preterm patent ductus arteriosus                                                                                                                               | DPC       |                                                        | Nationwide   | 2010                      | 2013 | Health policy evaluation and utilization  |                                          | Congenital malformations, deformations and chromosomal abnormalities | Preterm patent ductus arteriosus (ICD-10 code: Q250)                                                | Children                                                  | excluded: age >1 year at admission |                       |
| Nagano 2017                                                                              | Surgery versus percutaneous transcatheter embolization for pulmonary arteriovenous malformation: Analysis of a national inpatient database in Japan                                                 | DPC       |                                                        | Nationwide   | 2010                      | 2015 | Intervention effect                       |                                          | Congenital malformations, deformations and chromosomal abnormalities | Diseases of the circulatory system                                                                  | pulmonary arteriovenous malformation (ICD-10 code: I28.0) |                                    |                       |
| Fujiogi 2019                                                                             | Early Outcomes of Laparoscopic Versus Open Surgery for Urachal Remnant Resection in Children: A Retrospective Analysis Using a Nationwide Inpatient Database in Japan                               | DPC       |                                                        | Nationwide   | 2015                      | 2017 | Intervention effect                       |                                          | Congenital malformations, deformations and chromosomal abnormalities | Injury, poisoning and certain other consequences of external causes                                 | urachal remnant, postoperative complications              | Children                           | age: 0-18 years       |
| <b>18) Injury, poisoning and certain other consequences of external causes (S00-T98)</b> |                                                                                                                                                                                                     |           |                                                        |              |                           |      |                                           |                                          |                                                                      |                                                                                                     |                                                           |                                    |                       |
| Kondo 2019                                                                               | Characteristics, treatments, and outcomes among patients with abdominal aortic injury in Japan: a nationwide cohort study                                                                           | DPC       |                                                        | Nationwide   | 2010                      | 2017 | Clinical epidemiology, course of diseases | Medical treatment status                 | Injury, poisoning and certain other consequences of external causes  | Abdominal aortic injury (ICD-10 code: S350)                                                         | Others                                                    | age ≥18 years                      |                       |
| Otake 2021                                                                               | Association between parenteral nutrition in the early phase and outcomes in patients with abdominal trauma undergoing emergency laparotomy: A retrospective nationwide study                        | DPC       |                                                        | Nationwide   | 2010                      | 2018 | Intervention effect                       |                                          | Injury, poisoning and certain other consequences of external causes  | abdominal trauma undergoing emergency laparotomy                                                    | Others                                                    | age of >18 years                   |                       |
| Ohbe 2019                                                                                | Extracorporeal membrane oxygenation improves outcomes of accidental hypothermia without vital signs: A nationwide observational study                                                               | DPC       |                                                        | Nationwide   | 2010                      | 2017 | Intervention effect                       |                                          | Injury, poisoning and certain other consequences of external causes  | accidental hypothermia                                                                              | Others                                                    | aged ≥19 years                     |                       |
| Muramatsu 2020                                                                           | Epidemiological Study of Hospital Admissions for Food-induced Anaphylaxis using the Japanese Diagnosis Procedure Combination Database                                                               | DPC       |                                                        | Nationwide   | 2014                      | 2017 | Clinical epidemiology, course of diseases |                                          | Injury, poisoning and certain other consequences of external causes  | anaphylactic shock due to an adverse food reaction (ICD-10 code T78.0)                              |                                                           | age group                          |                       |
| Nakajima 2020                                                                            | Epinephrine autoinjector prescription patterns for severe anaphylactic patients in Japan: A retrospective analysis of health insurance claims data                                                  | JMDC      |                                                        | Nationwide   | 2011                      | 2016 | Medical treatment status                  | Quality of care                          | Injury, poisoning and certain other consequences of external causes  | anaphylaxis                                                                                         |                                                           |                                    |                       |
| Okubo 2021                                                                               | Effects of Glucocorticoids on Hospitalized Children With Anaphylaxis                                                                                                                                | DPC       |                                                        | Nationwide   | 2010                      | 2015 | Intervention effect                       | Medical treatment status                 | Injury, poisoning and certain other consequences of external causes  | Diseases of the skin and subcutaneous tissue                                                        | anaphylaxis                                               | Children                           | younger than 18 years |
| Yasunaga 2010                                                                            | Short report: Clinical features of bowel anisakiasis in Japan                                                                                                                                       | DPC       |                                                        | Nationwide   | 2007                      | 2008 | Clinical epidemiology, course of diseases |                                          | Injury, poisoning and certain other consequences of external causes  | anisakiasis (ICD code, T810)                                                                        |                                                           |                                    |                       |
| Tsuchiya 2018                                                                            | Tracheostomy and mortality in patients with severe burns: A nationwide observational study                                                                                                          | DPC       |                                                        | Nationwide   | 2010                      | 2014 | Intervention effect                       |                                          | Injury, poisoning and certain other consequences of external causes  | severe burns                                                                                        | Others                                                    | aged ≥18 years                     |                       |
| Tagami 2017                                                                              | Antithrombin use and 28-day in-hospital mortality among severe-burn patients: an observational nationwide study                                                                                     | DPC       |                                                        | Nationwide   | 2010                      | 2013 | Intervention effect                       |                                          | Injury, poisoning and certain other consequences of external causes  | severe burns                                                                                        |                                                           |                                    |                       |
| Tagami 2015                                                                              | Validation of the prognostic burn index: a nationwide retrospective study                                                                                                                           | DPC       | (relationships between PBI and mortality)              | Nationwide   | 2010                      | 2013 | Research methodology                      |                                          | Injury, poisoning and certain other consequences of external causes  | burn patients                                                                                       |                                                           |                                    |                       |
| Endo 2019                                                                                | Volume-outcome relationship on survival and cost benefits in severe burn injury: a retrospective analysis of a Japanese nationwide administrative database                                          | DPC       |                                                        | Nationwide   | 2010                      | 2015 | Health economics                          | Health policy evaluation and utilization | Injury, poisoning and certain other consequences of external causes  | burn injury                                                                                         |                                                           |                                    |                       |
| Matsuo 2020                                                                              | Age-dependent influence of premorbid underweight status on mortality in severe burn patients: An administrative database study                                                                      | DPC       |                                                        | Nationwide   | 2014                      | 2018 | Clinical epidemiology, course of diseases |                                          | Injury, poisoning and certain other consequences of external causes  | burn injuries                                                                                       | Others                                                    | 18-84 years                        |                       |
| Tagami 2016                                                                              | Prophylactic Antibiotics May Improve Outcome in Patients With Severe Burns Requiring Mechanical Ventilation: Propensity Score Analysis of a Japanese Nationwide Database                            | DPC       |                                                        | Nationwide   | 2010                      | 2013 | Intervention effect                       |                                          | Injury, poisoning and certain other consequences of external causes  | severe burn                                                                                         |                                                           |                                    |                       |
| Nakajima 2019                                                                            | Effect of high-dose vitamin C therapy on severe burn patients: a nationwide cohort study                                                                                                            | DPC       |                                                        | Nationwide   | 2010                      | 2016 | Intervention effect                       |                                          | Injury, poisoning and certain other consequences of external causes  | burn (ICD-10 codes: T20–T32)                                                                        | Others                                                    | aged ≥15 years                     |                       |
| Tagami 2019                                                                              | Haptoglobin use and acute kidney injury requiring renal replacement therapy among patients with severe burn injury: a nationwide database study                                                     | DPC       |                                                        | Nationwide   | 2010                      | 2013 | Intervention effect                       |                                          | Injury, poisoning and certain other consequences of external causes  | burn                                                                                                |                                                           |                                    |                       |
| Nakajima 2020                                                                            | Hyperbaric oxygen therapy and mortality from carbon monoxide poisoning: A nationwide observational study                                                                                            | DPC       |                                                        | Nationwide   | 2010                      | 2017 | Intervention effect                       |                                          | Injury, poisoning and certain other consequences of external causes  | carbon monoxide poisoning (ICD-10 code: T58)                                                        | Others                                                    | adult patients                     |                       |
| Nakajima 2019                                                                            | Disaster-related carbon monoxide poisoning after the Great East Japan Earthquake, 2011: a nationwide observational study                                                                            | DPC       |                                                        | Nationwide   | 2010                      | 2017 | Clinical epidemiology, course of diseases | Others                                   | Injury, poisoning and certain other consequences of external causes  | CO poisoning                                                                                        |                                                           |                                    |                       |
| Chikuda 2014                                                                             | Mortality and morbidity after high-dose methylprednisolone treatment in patients with acute cervical spinal cord injury: a propensity-matched analysis using a nationwide administrative database   | DPC       |                                                        | Nationwide   | 2007                      | 2009 | Intervention effect                       |                                          | Injury, poisoning and certain other consequences of external causes  | cervical spinal cord injury (SCI) (ICD-10 code: S141)                                               |                                                           |                                    |                       |
| Ohbe 2018                                                                                | Cholinergic Crisis Caused by Cholinesterase Inhibitors: a Retrospective Nationwide Database Study                                                                                                   | DPC       |                                                        | Nationwide   | 2010                      | 2016 | Intervention effect                       |                                          | Injury, poisoning and certain other consequences of external causes  | cholinergic crisis (T44.0)                                                                          |                                                           | age categories                     |                       |
| Toi 2018                                                                                 | Present epidemiology of chronic subdural hematoma in Japan: analysis of 63,358 cases recorded in a national administrative database                                                                 | DPC       |                                                        | Nationwide   | 2010                      | 2013 | Clinical epidemiology, course of diseases |                                          | Injury, poisoning and certain other consequences of external causes  | chronic subdural hematoma (S0650)                                                                   |                                                           | no restriction on patient age      |                       |
| Okumura 2017                                                                             | Epidemiology of overdose episodes from the period prior to hospitalization for drug poisoning until discharge in Japan: An exploratory descriptive study using a nationwide claims database         | NDB       |                                                        | Nationwide   | 2012                      | 2013 | Clinical epidemiology, course of diseases | Medical treatment status                 | Injury, poisoning and certain other consequences of external causes  | overdose episodes (defined as an initial definitive diagnosis of drug poisoning (ICD10: T360-T509)) |                                                           |                                    |                       |
| Kanehara 2016                                                                            | [Psychiatric intervention and repeated admission to emergency centers due to drug overdose]                                                                                                         | DPC       | DPC Study Group                                        | Nationwide   | 2010                      | 2013 | Intervention effect                       |                                          | Injury, poisoning and certain other consequences of external causes  | Mental, Behavioral and Neurodevelopmental disorders                                                 | psychiatric intervention, drug overdose                   | Others                             | aged ≥12 years        |
| Okumura 2012                                                                             | Characteristics, procedural differences, and costs of inpatients with drug poisoning in acute care hospitals in Japan                                                                               | DPC       |                                                        | Nationwide   | 2008                      | 2008 | Medical treatment status                  | Health economics                         | Injury, poisoning and certain other consequences of external causes  | drug poisoning                                                                                      | Others                                                    | aged 12 or above                   |                       |
| Matsuda 2016                                                                             | [An analysis of the utilization of medical care services for femoral neck fracture patients using the comprehensive medical care database]*                                                         | NHI/LSEHS | medical insurance claims and LTC insurance claims data | Municipality | A municipality in Fukuoka | 2010 | 2013                                      | Health economics                         | Health policy evaluation and utilization                             | Injury, poisoning and certain other consequences of external causes                                 | femoral neck fracture                                     |                                    |                       |
| Tsuda 2014                                                                               | Effects of fondaparinux on pulmonary embolism following hemiarthroplasty for femoral neck fracture: a retrospective observational study using the Japanese Diagnosis Procedure Combination database | DPC       |                                                        | Nationwide   | 2007                      | 2010 | Intervention effect                       |                                          | Injury, poisoning and certain other consequences of external causes  | femoral neck fracture (S72.0)                                                                       |                                                           |                                    |                       |
| Hara 2020                                                                                | [Assessment of early surgery for hip fracture from the diagnosis procedure combination database]                                                                                                    | MDV       |                                                        | Nationwide   | 2017                      | 2017 | Intervention effect                       | Health economics                         | Injury, poisoning and certain other consequences of external causes  | fracture of the femur                                                                               | Older persons                                             | aged ≥65 years                     |                       |

|               |                                                                                                                                                                                                                                  |           |                                                                                    |              |                                 |      |      |                                           |                                           |                                                                     |                                                                                     |               |                                    |
|---------------|----------------------------------------------------------------------------------------------------------------------------------------------------------------------------------------------------------------------------------|-----------|------------------------------------------------------------------------------------|--------------|---------------------------------|------|------|-------------------------------------------|-------------------------------------------|---------------------------------------------------------------------|-------------------------------------------------------------------------------------|---------------|------------------------------------|
| Nishioka 2020 | Body mass index and recovery of activities of daily living in older patients with femoral fracture: An analysis of a national inpatient database in Japan                                                                        | JMDC      | Japan Medical Data Center (JMDC) Diagnosis Procedure Combination (DPC) database    | Nationwide   |                                 | 2014 | 2017 | Clinical epidemiology, course of diseases |                                           | Injury, poisoning and certain other consequences of external causes | acute femoral fracture                                                              | Older persons | aged ≥65 years                     |
| Tanaka 2016   | Validation Study of Claims-based Definitions of Suspected Atypical Femoral Fractures Using Clinical Information                                                                                                                  | Others    | claims databases, electronic medical record databases                              | Others       | three hospitals                 | 2010 | 2012 | Research methodology                      |                                           | Injury, poisoning and certain other consequences of external causes | atypical femoral fractures                                                          |               |                                    |
| Tanaka 2012   | [An investigation of factors affecting in-hospital mortality of proximal femoral fracture using the DPC database]*                                                                                                               | DPC       | DPC Study Group                                                                    | Nationwide   |                                 | 2007 | 2009 | Clinical epidemiology, course of diseases |                                           | Injury, poisoning and certain other consequences of external causes | fracture of the neck of the femur, petrocharteric fractur (S72.0 S72.1)             | Older persons | excluded <60 years old             |
| Hayashi 2019  | Data regarding fracture incidence according to fracture site, month, and age group obtained from the large public health insurance claim database in Japan                                                                       | NDB       |                                                                                    | Others       | Kanto area                      | 2013 | 2016 | Clinical epidemiology, course of diseases | Research methodology                      | Injury, poisoning and certain other consequences of external causes | fracture                                                                            |               |                                    |
| Hayashi 2019  | Variation in fracture risk by season and weather: A comprehensive analysis across age and fracture site using a National Database of Health Insurance Claims in Japan                                                            | NDB       |                                                                                    | Others       | Kanto area                      | 2013 | 2016 | Clinical epidemiology, course of diseases |                                           | Injury, poisoning and certain other consequences of external causes | fracture                                                                            |               |                                    |
| Iihara 2016   | Polypharmacy of medications and fall-related fractures in older people in Japan: a comparison between driving-prohibited and driving-cautioned medications                                                                       | NDB       | Sampling data                                                                      | Nationwide   |                                 | 2011 | 2012 | Clinical epidemiology, course of diseases | Medical treatment status                  | Injury, poisoning and certain other consequences of external causes | fall-related fractures                                                              | Older persons | aged ≥65 years                     |
| Miyake 2015   | Characteristics of heat-illness patients in Japan : Analysis from receipt data for the past                                                                                                                                      | NDB       |                                                                                    | Nationwide   |                                 | 2010 | 2014 | Clinical epidemiology, course of diseases |                                           | Injury, poisoning and certain other consequences of external causes | heatstroke                                                                          |               |                                    |
| Jamal 2020    | Multilevel analysis of hemodialysis-associated infection among end-stage renal disease patients: results of a retrospective cohort study utilizing the insurance claim data of Fukuoka Prefecture, Japan                         | NHI/LSEHS | Fukuoka Prefecture Association of Latter Stage Elderly Healthcare                  | Prefecture   | Fukuoka                         | 2015 | 2017 | Clinical epidemiology, course of diseases | Socioeconomic comparison                  | Injury, poisoning and certain other consequences of external causes | hemodialysis-associated infection                                                   | Older persons | ≥65 years of age                   |
| Yamazaki 2020 | [The effect of rehabilitation to the patient with osteosynthesis of the proximal femoral fractures]                                                                                                                              | DPC       |                                                                                    | Nationwide   |                                 | 2013 | 2014 | Intervention effect                       |                                           | Injury, poisoning and certain other consequences of external causes | hip fracture                                                                        | Others        | aged ≥15 years                     |
| Maki 2019     | Impact of Number of Drug Types on Clinical Outcome in Patients with Acute Hip Fracture                                                                                                                                           | JMDC      |                                                                                    | Nationwide   |                                 | 2014 | 2017 | Intervention effect                       |                                           | Injury, poisoning and certain other consequences of external causes | acute hip fracture (ICD-10 code: S70)                                               | Older persons | aged ≥65 years                     |
| Fukuda 2019   | [Surgery for hip fracture within 36 hours of injury requires additional emergency care management Analysis of 2017 DPC data]*                                                                                                    | MDV       |                                                                                    | Nationwide   |                                 | 2017 | 2017 | Health economics                          |                                           | Injury, poisoning and certain other consequences of external causes | Hip fracture                                                                        | Others        | aged <65 years                     |
| Mori 2018     | Estimated expenditures for hip fractures using merged healthcare insurance data for individuals aged ≥= 75 years and long-term care insurance claims data in Japan                                                               | NHI/LSEHS | healthcare insurance and long-term care insurance claims data                      | Municipality | City of Kashiwa                 | 2012 | 2013 | Health economics                          |                                           | Injury, poisoning and certain other consequences of external causes | hip fracture                                                                        | Older persons | aged ≥75 years                     |
| Tomioka 2018  | Equality of treatment for hip fracture irrespective of regional differences in socioeconomic status: Analysis of nationwide hospital claims data in Japan                                                                        | DPC       |                                                                                    | Nationwide   |                                 | 2011 | 2014 | Medical treatment status                  | Socioeconomic comparison                  | Injury, poisoning and certain other consequences of external causes | hip fracture                                                                        | Others        | aged ≥40 years                     |
| Matsuda 2020  | [Big data analysis of medical and nursing care: An analysis of the usage of medical and nursing care services of elderly hip fracture patients using consolidated data on health insurance claims in medical and nursing care ]* | NHI/LSEHS | medical insurance claims and LTC insurance claims data                             | Others       | A municipality in Western Japan | 2012 | 2016 | Clinical epidemiology, course of diseases | Health policy evaluation and utilization  | Injury, poisoning and certain other consequences of external causes | hip fracture                                                                        | Older persons | older patients                     |
| Nishi 2019    | Comparison of regional with general anesthesia on mortality and perioperative length of stay in older patients after hip fracture surgery                                                                                        | NHI/LSEHS | Fukuoka Prefecture Regional Association for Late-Stage Healthcare for Older People | Prefecture   | Fukuoka Prefecture              | 2012 | 2016 | Intervention effect                       |                                           | Injury, poisoning and certain other consequences of external causes | hip fracture surgery (S72.0-2)                                                      | Older persons | Older People                       |
| Nishi 2018    | Association Between Financial Incentives for Regional Care Coordination and Health Care Resource Utilization Among Older Patients after Femoral Neck Fracture Surgery: A Retrospective Cohort Study Using a Claims Database      | NHI/LSEHS | Fukuoka Prefecture Regional Association for Late-Stage Healthcare for Older People | Prefecture   | Fukuoka                         | 2010 | 2016 | Health economics                          | Health policy evaluation and utilization  | Injury, poisoning and certain other consequences of external causes | hip fracture                                                                        | Older persons | 75 years or older                  |
| Shoda 2012    | Risk factors affecting in-hospital mortality after hip fracture: retrospective analysis using the Japanese Diagnosis Procedure Combination Database                                                                              | DPC       |                                                                                    | Nationwide   |                                 | 2007 | 2009 | Clinical epidemiology, course of diseases | Intervention effect                       | Injury, poisoning and certain other consequences of external causes | single hip fracture                                                                 | Others        | aged ≥60 years                     |
| Ogawa 2021    | Seasonal impact on surgical site infections in hip fracture surgery: Analysis of 330,803 cases using a nationwide inpatient database                                                                                             | DPC       |                                                                                    | Nationwide   |                                 | 2011 | 2016 | Clinical epidemiology, course of diseases |                                           | Injury, poisoning and certain other consequences of external causes | hip fracture                                                                        | Older persons | ≥65 years of age                   |
| Mine 2020     | Effectiveness of regional clinical pathways on postoperative length of stay for hip fracture patients: A retrospective observational study using the Japanese Diagnosis Procedure Combination database                           | DPC       |                                                                                    | Nationwide   |                                 | 2011 | 2013 | Intervention effect                       | Health policy evaluation and utilization  | Injury, poisoning and certain other consequences of external causes | hip fracture                                                                        |               |                                    |
| Tamaki 2019   | Estimates of hip fracture incidence in Japan using the National Health Insurance Claim Database in 2012-2015                                                                                                                     | NDB       | Aggregated data                                                                    | Nationwide   |                                 | 2012 | 2015 | Clinical epidemiology, course of diseases |                                           | Injury, poisoning and certain other consequences of external causes | hip fracture                                                                        | Others        | aged ≥40 years                     |
| Matsuda 2016  | Relationship Between Depressive State and Treatment Characteristics of Acute Cervical Spinal Cord Injury in Japan                                                                                                                | DPC       |                                                                                    | Nationwide   |                                 | 2010 | 2010 | Clinical epidemiology, course of diseases |                                           | Injury, poisoning and certain other consequences of external causes | unspecified injuries of cervical spinal cord (ICD-10 code: S14.1), depressive state |               | age group                          |
| Wada 2015     | Effectiveness of surgical rib fixation on prolonged mechanical ventilation in patients with traumatic rib fractures: A propensity score-matched analysis                                                                         | DPC       |                                                                                    | Nationwide   |                                 | 2010 | 2013 | Intervention effect                       |                                           | Injury, poisoning and certain other consequences of external causes | injuries including rib fractures (S223, S224, or S225)                              | Others        | excluded younger than 20 years     |
| Aso 2020      | Influence of the Fukushima Daiichi Nuclear Power Plant Accident on the Use of Computed Tomography in Children With Mild Head Injuries                                                                                            | JMDC      |                                                                                    | Nationwide   |                                 | 2008 | 2013 | Medical treatment status                  | Others                                    | Injury, poisoning and certain other consequences of external causes | mild head injuries, use of CT                                                       | Children      | patients aged ≤15 years            |
| Yamaoka 2020  | Incidence and Age Distribution of Hospitalized Presumptive and Possible Abusive Head Trauma of Children Under 12 Months Old in Japan                                                                                             | DPC       |                                                                                    | Nationwide   |                                 | 2010 | 2013 | Clinical epidemiology, course of diseases | Socioeconomic comparison                  | Injury, poisoning and certain other consequences of external causes | Abusive head trauma                                                                 | Children      | under 36 months old                |
| Maeda 2018    | Safety of Tranexamic Acid During Pediatric Trauma: A Nationwide Database Study                                                                                                                                                   | DPC       |                                                                                    | Nationwide   |                                 | 2010 | 2014 | Intervention effect                       |                                           | Injury, poisoning and certain other consequences of external causes | pediatric trauma                                                                    | Children      | less than or equal to 12 years old |
| Wada 2018     | Development and validation of an ICD-10-based disability predictive index for patients admitted to hospitals with trauma                                                                                                         | DPC       |                                                                                    | Nationwide   |                                 | 2010 | 2015 | Prediction model                          | Research methodology                      | Injury, poisoning and certain other consequences of external causes | trauma (S00 to T14)                                                                 | Others        | aged ≥15 years                     |
| Wada 2017     | Development and validation of a new ICD-10-based trauma mortality prediction scoring system using a Japanese national inpatient database                                                                                         | DPC       |                                                                                    | Nationwide   |                                 | 2007 | 2014 | Prediction model                          | Clinical epidemiology, course of diseases | Injury, poisoning and certain other consequences of external causes | injuries                                                                            |               | age group                          |
| Endo 2018     | [ASSOCIATION BETWEEN SEVERE TRAUMA PATIENT VOLUME, SURVIVAL BENEFIT, AND TOTAL HEALTHCARE COSTS ; ANALYSIS OF JAPANESE NATIONAL ADMINISTRATIVE DATABASE]                                                                         | DPC       |                                                                                    | Nationwide   |                                 | 2010 | 2015 | Health policy evaluation and utilization  | Health economics                          | Injury, poisoning and certain other consequences of external causes | Severe Trauma Patient                                                               | Others        | aged ≥16 years                     |
| Aso 2017      | Resuscitative endovascular balloon occlusion of the aorta or resuscitative thoracotomy with aortic clamping for noncompressible torso hemorrhage: A retrospective nationwide study                                               | DPC       |                                                                                    | Nationwide   |                                 | 2010 | 2014 | Intervention effect                       |                                           | Injury, poisoning and certain other consequences of external causes | trauma patients with uncontrolled hemorrhagic shock                                 | Others        | aged 15 years or older             |
| Miyamoto 2020 | Pregabalin and injury: A nested case-control and case-crossover study                                                                                                                                                            | JMDC      |                                                                                    | Nationwide   |                                 | 2014 | 2016 | Intervention effect                       |                                           | Injury, poisoning and certain other consequences of external causes | Diseases of the nervous system use of pregabalin and injury                         | Others        | patients aged ≥20 years            |

|                |                                                                                                                                                                                                                      |           |                                                                        |              |                                                       |      |      |                                           |                                          |                                                                     |                                                              |                                                                   |               |                                 |
|----------------|----------------------------------------------------------------------------------------------------------------------------------------------------------------------------------------------------------------------|-----------|------------------------------------------------------------------------|--------------|-------------------------------------------------------|------|------|-------------------------------------------|------------------------------------------|---------------------------------------------------------------------|--------------------------------------------------------------|-------------------------------------------------------------------|---------------|---------------------------------|
| Sumitani 2011  | Prevalence of malignant hyperthermia and relationship with anesthetics in Japan: data from the diagnosis procedure combination database                                                                              | DPC       |                                                                        | Nationwide   |                                                       | 2006 | 2008 | Intervention effect                       |                                          | Injury, poisoning and certain other consequences of external causes |                                                              | Malignant Hyperthermia (T883)                                     |               |                                 |
| Ono 2016       | Impact of Body Mass Index on the Outcomes of Open Reduction for Mandibular Fractures                                                                                                                                 | DPC       |                                                                        | Nationwide   |                                                       | 2010 | 2013 | Clinical epidemiology, course of diseases | Intervention effect                      | Injury, poisoning and certain other consequences of external causes |                                                              | mandibular fracture                                               | Others        | aged ≥18 years                  |
| Kishimoto 2018 | Suspected periprosthetic joint infection after total knee arthroplasty under propofol versus sevoflurane anesthesia: a retrospective cohort study                                                                    | DPC       |                                                                        | Nationwide   |                                                       | 2012 | 2015 | Intervention effect                       |                                          | Injury, poisoning and certain other consequences of external causes |                                                              | Periprosthetic joint infection                                    | Others        | exclude age <40                 |
| Suzuki 2014    | Impact of systemic steroids on posttonsillectomy bleeding: analysis of 61 430 patients using a national inpatient database in Japan                                                                                  | DPC       |                                                                        | Nationwide   |                                                       | 2007 | 2013 | Intervention effect                       |                                          | Injury, poisoning and certain other consequences of external causes | Others                                                       | postoperative bleeding after tonsillectomy                        | Others        | 50 years or older were excluded |
| Ohya 2017      | Seasonal Variations in the Risk of Reoperation for Surgical Site Infection Following Elective Spinal Fusion Surgery                                                                                                  | DPC       |                                                                        | Nationwide   |                                                       | 2010 | 2013 | Clinical epidemiology, course of diseases |                                          | Injury, poisoning and certain other consequences of external causes |                                                              | postoperative surgical site infection                             | Others        | aged 20 years or older          |
| Fukuda 2016    | Patient-related risk factors for surgical site infection following eight types of gastrointestinal surgery                                                                                                           | DPC       | DPC, JANIS                                                             | Nationwide   |                                                       | 2007 | 2011 | Clinical epidemiology, course of diseases |                                          | Injury, poisoning and certain other consequences of external causes |                                                              | Surgical site infections                                          |               |                                 |
| Kitazawa 2014  | Perioperative patient safety indicators and hospital surgical volumes                                                                                                                                                | DPC       |                                                                        | Nationwide   |                                                       | 2008 | 2010 | Quality of care                           | Health policy evaluation and utilization | Injury, poisoning and certain other consequences of external causes |                                                              | perioperative patient                                             |               |                                 |
| Sugihara 2014  | Does mechanical bowel preparation ameliorate damage from rectal injury in radical prostatectomy? Analysis of 151 rectal injury cases                                                                                 | DPC       |                                                                        | Nationwide   |                                                       | 2007 | 2012 | Intervention effect                       |                                          | Injury, poisoning and certain other consequences of external causes |                                                              | rectal injury                                                     |               |                                 |
| Sugihara 2012  | Management trends, angioembolization performance and multiorgan injury indicators of renal trauma from Japanese administrative claims database                                                                       | DPC       |                                                                        | Nationwide   |                                                       | 2006 | 2008 | Clinical epidemiology, course of diseases | Medical treatment status                 | Injury, poisoning and certain other consequences of external causes |                                                              | renal trauma (ICD-10 code: S37.0)                                 |               |                                 |
| Otake 2020     | Effectiveness of surgical fixation for rib fractures in relation to its timing: a retrospective Japanese nationwide study                                                                                            | DPC       |                                                                        | Nationwide   |                                                       | 2010 | 2018 | Intervention effect                       |                                          | Injury, poisoning and certain other consequences of external causes |                                                              | rib fractures (ICD-10 codes; S22.3-S22.5)                         |               |                                 |
| Otake 2020     | Early Versus Late Rib Fixation in Patients With Traumatic Rib Fractures: A Nationwide Study                                                                                                                          | DPC       |                                                                        | Nationwide   |                                                       | 2010 | 2018 | Intervention effect                       |                                          | Injury, poisoning and certain other consequences of external causes |                                                              | rib fractures (ICD-10 codes; S22.3-S22.5)                         |               |                                 |
| Ohya 2015      | Risks of in-hospital death and complications after fusion surgery in patients with atlantoaxial subluxation: analysis of 1090 patients using the Japanese Diagnosis Procedure Combination database                   | DPC       |                                                                        | Nationwide   |                                                       | 2007 | 2012 | Clinical epidemiology, course of diseases | Intervention effect                      | Injury, poisoning and certain other consequences of external causes | Diseases of the musculoskeletal system and connective tissue | Atlantoaxial Subluxation, rheumatoid arthritis                    | Others        | aged 20 years or older          |
| Wada 2018      | Impact of hospital volume on mortality in patients with severe torso injury                                                                                                                                          | DPC       |                                                                        | Nationwide   |                                                       | 2010 | 2014 | Health policy evaluation and utilization  |                                          | Injury, poisoning and certain other consequences of external causes |                                                              | severe torso injury                                               | Others        | aged ≥15 years                  |
| Obikane 2020   | Cumulative visits for care of minor injuries are associated with traumatic brain injury in young children                                                                                                            | JMDC      |                                                                        | Nationwide   |                                                       | 2009 | 2012 | Clinical epidemiology, course of diseases | Others                                   | Injury, poisoning and certain other consequences of external causes |                                                              | minor injuries, traumatic brain injuries                          | Children      | aged ≤36 months                 |
| Yamaoka 2020   | Impact of Number of Drugs on Rehabilitation Outcomes in Patients after Traumatic Brain Injury: A Retrospective Cohort Study                                                                                          | JMDC      |                                                                        | Nationwide   |                                                       | 2014 | 2017 | Intervention effect                       |                                          | Injury, poisoning and certain other consequences of external causes |                                                              | acute traumatic brain injury                                      | Others        | not included aged >90 years     |
| Nishina 2020   | [Investigation of Characteristics and Risk Factors for Death in Elderly People Who Suffered from Traumatic Brain Injury Occurred in Hospital]                                                                        | DPC       | DPC Study Group                                                        | Nationwide   |                                                       | 2010 | 2017 | Clinical epidemiology, course of diseases |                                          | Injury, poisoning and certain other consequences of external causes |                                                              | traumatic brain injury                                            | Older persons | 65 years old and older          |
| Obbe 2020      | Early enteral nutrition in patients with severe traumatic brain injury: a propensity score-matched analysis using a nationwide inpatient database in Japan                                                           | DPC       |                                                                        | Nationwide   |                                                       | 2014 | 2017 | Intervention effect                       |                                          | Injury, poisoning and certain other consequences of external causes |                                                              | traumatic brain injury                                            | Others        | aged ≥16 years                  |
| Tagami 2014    | Thoracic aortic injury in Japan: Nationwide retrospective cohort study                                                                                                                                               | DPC       |                                                                        | Nationwide   |                                                       | 2007 | 2013 | Clinical epidemiology, course of diseases | Medical treatment status                 | Injury, poisoning and certain other consequences of external causes |                                                              | traumatic thoracic aortic injury                                  | Others        | aged ≥18 years                  |
| Hamasaki 2020  | Incidence of clinical vertebral fractures and hip fractures of the elderly (65 years or over) population-large-scale data analysis using claim database in Kure City, Hiroshima, Japan                               | NHI/LSEHS | National Health Insurance (NHI) or Senior Elderly Care System (SECS)   | Municipality | Kure City                                             | 2015 | 2015 | Clinical epidemiology, course of diseases |                                          | Injury, poisoning and certain other consequences of external causes |                                                              | vertebral fractures                                               | Older persons | over 65 years of age            |
| Kobata 2020    | Effectiveness of Early Rehabilitation for Vertebral Compression Fractures: A Retrospective Cohort Study                                                                                                              | JMDC      |                                                                        | Nationwide   |                                                       | 2014 | 2018 | Intervention effect                       |                                          | Injury, poisoning and certain other consequences of external causes |                                                              | vertebral compression fracture                                    | Older persons | 65 years or older               |
| Hamasaki 2020  | [Incidence of clinical vertebral fractures and the rate for operation of the elderly in Kure City: large-scale claim database analysis]                                                                              | NHI/LSEHS | The National Health Insurance system and Late Elders' Health Insurance | Municipality | Kure City                                             | 2015 | 2015 | Clinical epidemiology, course of diseases | Medical treatment status                 | Injury, poisoning and certain other consequences of external causes |                                                              | clinical vertebral fractures                                      | Older persons | aged 65 and over                |
| Toba 2017      | [Develop a monitoring procedure for cases of bone fractures and intracranial bleeding due to falls based on integrating adverse event data extracted from medical fee information and other data]                    | DPC       | medical records                                                        | Others       | Medical Hospital, Tokyo Medical and Dental University | 2012 | 2015 | Research methodology                      |                                          | Injury, poisoning and certain other consequences of external causes |                                                              | Fractures, Intracranial Hemorrhages                               | Others        |                                 |
| 19) Others     |                                                                                                                                                                                                                      |           |                                                                        |              |                                                       |      |      |                                           |                                          |                                                                     |                                                              |                                                                   |               |                                 |
| Murata 2014    | Age-related differences in outcomes and etiologies of acute abdominal pain based on a national administrative database                                                                                               | DPC       |                                                                        | Nationwide   |                                                       | 2009 | 2011 | Clinical epidemiology, course of diseases |                                          | Others                                                              |                                                              | acute abdominal pain (R100)                                       |               | age groups                      |
| Kobayashi 2012 | [INVESTIGATION ON EVALUATION OF THE QUALITY OF MEDICAL CARE BASED ON CLINICAL INDICATORS BY THE UTILIZATION OF DIAGNOSIS PROCEDURE COMBINATION DATA]                                                                 | DPC       |                                                                        | Nationwide   |                                                       | 2010 | 2010 | Quality of care                           |                                          | Others                                                              |                                                              | medical care at acute care hospitals                              |               |                                 |
| Ueyama 2014    | Application of a self-controlled case series study to a database study in children                                                                                                                                   | MDV       |                                                                        | Nationwide   |                                                       | 2003 | 2011 | Research methodology                      | Health policy evaluation and utilization | Others                                                              |                                                              | diarrhea, bronchitis, and eczema related to palivizumab treatment | Children      | aged between 0 and 5 years      |
| Li 2021        | Characterizing the incidence of adverse events of special interest for COVID-19 vaccines across eight countries: a multinational network cohort study                                                                | JMDC      | 13 databases from eight countries                                      | Nationwide   |                                                       | 2017 | 2019 | Intervention effect                       | COVID-19                                 | Others                                                              |                                                              | adverse events of special interest for COVID-19 vaccines          |               | age groups                      |
| Koizumi 2021   | Effect of population inflow and outflow between rural and urban areas on regional antimicrobial use surveillance                                                                                                     | NDB       | Aggregated data                                                        | Nationwide   | national, prefectural, second medical area            | 2015 | 2015 | Medical treatment status                  | Socioeconomic comparison                 | Others                                                              |                                                              | antimicrobial consumption                                         |               | age category                    |
| Mita 2021      | An alternative index for evaluating AMU and anti-methicillin-resistant Staphylococcus aureus agent use: A study based on the National Database of Health Insurance Claims and Specific Health Checkups data of Japan | NDB       | Aggregated data                                                        | Nationwide   |                                                       | 2016 | 2016 | Medical treatment status                  | Research methodology                     | Others                                                              |                                                              | antimicrobial consumption                                         |               |                                 |
| Hashimoto 2020 | Indications and classes of outpatient antibiotic prescriptions in Japan: A descriptive study using the national database of electronic health insurance claims, 2012-2015                                            | NDB       |                                                                        | Nationwide   |                                                       | 2012 | 2015 | Medical treatment status                  |                                          | Others                                                              |                                                              | outpatient antibiotic prescriptions                               |               | age group                       |
| Maeda 2020     | Development of the predicted and standardized carbenem usage metric: Analysis of the Japanese Diagnosis Procedure Combination payment system data                                                                    | DPC       |                                                                        | Nationwide   |                                                       | 2017 | 2017 | Prediction model                          | Research methodology                     | Others                                                              |                                                              | antimicrobial consumption                                         |               |                                 |

|                |                                                                                                                                                                                                                                   |           |                                                                                                   |            |                                                |      |      |                                          |                                          |        |                                                     |               |                                  |
|----------------|-----------------------------------------------------------------------------------------------------------------------------------------------------------------------------------------------------------------------------------|-----------|---------------------------------------------------------------------------------------------------|------------|------------------------------------------------|------|------|------------------------------------------|------------------------------------------|--------|-----------------------------------------------------|---------------|----------------------------------|
| Ono 2020       | The first national survey of antimicrobial use among dentists in Japan from 2015 to 2017 based on the national database of health insurance claims and specific health checkups of Japan                                          | NDB       | Aggregated data                                                                                   | Nationwide |                                                | 2015 | 2017 | Medical treatment status                 | Others                                   |        | antimicrobial consumption                           |               |                                  |
| Kinoshita 2019 | Nationwide study of outpatient oral antimicrobial utilization patterns for children in Japan (2013-2016)                                                                                                                          | NDB       |                                                                                                   | Nationwide |                                                | 2013 | 2016 | Medical treatment status                 | Health policy evaluation and utilization | Others | antimicrobial consumption                           | Children      | <15 year of age                  |
| Tanaka 2019    | Evaluation of the usefulness of antimicrobial use survey using claims data                                                                                                                                                        | DPC       | claims data and electronic medical records                                                        | Others     | National Centre for Global Health and Medicine | 2016 | 2017 | Research methodology                     |                                          | Others | antimicrobial use                                   |               |                                  |
| Yamasaki 2018  | The first report of Japanese antimicrobial use measured by national database based on health insurance claims data (2011-2013): comparison with sales data, and trend analysis stratified by antimicrobial category and age group | NDB       | Aggregated data: sales data previously reported                                                   | Nationwide |                                                | 2011 | 2013 | Research methodology                     | Medical treatment status                 | Others | antimicrobial use                                   |               | age group                        |
| Gu 2011        | [Outpatient antimicrobial drug use and antimicrobial resistance frequency in Suwa area, Nagano, Japan]                                                                                                                            | NHI/LSEHS | NHI                                                                                               | Prefecture | Suwa, Nagano prefecture                        | 2009 | 2010 | Medical treatment status                 |                                          | Others | Antimicrobial Drug Use                              |               |                                  |
| Matsushita2011 | [Study on Prescription Status and Clinical Utility of Injectable Antimicrobial Agents by Retrospective Analysis of Multicenter Medical Cost Accounting Data]                                                                      | MDV       |                                                                                                   | Nationwide |                                                | 2006 | 2010 | Medical treatment status                 | Intervention effect                      | Others | Antimicrobial Drug Use                              |               |                                  |
| Goto 2019      | [Investigation on the current status surrounding biologics and the impact of biosimilars on drug cost using real world data]                                                                                                      | MDV       |                                                                                                   | Nationwide |                                                | 2012 | 2018 | Medical treatment status                 | Health economics                         | Others | biosimilar                                          |               |                                  |
| Sekimoto 2010  | [LINEAR REGRESSION MODELS PREDICT HOSPITAL-WIDE BLOOD PRODUCT USE]                                                                                                                                                                | DPC       | QIP                                                                                               | Nationwide |                                                | 2006 | 2008 | Prediction model                         | Medical treatment status                 | Others | blood product use                                   |               |                                  |
| Yonekura 2019  | Use of preoperative haemostasis and ABO blood typing tests in children: a retrospective observational study using a nationwide claims database in Japan                                                                           | JMDC      |                                                                                                   | Nationwide |                                                | 2012 | 2018 | Medical treatment status                 |                                          | Others | preoperative haemostasis and ABO blood typing tests | Children      | aged 1-17 years                  |
| Yonekura 2018  | Preoperative Blood Tests Conducted Before Low-Risk Surgery in Japan: A Retrospective Observational Study Using a Nationwide Insurance Claims Database                                                                             | JMDC      |                                                                                                   | Nationwide |                                                | 2012 | 2016 | Medical treatment status                 | Quality of care                          | Others | preoperative blood tests before low-risk surgery    | Others        | 20-64 years of age               |
| Tarasawa 2019  | [A Study on factors related to blood culture performing rate preceding broad-spectrum antimicrobial agent therapy : Analyses of clinical indicators using the DPC data]                                                           | DPC       | DPCR1                                                                                             | Nationwide |                                                | 2016 | 2017 | Medical treatment status                 |                                          | Others | Detection of bloodstream infections                 |               |                                  |
| Matsuda 2018   | [Big data analysis of medical and nursing care: An analysis of outpatient functions of chronic hospitals]*                                                                                                                        | NHI/LSEHS | medical insurance claims and LTC insurance claims data                                            | Others     | municipalities in Western Japan                | 2015 | 2015 | Health policy evaluation and utilization |                                          | Others | Chronic disease                                     | Older persons | Older People                     |
| Matsuda 2018   | [Big data analysis of medical and nursing care: An analysis of inpatient functions of chronic hospitals]*                                                                                                                         | NHI/LSEHS | medical insurance claims (The National Health Insurance system and Late Elders' Health Insurance) | Others     | municipalities in Western Japan                | 2015 | 2016 | Health policy evaluation and utilization |                                          | Others | Chronic disease                                     |               |                                  |
| Matsuda 2018   | [Big data analysis of medical and nursing care: An analysis of the structure of sickness of inpatients by classification of long-term care beds]*                                                                                 | NHI/LSEHS | medical insurance claims (The National Health Insurance system and Late Elders' Health Insurance) | Others     | municipalities in Western Japan                | 2015 | 2015 | Medical treatment status                 | Health policy evaluation and utilization | Others | chronic stage bed                                   | Older persons | Older People                     |
| Imai 2020      | Prescription of Colchicine with Other Dangerous Concomitant Medications: A Nationwide Survey Using the Japanese Claims Database                                                                                                   | JMDC      |                                                                                                   | Nationwide |                                                | 2014 | 2017 | Medical treatment status                 |                                          | Others | inappropriate colchicine prescriptions              |               |                                  |
| Lai 2018       | Applying a common data model to Asian databases for multinational pharmacoepidemiologic studies: opportunities and challenges                                                                                                     | JMDC      |                                                                                                   | Nationwide | Japan, Taiwan, Hong Kong, South Korea, and US  |      |      | Research methodology                     | Socioeconomic comparison                 | Others | multinational pharmacoepidemiologic studies         |               |                                  |
| Amano 2020     | The Prevalence and Characteristics of Older Japanese Adults with Polypharmacy, Based on Regionally Representative Health Insurance Claims Data                                                                                    | NHI/LSEHS | National Health Insurance and Late-stage Elderly Health Insurance                                 | Prefecture | Nagasaki                                       | 2016 | 2016 | Medical treatment status                 | Patient health service utilization       | Others | polypharmacy among elderly                          |               |                                  |
| Ishizaki 2020  | Drug prescription patterns and factors associated with polypharmacy in >1 million older adults in Tokyo                                                                                                                           | NHI/LSEHS | Tokyo Metropolitan Association of Medical Care for Senior Citizens                                | Prefecture | Tokyo                                          | 2014 | 2014 | Medical treatment status                 | Patient health service utilization       | Others | polypharmacy in older outpatients                   | Older persons | aged ≥75 years                   |
| Sato 2018      | Potentially Inappropriate Medication Prescribing and Risk of Unplanned Hospitalization among the Elderly: A Self-Matched, Case-Crossover Study                                                                                    | MDV       |                                                                                                   | Nationwide |                                                | 2009 | 2015 | Quality of care                          |                                          | Others | potentially inappropriate medication                | Older persons | patients aged 65 years and above |
| Iihara 2014    | [Survey of Usage of Medication with Driving with Prohibition or Caution by the National Health Insurance Claims Database in Japan]                                                                                                | NDB       | Sampling data                                                                                     | Nationwide |                                                | 2011 | 2011 | Medical treatment status                 |                                          | Others | prohibitions or cautions on driving                 | Others        | 25 years and older               |
| Akazawa 2010   | Potentially inappropriate medication use in elderly Japanese patients                                                                                                                                                             | JMDC      |                                                                                                   | Nationwide | (5 corporate health insurance societies)       | 2006 | 2007 | Quality of care                          |                                          | Others | potentially inappropriate medications               | Older persons | aged ≥65 years                   |
| Ogata 2019     | Lower-dose prescriptions in the post-marketing situation and the influencing factors thereon                                                                                                                                      | MDV       |                                                                                                   | Nationwide |                                                | 2015 | 2015 | Medical treatment status                 | Health policy evaluation and utilization | Others | lower-dose prescription drugs                       |               |                                  |
| Takahashi 2016 | Social network analysis of duplicative prescriptions: One-month analysis of medical facilities in Japan                                                                                                                           | JMDC      |                                                                                                   | Nationwide |                                                | 2012 | 2012 | Medical treatment status                 |                                          | Others | duplicative prescriptions                           |               | age group                        |

|                |                                                                                                                                                                                                                           |           |                                                                                             |              |                                                                                                 |      |      |                                           |                                           |        |                                  |                                                                                                                                                         |               |                                                                         |
|----------------|---------------------------------------------------------------------------------------------------------------------------------------------------------------------------------------------------------------------------|-----------|---------------------------------------------------------------------------------------------|--------------|-------------------------------------------------------------------------------------------------|------|------|-------------------------------------------|-------------------------------------------|--------|----------------------------------|---------------------------------------------------------------------------------------------------------------------------------------------------------|---------------|-------------------------------------------------------------------------|
| Brauer 2020    | Application of a Common Data Model (CDM) to rank the paediatric user and prescription prevalence of 15 different drug classes in South Korea, Hong Kong, Taiwan, Japan and Australia: an observational, descriptive study | JMDC      |                                                                                             | Nationwide   | South Korea, Hong Kong, Taiwan, Japan and Australia                                             | 2009 | 2013 | Medical treatment status                  | Socioeconomic comparison                  | Others |                                  | prescription prevalence of 15 different drug classes                                                                                                    | Children      | 18 years or younger                                                     |
| Seki 2015      | [Drug Utilization Study of Potential Drug-drug Interactions using the Sampling Dataset of the National Database of Health Insurance Claim Information]                                                                    | NDB       | Sampling data                                                                               | Nationwide   |                                                                                                 | 2011 | 2012 | Medical treatment status                  |                                           | Others |                                  | potential drug-drug interactions                                                                                                                        |               |                                                                         |
| Maeda 2016     | Investigation of the Existence of Supplier-Induced Demand in use of Gastrostomy Among Older Adults: A Retrospective Cohort Study                                                                                          | NHI/LSEHS | Late Elders' Health Insurance                                                               | Prefecture   | Fukuoka                                                                                         | 2010 | 2013 | Health policy evaluation and utilization  |                                           | Others |                                  | eating difficulties (F50: Eating disorders; J69: Pneumonitis due to solids and liquids; R13: Dysphagia; R630: Anorexia; and R633: Feeding difficulties) | Older persons | aged ≥75 years, or those aged 65 to 74 years with a specific disability |
| Kondo 2021     | Efficacy of Prophylactic Antibiotics during Extracorporeal Membrane Oxygenation: A Nationwide Cohort Study                                                                                                                | DPC       |                                                                                             | Nationwide   |                                                                                                 | 2010 | 2017 | Intervention effect                       |                                           | Others |                                  | patients receiving ECMO treatment                                                                                                                       | Others        | ≥18 year of age                                                         |
| Aso 2016       | In-hospital mortality and successful weaning from venoarterial extracorporeal membrane oxygenation: analysis of 5,263 patients using a national inpatient database in Japan                                               | DPC       |                                                                                             | Nationwide   |                                                                                                 | 2010 | 2013 | Clinical epidemiology, course of diseases |                                           | Others |                                  | receiving VA-ECMO (cardiogenic shock, pulmonary embolism, hypothermia, poisoning, or trauma)                                                            | Others        | aged ≥19 years                                                          |
| Muguruma 2020  | Epidemiology and volume-outcome relationship of extracorporeal membrane oxygenation for respiratory failure in Japan: A retrospective observational study using a national administrative database                        | DPC       |                                                                                             | Nationwide   |                                                                                                 | 2010 | 2018 | Intervention effect                       | Health policy evaluation and utilization  | Others |                                  | underwent ECMO                                                                                                                                          | Others        | aged ≥18 years                                                          |
| Kondo 2020     | Proton pump inhibitors versus histamine-2 receptor antagonists for stress ulcer prophylaxis during extracorporeal membrane oxygenation: a propensity score-matched analysis                                               | DPC       |                                                                                             | Nationwide   |                                                                                                 | 2010 | 2017 | Intervention effect                       |                                           | Others | Diseases of the digestive system | gastrointestinal bleeding (receiving ECMO)                                                                                                              | Others        | ≥18 year of age                                                         |
| Matsuda 2013   | Analysis of Transfer Distance of Emergency Stroke Cases in Kumamoto, Japan                                                                                                                                                | DPC       |                                                                                             | Prefecture   | Kumamoto                                                                                        | 2010 | 2010 | Health policy evaluation and utilization  |                                           | Others |                                  | emergency cases by pathology base (neurological, cardiologic, pediatric and injury cases)                                                               |               |                                                                         |
| Kuwahara 2010  | [Outline and problems of DPC system reform] Evaluation of emergency medical care using DPC data]*                                                                                                                         | DPC       | hospitals participated in the study group                                                   | Nationwide   |                                                                                                 | 2009 | 2009 | Medical treatment status                  | Health economics                          | Others |                                  | emergency medicine                                                                                                                                      |               |                                                                         |
| Sugtani 2016   | Postmarketing Benefit-Risk Assessment for Erythropoiesis-Stimulating Agents Using a Health Care Database                                                                                                                  | MDV       |                                                                                             | Nationwide   |                                                                                                 | 2011 | 2014 | Health policy evaluation and utilization  |                                           | Others |                                  | erythropoietin agents                                                                                                                                   | Others        | ≥15 years                                                               |
| Sekimoto 2010  | [RISK-ADJUSTED ASSESSMENT OF FRESH FROZEN PLASMA AND ALBUMIN PRODUCT USE IN ACUTE-CARE HOSPITALS IN JAPAN: AN ANALYSIS USING ADMINISTRATIVE DATA]                                                                         | DPC       | QIP                                                                                         | Nationwide   |                                                                                                 | 2006 | 2008 | Prediction model                          | Medical treatment status                  | Others |                                  | fresh frozen plasma (FFP) and albumin products                                                                                                          | Others        | adult                                                                   |
| Uchida 2011    | Impact of remifentanyl introduction on practice patterns in general anesthesia                                                                                                                                            | DPC       |                                                                                             | Nationwide   |                                                                                                 | 2006 | 2007 | Medical treatment status                  | Health policy evaluation and utilization  | Others |                                  | general anesthesia                                                                                                                                      |               |                                                                         |
| Takeda 2019    | Utilization of arterial pulse waveform analysis during non-cardiac surgery in Japan: a retrospective observational study using a nationwide claims database                                                               | MDV       |                                                                                             | Nationwide   |                                                                                                 | 2014 | 2016 | Medical treatment status                  |                                           | Others |                                  | non-cardiac surgery under general anesthesia with an arterial catheter                                                                                  | Others        | aged 18 years or older                                                  |
| Takeda 2020    | The association between arterial pulse waveform analysis device and in-hospital mortality in high-risk non-cardiac surgeries                                                                                              | MDV       |                                                                                             | Nationwide   |                                                                                                 | 2014 | 2016 | Intervention effect                       |                                           | Others |                                  | patients undergoing high-risk surgery under general anaesthesia                                                                                         |               |                                                                         |
| Ito 2019       | Can income-based co-payment rates improve disparity? The case of the choice between brand-name and generic drugs                                                                                                          | NHI/LSEHS | Medical Care System of Latter-stage Elderly                                                 | Prefecture   | a large prefecture                                                                              | 2013 | 2014 | Patient health service utilization        | Health policy evaluation and utilization  | Others |                                  | brand-name drug, generic drug                                                                                                                           | Older persons | ≥75 years of age                                                        |
| Kinoshita 2019 | Effect of tranexamic acid on mortality in patients with haemoptysis: a nationwide study                                                                                                                                   | DPC       |                                                                                             | Nationwide   |                                                                                                 | 2010 | 2017 | Intervention effect                       |                                           | Others |                                  | haemoptysis (ICD-10 code: R042)                                                                                                                         | Others        | age ≥18 years                                                           |
| Miyawaki 2019  | Effect of a medical subsidy on health service utilization among schoolchildren: A community-based natural experiment in Japan                                                                                             | NHI/LSEHS | NHI                                                                                         | Prefecture   | Prefecture N's NHI organization                                                                 | 2012 | 2017 | Health policy evaluation and utilization  | Health economics                          | Others |                                  | health service expenditure                                                                                                                              | Children      | aged 6-11 at baseline                                                   |
| Osawa 2020     | Machine-learning-based prediction models for high-need high-cost patients using nationwide clinical and claims data                                                                                                       | Others    | MinaCare                                                                                    | Nationwide   |                                                                                                 | 2013 | 2016 | Prediction model                          | Health economics                          | Others |                                  | High-need, high-cost patients                                                                                                                           | Others        | aged ≥18 years                                                          |
| Tanke 2019     | A challenge to all: A primer on inter-country differences of high-need, high-cost patients                                                                                                                                | Others    | Japanese data came from two prefectures of insurance claims of those not currently employed | Prefecture   | two prefectures (Canada, England, Germany, Japan, the Netherlands, Spain and the United States) | 2014 | 2014 | Health economics                          | Socioeconomic comparison                  | Others |                                  | high-need high-cost patients                                                                                                                            |               |                                                                         |
| Imahori 2019   | [Does income affect medical care and long-term care expenditures for the elderly? : Evidence from claims data of a municipality in Japan]                                                                                 | NHI/LSEHS | National Health Insurance and Latter-Stage Elderly Healthcare System, long-term care data   | Municipality | X city                                                                                          | 2014 | 2015 | Health economics                          | Socioeconomic comparison                  | Others |                                  | medical care expenditures                                                                                                                               | Others        | aged ≥66 years                                                          |
| Akiyama 2018   | Healthcare costs for the elderly in Japan: Analysis of medical care and long-term care claim records                                                                                                                      | NHI/LSEHS | MC (NHI) and LTC insurance data                                                             | Municipality | city A, Hokkaido                                                                                | 2007 | 2009 | Health economics                          | Clinical epidemiology, course of diseases | Others |                                  | healthcare costs                                                                                                                                        | Older persons | aged 65 years or older                                                  |

|                |                                                                                                                                                                                                                                                                                           |           |                                                                                                                              |              |                                                       |      |      |                                           |                                           |        |                                                                  |               |                                         |
|----------------|-------------------------------------------------------------------------------------------------------------------------------------------------------------------------------------------------------------------------------------------------------------------------------------------|-----------|------------------------------------------------------------------------------------------------------------------------------|--------------|-------------------------------------------------------|------|------|-------------------------------------------|-------------------------------------------|--------|------------------------------------------------------------------|---------------|-----------------------------------------|
| Akiyama 2017   | [Seasonal effects on healthcare costs: Using panel data from medical and long-term care claim records of the elderly in Hokkaido]                                                                                                                                                         | NHI/LSEHS | NHI and/or MC insurance systems for the elderly aged over 65 years old, LTC insurance data                                   | Municipality | city A, Hokkaido                                      | 2007 | 2009 | Health economics                          | Clinical epidemiology, course of diseases | Others | healthcare costs                                                 | Older persons | over 65 years old                       |
| Hiratsuka 2017 | [Relationships between medical expenditures and the Specific Health Checkups scheme in Japan: A Study of outpatient medical expenditures and questionnaire responses concerning lifestyle that form part of the Specific Health Checkups scheme in Japan]                                 | NHI/LSEHS | NHI                                                                                                                          | Municipality | Mishima City                                          | 2008 | 2012 | Health economics                          |                                           | Others | the annual outpatients medical expenditures                      |               |                                         |
| Fukushima 2016 | Patient cost sharing and medical expenditures for the Elderly                                                                                                                                                                                                                             | JMDC      |                                                                                                                              | Nationwide   |                                                       | 2005 | 2013 | Health policy evaluation and utilization  | Health economics                          | Others | medical spending                                                 | Older persons | elderly between 67 and 72 years old     |
| Tamaki 2014    | [Investigation of risk factors for increased medical expenses by matching data on health insurance claims: An analysis of questionnaires and each test item in specific health checkups]*                                                                                                 | NHI/LSEHS | NHI                                                                                                                          | Municipality | Mishima city                                          | 2008 | 2013 | Health economics                          |                                           | Others | medical expenditure                                              |               |                                         |
| Otsubo 2011    | Evaluation of resource allocation and supply-demand balance in clinical practice with high-cost technologies                                                                                                                                                                              | Others    | claims data from 16 sampled hospitals (QIP), National Survey of Medical Care Institutions and National Patient Survey (MHLW) | Nationwide   | 16 sampled hospitals (QIP)                            | 2001 | 2005 | Health policy evaluation and utilization  |                                           | Others | high-cost technologies (MRI, ESWL)                               |               |                                         |
| Tomio 2010     | [Association between the past health checkup results and health expenditures using the National Health Insurance claims data]                                                                                                                                                             | NHI/LSEHS | NHI                                                                                                                          | Municipality | a municipality in Kumamoto                            | 2006 | 2007 | Health economics                          |                                           | Others | medical expenditure                                              | Others        | aged 45-84 years                        |
| Mitsutake 2010 | [Examination of specific health guidance recipients based on specific health checkup data and medical expense data]*                                                                                                                                                                      | Others    | a health insurance society and NHI (5 Municipalities)                                                                        | Others       | a health insurance society and NHI (5 Municipalities) | 2008 | 2008 | Health economics                          | Others                                    | Others | special health check-up                                          |               |                                         |
| Mori 2020      | Association of long-term care needs, approaching death and age with medical and long-term care expenditures in the last year of life: An analysis of insurance claims data                                                                                                                | NHI/LSEHS | insurance claims (medical and LTC insurance systems) and death certificates                                                  | Municipality | Soma City                                             | 2006 | 2009 | Health economics                          |                                           | Others | medical and long-term care expenditures in the last year of life | Older persons | aged ≥65 years                          |
| Hamada 2019    | Household Income Relationship With Health Services Utilization and Healthcare Expenditures in People Aged 75 Years or Older in Japan: A Population-Based Study Using Medical and Long-term Care Insurance Claims Data                                                                     | NHI/LSEHS | medical and LTC claims                                                                                                       | Municipality | suburban city in the Tokyo                            | 2012 | 2013 | Socioeconomic comparison                  | Patient health service utilization        | Others | healthcare services utilization                                  | Older persons | aged 75 years or older                  |
| Yasui 2016     | [Analysis of the inpatient health care costs for the late elderly]                                                                                                                                                                                                                        | NHI/LSEHS | Fukuoka Prefecture WideArea Association of LatterStage Elderly Healthcare                                                    | Prefecture   | Fukuoka                                               | 2010 | 2014 | Health economics                          | Socioeconomic comparison                  | Others | inpatient health care costs                                      | Older persons | aged 75 years and older                 |
| Anzai 2011     | [A comparative analysis of medical expenses for elderly people with or without certification of long-term care need]*                                                                                                                                                                     | NHI/LSEHS | National Health Insurance, Health Care System for the Late Elderly                                                           | Prefecture   | Siga                                                  | 2008 | 2008 | Health economics                          |                                           | Others | medical expenses for the elderly                                 | Older persons | aged 65 years and above                 |
| Hashimoto 2010 | Micro data analysis of medical and long-term care utilization among the elderly in Japan                                                                                                                                                                                                  | NHI/LSEHS | medical care and LTC insurance by National Health Insurance                                                                  | Prefecture   | in a prefecture in the Kyushu district                | 2000 | 2004 | Health economics                          |                                           | Others | cost of end-of-life care for the elderly                         | Older persons | aged 65 and over                        |
| Noguchi 2010   | [[Empirical verification of medical and long-term care policies] Empirical verification based on National Health Insurance claims data of the impact of uneven distribution of medical resources on the range of medical consultations, the number of treatment days, and medical costs]* | NHI/LSEHS | WAM NET                                                                                                                      | Municipality | Nakatonrjetsu-chou                                    | 2003 | 2007 | Health economics                          | Health policy evaluation and utilization  | Others | health service utilization                                       |               |                                         |
| Tanihara 2012  | A comparison of disease-specific medical expenditures in Japan using the principal diagnosis method and the proportional distribution method                                                                                                                                              | JMDC      |                                                                                                                              | Nationwide   |                                                       | 2006 | 2006 | Health economics                          | Research methodology                      | Others | disease-specific medical expenditures                            |               |                                         |
| Shin 2020      | Economic impact of the first wave of the COVID-19 pandemic on acute care hospitals in Japan                                                                                                                                                                                               | DPC       | QIP                                                                                                                          | Nationwide   |                                                       | 2018 | 2020 | COVID-19                                  | Health economics                          | Others | hospital charges                                                 |               |                                         |
| Mimura 2019    | The Association Between Internet Searches and Moisturizer Prescription in Japan: Retrospective Observational Study                                                                                                                                                                        | JMDC      |                                                                                                                              | Nationwide   |                                                       | 2007 | 2017 | Medical treatment status                  |                                           | Others | identified heparinoid prescription                               |               |                                         |
| Koizumi 2018   | In-Hospital Mortality for Hepatic Portal Venous Gas: Analysis of 1590 Patients Using a Japanese National Inpatient Database                                                                                                                                                               | DPC       |                                                                                                                              | Nationwide   |                                                       | 2010 | 2015 | Clinical epidemiology, course of diseases |                                           | Others | hepatic portal venous gas (ICD-10 code R93.2)                    | Others        | less than 18 years of age were excluded |
| Teramoto 2019  | Impact of a national medical fee schedule revision on the cessation of physician home visits among older patients in Tokyo: A retrospective study                                                                                                                                         | NHI/LSEHS | Tokyo Metropolitan Association of Medical Care Services for Older Senior Citizens                                            | Prefecture   | Tokyo                                                 | 2014 | 2014 | Health policy evaluation and utilization  |                                           | Others | physician home visits                                            | Older persons | aged 75 years or older                  |
| Matsuda 2018   | [Big data analysis of medical and nursing care: An analysis of user characteristics by type of home medical treatment]*                                                                                                                                                                   | NHI/LSEHS | medical insurance claims and LTC insurance claims data                                                                       | Others       | A municipality in Western Japan                       | 2015 | 2015 | Medical treatment status                  |                                           | Others | in-home medical care                                             |               |                                         |

|                |                                                                                                                                                                                                                                                                  |           |                                                                                                         |              |                                     |      |      |                                           |                                          |                                                        |                                                                                                                                                    |                                         |                        |
|----------------|------------------------------------------------------------------------------------------------------------------------------------------------------------------------------------------------------------------------------------------------------------------|-----------|---------------------------------------------------------------------------------------------------------|--------------|-------------------------------------|------|------|-------------------------------------------|------------------------------------------|--------------------------------------------------------|----------------------------------------------------------------------------------------------------------------------------------------------------|-----------------------------------------|------------------------|
| Matsuda 2018   | [Big data analysis of medical and nursing care: An analysis of the current status of home care management guidance by pharmacists]*                                                                                                                              | NHI/LSEHS | medical insurance claims and LTC insurance claims data                                                  | Others       | A municipality in Western Japan     | 2016 | 2016 | Medical treatment status                  | Others                                   | home medication management and guidance by pharmacists | Older persons                                                                                                                                      | Older People                            |                        |
| Matsuda 2018   | [Big data analysis of medical and nursing care: An analysis of characteristics of elderly people requiring home nursing care by frequency of home nursing care]*                                                                                                 | NHI/LSEHS | medical insurance claims and LTC insurance claims data                                                  | Others       | A municipality in Western Japan     | 2015 | 2015 | Health policy evaluation and utilization  | Others                                   | home care service                                      | Older persons                                                                                                                                      | Older People                            |                        |
| Matsuda 2018   | [Big data analysis of medical and nursing care: An analysis of user characteristics by type of home nursing care]*                                                                                                                                               | NHI/LSEHS | medical insurance claims and LTC insurance claims data                                                  | Others       | A municipality in Western Japan     | 2015 | 2015 | Health policy evaluation and utilization  | Others                                   | home nursing care                                      |                                                                                                                                                    |                                         |                        |
| Ishizaki 2018  | [Home medical treatment by a medical institution outside Tokyo for home care patients who have an insurance card address in Tokyo]*                                                                                                                              | NHI/LSEHS |                                                                                                         | Prefecture   | Tokyo                               | 2014 | 2014 | Medical treatment status                  | Others                                   | in-home medical care                                   | Older persons                                                                                                                                      | aged ≥75 years                          |                        |
| Naruse 2017    | Measurement of special access to home visit nursing services among Japanese disabled elderly people: using GIS and claim data                                                                                                                                    | NHI/LSEHS | medical and long-term care insurance claims data                                                        | Prefecture   | A Prefecture                        | 2010 | 2010 | Health policy evaluation and utilization  | Others                                   | access to home visit nursing                           | Older persons                                                                                                                                      | aged ≥75 years                          |                        |
| Kato 2017      | Effect of reducing cost sharing for outpatient care on children's inpatient services in Japan                                                                                                                                                                    | DPC       |                                                                                                         | Nationwide   |                                     | 2012 | 2013 | Health policy evaluation and utilization  | Medical treatment status                 | Others                                                 | overall hospital admissions                                                                                                                        | Children<br>children                    |                        |
| Tarasawa 2020  | [The characteristics of hospitalized patients and the proportion of hospitalization by ambulance from the viewpoint of presence or absence of home medical care before hospitalization : Cross-sectional analysis using large-scale DPC data for elderly people] | DPC       |                                                                                                         | Nationwide   |                                     | 2016 | 2016 | Clinical epidemiology, course of diseases | Medical treatment status                 | Others                                                 | hospitalized patients                                                                                                                              | Older persons<br>65 years old and older |                        |
| Matsuda 2019   | [An analysis of the current status of hospitalization from nursing homes and welfare facilities based on DPC data]*                                                                                                                                              | DPC       | DPC Study Group                                                                                         | Nationwide   |                                     | 2016 | 2016 | Socioeconomic comparison                  | Others                                   | Hospitalizations from nursing home                     | Older persons                                                                                                                                      | Older People                            |                        |
| Jeon 2018      | Potentially avoidable hospitalizations, non-potentially avoidable hospitalizations and in-hospital deaths among residents of long-term care facilities                                                                                                           | NHI/LSEHS | Long-term care and national health insurance claims data                                                | Municipality | a suburban city of Chiba prefecture | 2012 | 2013 | Clinical epidemiology, course of diseases | Socioeconomic comparison                 | Others                                                 | potentially avoidable hospitalizations                                                                                                             | Older persons                           | aged ≥75 years         |
| Mitsutake 2018 | [The associations between readmission within 30 days and the medical institute factors among older patients receiving home medical care]                                                                                                                         | NHI/LSEHS |                                                                                                         | Prefecture   | Tokyo                               | 2013 | 2014 | Clinical epidemiology, course of diseases | Health policy evaluation and utilization | Others                                                 | readmission                                                                                                                                        | Older persons                           | aged 75 years or older |
| Sasabuchi 2018 | Effect of the 2016 Kumamoto earthquakes on preventable hospital admissions: a retrospective cohort study in Japan                                                                                                                                                | NHI/LSEHS | National Health Insurance, Late Elders' Health Insurance                                                | Prefecture   | Kumamoto                            | 2013 | 2016 | Medical treatment status                  | Others                                   | Others                                                 | preventable hospital admissions                                                                                                                    |                                         |                        |
| Yuda 2018      | The medical assistance system and inpatient health care provision: Empirical evidence from short-term hospitalizations in Japan                                                                                                                                  | Others    | Survey of Medical Care Activities in Public Health Insurance, Fact-finding Survey on Medical Assistance | Nationwide   |                                     | 2000 | 2010 | Medical treatment status                  | Socioeconomic comparison                 | Others                                                 | short-term inpatient health care provision                                                                                                         |                                         |                        |
| Yano 2019      | Establishing a hospital transfusion management system promotes appropriate clinical use of human albumin in Japan: a nationwide retrospective study                                                                                                              | DPC       |                                                                                                         | Nationwide   |                                     | 2012 | 2016 | Medical treatment status                  | Health policy evaluation and utilization | Others                                                 | use of human albumin                                                                                                                               | Others                                  | aged 15 years or older |
| Iwagami 2015   | Choice of renal replacement therapy modality in intensive care units: data from a Japanese Nationwide Administrative Claim Database                                                                                                                              | DPC       |                                                                                                         | Nationwide   |                                     | 2011 | 2011 | Medical treatment status                  | Intervention effect                      | Others                                                 | adult patients admitted to ICUs                                                                                                                    | Others                                  | aged 20 years or older |
| Ohnuma 2018    | Predictors associated with unplanned hospital readmission of medical and surgical intensive care unit survivors within 30 days of discharge                                                                                                                      | DPC       |                                                                                                         | Nationwide   |                                     | 2012 | 2014 | Clinical epidemiology, course of diseases | Medical treatment status                 | Others                                                 | ICU survivors                                                                                                                                      | Others                                  | aged ≥18 years         |
| Hayashida 2013 | [Revenue and cost in Japanese ICU focused on the use of life-support system and length of stay in the diagnosis procedure combination/per-diem payment system]                                                                                                   | DPC       | hospitals participated in the research group                                                            | Nationwide   |                                     | 2010 | 2010 | Health economics                          |                                          | Others                                                 | ICU                                                                                                                                                |                                         |                        |
| Tarasawa 2021  | [Evaluation of Unknown Registration and Utilization of SOFA Score : Analyses of ICU Emergency Inpatients Using Large-scale DPC Data]                                                                                                                             | DPC       | DPC Research Institute                                                                                  | Nationwide   |                                     | 2018 | 2019 | Research methodology                      |                                          | Others                                                 | SOFA Score                                                                                                                                         | Others                                  | aged ≥15 years         |
| Sakai 2021     | Decreased Administration of Life-Sustaining Treatment just before Death among Older Inpatients in Japan: A Time-Trend Analysis from 2012 through 2014 Based on a Nationally Representative Sample                                                                | NDB       | Sampling data                                                                                           | Nationwide   |                                     | 2012 | 2014 | Medical treatment status                  |                                          | Others                                                 | administration of life-sustaining treatments (LSTs) and intensive care unit (ICU) admissions just before death in older inpatients                 | Older persons                           | aged ≥65 years         |
| Ohbe 2021      | Intensive care unit occupancy in Japan, 2015-2018: a nationwide inpatient database study                                                                                                                                                                         | DPC       |                                                                                                         | Nationwide   |                                     | 2015 | 2018 | Health economics                          | Health policy evaluation and utilization | Others                                                 | ICU bed occupancy                                                                                                                                  |                                         |                        |
| Sasabuchi 2015 | The Volume-Outcome Relationship in Critically Ill Patients in Relation to the ICU-to-Hospital Bed Ratio                                                                                                                                                          | DPC       |                                                                                                         | Nationwide   |                                     | 2007 | 2012 | Health policy evaluation and utilization  |                                          | Others                                                 | ICU admitted patients                                                                                                                              | Others                                  | aged ≥18 years         |
| Hayashida 2013 | [Revenue and cost in Japanese ICU focused on the use of life-support system and length of stay in the diagnosis procedure combination/per-diem payment system]                                                                                                   | DPC       |                                                                                                         | Nationwide   |                                     | 2010 | 2010 | Health economics                          |                                          | Others                                                 | ICU                                                                                                                                                |                                         |                        |
| Tomio 2017     | Tuberculosis screening prior to anti-tumor necrosis factor therapy among patients with immune-mediated inflammatory diseases in Japan: a longitudinal study using a large-scale health insurance claims database                                                 | JMDC      |                                                                                                         | Nationwide   |                                     | 2013 | 2014 | Medical treatment status                  | Quality of care                          | Others                                                 | immune-mediated inflammatory diseases (M05-06 for rheumatoid arthritis, K50 for Crohn's disease, K51 for ulcerative colitis and L40 for psoriasis) | Others                                  | aged 15-69 years       |
| Yamana 2020    | Outpatient Prescriptions of Kampo Formulations in Japan                                                                                                                                                                                                          | JMDC      |                                                                                                         | Nationwide   |                                     | 2017 | 2018 | Medical treatment status                  |                                          | Others                                                 | patients with outpatient prescriptions of Kampo extract formulations                                                                               |                                         |                        |
| Michihata 2018 | [Japanese Herbal Kampo Medicine for Pediatric Inpatients in Japan : A Retrospective Nationwide Study]                                                                                                                                                            | DPC       | DPCRI                                                                                                   | Nationwide   |                                     | 2014 | 2015 | Medical treatment status                  |                                          | Others                                                 | Herbal Kampo medicine                                                                                                                              | Children                                | aged <20 years         |
| Katayama 2013  | Prescription of kampo drugs in the Japanese health care insurance program                                                                                                                                                                                        | Others    | health care claim records, which had been collected by MHLW                                             | Nationwide   |                                     | 2009 | 2009 | Medical treatment status                  |                                          | Others                                                 | Prescription of Kampo Drugs                                                                                                                        |                                         |                        |

|                |                                                                                                                                                                         |           |                                                                                       |              |                                                                                |      |      |                                           |                                           |        |  |                                                                                                                                                                                                         |               |                                                 |
|----------------|-------------------------------------------------------------------------------------------------------------------------------------------------------------------------|-----------|---------------------------------------------------------------------------------------|--------------|--------------------------------------------------------------------------------|------|------|-------------------------------------------|-------------------------------------------|--------|--|---------------------------------------------------------------------------------------------------------------------------------------------------------------------------------------------------------|---------------|-------------------------------------------------|
| Hayashida 2016 | The relationship between sedative drug utilization and outcomes in critically ill patients undergoing mechanical ventilation                                            | DPC       | QIP                                                                                   | Nationwide   |                                                                                | 2008 | 2010 | Intervention effect                       | Medical treatment status                  | Others |  | undergoing mechanical ventilation                                                                                                                                                                       | Others        | aged ≥20 years                                  |
| Sasaki 2016    | Hospital Volume and Mortality in Mechanically Ventilated Children: Analysis of a National Inpatient Database in Japan                                                   | DPC       |                                                                                       | Nationwide   |                                                                                | 2010 | 2013 | Health policy evaluation and utilization  |                                           | Others |  | mechanical ventilation                                                                                                                                                                                  | Children      | 15 years old or younger                         |
| Yagi 2021      | Outcomes After Intensive Rehabilitation for Mechanically Ventilated Patients: A Nationwide Retrospective Cohort Study                                                   | DPC       |                                                                                       | Nationwide   |                                                                                | 2010 | 2016 | Intervention effect                       |                                           | Others |  | patients with mechanical ventilation in intensive care units                                                                                                                                            | Others        | 20 years and older                              |
| Ibayashi 2021  | Estimation of the number of patients with mitochondrial diseases: A descriptive study using a nationwide database in Japan                                              | NDB       |                                                                                       | Nationwide   |                                                                                | 2018 | 2019 | Clinical epidemiology, course of diseases |                                           | Others |  | mitochondrial disease (ICD10: D640, E744.E888, G318, G713, H472, H494, H498)                                                                                                                            |               |                                                 |
| Matsumoto 2021 | Changes in the Penetration Rate of Biosimilar Infliximab Within Japan Using a Japanese Claims Database                                                                  | MDV       |                                                                                       | Nationwide   |                                                                                | 2013 | 2019 | Medical treatment status                  |                                           | Others |  | rheumatoid arthritis (M05, M06), Crohn's disease (K50), ulcerative colitis (K51), and psoriasis (L40) (ICD10)                                                                                           |               |                                                 |
| Yamana 2017    | Validity of diagnoses, procedures, and laboratory data in Japanese administrative data                                                                                  | DPC       | NHO, chart review results as reference standards                                      | Others       | four acute-care HMO hospitals (Shizuoka, Kochi, Fukuoka, and Saga Prefectures) | 2014 | 2015 | Research methodology                      |                                           | Others |  | 16 diseases                                                                                                                                                                                             | Others        | aged ≥18 years                                  |
| Yamana 2015    | Categorized diagnoses and procedure records in an administrative database improved mortality prediction                                                                 | DPC       |                                                                                       | Nationwide   |                                                                                | 2012 | 2013 | Prediction model                          | Clinical epidemiology, course of diseases | Others |  | acute myocardial infarction, congestive heart failure, acute cerebrovascular disease, gastrointestinal hemorrhage, pneumonia, or septicemia                                                             | Others        | adult patients (≥18 years)                      |
| Sano 2021      | Large decrease in paediatric hospitalisations during the COVID-19 outbreak in Japan                                                                                     | MDV       |                                                                                       | Nationwide   |                                                                                | 2017 | 2020 | COVID-19                                  | Medical treatment status                  | Others |  | paediatric hospitalisations (food allergy, acute lower respiratory infections, Kawasaki disease, intestinal infectious diseases, febrile convulsions, asthma, appendicitis, inguinal hernia and trauma) | Children      | aged 1–17 years                                 |
| Mitsutake 2019 | Patterns of Co-Occurrence of Chronic Disease Among Older Adults in Tokyo, Japan                                                                                         | NHI/LSEHS | Tokyo Extended Association of Medical Care System for the Latter-Stage Elderly People | Prefecture   | Tokyo                                                                          | 2013 | 2014 | Clinical epidemiology, course of diseases |                                           | Others |  | 22 chronic diseases                                                                                                                                                                                     | Older persons | aged 75 or older                                |
| Narusue 2015   | Diseases that precede disability among latter-stage elderly individuals in Japan                                                                                        | NHI/LSEHS | long-term care insurance system                                                       | Prefecture   | Fukui                                                                          | 2011 | 2012 | Clinical epidemiology, course of diseases | Health policy evaluation and utilization  | Others |  | nine types of diseases as predisposing factors for disability (cancer, cerebrovascular disorder, arthropathy, fracture, pneumonia, dementia, psychiatric disorder, neurological disorder)               | Older persons | aged 75 years or older                          |
| Moriwaki 2018  | [Evaluation of healthcare safety indicators by the Diagnosis Procedure Combination data]                                                                                | DPC       |                                                                                       | Nationwide   |                                                                                | 2014 | 2015 | Quality of care                           |                                           | Others |  | 6 healthcare safety indicators                                                                                                                                                                          |               |                                                 |
| Yamana 2015    | Procedure-based severity index for inpatients: development and validation using administrative database                                                                 | DPC       |                                                                                       | Nationwide   |                                                                                | 2012 | 2013 | Prediction model                          | Research methodology                      | Others |  | acute myocardial infarction, congestive heart failure, acute cerebrovascular disease, gastrointestinal hemorrhage, pneumonia, or septicemia                                                             | Others        | ≥18 years                                       |
| Fujiu 2018     | Evaluation of Regional Vulnerability to Disasters by People of Ishikawa, Japan: A Cross Sectional Study Using National Health Insurance Data                            | NHI/LSEHS | KDB (national health insurance data)                                                  | Municipality | Hakui City in Ishikawa Prefecture                                              | 2015 | 2015 | Health policy evaluation and utilization  |                                           | Others |  | disaster-vulnerable patients (specifically, heart disease, CVD, dialysis)                                                                                                                               | Others        | at least 40 years old                           |
| Murata 2013    | Association between ambulance distance to hospitals and mortality from acute diseases in Japan: national database analysis                                              | DPC       |                                                                                       | Nationwide   |                                                                                | 2008 | 2008 | Socioeconomic comparison                  | Clinical epidemiology, course of diseases | Others |  | acute diseases (acute myocardial infarction, brain infarction, subarachnoid hemorrhage, and pneumonia)                                                                                                  |               |                                                 |
| Takeda 2016    | Estimating the Ratio of Patients with a Certain Disease Between Hospitals for the Allocation of Patients to Clinical Trials Using Health Insurance Claims Data in Japan | Others    | health insurance claims data, chart review                                            | Others       | Osaka University Hospital                                                      | 2015 | 2015 | Research methodology                      |                                           | Others |  | 329 diseases                                                                                                                                                                                            | Others        | <20 years of age (F90-F98)                      |
| Shimizu 2014   | Assessment of Medical Information Databases to Estimate Patient Numbers                                                                                                 | Others    | JMDC, MDV, JMIRI (IMS-JPM)                                                            | Nationwide   |                                                                                | 2009 | 2012 | Research methodology                      |                                           | Others |  | Seven diseases: benign prostatic hyperplasia, Parkinson's disease, herpes zoster, gout, asthma, epilepsy, and atopic dermatitis                                                                         |               |                                                 |
| Kasamo 2021    | Changes in prescribing trends and initial pharmacotherapy of children with nocturnal enuresis in Japan: a large-scale medical claims database analysis                  | JMDC      |                                                                                       | Nationwide   |                                                                                | 2005 | 2019 | Medical treatment status                  |                                           | Others |  | Nocturnal enuresis (ICD-10:R32)                                                                                                                                                                         | Children      | children < 16 years                             |
| Nakatani 2021  | Data resource profile of Shizuoka Kokuho Database (SKDB) using integrated health- and care-insurance claims and health checkups: the Shizuoka Study                     | NHI/LSEHS | Shizuoka Kokuho Database                                                              | Prefecture   | Shizuoka Prefecture                                                            | 2012 | 2018 | Research methodology                      |                                           | Others |  | not specified                                                                                                                                                                                           |               |                                                 |
| Shin 2020      | New outcome-specific comorbidity scores excelled in predicting in-hospital mortality and healthcare charges in administrative databases                                 | DPC       | QIP database                                                                          | Nationwide   |                                                                                | 2016 | 2018 | Prediction model                          | Clinical epidemiology, course of diseases | Others |  | comorbidities composing Charlson comorbidity index (CCI), Elixhauser comorbidity (EC), Gagne's combined comorbidity scores                                                                              | Others        | aged ≥18 years                                  |
| Shinjo 2017    | The degree of severity and trends in hospital standardized mortality ratios in Japan between 2008 and 2012: a retrospective observational study                         | DPC       |                                                                                       | Nationwide   |                                                                                | 2008 | 2012 | Prediction model                          | Health policy evaluation and utilization  | Others |  | Hospital standardized mortality ratio                                                                                                                                                                   | Others        | did not include patients less than 15 years old |



|                |                                                                                                                                                                                                                                      |           |                                                                                        |              |                                                                       |      |      |                                          |                                           |        |               |                                                                                  |
|----------------|--------------------------------------------------------------------------------------------------------------------------------------------------------------------------------------------------------------------------------------|-----------|----------------------------------------------------------------------------------------|--------------|-----------------------------------------------------------------------|------|------|------------------------------------------|-------------------------------------------|--------|---------------|----------------------------------------------------------------------------------|
| Tanihara 2015  | Assessment of text documentation accompanying uncoded diagnoses in computerized health insurance claims in Japan                                                                                                                     | NHI/LSEHS | National Health Insurance Organization of Kumamoto Prefecture                          | Prefecture   | Kumamoto                                                              | 2010 | 2010 | Research methodology                     |                                           | Others |               | all disease categories                                                           |
| Oba 2013       | Claims-based definition of death in Japanese claims database: validity and implications                                                                                                                                              | JMDC      |                                                                                        | Nationwide   |                                                                       | 2005 | 2009 | Research methodology                     |                                           | Others | Not specified | Others aged 20 to 74                                                             |
| Sato 2012      | Impact of teaching intensity and academic status on medical resource utilization by teaching hospitals in Japan                                                                                                                      | DPC       | study group                                                                            | Nationwide   | 40 national university academic teaching hospitals                    | 2004 | 2004 | Health economics                         |                                           | Others | Not specified |                                                                                  |
| Ohbe 2019      | Physician-manned prehospital emergency care in tertiary emergency centers in Japan                                                                                                                                                   | DPC       |                                                                                        | Nationwide   |                                                                       | 2014 | 2015 | Medical treatment status                 | Clinical epidemiology, course of diseases | Others |               | physician-manned prehospital emergency medical service                           |
| Sato 2019      | Enabling Patient Traceability Using Anonymized Personal Identifiers in Japanese Universal Health Insurance Claims Database                                                                                                           | Others    | national-level insurance claims data (NDB) and prefectural-level insurance claims data | Nationwide   | municipality-administered health insurance programs in Mie Prefecture | 2009 | 2014 | Research methodology                     |                                           | Others | Not specified |                                                                                  |
| Kubo 2017      | [The need and key points for patient matching in clinical studies using the National Database of Health Insurance Claims and Specific Health Checkups of Japan (NDB)]                                                                | NDB       |                                                                                        | Nationwide   |                                                                       | 2013 | 2014 | Research methodology                     |                                           | Others |               | patient matching                                                                 |
| Noda 2017      | [Improvements and verification of the patient matching (name matching) method in health insurance claims information and National DataBase (NDB) on specific medical checkups]*                                                      | NDB       |                                                                                        | Nationwide   |                                                                       | 2013 | 2014 | Research methodology                     |                                           | Others |               | patient matching                                                                 |
| Nagamine 2016  | [Consultation trends before and after the introduction of the subsidy system for child medical expenses in municipalities: From an analysis of health insurance claims from City A before and after the introduction of the system]* | NHI/LSEHS | NHI                                                                                    | Municipality | A city                                                                | 2009 | 2013 | Health policy evaluation and utilization |                                           | Others |               | use of medications and health care services Children school-age children         |
| Matsuda 2015   | A Pilot Study of Developing the Health Data Analysis System in the Japanese Occupational Setting                                                                                                                                     | Others    | claim data of one enterprise managed health insurance                                  | Others       | one enterprise managed health insurance                               | 2011 | 2012 | Health policy evaluation and utilization |                                           | Others |               | natural history of various diseases                                              |
| Tanihara 2011  | A statistical analysis of 'rule-out' diagnoses in outpatient health insurance claims in Japan                                                                                                                                        | Others    | corporate health insurance societies                                                   | Others       | corporate health insurance societies                                  | 2006 | 2006 | Medical treatment status                 |                                           | Others |               | 'rule-out' diagnoses                                                             |
| Kawaguchi 2010 | [Study about Evaluation of Hospital Efficiency and Function Used by DPC Data Set]                                                                                                                                                    | DPC       |                                                                                        | Nationwide   |                                                                       | 2005 | 2007 | Research methodology                     | Health policy evaluation and utilization  | Others |               | Not specified                                                                    |
| Fukuda 2019    | [The Development of Dataset Tables for NDB Analyses]                                                                                                                                                                                 | NDB       |                                                                                        | Nationwide   |                                                                       | 2009 | 2016 | Research methodology                     |                                           | Others |               | Not specified                                                                    |
| Fukuda 2019    | [A comparison of correction methods for medical fee revisions in health expenditure analyses using claims data]                                                                                                                      | NDB       |                                                                                        | Nationwide   |                                                                       | 2009 | 2016 | Research methodology                     |                                           | Others |               | Not specified                                                                    |
| Imai 2017      | [Development and Validation of a Medicationbased Comorbidity Index for Use with an Administrative Database in Japan]                                                                                                                 | Others    | NHO: National Hospital Organization                                                    | Nationwide   |                                                                       | 2011 | 2013 | Prediction model                         | Clinical epidemiology, course of diseases | Others |               | comorbidity index Others aged ≥15 years                                          |
| Bono 2017      | [Approach Aiming at the Increase with the Discharge Drug Information Management Instruction Charges Calculation Method Review]                                                                                                       | DPC       | Federation of National Public Services Personnel Mutual Aid Associations               | Nationwide   |                                                                       | 2015 | 2016 | Medical treatment status                 |                                           | Others |               | Discharge drug information management instruction charges                        |
| Ohtsu 2014     | [The Impact of Short-term Health Insurance Card and Eligibility Certification Card on Health Care Access in Japan : Findings from National Health Insurance Receipt Data]                                                            | NHI/LSEHS | short-term health insurance card and eligibility certification card data               | Municipality | X city                                                                | 2008 | 2011 | Health policy evaluation and utilization | Patient health service utilization        | Others |               | Not specified Others Excludes children under high school age and seniors over 75 |
| Tanihara 2012  | Estimating medical expenditures spent on rule-out diagnoses in Japan                                                                                                                                                                 | Others    | corporate health insurance societies                                                   | Others       | corporate health insurance societies                                  | 2006 | 2006 | Health economics                         | Medical treatment status                  | Others |               | Not specified                                                                    |
| Nishi 2012     | [Study of the indicators of affordable healthcare planning using electronic medical claim data]                                                                                                                                      | NHI/LSEHS | Fukuoka National Health Insurance Organization                                         | Prefecture   | Fukuoka                                                               | 2009 | 2010 | Research methodology                     | Health policy evaluation and utilization  | Others |               | affordable healthcare planning                                                   |

|               |                                                                                                                                                                                                  |           |                                                                                                                                                 |              |                                      |      |      |                                           |                                           |                                                                       |                            |                         |                        |
|---------------|--------------------------------------------------------------------------------------------------------------------------------------------------------------------------------------------------|-----------|-------------------------------------------------------------------------------------------------------------------------------------------------|--------------|--------------------------------------|------|------|-------------------------------------------|-------------------------------------------|-----------------------------------------------------------------------|----------------------------|-------------------------|------------------------|
| Itoh 2021     | Comparison of progression of care-need levels among long-term care recipients with and without advanced care management in a rural municipality of Japan: A population-based observational study | NHI/LSEHS | medical care claim records from a rural municipal government and the Survey of Long-Term Care Benefit Expenditures                              | Others       | A rural municipality in Japan        | 2012 | 2017 | Intervention effect                       | Others                                    | progression of care-need levels among long-term care recipients       | Older persons              | aged ≥65 years          |                        |
| Kim 2021      | Comparison of care utilisation and medical institutional death among older adults by home care facility type: a retrospective cohort study in Fukuoka, Japan                                     | NHI/LSEHS | medical claims database and an LTC insurance claims database (provided by the Fukuoka Prefecture Association of Latterstage Elderly Healthcare) | Prefecture   | Fukuoka                              | 2014 | 2017 | Patient health service utilization        | Others                                    | care utilisation and the incidence of medical institutional death     | Older persons              | aged ≥75 years          |                        |
| Kono 2021     | Five-year disease-related risk of mortality in ambulatory frail older Japanese                                                                                                                   | NHI/LSEHS | long-term care and health insurance claims data (accumulated electronically by local governments; SOHA study)                                   | Municipality | Izumi, Misaki, and Izumiotsu (Osaka) | 2012 | 2017 | Clinical epidemiology, course of diseases | Others                                    | Five-year disease-related risk of mortality in ambulatory frail older | Older persons              | aged ≥65 years          |                        |
| Iwagami 2019  | Association between recorded medical diagnoses and incidence of long-term care needs certification: a case control study using linked medical and long-term care data in two Japanese cities     | NHI/LSEHS | medical and long-term care insurance claims                                                                                                     | Municipality | two cities                           | 2012 | 2016 | Clinical epidemiology, course of diseases | Health policy evaluation and utilization  | Others                                                                | all disease categories     | Older persons           | people aged ≥75 years  |
| Mori 2019     | The associations of multimorbidity with the sum of annual medical and long-term care expenditures in Japan                                                                                       | NHI/LSEHS | medical insurance claims data (of the Late-Stage Medical Care System for the Elderly) and LTC insurance claims data                             | Municipality | Kashiwa city                         | 2012 | 2013 | Health economics                          | Others                                    | multimorbidity (Charlson Comorbidity Index scores)                    | Older persons              | adults ≥75 years        |                        |
| Sakai 2019    | Validation of claims data to identify death among aged persons utilizing enrollment data from health insurance unions                                                                            | JMDC      |                                                                                                                                                 | Nationwide   |                                      | 2012 | 2015 | Research methodology                      | Others                                    | Inpatient and outpatient deaths                                       | Older persons              | aged 65–74 years        |                        |
| Matsuda 2019  | [Big data analysis of medical and nursing care: A study on evaluating the quality of collaboration between home medical care and long-term care]*                                                | NHI/LSEHS | medical insurance claims and LTC insurance claims data                                                                                          | Others       | municipality in Western Japan        | 2012 | 2017 | Quality of care                           | Health policy evaluation and utilization  | Others                                                                | Not specified              | Older persons           | aged 75 years or older |
| Masuzawa 2019 | [Analysis of a long-term health care organization from structural analysis of medical expenditures of the elderly]                                                                               | NHI/LSEHS | National Health Insurance and the late-stage medical care system                                                                                | Municipality | Yokohama, Kawasaki, and Odawara      | 2010 | 2015 | Health economics                          | Others                                    | Not specified                                                         | Older persons              | Older People            |                        |
| Takada 2018   | Development and validation of a prediction model for functional decline in older medical inpatients                                                                                              | MDV       |                                                                                                                                                 | Nationwide   |                                      | 2014 | 2015 | Prediction model                          | Clinical epidemiology, course of diseases | Others                                                                | risk of functional decline | Older persons           | 65 years old or older  |
| Matsuda 2018  | [Big data analysis of medical and nursing care: An analysis of the structure of injury and disease according to the level of nursing care required]*                                             | NHI/LSEHS | medical insurance claims and LTC insurance claims data                                                                                          | Others       | A municipality in Western Japan      | 2015 | 2015 | Health policy evaluation and utilization  | Others                                    | common diseases                                                       | Older persons              | Older People            |                        |
| Matsuda 2018  | [Big data analysis of medical and nursing care: A trial study on the economic effects of long-term care prevention and comprehensive lifestyle projects]*                                        | NHI/LSEHS | medical insurance claims and LTC insurance claims data                                                                                          | Others       | A municipality in Western Japan      | 2008 | 2014 | Health policy evaluation and utilization  | Others                                    | Not specified                                                         | Older persons              | Older People            |                        |
| Matsuda 2018  | [Big data analysis of medical and nursing care: Examination of the ideal "family pharmacy" from the perspective of the calculation of pharmaceutical management fees]*                           | NHI/LSEHS | Dispensing claims (The National Health Insurance system and Late Elders' Health Insurance)                                                      | Others       | A municipality in Western Japan      | 2015 | 2015 | Health policy evaluation and utilization  | Others                                    | Not specified                                                         |                            |                         |                        |
| Ishizaki 2017 | Cumulative number of hospital bed days among older adults in the last year of life: A retrospective cohort study                                                                                 | NHI/LSEHS | medical insurance claims and LTC insurance claims data                                                                                          | Municipality | Soma City                            | 2006 | 2009 | Medical treatment status                  | Others                                    | main cause of death                                                   | Older persons              | aged ≥65years           |                        |
| Akiyama 2015  | [About factors relating to the admission of the elderly with nursing care needs certification]                                                                                                   | NHI/LSEHS | National Health Insurance and the late-stage medical care system (+LTC insurance)                                                               | Municipality | A city in Hokkaido prefecture        | 2007 | 2009 | Health policy evaluation and utilization  | Others                                    | nursing care needs                                                    | Older persons              | aged 65 years and above |                        |
| Kimura 2010   | Development of a database of health insurance claims: standardization of disease classifications and anonymous record linkage                                                                    | JMDC      |                                                                                                                                                 | Nationwide   |                                      | 2003 | 2003 | Research methodology                      | Others                                    | Development of a database                                             |                            |                         |                        |
| Matsuda 2010  | [Development of a consolidated analysis system for health insurance/long-term care insurance claims and specific health checkup data]*                                                           | NHI/LSEHS | medical insurance claims and LTC insurance claims data                                                                                          | Municipality | A municipality in Fukuoka            | 2009 | 2009 | Research methodology                      | Others                                    | Not specified                                                         |                            |                         |                        |
| Hirota 2020   | Association between clinic physician workforce and avoidable readmission: a retrospective database research                                                                                      | DPC       |                                                                                                                                                 | Nationwide   |                                      | 2014 | 2014 | Health policy evaluation and utilization  | Others                                    | ambulatory care sensitive conditions                                  | Older persons              | ≥65 years of age        |                        |

|                 |                                                                                                                                                                                                                            |           |                                                                                                |              |                        |      |      |                                           |                                          |        |                                                                 |                                                            |                                 |
|-----------------|----------------------------------------------------------------------------------------------------------------------------------------------------------------------------------------------------------------------------|-----------|------------------------------------------------------------------------------------------------|--------------|------------------------|------|------|-------------------------------------------|------------------------------------------|--------|-----------------------------------------------------------------|------------------------------------------------------------|---------------------------------|
| Fujita 2016     | Income Related Inequality of Health Care Access in Japan: A Retrospective Cohort Study                                                                                                                                     | NHI/LSEHS | NHI                                                                                            | Municipality | Chiba City             | 2012 | 2014 | Socioeconomic comparison                  | Patient health service utilization       | Others | health care access                                              | Others                                                     | 0-74 years old                  |
| Suzuki 2014     | [Regional diagnosis of municipalities within the prefecture using public data: Regional disparities in medical expenses: Regional diagnosis based on data on health insurance claims]*                                     | NHI/LSEHS | NHI                                                                                            | Prefecture   | Miyagi                 | 2012 | 2012 | Health economics                          | Socioeconomic comparison                 | Others | Not specified                                                   |                                                            |                                 |
| Kisa 2012       | Medical Reimbursement Receipt Analysis to Determine the Relationship between Disease Type and Patients' Healthcare-seeking Behavior                                                                                        | NHI/LSEHS | NHI                                                                                            | Municipality | four towns in Hokkaido | 2006 | 2010 | Patient health service utilization        |                                          | Others | disease type and healthcare-seeking behavior                    |                                                            |                                 |
| Miyata 2010     | Assessment of hospital performance with a case-mix standardized mortality model using an existing administrative database in Japan                                                                                         | DPC       |                                                                                                | Nationwide   |                        | 2006 | 2006 | Prediction model                          | Health policy evaluation and utilization | Others | hospital performance                                            |                                                            |                                 |
| Nejiri 2019     | Comorbidity status in hospitalized elderly in Japan: Analysis from National Database of Health Insurance Claims and Specific Health Checkups                                                                               | NDB       |                                                                                                | Nationwide   |                        | 2015 | 2016 | Clinical epidemiology, course of diseases |                                          | Others | comorbidity status of hospitalized elderly patients             | Older persons                                              | aged ≥60 years                  |
| Miyazaki 2012   | A study on medical cost analysis and construction of an evaluation system for optimization of medical costs in Shimane Prefecture (2010)                                                                                   | NHI/LSEHS | NHI                                                                                            | Prefecture   | Shimane                | 2001 | 2010 | Health economics                          | Health policy evaluation and utilization | Others | Not specified                                                   | Others                                                     | under 75 years                  |
| Iwabuchi 2014   | [Disease estimation and medical practice estimation using DPC data and regional population estimates: Reflection of a decline in biological functions and development of lifestyle-related diseases]*                      | DPC       | Estimate of population                                                                         | Prefecture   | Yamagata               | 2012 | 2013 | Health policy evaluation and utilization  |                                          | Others | not specified                                                   |                                                            |                                 |
| Kuwabara 2011   | Contribution of case-mix classification to profiling hospital characteristics and productivity                                                                                                                             | DPC       |                                                                                                | Nationwide   |                        | 2006 | 2006 | Health policy evaluation and utilization  |                                          | Others | not specified                                                   |                                                            |                                 |
| Fushimi 2010    | [HCSI initiative research paper: Factors associated with hospital selection of inpatients analyzed by patient survey data and DPC data]                                                                                    | DPC       |                                                                                                | Nationwide   |                        | 2008 | 2008 | Patient health service utilization        | Health policy evaluation and utilization | Others | not specified                                                   |                                                            |                                 |
| Tanaka 2011     | [[For more efficient management of the operating department: What is the index of efficiency?] Examination and multi-institutional comparison of the index of efficiency of operating room management]*                    | DPC       |                                                                                                | Nationwide   |                        | 2006 | 2008 | Research methodology                      |                                          | Others | Not specified                                                   |                                                            |                                 |
| Sato 2020       | Retrieving and Analyzing Hospital Service Suspensions from Regional Healthcare Insurance Claims Data                                                                                                                       | Others    | insurance claims dataset of 91 regional public insurance providers in the Mie prefectural area | Prefecture   | Mie                    | 2013 | 2017 | Health policy evaluation and utilization  |                                          | Others | Not specified                                                   |                                                            |                                 |
| Mitsutake 2020  | [Examination of international statistical reports created by utilizing databases such as health insurance claims information]*                                                                                             | NDB       | +NDB Open data                                                                                 | Nationwide   |                        | 2009 | 2014 | Medical treatment status                  | Health policy evaluation and utilization | Others | medical treatment information                                   |                                                            |                                 |
| Kimura 2019     | Validation and Recalibration of Charlson and Elixhauser Comorbidity Indices Based on Data From a Japanese Insurance Claims Database                                                                                        | JMDC      |                                                                                                | Nationwide   |                        | 2011 | 2016 | Prediction model                          | Research methodology                     | Others | Not specified                                                   | Others                                                     | aged ≥18 years                  |
| Doi 2018        | [An Analysis of Factors Affecting Regional Differences in Home-care Utilization Levels Using Geographic Information Systems]                                                                                               | NHI/LSEHS | National Health Insurance and Later-Stage Elderly Healthcare System                            | Municipality | Funabashi city         | 2013 | 2014 | Medical treatment status                  | Socioeconomic comparison                 | Others | Not specified                                                   | Older persons                                              | aged ≥65 years                  |
| Tanihara 2017   | [Comparison of the number of health insurance claims per population by major classification of injuries and diseases in the social medical treatment survey and society health insurance claims data]*                     | JMDC      | Statistics of Medical Care Activities in Public Health Insurance (MHLW)                        | Nationwide   |                        | 2014 | 2014 | Research methodology                      |                                          | Others | Not specified                                                   |                                                            |                                 |
| Kimura 2015     | [Same Examinations in Different Healthcare Providers in the Same Month of Referral, Analysis by Reimbursement Claim Database]                                                                                              | NDB       | Sampling data                                                                                  | Nationwide   |                        | 2011 | 2011 | Medical treatment status                  |                                          | Others | same examinations in different healthcare provider              |                                                            |                                 |
| Takenouchi 2013 | [Combined Anonymization Considering Attackers in Data Holders]                                                                                                                                                             | JMDC      |                                                                                                | Nationwide   |                        | 2005 | 2011 | Research methodology                      |                                          | Others | Not specific (diabetes)                                         |                                                            |                                 |
| Kobayashi 2012  | [Calculation of clinical indices using DPC data: Focusing on AHRQ Patient Safety Indicators]*                                                                                                                              | DPC       |                                                                                                | Nationwide   |                        | 2009 | 2009 | Quality of care                           | Research methodology                     | Others | Patient Safety Indicator                                        |                                                            |                                 |
| Ohbe 2021       | Effect of Daikenchuto for Mechanically Ventilated Patients With Enteral Feeding Intolerance: A Propensity Score-Matched Analysis Using a Nationwide Administrative Inpatient Database                                      | DPC       |                                                                                                | Nationwide   |                        | 2010 | 2018 | Intervention effect                       |                                          | Others | enteral feeding intolerance                                     | Others                                                     | aged ≥18 years                  |
| Ohbe 2021       | Small-bore feeding tube versus large-bore sump tube for early enteral nutrition in mechanically ventilated patients: A nationwide inpatient database study                                                                 | DPC       |                                                                                                | Nationwide   |                        | 2010 | 2018 | Intervention effect                       |                                          | Others | early enteral nutrition in mechanically ventilated patients     | Others                                                     | aged ≥18 years                  |
| Maeda 2019      | A comparative analysis of treatment costs for home-based care and hospital-based care in enteral nutrition patients: A retrospective analysis of claims data                                                               | NHI/LSEHS | Tokyo Metropolitan Association of Medical Care for Senior Citizens                             | Prefecture   | Tokyo                  | 2013 | 2014 | Health economics                          | Medical treatment status                 | Others | enteral nutrition patients                                      | Older persons                                              | aged 75 years or older          |
| Tsugihashi 2021 | Long-term prognosis of enteral feeding and parenteral nutrition in a population aged 75 years and older: a population-based cohort study                                                                                   | NHI/LSEHS | national health insurance claims in the Nara Prefecture                                        | Prefecture   | Nara                   | 2014 | 2016 | Clinical epidemiology, course of diseases |                                          | Others | Long-term prognosis of enteral feeding and parenteral nutrition | Older persons                                              | aged ≥75 years                  |
| Kinoshita 2018  | Prescription pattern and trend of oral contraceptives in Japan: A descriptive study based on pharmacy claims data (2006 - 2014)                                                                                            | Others    | pharmacy claims datasets provided by the nationwide pharmacy chains                            | Nationwide   |                        | 2006 | 2014 | Medical treatment status                  |                                          | Others | oral contraceptives                                             | Others                                                     | aged 11-59 years                |
| Nakata 2017     | Efficiency of inpatient orthopedic surgery in Japan: a medical claims database analysis                                                                                                                                    | JMDC      |                                                                                                | Nationwide   |                        | 2014 | 2014 | Health policy evaluation and utilization  |                                          | Others | inpatient orthopedic surgical case                              |                                                            |                                 |
| Watanabe 2018   | Association between outpatient orthopedic surgery costs and healthcare facility characteristics                                                                                                                            | JMDC      |                                                                                                | Nationwide   |                        | 2014 | 2014 | Health economics                          | Health policy evaluation and utilization | Others | outpatient orthopedic surgery                                   |                                                            |                                 |
| Shoda 2015      | Prophylactic effect of fondaparinux and enoxaparin for preventing pulmonary embolism after total hip or knee arthroplasty: A retrospective observational study using the Japanese Diagnosis Procedure Combination database | DPC       |                                                                                                | Nationwide   |                        | 2008 | 2010 | Intervention effect                       |                                          | Others | after total hip or knee arthroplasty                            |                                                            |                                 |
| Chikuda 2013    | Impact of age and comorbidity burden on mortality and major complications in older adults undergoing orthopaedic surgery: an analysis using the Japanese diagnosis procedure combination database                          | DPC       |                                                                                                | Nationwide   |                        | 2007 | 2010 | Clinical epidemiology, course of diseases | Intervention effect                      | Others | orthopaedic surgery                                             | Others                                                     | patients aged 50 years or older |
| Kadono 2010     | Statistics for orthopedic surgery 2006-2007: data from the Japanese Diagnosis Procedure Combination database                                                                                                               | DPC       |                                                                                                | Nationwide   |                        | 2006 | 2007 | Medical treatment status                  |                                          | Others | orthopedic surgery                                              |                                                            |                                 |
| Fuji 2017       | Incidence of venous thromboembolism and bleeding events in patients with lower extremity orthopedic surgery: a retrospective analysis of a Japanese healthcare database                                                    | MDV       |                                                                                                | Nationwide   |                        | 2008 | 2013 | Intervention effect                       |                                          | Others | Diseases of the circulatory system                              | lower extremity orthopedic surgery, venous thromboembolism |                                 |

|                   |                                                                                                                                                                                                                                       |           |                                                                          |              |                                              |      |      |                                           |                                           |        |                                                                                         |               |                                  |
|-------------------|---------------------------------------------------------------------------------------------------------------------------------------------------------------------------------------------------------------------------------------|-----------|--------------------------------------------------------------------------|--------------|----------------------------------------------|------|------|-------------------------------------------|-------------------------------------------|--------|-----------------------------------------------------------------------------------------|---------------|----------------------------------|
| Urushihara 2018   | [Socioeconomic impacts of policy on Rx-to-OTC switch to prescription of ethical drugs in Japan]                                                                                                                                       | Others    | National Prescription Audit (IMS Health)                                 | Nationwide   |                                              | 2008 | 2014 | Health policy evaluation and utilization  | Health economics                          | Others | OTC switching                                                                           |               |                                  |
| Suzuki 2018       | Trend in otolaryngological surgeries in an era of super-aging: Descriptive statistics using a Japanese inpatient database                                                                                                             | DPC       |                                                                          | Nationwide   |                                              | 2007 | 2014 | Medical treatment status                  |                                           | Others | patients underwent otolaryngological surgeries                                          |               |                                  |
| Miyawaki 2017     | Impact of medical subsidy disqualification on children's healthcare utilization: A difference-in-differences analysis from Japan                                                                                                      | NHI/LSEHS | NHI                                                                      | Municipality | a city within the Tokyo metropolitan         | 2012 | 2014 | Health policy evaluation and utilization  | Patient health service utilization        | Others | outpatient service utilization                                                          | Children      | school-age children              |
| Nishioka 2020     | Frequent outpatient attendance among people on the governmental welfare programme in Japan: assessing both patient and supplier characteristics                                                                                       | Others    | medical assistance claim data, municipal public assistance databases     | Municipality | two suburban municipalities, Osaka and Tokyo | 2016 | 2016 | Patient health service utilization        | Socioeconomic comparison                  | Others | Frequent outpatient attendance                                                          |               |                                  |
| Matsui 2018       | Recent Trends in the Practice of Procedural Sedation Under Local Anesthesia for Catheter Ablation, Gastrointestinal Endoscopy, and Endoscopic Surgery in Japan: A Retrospective Database Study in Clinical Practice from 2012 to 2015 | MDV       |                                                                          | Nationwide   |                                              | 2012 | 2015 | Medical treatment status                  | Clinical epidemiology, course of diseases | Others | catheter ablation, gastrointestinal endoscopic examination and surgery, dexmedetomidine | Others        | aged ≥18 years                   |
| Yonekura 2018     | Preoperative pulmonary function tests before low-risk surgery in Japan: a retrospective cohort study using a claims database                                                                                                          | JMDC      |                                                                          | Nationwide   |                                              | 2012 | 2016 | Medical treatment status                  | Quality of care                           | Others | pulmonary function tests                                                                | Others        | aged 20-64 years                 |
| Mitsutake 2020    | Associations of Hospital Discharge Services With Potentially Avoidable Readmissions Within 30 Days Among Older Adults After Rehabilitation in Acute Care Hospitals in Tokyo, Japan                                                    | NHI/LSEHS | Tokyo Extended Association of Medical Care for Latter-Stage Older People | Prefecture   | Tokyo                                        | 2013 | 2014 | Intervention effect                       |                                           | Others | underwent rehabilitation and were discharged to home                                    | Older persons | aged ≥75 years                   |
| Tsuchiya-Ito 2020 | Association of household income with home-based rehabilitation and home help service utilization among long-term home care service users                                                                                              | NHI/LSEHS | LTC insurance claims and medical claims                                  | Municipality | Kashiwa City                                 | 2012 | 2013 | Socioeconomic comparison                  | Health policy evaluation and utilization  | Others | home-based rehabilitation and home help services                                        | Older persons | aged ≥65 years                   |
| Mitsutake 2018    | [The outpatients of life rehabilitation by medical insurance service among older aged over 75 in Japan]                                                                                                                               | NHI/LSEHS |                                                                          | Prefecture   | Tokyo                                        | 2014 | 2014 | Health policy evaluation and utilization  |                                           | Others | maintenance rehabilitation                                                              | Older persons | 75 years or older                |
| Matsuda 2018      | [Big data analysis of medical and nursing care: An analysis of characteristics of outpatient rehabilitation and short-term intensive rehabilitation recipients]*                                                                      | NHI/LSEHS | medical insurance claims and LTC insurance claims data                   | Others       | municipalities in Western Japan              | 2011 | 2016 | Clinical epidemiology, course of diseases | Health policy evaluation and utilization  | Others | rehabilitation services                                                                 | Older persons | Older People                     |
| Matsuda 2018      | [Big data analysis of medical and nursing care: An analysis of user characteristics by type of home rehabilitation services]*                                                                                                         | NHI/LSEHS | medical insurance claims and LTC insurance claims data                   | Others       | municipalities in Western Japan              | 2015 | 2015 | Health policy evaluation and utilization  |                                           | Others | home rehabilitation                                                                     | Older persons | Older People                     |
| Yoshikawa 2019    | Effects of active smoking on postoperative outcomes in hospitalised patients undergoing elective surgery: a retrospective analysis of an administrative claims database in Japan                                                      | MDV       |                                                                          | Nationwide   |                                              | 2018 |      | Clinical epidemiology, course of diseases |                                           | Others | effects of smoking on prognosis after elective surgeries                                | Others        | 20 years of age or older         |
| Mano 2015         | Adherence to changing from brand-name to generic atorvastatin in newly treated patients: a retrospective cohort study using health insurance claims                                                                                   | JMDC      |                                                                          | Nationwide   |                                              | 2011 | 2012 | Patient health service utilization        | Health policy evaluation and utilization  | Others | statin therapy                                                                          | Others        | aged ≥18 years                   |
| Takizawa 2015     | Price difference as a predictor of the selection between brand name and generic statins in Japan                                                                                                                                      | JMDC      |                                                                          | Nationwide   |                                              | 2008 | 2011 | Patient health service utilization        | Health policy evaluation and utilization  | Others | statin users                                                                            |               |                                  |
| Gao 2021          | Comparison of adherence, persistence, and clinical outcome of generic and brand-name statin users: A retrospective cohort study using the Japanese claims database                                                                    | JMDC      |                                                                          | Nationwide   |                                              | 2014 | 2016 | Patient health service utilization        | Health policy evaluation and utilization  | Others | statin users                                                                            | Others        | aged ≥18 years                   |
| Ohbe 2021         | Clinical Trajectories of Suicide Attempts and Self-harm in Patients Admitted to Acute-care Hospitals in Japan: A Nationwide Inpatient Database Study                                                                                  | DPC       |                                                                          | Nationwide   |                                              | 2015 | 2017 | Clinical epidemiology, course of diseases | Medical treatment status                  | Others | patients hospitalized for suicide attempts or self-harm                                 | Others        | aged ≥10 years                   |
| Miyawaki 2021     | Changes in Surgeries and Therapeutic Procedures During the COVID-19 Outbreak: A Longitudinal Study of Acute Care Hospitals in Japan                                                                                                   | MDV       |                                                                          | Nationwide   |                                              | 2019 | 2020 | Medical treatment status                  | COVID-19                                  | Others | number of surgeries during the COVID-19 outbreak                                        |               |                                  |
| Koizumi 2019      | Tranexamic acid and post-tonsillectomy hemorrhage: propensity score and instrumental variable analyses                                                                                                                                | DPC       |                                                                          | Nationwide   |                                              | 2010 | 2016 | Intervention effect                       |                                           | Others | patients who had undergone tonsillectomy                                                | Others        | excluded aged more than 61 years |
| Shiragami 2013    | [An empirical study reviewing factors impacting coverage of the topical adhesive patch by health insurance]                                                                                                                           | JMDC      |                                                                          | Nationwide   |                                              | 2008 | 2010 | Medical treatment status                  | Health policy evaluation and utilization  | Others | topical adhesive patch                                                                  |               |                                  |
| Mizuno 2019       | Indications and outcomes of paediatric tracheotomy: a descriptive study using a Japanese claims database                                                                                                                              | JMDC      |                                                                          | Nationwide   |                                              | 2005 | 2017 | Medical treatment status                  | Intervention effect                       | Others | tracheotomy                                                                             | Children      | aged 0-15 years                  |
| Kitazawa 2017     | Cost Analysis of Transplantation in Japan, Performed With the Use of the National Database                                                                                                                                            | NDB       |                                                                          | Nationwide   |                                              | 2009 | 2010 | Health economics                          |                                           | Others | Transplantation                                                                         |               |                                  |

Supplement file 5 List of frequently occurring diseases

|                                                                                                        |                                                                                                                                                                                            |
|--------------------------------------------------------------------------------------------------------|--------------------------------------------------------------------------------------------------------------------------------------------------------------------------------------------|
| 1) Certain infectious and parasitic diseases                                                           | hepatitis B and C, sepsis/ septic shock                                                                                                                                                    |
| 2) Neoplasms                                                                                           | cancer (general), colon cancer, liver cancer, lung cancer                                                                                                                                  |
| 3) Diseases of the blood and blood-forming organs and certain disorders involving the immune mechanism | disseminated intravascular coagulation (DIC)                                                                                                                                               |
| 4) Endocrine, nutritional and metabolic diseases                                                       | diabetes (with dental, hypertension, kidney outcomes etc.), obesity                                                                                                                        |
| 5) Mental, Behavioral and Neurodevelopmental disorders                                                 | psychiatric disorders (general), psychotropic/ antidepressant/ antipsychotics, depressive disorders, schizophrenia, dementia                                                               |
| 6) Diseases of the nervous system                                                                      | dementia (Alzheimer disease), Parkinson's Disease                                                                                                                                          |
| 7) Diseases of the eye and adnexa                                                                      | glaucoma                                                                                                                                                                                   |
| 8) Diseases of the ear and mastoid process                                                             | otitis media                                                                                                                                                                               |
| 9) Diseases of the circulatory system                                                                  | cardiovascular diseases (general), atrial fibrillation, cardiac arrest, heart failure, myocardial infarction, coronary syndrome/ intervention, hypertension, ischemic stroke, stroke cases |
| 10) Diseases of the respiratory system                                                                 | asthma, COPD, influenza, respiratory infections, pneumonia (including aspiration pneumonia)                                                                                                |
| 11) Diseases of the digestive system                                                                   | acute pancreatitis, dental, gastrointestinal bleeding                                                                                                                                      |
| 12) Diseases of the skin and subcutaneous tissue                                                       | atopic dermatitis, psoriasis                                                                                                                                                               |
| 13) Diseases of the musculoskeletal system and connective tissue                                       | osteoporosis, rheumatoid arthritis                                                                                                                                                         |
| 14) Diseases of the genitourinary system                                                               | chronic kidney disease (CKD), dialysis                                                                                                                                                     |
| 15) Pregnancy, childbirth and the puerperium                                                           | psychiatric disorders in pregnancy (psychotropics, antidepressant)                                                                                                                         |
| 16) Certain conditions originating in the perinatal period                                             | (diverse diseases)                                                                                                                                                                         |
| 17) Congenital malformations, deformations and chromosomal abnormalities                               | (diverse diseases)                                                                                                                                                                         |
| 18) Injury, poisoning and certain other consequences of external causes                                | fracture (particularly hip fracture)                                                                                                                                                       |
| 19) Others (multidisease, not focused on specific diseases)                                            | antimicrobial use, healthcare costs, hospitalizations/ ICU, multidisease, not specified                                                                                                    |

Supplement file 6 Research theme by diseases

|             | *medical treatm |    | *intervention effr |    | *clinical epidemi |    | *health economi |    | *health policy ev |    | *quality of care |    | *research metho |    | *patient health s |    | *socioeconomic |    | *prediction mode |    | *COVID-19 |   | *others |   |     |
|-------------|-----------------|----|--------------------|----|-------------------|----|-----------------|----|-------------------|----|------------------|----|-----------------|----|-------------------|----|----------------|----|------------------|----|-----------|---|---------|---|-----|
|             | Total n         | %  | n                  | %  | n                 | %  | n               | %  | n                 | %  | n                | %  | n               | %  | n                 | %  | n              | %  | n                | %  | n         | % | n       | % |     |
| 1) Certain  | 117             | 37 | 31.6               | 24 | 20.5              | 51 | 43.6            | 21 | 17.9              | 11 | 9.4              | 6  | 5.1             | 5  | 4.3               | 0  | 0.0            | 1  | 0.9              | 2  | 1.7       | 2 | 1.7     | 0 | 0.0 |
| 2) Neoplas  | 162             | 52 | 32.1               | 55 | 34.0              | 31 | 19.1            | 22 | 13.6              | 19 | 11.7             | 7  | 4.3             | 8  | 4.9               | 3  | 1.9            | 6  | 3.7              | 3  | 1.9       | 0 | 0.0     | 1 | 0.6 |
| 3) Disease  | 19              | 4  | 21.1               | 11 | 57.9              | 4  | 21.1            | 1  | 5.3               | 0  | 0.0              | 1  | 5.3             | 1  | 5.3               | 0  | 0.0            | 0  | 0.0              | 0  | 0.0       | 0 | 0.0     | 0 | 0.0 |
| 4) Endocri  | 171             | 45 | 26.3               | 44 | 25.7              | 60 | 35.1            | 24 | 14.0              | 7  | 4.1              | 9  | 5.3             | 8  | 4.7               | 21 | 12.3           | 6  | 3.5              | 1  | 0.6       | 1 | 0.6     | 0 | 0.0 |
| 5) Mental,  | 110             | 54 | 49.1               | 23 | 20.9              | 28 | 25.5            | 14 | 12.7              | 17 | 15.5             | 9  | 8.2             | 2  | 1.8               | 7  | 6.4            | 5  | 4.5              | 1  | 0.9       | 0 | 0.0     | 2 | 1.8 |
| 6) Disease  | 69              | 27 | 39.1               | 22 | 31.9              | 19 | 27.5            | 11 | 15.9              | 6  | 8.7              | 6  | 8.7             | 2  | 2.9               | 1  | 1.4            | 2  | 2.9              | 2  | 2.9       | 0 | 0.0     | 1 | 1.4 |
| 7) Disease  | 22              | 8  | 36.4               | 5  | 22.7              | 5  | 22.7            | 2  | 9.1               | 1  | 4.5              | 1  | 4.5             | 1  | 4.5               | 5  | 22.7           | 0  | 0.0              | 0  | 0.0       | 0 | 0.0     | 0 | 0.0 |
| 8) Disease  | 4               | 1  | 25.0               | 3  | 75.0              | 1  | 25.0            | 0  | 0.0               | 2  | 50.0             | 1  | 25.0            | 0  | 0.0               | 0  | 0.0            | 0  | 0.0              | 0  | 0.0       | 0 | 0.0     | 0 | 0.0 |
| 9) Disease  | 281             | 65 | 23.1               | 99 | 35.2              | 84 | 29.9            | 25 | 8.9               | 37 | 13.2             | 19 | 6.8             | 13 | 4.6               | 15 | 5.3            | 9  | 3.2              | 4  | 1.4       | 2 | 0.7     | 0 | 0.0 |
| 10) Disease | 135             | 35 | 25.9               | 47 | 34.8              | 46 | 34.1            | 14 | 10.4              | 8  | 5.9              | 11 | 8.1             | 3  | 2.2               | 4  | 3.0            | 2  | 1.5              | 6  | 4.4       | 3 | 2.2     | 0 | 0.0 |
| 11) Disease | 115             | 24 | 20.9               | 52 | 45.2              | 29 | 25.2            | 24 | 20.9              | 11 | 9.6              | 12 | 10.4            | 3  | 2.6               | 4  | 3.5            | 1  | 0.9              | 1  | 0.9       | 0 | 0.0     | 0 | 0.0 |
| 12) Disease | 17              | 8  | 47.1               | 6  | 35.3              | 5  | 29.4            | 6  | 35.3              | 1  | 5.9              | 0  | 0.0             | 0  | 0.0               | 2  | 11.8           | 1  | 5.9              | 0  | 0.0       | 0 | 0.0     | 0 | 0.0 |
| 13) Disease | 93              | 28 | 30.1               | 33 | 35.5              | 39 | 41.9            | 15 | 16.1              | 4  | 4.3              | 4  | 4.3             | 1  | 1.1               | 5  | 5.4            | 2  | 2.2              | 1  | 1.1       | 0 | 0.0     | 0 | 0.0 |
| 14) Disease | 75              | 16 | 21.3               | 32 | 42.7              | 29 | 38.7            | 10 | 13.3              | 6  | 8.0              | 5  | 6.7             | 0  | 0.0               | 2  | 2.7            | 2  | 2.7              | 3  | 4.0       | 0 | 0.0     | 0 | 0.0 |
| 15) Pregn   | 25              | 11 | 44.0               | 8  | 32.0              | 10 | 40.0            | 1  | 4.0               | 1  | 4.0              | 0  | 0.0             | 0  | 0.0               | 0  | 0.0            | 2  | 8.0              | 0  | 0.0       | 0 | 0.0     | 0 | 0.0 |
| 16) Certain | 8               | 2  | 25.0               | 4  | 50.0              | 1  | 12.5            | 1  | 12.5              | 1  | 12.5             | 0  | 0.0             | 0  | 0.0               | 0  | 0.0            | 0  | 0.0              | 0  | 0.0       | 1 | 12.5    | 0 | 0.0 |
| 17) Conge   | 13              | 3  | 23.1               | 5  | 38.5              | 4  | 30.8            | 1  | 7.7               | 2  | 15.4             | 1  | 7.7             | 1  | 7.7               | 0  | 0.0            | 0  | 0.0              | 1  | 7.7       | 0 | 0.0     | 1 | 7.7 |
| 18) Injury, | 110             | 15 | 13.6               | 48 | 43.6              | 47 | 42.7            | 10 | 9.1               | 10 | 9.1              | 2  | 1.8             | 5  | 4.5               | 0  | 0.0            | 3  | 2.7              | 2  | 1.8       | 0 | 0.0     | 3 | 2.7 |
| 19) Others  | 238             | 74 | 31.1               | 38 | 16.0              | 38 | 16.0            | 38 | 16.0              | 62 | 26.1             | 11 | 4.6             | 30 | 12.6              | 15 | 6.3            | 17 | 7.1              | 12 | 5.0       | 4 | 1.7     | 2 | 0.8 |

\*up to two diseases/ theme could be choose
